# Supplementary material for: Rapid detection of pathogenic fungi from coastal population with respiratory infections using microfluidic chip technology
Source: Springer Nature journal article supplement (doi:10.1186/s12879-024-09212-4), 2024-03-18

# Respiratory fungal nucleic acid test results

Affiliated Hospital Of Guangdong Medical University

## Basic sample information

|            |                                    |                    |            |               |              |
|------------|------------------------------------|--------------------|------------|---------------|--------------|
| Name       |                                    | Sexuality          | male       | Age           | 73 years old |
| Section    | department of respiratory medicine | Ward               |            | Bed Number    | C19          |
| ID         |                                    | Clinical Diagnosis |            | Sample Types  | sputum       |
| Test Items |                                    | Chip Number        | C030320238 | Sample Number | c19          |

## Detailed Results:

| Serial Number | Test Items                | Detected Results | Remark |
|---------------|---------------------------|------------------|--------|
| 1             | Positive external control | +                |        |
| 2             | Positive internal control | +                |        |
| 3             | Candida albicans          | +                |        |
| 4             | Candida tropicalis        | -                |        |
| 5             | Candida parapsilosis      | -                |        |
| 6             | Candida krusei            | -                |        |
| 7             | Candida glabrata          | -                |        |
| 8             | Candida auris             | -                |        |
| 9             | Aspergillus fumigatus     | -                |        |
| 10            | Aspergillus flavus        | -                |        |
| 11            | Aspergillus niger         | -                |        |
| 12            | Aspergillus terreus       | -                |        |
| 13            | Aspergillus nidulans      | -                |        |
| 14            | Aspergillus calidoustu    | -                |        |
| 15            | Cryptococcus neoformans   | -                |        |
| 16            | Cryptococcus gattii       | -                |        |
| 17            | Mucor circinelloides      | -                |        |
| 18            | Lichtheimia corymbifera   | -                |        |
| 19            | Mucor pusillus            | -                |        |
| 20            | Trichosporon asahii       | -                |        |
| 21            | Pneumocystis jirovecii    | -                |        |
| 22            | Rhizopus oryzae           | -                |        |
| 23            | Negative control          | -                |        |
| 24            | Blank                     | -                |        |

## Results Suggest:

Candida albicans index was positive.

Detector \_\_\_\_\_ Auditor \_\_\_\_\_ Detection date 2020-07-17 18:38:57

# Respiratory fungal nucleic acid test results

Affiliated Hospital Of Guangdong Medical University

## Basic sample information

|            |                            |                    |            |               |                              |
|------------|----------------------------|--------------------|------------|---------------|------------------------------|
| Name       |                            | Sexuality          | Male       | Age           | 56 years old                 |
| Section    | Second affiliated hospital | Ward               |            | Bed Number    |                              |
| ID         |                            | Clinical Diagnosis |            | Sample Types  | bronchoalveolar lavage fluid |
| Test Items |                            | Chip Number        | C030320239 | Sample Number | 20200814001                  |

## Detailed Results:

| Serial Number | Test Items                | Detected Results | Remark |
|---------------|---------------------------|------------------|--------|
| 1             | Positive external control | +                |        |
| 2             | Positive internal control | +                |        |
| 3             | Candida albicans          | -                |        |
| 4             | Candida tropicalis        | -                |        |
| 5             | Candida parapsilosis      | -                |        |
| 6             | Candida krusei            | -                |        |
| 7             | Candida glabrata          | -                |        |
| 8             | Candida auris             | -                |        |
| 9             | Aspergillus fumigatus     | -                |        |
| 10            | Aspergillus flavus        | -                |        |
| 11            | Aspergillus niger         | -                |        |
| 12            | Aspergillus terreus       | -                |        |
| 13            | Aspergillus nidulans      | -                |        |
| 14            | Aspergillus calidoustu    | -                |        |
| 15            | Cryptococcus neoformans   | -                |        |
| 16            | Cryptococcus gattii       | -                |        |
| 17            | Mucor circinelloides      | -                |        |
| 18            | Lichtheimia corymbifera   | -                |        |
| 19            | Mucor pusillus            | -                |        |
| 20            | Trichosporon asahii       | -                |        |
| 21            | Pneumocystis jirovecii    | -                |        |
| 22            | Rhizopus oryzae           | -                |        |
| 23            | Negative control          | -                |        |
| 24            | Blank                     | -                |        |

## Results Suggest:

No abnormality was found after detection.

Detector \_\_\_\_\_ Auditor \_\_\_\_\_ Detection date 2020-08-14 16:32:53

# Respiratory fungal nucleic acid test results

Affiliated Hospital Of Guangdong Medical University

## Basic sample information

|            |     |                    |            |               |              |
|------------|-----|--------------------|------------|---------------|--------------|
| Name       |     | Sexuality          | Male       | Age           | 74 years old |
| Section    | ICU | Ward               |            | Bed Number    | 5            |
| ID         |     | Clinical Diagnosis |            | Sample Types  | sputum       |
| Test Items |     | Chip Number        | C030320241 | Sample Number | 20200821001  |

## Detailed Results:

| Serial Number | Test Items                | Detected Results | Remark |
|---------------|---------------------------|------------------|--------|
| 1             | Positive external control | +                |        |
| 2             | Positive internal control | +                |        |
| 3             | Candida albicans          | -                |        |
| 4             | Candida tropicalis        | +                |        |
| 5             | Candida parapsilosis      | -                |        |
| 6             | Candida krusei            | -                |        |
| 7             | Candida glabrata          | -                |        |
| 8             | Candida auris             | -                |        |
| 9             | Aspergillus fumigatus     | -                |        |
| 10            | Aspergillus flavus        | -                |        |
| 11            | Aspergillus niger         | -                |        |
| 12            | Aspergillus terreus       | -                |        |
| 13            | Aspergillus nidulans      | -                |        |
| 14            | Aspergillus calidoustu    | -                |        |
| 15            | Cryptococcus neoformans   | -                |        |
| 16            | Cryptococcus gattii       | -                |        |
| 17            | Mucor circinelloides      | -                |        |
| 18            | Lichtheimia corymbifera   | -                |        |
| 19            | Mucor pusillus            | -                |        |
| 20            | Trichosporon asahii       | -                |        |
| 21            | Pneumocystis jirovecii    | -                |        |
| 22            | Rhizopus oryzae           | -                |        |
| 23            | Negative control          | -                |        |
| 24            | Blank                     | -                |        |

## Results Suggest:

Candida tropicalis index was positive.

Detector \_\_\_\_\_ Auditor \_\_\_\_\_ Detection date 2020-08-21 17:49:15

# Respiratory fungal nucleic acid test results

Affiliated Hospital Of Guangdong Medical University

## Basic sample information

|            |               |                    |            |               |              |
|------------|---------------|--------------------|------------|---------------|--------------|
| Name       |               | Sexuality          | Male       | Age           | 55 years old |
| Section    | emergency ICU | Ward               |            | Bed Number    | 7            |
| ID         |               | Clinical Diagnosis |            | Sample Types  | sputum       |
| Test Items |               | Chip Number        | C030320242 | Sample Number | 20200821002  |

## Detailed Results:

| Serial Number | Test Items                | Detected Results | Remark |
|---------------|---------------------------|------------------|--------|
| 1             | Positive external control | +                |        |
| 2             | Positive internal control | +                |        |
| 3             | Candida albicans          | -                |        |
| 4             | Candida tropicalis        | +                |        |
| 5             | Candida parapsilosis      | -                |        |
| 6             | Candida krusei            | -                |        |
| 7             | Candida glabrata          | -                |        |
| 8             | Candida auris             | -                |        |
| 9             | Aspergillus fumigatus     | -                |        |
| 10            | Aspergillus flavus        | -                |        |
| 11            | Aspergillus niger         | -                |        |
| 12            | Aspergillus terreus       | -                |        |
| 13            | Aspergillus nidulans      | -                |        |
| 14            | Aspergillus calidoustu    | -                |        |
| 15            | Cryptococcus neoformans   | -                |        |
| 16            | Cryptococcus gattii       | -                |        |
| 17            | Mucor circinelloides      | -                |        |
| 18            | Lichtheimia corymbifera   | -                |        |
| 19            | Mucor pusillus            | -                |        |
| 20            | Trichosporon asahii       | -                |        |
| 21            | Pneumocystis jirovecii    | -                |        |
| 22            | Rhizopus oryzae           | -                |        |
| 23            | Negative control          | -                |        |
| 24            | Blank                     | -                |        |

## Results Suggest:

Candida tropicalis index was positive.

Detector \_\_\_\_\_ Auditor \_\_\_\_\_ Detection date 2020-08-22 11:57:25

# Respiratory fungal nucleic acid test results

Affiliated Hospital Of Guangdong Medical University

## Basic sample information

|            |               |                    |            |               |              |
|------------|---------------|--------------------|------------|---------------|--------------|
| Name       |               | Sexuality          | Male       | Age           | 80 years old |
| Section    | emergency ICU | Ward               |            | Bed Number    | 9            |
| ID         |               | Clinical Diagnosis |            | Sample Types  | sputum       |
| Test Items |               | Chip Number        | C030320243 | Sample Number | 20200821003  |

## Detailed Results:

| Serial Number | Test Items                | Detected Results | Remark |
|---------------|---------------------------|------------------|--------|
| 1             | Positive external control | +                |        |
| 2             | Positive internal control | +                |        |
| 3             | Candida albicans          | +                |        |
| 4             | Candida tropicalis        | -                |        |
| 5             | Candida parapsilosis      | -                |        |
| 6             | Candida krusei            | -                |        |
| 7             | Candida glabrata          | -                |        |
| 8             | Candida auris             | -                |        |
| 9             | Aspergillus fumigatus     | -                |        |
| 10            | Aspergillus flavus        | -                |        |
| 11            | Aspergillus niger         | -                |        |
| 12            | Aspergillus terreus       | -                |        |
| 13            | Aspergillus nidulans      | -                |        |
| 14            | Aspergillus calidoustu    | -                |        |
| 15            | Cryptococcus neoformans   | -                |        |
| 16            | Cryptococcus gattii       | -                |        |
| 17            | Mucor circinelloides      | -                |        |
| 18            | Lichtheimia corymbifera   | -                |        |
| 19            | Mucor pusillus            | -                |        |
| 20            | Trichosporon asahii       | -                |        |
| 21            | Pneumocystis jirovecii    | -                |        |
| 22            | Rhizopus oryzae           | -                |        |
| 23            | Negative control          | -                |        |
| 24            | Blank                     | -                |        |

## Results Suggest:

Candida albicans index was positive.

Detector \_\_\_\_\_ Auditor \_\_\_\_\_ Detection date 2020-08-22 14:12:35

# Respiratory fungal nucleic acid test results

Affiliated Hospital Of Guangdong Medical University

## Basic sample information

|            |               |                    |            |               |              |
|------------|---------------|--------------------|------------|---------------|--------------|
| Name       |               | Sexuality          | Male       | Age           | 54 years old |
| Section    | emergency ICU | Ward               |            | Bed Number    | 204          |
| ID         |               | Clinical Diagnosis |            | Sample Types  | sputum       |
| Test Items |               | Chip Number        | C030320244 | Sample Number | 20200821004  |

## Detailed Results:

| Serial Number | Test Items                | Detected Results | Remark |
|---------------|---------------------------|------------------|--------|
| 1             | Positive external control | +                |        |
| 2             | Positive internal control | +                |        |
| 3             | Candida albicans          | +                |        |
| 4             | Candida tropicalis        | -                |        |
| 5             | Candida parapsilosis      | +                |        |
| 6             | Candida krusei            | -                |        |
| 7             | Candida glabrata          | -                |        |
| 8             | Candida auris             | -                |        |
| 9             | Aspergillus fumigatus     | -                |        |
| 10            | Aspergillus flavus        | -                |        |
| 11            | Aspergillus niger         | -                |        |
| 12            | Aspergillus terreus       | -                |        |
| 13            | Aspergillus nidulans      | -                |        |
| 14            | Aspergillus calidoustu    | -                |        |
| 15            | Cryptococcus neoformans   | -                |        |
| 16            | Cryptococcus gattii       | -                |        |
| 17            | Mucor circinelloides      | -                |        |
| 18            | Lichtheimia corymbifera   | -                |        |
| 19            | Mucor pusillus            | -                |        |
| 20            | Trichosporon asahii       | +                |        |
| 21            | Pneumocystis jirovecii    | -                |        |
| 22            | Rhizopus oryzae           | -                |        |
| 23            | Negative control          | -                |        |
| 24            | Blank                     | -                |        |

## Results Suggest:

Candida albicans, Candida parapsilosis and Trichosporon asahii indexes were positive.

Detector \_\_\_\_\_ Auditor \_\_\_\_\_ Detection date 2020-08-22 14:14:38

# Respiratory fungal nucleic acid test results

Affiliated Hospital Of Guangdong Medical University

## Basic sample information

|            |               |                    |            |               |              |
|------------|---------------|--------------------|------------|---------------|--------------|
| Name       |               | Sexuality          | Male       | Age           | 49 years old |
| Section    | emergency ICU | Ward               |            | Bed Number    | 208          |
| ID         |               | Clinical Diagnosis |            | Sample Types  | sputum       |
| Test Items |               | Chip Number        | C030320240 | Sample Number | 20200821005  |

## Detailed Results:

| Serial Number | Test Items                | Detected Results | Remark |
|---------------|---------------------------|------------------|--------|
| 1             | Positive external control | +                |        |
| 2             | Positive internal control | +                |        |
| 3             | Candida albicans          | +                |        |
| 4             | Candida tropicalis        | -                |        |
| 5             | Candida parapsilosis      | -                |        |
| 6             | Candida krusei            | -                |        |
| 7             | Candida glabrata          | -                |        |
| 8             | Candida auris             | -                |        |
| 9             | Aspergillus fumigatus     | -                |        |
| 10            | Aspergillus flavus        | -                |        |
| 11            | Aspergillus niger         | -                |        |
| 12            | Aspergillus terreus       | -                |        |
| 13            | Aspergillus nidulans      | -                |        |
| 14            | Aspergillus calidoustu    | -                |        |
| 15            | Cryptococcus neoformans   | -                |        |
| 16            | Cryptococcus gattii       | -                |        |
| 17            | Mucor circinelloides      | -                |        |
| 18            | Lichtheimia corymbifera   | -                |        |
| 19            | Mucor pusillus            | -                |        |
| 20            | Trichosporon asahii       | -                |        |
| 21            | Pneumocystis jirovecii    | -                |        |
| 22            | Rhizopus oryzae           | -                |        |
| 23            | Negative control          | -                |        |
| 24            | Blank                     | -                |        |

## Results Suggest:

Candida albicans index was positive.

Detector \_\_\_\_\_ Auditor \_\_\_\_\_ Detection date 2020-08-21 18:48:31

# Respiratory fungal nucleic acid test results

Affiliated Hospital Of Guangdong Medical University

## Basic sample information

|            |     |                    |            |               |              |
|------------|-----|--------------------|------------|---------------|--------------|
| Name       |     | Sexuality          | Male       | Age           | 58 years old |
| Section    | ICU | Ward               |            | Bed Number    |              |
| ID         |     | Clinical Diagnosis |            | Sample Types  | sputum       |
| Test Items |     | Chip Number        | C030320245 | Sample Number | 20201030001  |

## Detailed Results:

| Serial Number | Test Items                | Detected Results | Remark |
|---------------|---------------------------|------------------|--------|
| 1             | Positive external control | +                |        |
| 2             | Positive internal control | +                |        |
| 3             | Candida albicans          | +                |        |
| 4             | Candida tropicalis        | -                |        |
| 5             | Candida parapsilosis      | -                |        |
| 6             | Candida krusei            | -                |        |
| 7             | Candida glabrata          | -                |        |
| 8             | Candida auris             | -                |        |
| 9             | Aspergillus fumigatus     | -                |        |
| 10            | Aspergillus flavus        | -                |        |
| 11            | Aspergillus niger         | -                |        |
| 12            | Aspergillus terreus       | -                |        |
| 13            | Aspergillus nidulans      | -                |        |
| 14            | Aspergillus calidoustu    | -                |        |
| 15            | Cryptococcus neoformans   | -                |        |
| 16            | Cryptococcus gattii       | -                |        |
| 17            | Histoplasma capsulatum    | -                |        |
| 18            | Lichtheimia corymbifera   | -                |        |
| 19            | Mucor pusillus            | -                |        |
| 20            | Trichosporon asahii       | -                |        |
| 21            | Pneumocystis jirovecii    | -                |        |
| 22            | Rhizopus oryzae           | -                |        |
| 23            | Negative control          | -                |        |
| 24            | Blank                     | -                |        |

## Results Suggest:

Candida albicans index was positive.

Detector \_\_\_\_\_ Auditor \_\_\_\_\_ Detection date 2023-06-25 20:44:45



# Respiratory fungal nucleic acid test results

Affiliated Hospital Of Guangdong Medical University

## Basic sample information

|            |     |                    |            |               |              |
|------------|-----|--------------------|------------|---------------|--------------|
| Name       |     | Sexuality          | Male       | Age           | 89 years old |
| Section    | ICU | Ward               |            | Bed Number    |              |
| ID         |     | Clinical Diagnosis |            | Sample Types  | sputum       |
| Test Items |     | Chip Number        | C030320246 | Sample Number | 20201030002  |

## Detailed Results:

| Serial Number | Test Items                | Detected Results | Remark |
|---------------|---------------------------|------------------|--------|
| 1             | Positive external control | +                |        |
| 2             | Positive internal control | +                |        |
| 3             | Candida albicans          | -                |        |
| 4             | Candida tropicalis        | -                |        |
| 5             | Candida parapsilosis      | -                |        |
| 6             | Candida krusei            | -                |        |
| 7             | Candida glabrata          | -                |        |
| 8             | Candida auris             | -                |        |
| 9             | Aspergillus fumigatus     | -                |        |
| 10            | Aspergillus flavus        | -                |        |
| 11            | Aspergillus niger         | -                |        |
| 12            | Aspergillus terreus       | -                |        |
| 13            | Aspergillus nidulans      | -                |        |
| 14            | Aspergillus calidoustu    | -                |        |
| 15            | Cryptococcus neoformans   | -                |        |
| 16            | Cryptococcus gattii       | -                |        |
| 17            | Histoplasma capsulatum    | -                |        |
| 18            | Lichtheimia corymbifera   | -                |        |
| 19            | Mucor pusillus            | -                |        |
| 20            | Trichosporon asahii       | -                |        |
| 21            | Pneumocystis jirovecii    | -                |        |
| 22            | Rhizopus oryzae           | -                |        |
| 23            | Negative control          | -                |        |
| 24            | Blank                     | -                |        |

## Results Suggest:

No abnormality was found after detection.

Detector \_\_\_\_\_ Auditor \_\_\_\_\_ Detection date 2020-10-30 16:59:25

# Respiratory fungal nucleic acid test results

Affiliated Hospital Of Guangdong medical university

## Basic sample information

|            |     |                    |            |               |              |
|------------|-----|--------------------|------------|---------------|--------------|
| Name       |     | Sexuality          | Female     | Age           | 83 years old |
| Section    | ICU | Ward               |            | Bed Number    |              |
| ID         |     | Clinical Diagnosis |            | Sample Types  | sputum       |
| Test Items |     | Chip Number        | C030320248 | Sample Number | 20201030003  |

## Detailed Results:

| Serial Number | Test Items                | Detected Results | Remark |
|---------------|---------------------------|------------------|--------|
| 1             | Positive external control | +                |        |
| 2             | Positive internal control | +                |        |
| 3             | Candida albicans          | +                |        |
| 4             | Candida tropicalis        | -                |        |
| 5             | Candida parapsilosis      | -                |        |
| 6             | Candida krusei            | -                |        |
| 7             | Candida glabrata          | -                |        |
| 8             | Candida auris             | -                |        |
| 9             | Aspergillus fumigatus     | -                |        |
| 10            | Aspergillus flavus        | -                |        |
| 11            | Aspergillus niger         | -                |        |
| 12            | Aspergillus terreus       | -                |        |
| 13            | Aspergillus nidulans      | -                |        |
| 14            | Aspergillus calidoustu    | -                |        |
| 15            | Cryptococcus neoformans   | -                |        |
| 16            | Cryptococcus gattii       | -                |        |
| 17            | Histoplasma capsulatum    | -                |        |
| 18            | Lichtheimia corymbifera   | -                |        |
| 19            | Mucor pusillus            | -                |        |
| 20            | Trichosporon asahii       | -                |        |
| 21            | Pneumocystis jirovecii    | -                |        |
| 22            | Rhizopus oryzae           | -                |        |
| 23            | Negative control          | -                |        |
| 24            | Blank                     | -                |        |

## Results Suggest:

Candida albicans index was positive.

Detector \_\_\_\_\_ Auditor \_\_\_\_\_ Detection date 2020-10-30 17:53:45

# Respiratory fungal nucleic acid test results

Affiliated Hospital Of Guangdong medical university

## Basic sample information

|            |     |                    |            |               |              |
|------------|-----|--------------------|------------|---------------|--------------|
| Name       |     | Sexuality          | Male       | Age           | 80 years old |
| Section    | ICU | Ward               |            | Bed Number    |              |
| ID         |     | Clinical Diagnosis |            | Sample Types  | sputum       |
| Test Items |     | Chip Number        | C030320249 | Sample Number | 20201209001  |

## Detailed Results:

| Serial Number | Test Items                | Detected Results | Remark |
|---------------|---------------------------|------------------|--------|
| 1             | Positive external control | +                |        |
| 2             | Positive internal control | +                |        |
| 3             | Candida albicans          | -                |        |
| 4             | Candida tropicalis        | +                |        |
| 5             | Candida parapsilosis      | -                |        |
| 6             | Candida krusei            | -                |        |
| 7             | Candida glabrata          | -                |        |
| 8             | Candida auris             | -                |        |
| 9             | Aspergillus fumigatus     | -                |        |
| 10            | Aspergillus flavus        | -                |        |
| 11            | Aspergillus niger         | -                |        |
| 12            | Aspergillus terreus       | -                |        |
| 13            | Aspergillus nidulans      | -                |        |
| 14            | Aspergillus calidoustu    | -                |        |
| 15            | Cryptococcus neoformans   | -                |        |
| 16            | Cryptococcus gattii       | -                |        |
| 17            | Histoplasma capsulatum    | -                |        |
| 18            | Lichtheimia corymbifera   | -                |        |
| 19            | Mucor pusillus            | -                |        |
| 20            | Trichosporon asahii       | -                |        |
| 21            | Pneumocystis jirovecii    | -                |        |
| 22            | Rhizopus oryzae           | -                |        |
| 23            | Negative control          | -                |        |
| 24            | Blank                     | -                |        |

## Results Suggest:

Candida tropicalis index was positive.

Detector \_\_\_\_\_ Auditor \_\_\_\_\_ Detection date 2020-12-09 17:46:27

# Respiratory fungal nucleic acid test results

Affiliated Hospital Of Guangdong medical university

## Basic sample information

|            |     |                    |            |               |             |
|------------|-----|--------------------|------------|---------------|-------------|
| Name       |     | Sexuality          | Male       | Age           | 5 years old |
| Section    | ICU | Ward               |            | Bed Number    | 204         |
| ID         |     | Clinical Diagnosis |            | Sample Types  | sputum      |
| Test Items |     | Chip Number        | C020420068 | Sample Number | 20201209002 |

## Detailed Results:

| Serial Number | Test Items                | Detected Results | Remark |
|---------------|---------------------------|------------------|--------|
| 1             | Positive external control | +                |        |
| 2             | Positive internal control | +                |        |
| 3             | Candida albicans          | -                |        |
| 4             | Candida tropicalis        | -                |        |
| 5             | Candida parapsilosis      | -                |        |
| 6             | Candida krusei            | -                |        |
| 7             | Candida glabrata          | -                |        |
| 8             | Candida auris             | -                |        |
| 9             | Aspergillus fumigatus     | -                |        |
| 10            | Aspergillus flavus        | -                |        |
| 11            | Aspergillus niger         | -                |        |
| 12            | Aspergillus terreus       | -                |        |
| 13            | Aspergillus nidulans      | -                |        |
| 14            | Aspergillus calidoustu    | -                |        |
| 15            | Cryptococcus neoformans   | -                |        |
| 16            | Cryptococcus gattii       | -                |        |
| 17            | Histoplasma capsulatum    | -                |        |
| 18            | Lichtheimia corymbifera   | -                |        |
| 19            | Mucor pusillus            | -                |        |
| 20            | Trichosporon asahii       | -                |        |
| 21            | Pneumocystis jirovecii    | -                |        |
| 22            | Rhizopus oryzae           | -                |        |
| 23            | Negative control          | -                |        |
| 24            | Blank                     | -                |        |

## Results Suggest:

No abnormality was found after detection.

2020-12-10

Detector \_\_\_\_\_ Auditor \_\_\_\_\_ Detection date 17:12:55

# Respiratory fungal nucleic acid test results

Affiliated Hospital Of Guangdong medical university

## Basic sample information

|            |     |                    |            |               |              |
|------------|-----|--------------------|------------|---------------|--------------|
| Name       |     | Sexuality          | Male       | Age           | 87 years old |
| Section    | ICU | Ward               |            | Bed Number    | 208          |
| ID         |     | Clinical Diagnosis |            | Sample Types  | sputum       |
| Test Items |     | Chip Number        | C020420069 | Sample Number | 20201209003  |

## Detailed Results:

| Serial Number | Test Items                | Detected Results | Remark |
|---------------|---------------------------|------------------|--------|
| 1             | Positive external control | +                |        |
| 2             | Positive internal control | +                |        |
| 3             | Candida albicans          | -                |        |
| 4             | Candida tropicalis        | -                |        |
| 5             | Candida parapsilosis      | -                |        |
| 6             | Candida krusei            | -                |        |
| 7             | Candida glabrata          | -                |        |
| 8             | Candida auris             | -                |        |
| 9             | Aspergillus fumigatus     | -                |        |
| 10            | Aspergillus flavus        | -                |        |
| 11            | Aspergillus niger         | -                |        |
| 12            | Aspergillus terreus       | -                |        |
| 13            | Aspergillus nidulans      | -                |        |
| 14            | Aspergillus calidoustu    | -                |        |
| 15            | Cryptococcus neoformans   | -                |        |
| 16            | Cryptococcus gattii       | -                |        |
| 17            | Histoplasma capsulatum    | -                |        |
| 18            | Lichtheimia corymbifera   | -                |        |
| 19            | Mucor pusillus            | -                |        |
| 20            | Trichosporon asahii       | -                |        |
| 21            | Pneumocystis jirovecii    | -                |        |
| 22            | Rhizopus oryzae           | -                |        |
| 23            | Negative control          | -                |        |
| 24            | Blank                     | -                |        |

## Results Suggest:

No abnormality was found after detection.

Detector \_\_\_\_\_ Auditor \_\_\_\_\_ Detection date 2020-12-11 09:13:38

# Respiratory fungal nucleic acid test results

Affiliated Hospital Of Guangdong medical university

## Basic sample information

|            |     |                    |            |               |              |
|------------|-----|--------------------|------------|---------------|--------------|
| Name       |     | Sexuality          | Male       | Age           | 58 years old |
| Section    | ICU | Ward               |            | Bed Number    | 305          |
| ID         |     | Clinical Diagnosis |            | Sample Types  | sputum       |
| Test Items |     | Chip Number        | C020420072 | Sample Number | 20201209005  |

## Detailed Results:

| Serial Number | Test Items                | Detected Results | Remark |
|---------------|---------------------------|------------------|--------|
| 1             | Positive external control | +                |        |
| 2             | Positive internal control | +                |        |
| 3             | Candida albicans          | -                |        |
| 4             | Candida tropicalis        | -                |        |
| 5             | Candida parapsilosis      | -                |        |
| 6             | Candida krusei            | +                |        |
| 7             | Candida glabrata          | -                |        |
| 8             | Candida auris             | -                |        |
| 9             | Aspergillus fumigatus     | -                |        |
| 10            | Aspergillus flavus        | -                |        |
| 11            | Aspergillus niger         | -                |        |
| 12            | Aspergillus terreus       | -                |        |
| 13            | Aspergillus nidulans      | -                |        |
| 14            | Aspergillus calidoustu    | -                |        |
| 15            | Cryptococcus neoformans   | -                |        |
| 16            | Cryptococcus gattii       | -                |        |
| 17            | Histoplasma capsulatum    | -                |        |
| 18            | Lichtheimia corymbifera   | -                |        |
| 19            | Mucor pusillus            | -                |        |
| 20            | Trichosporon asahii       | -                |        |
| 21            | Pneumocystis jirovecii    | -                |        |
| 22            | Rhizopus oryzae           | -                |        |
| 23            | Negative control          | -                |        |
| 24            | Blank                     | -                |        |

## Results Suggest:

Candida krusei index was positive.

Detector \_\_\_\_\_ Auditor \_\_\_\_\_ Detection date 2020-12-14 17:50:44

# Respiratory fungal nucleic acid test results

Affiliated Hospital Of Guangdong medical university

## Basic sample information

|            |     |                    |            |               |              |
|------------|-----|--------------------|------------|---------------|--------------|
| Name       |     | Sexuality          | Male       | Age           | 42 years old |
| Section    | ICU | Ward               |            | Bed Number    | 311          |
| ID         |     | Clinical Diagnosis |            | Sample Types  | sputum       |
| Test Items |     | Chip Number        | C020420071 | Sample Number | 20201209004  |

## Detailed Results:

| Serial Number | Test Items                | Detected Results | Remark |
|---------------|---------------------------|------------------|--------|
| 1             | Positive external control | +                |        |
| 2             | Positive internal control | +                |        |
| 3             | Candida albicans          | -                |        |
| 4             | Candida tropicalis        | -                |        |
| 5             | Candida parapsilosis      | -                |        |
| 6             | Candida krusei            | -                |        |
| 7             | Candida glabrata          | -                |        |
| 8             | Candida auris             | -                |        |
| 9             | Aspergillus fumigatus     | -                |        |
| 10            | Aspergillus flavus        | -                |        |
| 11            | Aspergillus niger         | -                |        |
| 12            | Aspergillus terreus       | -                |        |
| 13            | Aspergillus nidulans      | -                |        |
| 14            | Aspergillus calidoustu    | -                |        |
| 15            | Cryptococcus neoformans   | -                |        |
| 16            | Cryptococcus gattii       | -                |        |
| 17            | Histoplasma capsulatum    | -                |        |
| 18            | Lichtheimia corymbifera   | -                |        |
| 19            | Mucor pusillus            | -                |        |
| 20            | Trichosporon asahii       | -                |        |
| 21            | Pneumocystis jirovecii    | -                |        |
| 22            | Rhizopus oryzae           | -                |        |
| 23            | Negative control          | -                |        |
| 24            | Blank                     | -                |        |

## Results Suggest:

No abnormality was found after detection.

Detector \_\_\_\_\_ Auditor \_\_\_\_\_ Detection date 2020-12-14 16:54:38

# Respiratory fungal nucleic acid test results

Affiliated Hospital Of Guangdong medical university

## Basic sample information

|            |     |                    |            |               |              |
|------------|-----|--------------------|------------|---------------|--------------|
| Name       |     | Sexuality          | Male       | Age           | 57 years old |
| Section    | ICU | Ward               |            | Bed Number    |              |
| ID         |     | Clinical Diagnosis |            | Sample Types  | sputum       |
| Test Items |     | Chip Number        | C020420067 | Sample Number | 20201210001  |

## Detailed Results:

| Serial Number | Test Items                | Detected Results | Remark |
|---------------|---------------------------|------------------|--------|
| 1             | Positive external control | +                |        |
| 2             | Positive internal control | +                |        |
| 3             | Candida albicans          | -                |        |
| 4             | Candida tropicalis        | -                |        |
| 5             | Candida parapsilosis      | -                |        |
| 6             | Candida krusei            | -                |        |
| 7             | Candida glabrata          | -                |        |
| 8             | Candida auris             | -                |        |
| 9             | Aspergillus fumigatus     | -                |        |
| 10            | Aspergillus flavus        | -                |        |
| 11            | Aspergillus niger         | -                |        |
| 12            | Aspergillus terreus       | -                |        |
| 13            | Aspergillus nidulans      | -                |        |
| 14            | Aspergillus calidoustu    | -                |        |
| 15            | Cryptococcus neoformans   | -                |        |
| 16            | Cryptococcus gattii       | -                |        |
| 17            | Histoplasma capsulatum    | -                |        |
| 18            | Lichtheimia corymbifera   | -                |        |
| 19            | Mucor pusillus            | -                |        |
| 20            | Trichosporon asahii       | -                |        |
| 21            | Pneumocystis jirovecii    | -                |        |
| 22            | Rhizopus oryzae           | -                |        |
| 23            | Negative control          | -                |        |
| 24            | Blank                     | -                |        |

## Results Suggest:

No abnormality was found after detection.

Detector \_\_\_\_\_ Auditor \_\_\_\_\_ Detection date 2020-12-10 16:10:19



# Respiratory fungal nucleic acid test results

Affiliated Hospital Of Guangdong medical university

## Basic sample information

|            |     |                    |            |               |                              |
|------------|-----|--------------------|------------|---------------|------------------------------|
| Name       |     | Sexuality          | Female     | Age           | 92 years old                 |
| Section    | ICU | Ward               |            | Bed Number    | 105                          |
| ID         |     | Clinical Diagnosis |            | Sample Types  | bronchoalveolar lavage fluid |
| Test Items |     | Chip Number        | C020420073 | Sample Number | 2021012002                   |

## Detailed Results:

| Serial Number | Test Items                | Detected Results | Remark |
|---------------|---------------------------|------------------|--------|
| 1             | Positive external control | +                |        |
| 2             | Positive internal control | +                |        |
| 3             | Candida albicans          | +                |        |
| 4             | Candida tropicalis        | -                |        |
| 5             | Candida parapsilosis      | -                |        |
| 6             | Candida krusei            | -                |        |
| 7             | Candida glabrata          | -                |        |
| 8             | Candida auris             | -                |        |
| 9             | Aspergillus fumigatus     | -                |        |
| 10            | Aspergillus flavus        | -                |        |
| 11            | Aspergillus niger         | -                |        |
| 12            | Aspergillus terreus       | -                |        |
| 13            | Aspergillus nidulans      | -                |        |
| 14            | Aspergillus calidoustu    | -                |        |
| 15            | Cryptococcus neoformans   | -                |        |
| 16            | Cryptococcus gattii       | -                |        |
| 17            | Histoplasma capsulatum    | -                |        |
| 18            | Lichtheimia corymbifera   | -                |        |
| 19            | Mucor pusillus            | -                |        |
| 20            | Trichosporon asahii       | -                |        |
| 21            | Pneumocystis jirovecii    | -                |        |
| 22            | Penicillium marneffeii    | -                |        |
| 23            | Negative control          | -                |        |
| 24            | Blank                     | -                |        |

## Results Suggest:

Candida albicans index was positive.

Detector \_\_\_\_\_ Auditor \_\_\_\_\_ Detection date 2021-01-20 16:49:56

# Respiratory fungal nucleic acid test results

Affiliated Hospital Of Guangdong medical university

## Basic sample information

|            |     |                    |            |               |                              |
|------------|-----|--------------------|------------|---------------|------------------------------|
| Name       |     | Sexuality          | Female     | Age           | 84 years old                 |
| Section    | ICU | Ward               |            | Bed Number    | 106                          |
| ID         |     | Clinical Diagnosis |            | Sample Types  | bronchoalveolar lavage fluid |
| Test Items |     | Chip Number        | C020420074 | Sample Number | 20210120003                  |

## Detailed Results:

| Serial Number | Test Items                | Detected Results | Remark |
|---------------|---------------------------|------------------|--------|
| 1             | Positive external control | +                |        |
| 2             | Positive internal control | +                |        |
| 3             | Candida albicans          | +                |        |
| 4             | Candida tropicalis        | -                |        |
| 5             | Candida parapsilosis      | -                |        |
| 6             | Candida krusei            | -                |        |
| 7             | Candida glabrata          | -                |        |
| 8             | Candida auris             | -                |        |
| 9             | Aspergillus fumigatus     | -                |        |
| 10            | Aspergillus flavus        | -                |        |
| 11            | Aspergillus niger         | -                |        |
| 12            | Aspergillus terreus       | -                |        |
| 13            | Aspergillus nidulans      | -                |        |
| 14            | Aspergillus calidoustu    | -                |        |
| 15            | Cryptococcus neoformans   | -                |        |
| 16            | Cryptococcus gattii       | -                |        |
| 17            | Histoplasma capsulatum    | -                |        |
| 18            | Lichtheimia corymbifera   | -                |        |
| 19            | Mucor pusillus            | -                |        |
| 20            | Trichosporon asahii       | -                |        |
| 21            | Pneumocystis jirovecii    | -                |        |
| 22            | Penicillium marneffeii    | -                |        |
| 23            | Negative control          | -                |        |
| 24            | Blank                     | -                |        |

## Results Suggest:

Candida albicans index was positive.

Detector \_\_\_\_\_ Auditor \_\_\_\_\_ Detection date 2021-01-20 17:45:21

# Respiratory fungal nucleic acid test results

Affiliated Hospital Of Guangdong medical university

## Basic sample information

|            |     |                    |            |               |              |
|------------|-----|--------------------|------------|---------------|--------------|
| Name       |     | Sexuality          | Female     | Age           | 79 years old |
| Section    | ICU | Ward               |            | Bed Number    | 203          |
| ID         |     | Clinical Diagnosis |            | Sample Types  | sputum       |
| Test Items |     | Chip Number        | C020420075 | Sample Number | 2021012104   |

## Detailed Results:

| Serial Number | Test Items                | Detected Results | Remark |
|---------------|---------------------------|------------------|--------|
| 1             | Positive external control | +                |        |
| 2             | Positive internal control | +                |        |
| 3             | Candida albicans          | -                |        |
| 4             | Candida tropicalis        | -                |        |
| 5             | Candida parapsilosis      | -                |        |
| 6             | Candida krusei            | -                |        |
| 7             | Candida glabrata          | -                |        |
| 8             | Candida auris             | -                |        |
| 9             | Aspergillus fumigatus     | -                |        |
| 10            | Aspergillus flavus        | -                |        |
| 11            | Aspergillus niger         | -                |        |
| 12            | Aspergillus terreus       | -                |        |
| 13            | Aspergillus nidulans      | -                |        |
| 14            | Aspergillus calidoustu    | -                |        |
| 15            | Cryptococcus neoformans   | -                |        |
| 16            | Cryptococcus gattii       | -                |        |
| 17            | Histoplasma capsulatum    | -                |        |
| 18            | Lichtheimia corymbifera   | -                |        |
| 19            | Mucor pusillus            | -                |        |
| 20            | Trichosporon asahii       | -                |        |
| 21            | Pneumocystis jirovecii    | -                |        |
| 22            | Penicillium marneffeii    | -                |        |
| 23            | Negative control          | -                |        |
| 24            | Blank                     | -                |        |

## Results Suggest:

No abnormality was found after detection.

Detector \_\_\_\_\_ Auditor \_\_\_\_\_ Detection date 2021-01-21 08:58:59

# Respiratory fungal nucleic acid test results

Affiliated Hospital Of Guangdong medical university

## Basic sample information

|            |     |                    |            |               |              |
|------------|-----|--------------------|------------|---------------|--------------|
| Name       |     | Sexuality          | Male       | Age           | 73 years old |
| Section    | ICU | Ward               |            | Bed Number    | 207          |
| ID         |     | Clinical Diagnosis |            | Sample Types  | sputum       |
| Test Items |     | Chip Number        | C020420076 | Sample Number | 2021012005   |

## Detailed Results:

| Serial Number | Test Items                | Detected Results | Remark |
|---------------|---------------------------|------------------|--------|
| 1             | Positive external control | +                |        |
| 2             | Positive internal control | +                |        |
| 3             | Candida albicans          | +                |        |
| 4             | Candida tropicalis        | -                |        |
| 5             | Candida parapsilosis      | -                |        |
| 6             | Candida krusei            | -                |        |
| 7             | Candida glabrata          | -                |        |
| 8             | Candida auris             | -                |        |
| 9             | Aspergillus fumigatus     | -                |        |
| 10            | Aspergillus flavus        | -                |        |
| 11            | Aspergillus niger         | -                |        |
| 12            | Aspergillus terreus       | -                |        |
| 13            | Aspergillus nidulans      | -                |        |
| 14            | Aspergillus calidoustu    | -                |        |
| 15            | Cryptococcus neoformans   | -                |        |
| 16            | Cryptococcus gattii       | -                |        |
| 17            | Histoplasma capsulatum    | -                |        |
| 18            | Lichtheimia corymbifera   | -                |        |
| 19            | Mucor pusillus            | -                |        |
| 20            | Trichosporon asahii       | -                |        |
| 21            | Pneumocystis jirovecii    | -                |        |
| 22            | Penicillium marneffeii    | -                |        |
| 23            | Negative control          | -                |        |
| 24            | Blank                     | -                |        |

## Results Suggest:

Candida albicans index was positive.

Detector \_\_\_\_\_ Auditor \_\_\_\_\_ Detection date 2021-01-21 09:57:23

# Respiratory fungal nucleic acid test results

Affiliated Hospital Of Guangdong medical university

## Basic sample information

|            |     |                    |            |               |              |
|------------|-----|--------------------|------------|---------------|--------------|
| Name       |     | Sexuality          | Female     | Age           | 43 years old |
| Section    | ICU | Ward               |            | Bed Number    | 301          |
| ID         |     | Clinical Diagnosis |            | Sample Types  | sputum       |
| Test Items |     | Chip Number        | C020420161 | Sample Number | 2021012006   |

## Detailed Results:

| Serial Number | Test Items                | Detected Results | Remark |
|---------------|---------------------------|------------------|--------|
| 1             | Positive external control | +                |        |
| 2             | Positive internal control | +                |        |
| 3             | Candida albicans          | +                |        |
| 4             | Candida tropicalis        | -                |        |
| 5             | Candida parapsilosis      | -                |        |
| 6             | Candida krusei            | -                |        |
| 7             | Candida glabrata          | -                |        |
| 8             | Candida auris             | -                |        |
| 9             | Aspergillus fumigatus     | -                |        |
| 10            | Aspergillus flavus        | -                |        |
| 11            | Aspergillus niger         | -                |        |
| 12            | Aspergillus terreus       | -                |        |
| 13            | Aspergillus nidulans      | -                |        |
| 14            | Aspergillus calidoustu    | -                |        |
| 15            | Cryptococcus neoformans   | -                |        |
| 16            | Cryptococcus gattii       | -                |        |
| 17            | Histoplasma capsulatum    | -                |        |
| 18            | Lichtheimia corymbifera   | -                |        |
| 19            | Mucor pusillus            | -                |        |
| 20            | Trichosporon asahii       | -                |        |
| 21            | Pneumocystis jirovecii    | -                |        |
| 22            | Penicillium marneffeii    | -                |        |
| 23            | Negative control          | -                |        |
| 24            | Blank                     | -                |        |

## Results Suggest:

Candida albicans index was positive.

Detector \_\_\_\_\_ Auditor \_\_\_\_\_ Detection date 2023-06-25 20:54:28

# Respiratory fungal nucleic acid test results

Affiliated Hospital Of Guangdong medical university

## Basic sample information

|            |     |                    |            |              |                              |
|------------|-----|--------------------|------------|--------------|------------------------------|
| Name       |     | Sexuality          | Female     | Age          | 48 years old                 |
| Section    | ICU | Ward               |            | Bed Number   | J050                         |
| ID         |     | Clinical Diagnosis |            | Sample Types | bronchoalveolar lavage fluid |
| Test Items |     | Chip Number        | C010420162 |              | 2021012001                   |

## Detailed Results:

| Serial Number | Test Items                | Detected Results | Remark |
|---------------|---------------------------|------------------|--------|
| 1             | Positive external control | +                |        |
| 2             | Positive internal control | +                |        |
| 3             | Candida albicans          | -                |        |
| 4             | Candida tropicalis        | -                |        |
| 5             | Candida parapsilosis      | -                |        |
| 6             | Candida krusei            | -                |        |
| 7             | Candida glabrata          | -                |        |
| 8             | Candida auris             | -                |        |
| 9             | Aspergillus fumigatus     | -                |        |
| 10            | Aspergillus flavus        | -                |        |
| 11            | Aspergillus niger         | -                |        |
| 12            | Aspergillus terreus       | -                |        |
| 13            | Aspergillus nidulans      | -                |        |
| 14            | Aspergillus calidoustu    | -                |        |
| 15            | Cryptococcus neoformans   | -                |        |
| 16            | Cryptococcus gattii       | -                |        |
| 17            | Histoplasma capsulatum    | -                |        |
| 18            | Lichtheimia corymbifera   | -                |        |
| 19            | Mucor pusillus            | -                |        |
| 20            | Trichosporon asahii       | -                |        |
| 21            | Pneumocystis jirovecii    | -                |        |
| 22            | Penicillium marneffeii    | -                |        |
| 23            | Negative control          | -                |        |
| 24            | Blank                     | -                |        |

## Results Suggest:

No abnormality was found after detection.

Detector \_\_\_\_\_ Auditor \_\_\_\_\_ Detection date 2021-01-21 12:11:58

# Respiratory fungal nucleic acid test results

Affiliated Hospital Of Guangdong medical university

## Basic sample information

|            |     |                    |            |               |              |
|------------|-----|--------------------|------------|---------------|--------------|
| Name       |     | Sexuality          | Male       | Age           | 61 years old |
| Section    | ICU | Ward               |            | Bed Number    | 3001         |
| ID         |     | Clinical Diagnosis |            | Sample Types  | sputum       |
| Test Items |     | Chip Number        | C010420163 | Sample Number | 2021012101   |

## Detailed Results:

| Serial Number | Test Items                | Detected Results | Remark |
|---------------|---------------------------|------------------|--------|
| 1             | Positive external control | +                |        |
| 2             | Positive internal control | +                |        |
| 3             | Candida albicans          | -                |        |
| 4             | Candida tropicalis        | -                |        |
| 5             | Candida parapsilosis      | -                |        |
| 6             | Candida krusei            | -                |        |
| 7             | Candida glabrata          | -                |        |
| 8             | Candida auris             | -                |        |
| 9             | Aspergillus fumigatus     | -                |        |
| 10            | Aspergillus flavus        | -                |        |
| 11            | Aspergillus niger         | -                |        |
| 12            | Aspergillus terreus       | -                |        |
| 13            | Aspergillus nidulans      | -                |        |
| 14            | Aspergillus calidoustu    | -                |        |
| 15            | Cryptococcus neoformans   | -                |        |
| 16            | Cryptococcus gattii       | -                |        |
| 17            | Histoplasma capsulatum    | -                |        |
| 18            | Lichtheimia corymbifera   | -                |        |
| 19            | Mucor pusillus            | -                |        |
| 20            | Trichosporon asahii       | -                |        |
| 21            | Pneumocystis jirovecii    | -                |        |
| 22            | Penicillium marneffeii    | -                |        |
| 23            | Negative control          | -                |        |
| 24            | Blank                     | -                |        |

## Results Suggest:

No abnormality was found after detection.

Detector \_\_\_\_\_ Auditor \_\_\_\_\_ Detection date 2021-01-21 17:27:09

# Respiratory fungal nucleic acid test results

Affiliated Hospital Of Guangdong medical university

## Basic sample information

|            |     |                    |                 |               |              |
|------------|-----|--------------------|-----------------|---------------|--------------|
| Name       |     | Sexuality          | Female          | Age           | 70 years old |
| Section    | ICU | Ward               |                 | Bed Number    |              |
| ID         |     | Clinical Diagnosis |                 | Sample Types  | sputum       |
| Test Items |     | Chip Number        | ZJ-202011010228 | Sample Number | 2021012601   |

## Detailed Results:

| Serial Number | Test Items                | Detected Results | Remark |
|---------------|---------------------------|------------------|--------|
| 1             | Positive external control | +                |        |
| 2             | Positive internal control | +                |        |
| 3             | Candida albicans          | +                |        |
| 4             | Candida tropicalis        | -                |        |
| 5             | Candida parapsilosis      | -                |        |
| 6             | Candida krusei            | -                |        |
| 7             | Candida glabrata          | -                |        |
| 8             | Candida auris             | -                |        |
| 9             | Aspergillus fumigatus     | -                |        |
| 10            | Aspergillus flavus        | -                |        |
| 11            | Aspergillus niger         | -                |        |
| 12            | Aspergillus terreus       | -                |        |
| 13            | Aspergillus nidulans      | -                |        |
| 14            | Aspergillus calidoustu    | -                |        |
| 15            | Cryptococcus neoformans   | -                |        |
| 16            | Cryptococcus gattii       | -                |        |
| 17            | Histoplasma capsulatum    | -                |        |
| 18            | Lichtheimia corymbifera   | -                |        |
| 19            | Mucor pusillus            | -                |        |
| 20            | Trichosporon asahii       | -                |        |
| 21            | Pneumocystis jirovecii    | -                |        |
| 22            | Penicillium marneffeii    | -                |        |
| 23            | Negative control          | -                |        |
| 24            | Blank                     | -                |        |

## Results Suggest:

Candida albicans index was positive.

Detector \_\_\_\_\_ Auditor \_\_\_\_\_ Detection date 2021-02-02 18:07:31



# Respiratory fungal nucleic acid test results

Affiliated Hospital Of Guangdong medical university

## Basic sample information

|            |     |                    |            |               |              |
|------------|-----|--------------------|------------|---------------|--------------|
| Name       |     | Sexuality          | Male       | Age           | 89 years old |
| Section    | ICU | Ward               |            | Bed Number    | 3008         |
| ID         |     | Clinical Diagnosis |            | Sample Types  | sputum       |
| Test Items |     | Chip Number        | c010420167 | Sample Number | 2021012102   |

## Detailed Results:

| Serial Number | Test Items                | Detected Results | Remark |
|---------------|---------------------------|------------------|--------|
| 1             | Positive external control | +                |        |
| 2             | Positive internal control | +                |        |
| 3             | Candida albicans          | +                |        |
| 4             | Candida tropicalis        | -                |        |
| 5             | Candida parapsilosis      | -                |        |
| 6             | Candida krusei            | -                |        |
| 7             | Candida glabrata          | +                |        |
| 8             | Candida auris             | -                |        |
| 9             | Aspergillus fumigatus     | -                |        |
| 10            | Aspergillus flavus        | -                |        |
| 11            | Aspergillus niger         | -                |        |
| 12            | Aspergillus terreus       | -                |        |
| 13            | Aspergillus nidulans      | -                |        |
| 14            | Aspergillus calidoustu    | -                |        |
| 15            | Cryptococcus neoformans   | -                |        |
| 16            | Cryptococcus gattii       | -                |        |
| 17            | Histoplasma capsulatum    | -                |        |
| 18            | Lichtheimia corymbifera   | -                |        |
| 19            | Mucor pusillus            | -                |        |
| 20            | Trichosporon asahii       | -                |        |
| 21            | Pneumocystis jirovecii    | -                |        |
| 22            | Penicillium marneffeii    | -                |        |
| 23            | Negative control          | -                |        |
| 24            | Blank                     | -                |        |

## Results Suggest:

Candida albicans and Candida glabrata indexes were positive.

Detector \_\_\_\_\_ Auditor \_\_\_\_\_ Detection date 2021-01-30 18:52:31

# Respiratory fungal nucleic acid test results

Affiliated Hospital Of Guangdong medical university

## Basic sample information

|            |     |                    |            |               |              |
|------------|-----|--------------------|------------|---------------|--------------|
| Name       |     | Sexuality          | Male       | Age           | 48 years old |
| Section    | ICU | Ward               |            | Bed Number    | 3009         |
| ID         |     | Clinical Diagnosis |            | Sample Types  | sputum       |
| Test Items |     | Chip Number        | c010420168 | Sample Number | 2021012103   |

## Detailed Results:

| Serial Number | Test Items                | Detected Results | Remark |
|---------------|---------------------------|------------------|--------|
| 1             | Positive external control | +                |        |
| 2             | Positive internal control | +                |        |
| 3             | Candida albicans          | +                |        |
| 4             | Candida tropicalis        | -                |        |
| 5             | Candida parapsilosis      | -                |        |
| 6             | Candida krusei            | -                |        |
| 7             | Candida glabrata          | +                |        |
| 8             | Candida auris             | -                |        |
| 9             | Aspergillus fumigatus     | -                |        |
| 10            | Aspergillus flavus        | -                |        |
| 11            | Aspergillus niger         | -                |        |
| 12            | Aspergillus terreus       | -                |        |
| 13            | Aspergillus nidulans      | -                |        |
| 14            | Aspergillus calidoustu    | -                |        |
| 15            | Cryptococcus neoformans   | -                |        |
| 16            | Cryptococcus gattii       | -                |        |
| 17            | Histoplasma capsulatum    | -                |        |
| 18            | Lichtheimia corymbifera   | -                |        |
| 19            | Mucor pusillus            | -                |        |
| 20            | Trichosporon asahii       | -                |        |
| 21            | Pneumocystis jirovecii    | -                |        |
| 22            | Penicillium marneffeii    | -                |        |
| 23            | Negative control          | -                |        |
| 24            | Blank                     | -                |        |

## Results Suggest:

Candida albicans and Candida glabrata indexes were positive.

Detector \_\_\_\_\_ Auditor \_\_\_\_\_ Detection date 2021-01-30 20:22:52

# Respiratory fungal nucleic acid test results

Affiliated Hospital Of Guangdong medical university

## Basic sample information

|            |     |                    |            |               |              |
|------------|-----|--------------------|------------|---------------|--------------|
| Name       |     | Sexuality          | Female     | Age           | 79 years old |
| Section    | ICU | Ward               |            | Bed Number    | 3203         |
| ID         |     | Clinical Diagnosis |            | Sample Types  | sputum       |
| Test Items |     | Chip Number        | c010420166 | Sample Number | 2021012104   |

## Detailed Results:

| Serial Number | Test Items                | Detected Results | Remark |
|---------------|---------------------------|------------------|--------|
| 1             | Positive external control | +                |        |
| 2             | Positive internal control | +                |        |
| 3             | Candida albicans          | +                |        |
| 4             | Candida tropicalis        | -                |        |
| 5             | Candida parapsilosis      | -                |        |
| 6             | Candida krusei            | -                |        |
| 7             | Candida glabrata          | -                |        |
| 8             | Candida auris             | -                |        |
| 9             | Aspergillus fumigatus     | -                |        |
| 10            | Aspergillus flavus        | -                |        |
| 11            | Aspergillus niger         | -                |        |
| 12            | Aspergillus terreus       | -                |        |
| 13            | Aspergillus nidulans      | -                |        |
| 14            | Aspergillus calidoustu    | -                |        |
| 15            | Cryptococcus neoformans   | -                |        |
| 16            | Cryptococcus gattii       | -                |        |
| 17            | Histoplasma capsulatum    | -                |        |
| 18            | Lichtheimia corymbifera   | -                |        |
| 19            | Mucor pusillus            | -                |        |
| 20            | Trichosporon asahii       | -                |        |
| 21            | Pneumocystis jirovecii    | -                |        |
| 22            | Penicillium marneffeii    | -                |        |
| 23            | Negative control          | -                |        |
| 24            | Blank                     | -                |        |

## Results Suggest:

Candida albicans index was positive.

Detector \_\_\_\_\_ Auditor \_\_\_\_\_ Detection date 2021-01-30 23:46:16

# Respiratory fungal nucleic acid test results

Affiliated Hospital Of Guangdong medical university

## Basic sample information

|            |     |                    |            |               |              |
|------------|-----|--------------------|------------|---------------|--------------|
| Name       |     | Sexuality          | Male       | Age           | 56 years old |
| Section    | ICU | Ward               |            | Bed Number    | 206          |
| ID         |     | Clinical Diagnosis |            | Sample Types  | sputum       |
| Test Items |     | Chip Number        | c020420001 | Sample Number | 2021012105   |

## Detailed Results:

| Serial Number | Test Items                | Detected Results | Remark |
|---------------|---------------------------|------------------|--------|
| 1             | Positive external control | +                |        |
| 2             | Positive internal control | +                |        |
| 3             | Candida albicans          | -                |        |
| 4             | Candida tropicalis        | -                |        |
| 5             | Candida parapsilosis      | -                |        |
| 6             | Candida krusei            | -                |        |
| 7             | Candida glabrata          | -                |        |
| 8             | Candida auris             | -                |        |
| 9             | Aspergillus fumigatus     | -                |        |
| 10            | Aspergillus flavus        | -                |        |
| 11            | Aspergillus niger         | -                |        |
| 12            | Aspergillus terreus       | -                |        |
| 13            | Aspergillus nidulans      | -                |        |
| 14            | Aspergillus calidoustu    | -                |        |
| 15            | Cryptococcus neoformans   | -                |        |
| 16            | Cryptococcus gattii       | -                |        |
| 17            | Histoplasma capsulatum    | -                |        |
| 18            | Lichtheimia corymbifera   | -                |        |
| 19            | Mucor pusillus            | -                |        |
| 20            | Trichosporon asahii       | -                |        |
| 21            | Pneumocystis jirovecii    | -                |        |
| 22            | Penicillium marneffeii    | -                |        |
| 23            | Negative control          | -                |        |
| 24            | Blank                     | -                |        |

## Results Suggest:

No abnormality was found after detection.

Detector \_\_\_\_\_ Auditor \_\_\_\_\_ Detection date 2021-01-30 21:34:37

# Respiratory fungal nucleic acid test results

Affiliated Hospital Of Guangdong medical university

## Basic sample information

|            |      |                    |            |               |              |
|------------|------|--------------------|------------|---------------|--------------|
| Name       |      | Sexuality          | Male       | Age           | 36 years old |
| Section    | EICU | Ward               |            | Bed Number    | 1            |
| ID         |      | Clinical Diagnosis |            | Sample Types  | sputum       |
| Test Items |      | Chip Number        | C020420002 | Sample Number | 20210201001  |

## Detailed Results:

| Serial Number | Test Items                | Detected Results | Remark |
|---------------|---------------------------|------------------|--------|
| 1             | Positive external control | +                |        |
| 2             | Positive internal control | +                |        |
| 3             | Candida albicans          | +                |        |
| 4             | Candida tropicalis        | +                |        |
| 5             | Candida parapsilosis      | -                |        |
| 6             | Candida krusei            | -                |        |
| 7             | Candida glabrata          | -                |        |
| 8             | Candida auris             | -                |        |
| 9             | Aspergillus fumigatus     | -                |        |
| 10            | Aspergillus flavus        | -                |        |
| 11            | Aspergillus niger         | -                |        |
| 12            | Aspergillus terreus       | +                |        |
| 13            | Aspergillus nidulans      | -                |        |
| 14            | Aspergillus calidoustu    | -                |        |
| 15            | Cryptococcus neoformans   | -                |        |
| 16            | Cryptococcus gattii       | -                |        |
| 17            | Histoplasma capsulatum    | -                |        |
| 18            | Lichtheimia corymbifera   | -                |        |
| 19            | Mucor pusillus            | -                |        |
| 20            | Trichosporon asahii       | -                |        |
| 21            | Pneumocystis jirovecii    | -                |        |
| 22            | Penicillium marneffeii    | -                |        |
| 23            | Negative control          | -                |        |
| 24            | Blank                     | -                |        |

## Results Suggest:

Candida albicans, Candida tropicalis and Aspergillus terreus indexes were positive.

Detector \_\_\_\_\_ Auditor \_\_\_\_\_ Detection date 2021-02-01 16:19:43

# Respiratory fungal nucleic acid test results

Affiliated Hospital Of Guangdong medical university

## Basic sample information

|            |      |                    |            |               |              |
|------------|------|--------------------|------------|---------------|--------------|
| Name       |      | Sexuality          | Female     | Age           | 14 years old |
| Section    | EICU | Ward               |            | Bed Number    | 2            |
| ID         |      | Clinical Diagnosis |            | Sample Types  | sputum       |
| Test Items |      | Chip Number        | C020420003 | Sample Number | 20210201002  |

## Detailed Results:

| Serial Number | Test Items                | Detected Results | Remark |
|---------------|---------------------------|------------------|--------|
| 1             | Positive external control | +                |        |
| 2             | Positive internal control | +                |        |
| 3             | Candida albicans          | -                |        |
| 4             | Candida tropicalis        | +                |        |
| 5             | Candida parapsilosis      | -                |        |
| 6             | Candida krusei            | -                |        |
| 7             | Candida glabrata          | -                |        |
| 8             | Candida auris             | -                |        |
| 9             | Aspergillus fumigatus     | -                |        |
| 10            | Aspergillus flavus        | -                |        |
| 11            | Aspergillus niger         | -                |        |
| 12            | Aspergillus terreus       | -                |        |
| 13            | Aspergillus nidulans      | -                |        |
| 14            | Aspergillus calidoustu    | -                |        |
| 15            | Cryptococcus neoformans   | -                |        |
| 16            | Cryptococcus gattii       | -                |        |
| 17            | Histoplasma capsulatum    | -                |        |
| 18            | Lichtheimia corymbifera   | -                |        |
| 19            | Mucor pusillus            | -                |        |
| 20            | Trichosporon asahii       | -                |        |
| 21            | Pneumocystis jirovecii    | -                |        |
| 22            | Penicillium marneffeii    | -                |        |
| 23            | Negative control          | -                |        |
| 24            | Blank                     | -                |        |

## Results Suggest:

Candida tropicalis index was positive.

Detector \_\_\_\_\_ Auditor \_\_\_\_\_ Detection date 2021-02-01 17:17:13

# Respiratory fungal nucleic acid test results

Affiliated Hospital Of Guangdong medical university

## Basic sample information

|            |      |                    |            |               |              |
|------------|------|--------------------|------------|---------------|--------------|
| Name       |      | Sexuality          | Male       | Age           | 63 years old |
| Section    | EICU | Ward               |            | Bed Number    | 3            |
| ID         |      | Clinical Diagnosis |            | Sample Types  | sputum       |
| Test Items |      | Chip Number        | C020420004 | Sample Number | 20210201003  |

## Detailed Results:

| Serial Number | Test Items                | Detected Results | Remark |
|---------------|---------------------------|------------------|--------|
| 1             | Positive external control | +                |        |
| 2             | Positive internal control | +                |        |
| 3             | Candida albicans          | +                |        |
| 4             | Candida tropicalis        | +                |        |
| 5             | Candida parapsilosis      | -                |        |
| 6             | Candida krusei            | -                |        |
| 7             | Candida glabrata          | -                |        |
| 8             | Candida auris             | -                |        |
| 9             | Aspergillus fumigatus     | -                |        |
| 10            | Aspergillus flavus        | -                |        |
| 11            | Aspergillus niger         | -                |        |
| 12            | Aspergillus terreus       | -                |        |
| 13            | Aspergillus nidulans      | -                |        |
| 14            | Aspergillus calidoustu    | -                |        |
| 15            | Cryptococcus neoformans   | -                |        |
| 16            | Cryptococcus gattii       | -                |        |
| 17            | Histoplasma capsulatum    | -                |        |
| 18            | Lichtheimia corymbifera   | -                |        |
| 19            | Mucor pusillus            | -                |        |
| 20            | Trichosporon asahii       | -                |        |
| 21            | Pneumocystis jirovecii    | -                |        |
| 22            | Penicillium marneffeii    | -                |        |
| 23            | Negative control          | -                |        |
| 24            | Blank                     | -                |        |

## Results Suggest:

Candida albicans and Candida tropicalis indexes were positive.

Detector \_\_\_\_\_ Auditor \_\_\_\_\_ Detection date 2021-02-01 18:18:09

# Respiratory fungal nucleic acid test results

Affiliated Hospital Of Guangdong medical university

## Basic sample information

|            |      |                    |                 |               |              |
|------------|------|--------------------|-----------------|---------------|--------------|
| Name       |      | Sexuality          | Male            | Age           | 39 years old |
| Section    | EICU | Ward               |                 | Bed Number    | 4            |
| ID         |      | Clinical Diagnosis |                 | Sample Types  | sputum       |
| Test Items |      | Chip Number        | ZJ-202011010239 | Sample Number | 2021020104   |

## Detailed Results:

| Serial Number | Test Items                | Detected Results | Remark |
|---------------|---------------------------|------------------|--------|
| 1             | Positive external control | +                |        |
| 2             | Positive internal control | +                |        |
| 3             | Candida albicans          | -                |        |
| 4             | Candida tropicalis        | -                |        |
| 5             | Candida parapsilosis      | -                |        |
| 6             | Candida krusei            | -                |        |
| 7             | Candida glabrata          | +                |        |
| 8             | Candida auris             | -                |        |
| 9             | Aspergillus fumigatus     | -                |        |
| 10            | Aspergillus flavus        | -                |        |
| 11            | Aspergillus niger         | -                |        |
| 12            | Aspergillus terreus       | -                |        |
| 13            | Aspergillus nidulans      | -                |        |
| 14            | Aspergillus calidoustu    | -                |        |
| 15            | Cryptococcus neoformans   | -                |        |
| 16            | Cryptococcus gattii       | -                |        |
| 17            | Histoplasma capsulatum    | -                |        |
| 18            | Lichtheimia corymbifera   | -                |        |
| 19            | Mucor pusillus            | -                |        |
| 20            | Trichosporon asahii       | -                |        |
| 21            | Pneumocystis jirovecii    | -                |        |
| 22            | Penicillium marneffeii    | -                |        |
| 23            | Negative control          | -                |        |
| 24            | Blank                     | -                |        |

## Results Suggest:

Candida glabrata index was positive.

Detector \_\_\_\_\_ Auditor \_\_\_\_\_ Detection date 2021-02-02 09:22:35



# Respiratory fungal nucleic acid test results

Affiliated Hospital Of Guangdong medical university

## Basic sample information

|            |     |                    |                 |               |              |
|------------|-----|--------------------|-----------------|---------------|--------------|
| Name       |     | Sexuality          | Male            | Age           | 53 years old |
| Section    | ICU | Ward               |                 | Bed Number    | 6            |
| ID         |     | Clinical Diagnosis |                 | Sample Types  | sputum       |
| Test Items |     | Chip Number        | ZJ-202011010227 | Sample Number | 2021020108   |

## Detailed Results:

| Serial Number | Test Items                | Detected Results | Remark |
|---------------|---------------------------|------------------|--------|
| 1             | Positive external control | +                |        |
| 2             | Positive internal control | +                |        |
| 3             | Candida albicans          | +                |        |
| 4             | Candida tropicalis        | -                |        |
| 5             | Candida parapsilosis      | -                |        |
| 6             | Candida krusei            | -                |        |
| 7             | Candida glabrata          | -                |        |
| 8             | Candida auris             | -                |        |
| 9             | Aspergillus fumigatus     | -                |        |
| 10            | Aspergillus flavus        | -                |        |
| 11            | Aspergillus niger         | -                |        |
| 12            | Aspergillus terreus       | -                |        |
| 13            | Aspergillus nidulans      | -                |        |
| 14            | Aspergillus calidoustu    | -                |        |
| 15            | Cryptococcus neoformans   | -                |        |
| 16            | Cryptococcus gattii       | -                |        |
| 17            | Histoplasma capsulatum    | -                |        |
| 18            | Lichtheimia corymbifera   | -                |        |
| 19            | Mucor pusillus            | -                |        |
| 20            | Trichosporon asahii       | -                |        |
| 21            | Pneumocystis jirovecii    | -                |        |
| 22            | Penicillium marneffeii    | -                |        |
| 23            | Negative control          | -                |        |
| 24            | Blank                     | -                |        |

## Results Suggest:

Candida albicans index was positive.

Detector \_\_\_\_\_ Auditor \_\_\_\_\_ Detection date 2021-02-02 10:17:23

# Respiratory fungal nucleic acid test results

Affiliated Hospital Of Guangdong medical university

## Basic sample information

|            |     |                    |                 |               |              |
|------------|-----|--------------------|-----------------|---------------|--------------|
| Name       |     | Sexuality          | Male            | Age           | 64 years old |
| Section    | ICU | Ward               |                 | Bed Number    | 12           |
| ID         |     | Clinical Diagnosis |                 | Sample Types  | sputum       |
| Test Items |     | Chip Number        | ZJ-202011010232 | Sample Number | 2021020107   |

## Detailed Results:

| Serial Number | Test Items                | Detected Results | Remark |
|---------------|---------------------------|------------------|--------|
| 1             | Positive external control | +                |        |
| 2             | Positive internal control | +                |        |
| 3             | Candida albicans          | -                |        |
| 4             | Candida tropicalis        | -                |        |
| 5             | Candida parapsilosis      | -                |        |
| 6             | Candida krusei            | -                |        |
| 7             | Candida glabrata          | -                |        |
| 8             | Candida auris             | -                |        |
| 9             | Aspergillus fumigatus     | -                |        |
| 10            | Aspergillus flavus        | -                |        |
| 11            | Aspergillus niger         | -                |        |
| 12            | Aspergillus terreus       | -                |        |
| 13            | Aspergillus nidulans      | -                |        |
| 14            | Aspergillus calidoustu    | -                |        |
| 15            | Cryptococcus neoformans   | -                |        |
| 16            | Cryptococcus gattii       | -                |        |
| 17            | Histoplasma capsulatum    | -                |        |
| 18            | Lichtheimia corymbifera   | -                |        |
| 19            | Mucor pusillus            | -                |        |
| 20            | Trichosporon asahii       | -                |        |
| 21            | Pneumocystis jirovecii    | -                |        |
| 22            | Penicillium marneffeii    | -                |        |
| 23            | Negative control          | -                |        |
| 24            | Blank                     | -                |        |

## Results Suggest:

No abnormality was found after detection.

Detector \_\_\_\_\_ Auditor \_\_\_\_\_ Detection date 2021-02-02 16:08:55

# Respiratory fungal nucleic acid test results

Affiliated Hospital Of Guangdong medical university

## Basic sample information

|            |     |                    |                 |               |              |
|------------|-----|--------------------|-----------------|---------------|--------------|
| Name       |     | Sexuality          | Female          | Age           | 55 years old |
| Section    | ICU | Ward               |                 | Bed Number    | 208          |
| ID         |     | Clinical Diagnosis |                 | Sample Types  | sputum       |
| Test Items |     | Chip Number        | ZJ-202011010229 | Sample Number | 20210202004  |

## Detailed Results:

| Serial Number | Test Items                | Detected Results | Remark |
|---------------|---------------------------|------------------|--------|
| 1             | Positive external control | +                |        |
| 2             | Positive internal control | +                |        |
| 3             | Candida albicans          | +                |        |
| 4             | Candida tropicalis        | -                |        |
| 5             | Candida parapsilosis      | -                |        |
| 6             | Candida krusei            | -                |        |
| 7             | Candida glabrata          | -                |        |
| 8             | Candida auris             | -                |        |
| 9             | Aspergillus fumigatus     | -                |        |
| 10            | Aspergillus flavus        | -                |        |
| 11            | Aspergillus niger         | -                |        |
| 12            | Aspergillus terreus       | -                |        |
| 13            | Aspergillus nidulans      | -                |        |
| 14            | Aspergillus calidoustu    | -                |        |
| 15            | Cryptococcus neoformans   | -                |        |
| 16            | Cryptococcus gattii       | -                |        |
| 17            | Histoplasma capsulatum    | -                |        |
| 18            | Lichtheimia corymbifera   | -                |        |
| 19            | Mucor pusillus            | -                |        |
| 20            | Trichosporon asahii       | -                |        |
| 21            | Pneumocystis jirovecii    | -                |        |
| 22            | Penicillium marneffeii    | -                |        |
| 23            | Negative control          | -                |        |
| 24            | Blank                     | -                |        |

## Results Suggest:

Candida albicans index was positive.

Detector \_\_\_\_\_ Auditor \_\_\_\_\_ Detection date 2021-02-02 12:57:22

# Respiratory fungal nucleic acid test results

Affiliated Hospital Of Guangdong medical university

## Basic sample information

|            |     |                    |                 |               |              |
|------------|-----|--------------------|-----------------|---------------|--------------|
| Name       |     | Sexuality          | Male            | Age           | 47 years old |
| Section    | ICU | Ward               |                 | Bed Number    | 302          |
| ID         |     | Clinical Diagnosis |                 | Sample Types  | sputum       |
| Test Items |     | Chip Number        | ZJ-202011010230 | Sample Number | 20210202005  |

## Detailed Results:

| Serial Number | Test Items                | Detected Results | Remark |
|---------------|---------------------------|------------------|--------|
| 1             | Positive external control | +                |        |
| 2             | Positive internal control | +                |        |
| 3             | Candida albicans          | -                |        |
| 4             | Candida tropicalis        | -                |        |
| 5             | Candida parapsilosis      | -                |        |
| 6             | Candida krusei            | -                |        |
| 7             | Candida glabrata          | -                |        |
| 8             | Candida auris             | -                |        |
| 9             | Aspergillus fumigatus     | -                |        |
| 10            | Aspergillus flavus        | -                |        |
| 11            | Aspergillus niger         | -                |        |
| 12            | Aspergillus terreus       | -                |        |
| 13            | Aspergillus nidulans      | -                |        |
| 14            | Aspergillus calidoustu    | -                |        |
| 15            | Cryptococcus neoformans   | -                |        |
| 16            | Cryptococcus gattii       | -                |        |
| 17            | Histoplasma capsulatum    | -                |        |
| 18            | Lichtheimia corymbifera   | -                |        |
| 19            | Mucor pusillus            | -                |        |
| 20            | Trichosporon asahii       | -                |        |
| 21            | Pneumocystis jirovecii    | -                |        |
| 22            | Penicillium marneffeii    | -                |        |
| 23            | Negative control          | -                |        |
| 24            | Blank                     | -                |        |

## Results Suggest:

No abnormality was found after detection.

Detector \_\_\_\_\_ Auditor \_\_\_\_\_ Detection date 2021-02-02 14:15:20

# Respiratory fungal nucleic acid test results

Affiliated Hospital Of Guangdong medical university

## Basic sample information

|            |     |                    |                 |               |              |
|------------|-----|--------------------|-----------------|---------------|--------------|
| Name       |     | Sexuality          | Female          | Age           | 69 years old |
| Section    | ICU | Ward               |                 | Bed Number    | 308          |
| ID         |     | Clinical Diagnosis |                 | Sample Types  | sputum       |
| Test Items |     | Chip Number        | ZJ-202011010231 | Sample Number | 2021020105   |

## Detailed Results:

| Serial Number | Test Items                | Detected Results | Remark |
|---------------|---------------------------|------------------|--------|
| 1             | Positive external control | +                |        |
| 2             | Positive internal control | +                |        |
| 3             | Candida albicans          | +                |        |
| 4             | Candida tropicalis        | -                |        |
| 5             | Candida parapsilosis      | -                |        |
| 6             | Candida krusei            | -                |        |
| 7             | Candida glabrata          | -                |        |
| 8             | Candida auris             | -                |        |
| 9             | Aspergillus fumigatus     | -                |        |
| 10            | Aspergillus flavus        | -                |        |
| 11            | Aspergillus niger         | -                |        |
| 12            | Aspergillus terreus       | -                |        |
| 13            | Aspergillus nidulans      | -                |        |
| 14            | Aspergillus calidoustu    | -                |        |
| 15            | Cryptococcus neoformans   | -                |        |
| 16            | Cryptococcus gattii       | -                |        |
| 17            | Histoplasma capsulatum    | -                |        |
| 18            | Lichtheimia corymbifera   | -                |        |
| 19            | Mucor pusillus            | -                |        |
| 20            | Trichosporon asahii       | -                |        |
| 21            | Pneumocystis jirovecii    | -                |        |
| 22            | Penicillium marneffeii    | -                |        |
| 23            | Negative control          | -                |        |
| 24            | Blank                     | -                |        |

## Results Suggest:

Candida albicans index was positive.

Detector \_\_\_\_\_ Auditor \_\_\_\_\_ Detection date 2021-02-02 15:13:00

# Respiratory fungal nucleic acid test results

Affiliated Hospital Of Guangdong medical university

## Basic sample information

|            |                                    |                    |                 |               |              |
|------------|------------------------------------|--------------------|-----------------|---------------|--------------|
| Name       |                                    | Sexuality          | Male            | Age           | 69 years old |
| Section    | department of respiratory medicine | Ward               |                 | Bed Number    | 3001         |
| ID         |                                    | Clinical Diagnosis |                 | Sample Types  | sputum       |
| Test Items |                                    | Chip Number        | ZJ-202011010234 | Sample Number | 2021020301   |

## Detailed Results:

| Serial Number | Test Items                | Detected Results | Remark |
|---------------|---------------------------|------------------|--------|
| 1             | Positive external control | +                |        |
| 2             | Positive internal control | +                |        |
| 3             | Candida albicans          | +                |        |
| 4             | Candida tropicalis        | -                |        |
| 5             | Candida parapsilosis      | -                |        |
| 6             | Candida krusei            | -                |        |
| 7             | Candida glabrata          | -                |        |
| 8             | Candida auris             | -                |        |
| 9             | Aspergillus fumigatus     | -                |        |
| 10            | Aspergillus flavus        | -                |        |
| 11            | Aspergillus niger         | -                |        |
| 12            | Aspergillus terreus       | -                |        |
| 13            | Aspergillus nidulans      | -                |        |
| 14            | Aspergillus calidoustu    | -                |        |
| 15            | Cryptococcus neoformans   | -                |        |
| 16            | Cryptococcus gattii       | -                |        |
| 17            | Histoplasma capsulatum    | -                |        |
| 18            | Lichtheimia corymbifera   | -                |        |
| 19            | Mucor pusillus            | -                |        |
| 20            | Trichosporon asahii       | -                |        |
| 21            | Pneumocystis jirovecii    | -                |        |
| 22            | Penicillium marneffeii    | -                |        |
| 23            | Negative control          | -                |        |
| 24            | Blank                     | -                |        |

## Results Suggest:

Candida albicans index was positive.

Detector \_\_\_\_\_ Auditor \_\_\_\_\_ Detection date 2021-02-03 17:35:56

# Respiratory fungal nucleic acid test results

Affiliated Hospital Of Guangdong medical university

## Basic sample information

|            |                                    |                    |                 |               |              |
|------------|------------------------------------|--------------------|-----------------|---------------|--------------|
| Name       |                                    | Sexuality          | Male            | Age           | 43 years old |
| Section    | department of respiratory medicine | Ward               |                 | Bed Number    | 3009         |
| ID         |                                    | Clinical Diagnosis |                 | Sample Types  | sputum       |
| Test Items |                                    | Chip Number        | ZJ-202011010235 | Sample Number | 2021020302   |

## Detailed Results:

| Serial Number | Test Items                | Detected Results | Remark |
|---------------|---------------------------|------------------|--------|
| 1             | Positive external control | +                |        |
| 2             | Positive internal control | +                |        |
| 3             | Candida albicans          | -                |        |
| 4             | Candida tropicalis        | -                |        |
| 5             | Candida parapsilosis      | -                |        |
| 6             | Candida krusei            | -                |        |
| 7             | Candida glabrata          | +                |        |
| 8             | Candida auris             | -                |        |
| 9             | Aspergillus fumigatus     | -                |        |
| 10            | Aspergillus flavus        | -                |        |
| 11            | Aspergillus niger         | -                |        |
| 12            | Aspergillus terreus       | -                |        |
| 13            | Aspergillus nidulans      | -                |        |
| 14            | Aspergillus calidoustu    | -                |        |
| 15            | Cryptococcus neoformans   | -                |        |
| 16            | Cryptococcus gattii       | -                |        |
| 17            | Histoplasma capsulatum    | -                |        |
| 18            | Lichtheimia corymbifera   | -                |        |
| 19            | Mucor pusillus            | -                |        |
| 20            | Trichosporon asahii       | -                |        |
| 21            | Pneumocystis jirovecii    | -                |        |
| 22            | Penicillium marneffeii    | -                |        |
| 23            | Negative control          | -                |        |
| 24            | Blank                     | -                |        |

## Results Suggest:

Candida glabrata index was positive.

Detector \_\_\_\_\_ Auditor \_\_\_\_\_ Detection date 2021-02-03 17:43:43

# Respiratory fungal nucleic acid test results

Affiliated Hospital Of Guangdong medical university

## Basic sample information

|            |     |                    |                 |               |              |
|------------|-----|--------------------|-----------------|---------------|--------------|
| Name       |     | Sexuality          | Female          | Age           | 54 years old |
| Section    | ICU | Ward               |                 | Bed Number    | 4            |
| ID         |     | Clinical Diagnosis |                 | Sample Types  | sputum       |
| Test Items |     | Chip Number        | ZJ-202011010238 | Sample Number | 2021020501   |

## Detailed Results:

| Serial Number | Test Items                | Detected Results | Remark |
|---------------|---------------------------|------------------|--------|
| 1             | Positive external control | +                |        |
| 2             | Positive internal control | +                |        |
| 3             | Candida albicans          | -                |        |
| 4             | Candida tropicalis        | -                |        |
| 5             | Candida parapsilosis      | -                |        |
| 6             | Candida krusei            | -                |        |
| 7             | Candida glabrata          | -                |        |
| 8             | Candida auris             | -                |        |
| 9             | Aspergillus fumigatus     | -                |        |
| 10            | Aspergillus flavus        | -                |        |
| 11            | Aspergillus niger         | -                |        |
| 12            | Aspergillus terreus       | -                |        |
| 13            | Aspergillus nidulans      | -                |        |
| 14            | Aspergillus calidoustu    | -                |        |
| 15            | Cryptococcus neoformans   | -                |        |
| 16            | Cryptococcus gattii       | -                |        |
| 17            | Histoplasma capsulatum    | -                |        |
| 18            | Lichtheimia corymbifera   | -                |        |
| 19            | Mucor pusillus            | -                |        |
| 20            | Trichosporon asahii       | -                |        |
| 21            | Pneumocystis jirovecii    | -                |        |
| 22            | Penicillium marneffeii    | -                |        |
| 23            | Negative control          | -                |        |
| 24            | Blank                     | -                |        |

## Results Suggest:

No abnormality was found after detection.

Detector \_\_\_\_\_ Auditor \_\_\_\_\_ Detection date 2021-02-07 09:05:38



# Respiratory fungal nucleic acid test results

Affiliated Hospital Of Guangdong medical university

## Basic sample information

|            |     |                    |                 |               |              |
|------------|-----|--------------------|-----------------|---------------|--------------|
| Name       |     | Sexuality          | Male            | Age           | 71 years old |
| Section    | ICU |                    |                 | Bed Number    | 9            |
| ID         |     | Clinical Diagnosis |                 | Sample Types  | sputum       |
| Test Items |     | Chip Number        | ZJ-202011010237 | Sample Number | 2021020502   |

## Detailed Results:

| Serial Number | Test Items                | Detected Results | Remark |
|---------------|---------------------------|------------------|--------|
| 1             | Positive external control | +                |        |
| 2             | Positive internal control | +                |        |
| 3             | Candida albicans          | +                |        |
| 4             | Candida tropicalis        | -                |        |
| 5             | Candida parapsilosis      | -                |        |
| 6             | Candida krusei            | -                |        |
| 7             | Candida glabrata          | +                |        |
| 8             | Candida auris             | -                |        |
| 9             | Aspergillus fumigatus     | -                |        |
| 10            | Aspergillus flavus        | -                |        |
| 11            | Aspergillus niger         | -                |        |
| 12            | Aspergillus terreus       | -                |        |
| 13            | Aspergillus nidulans      | -                |        |
| 14            | Aspergillus calidoustu    | -                |        |
| 15            | Cryptococcus neoformans   | -                |        |
| 16            | Cryptococcus gattii       | -                |        |
| 17            | Histoplasma capsulatum    | -                |        |
| 18            | Lichtheimia corymbifera   | -                |        |
| 19            | Mucor pusillus            | -                |        |
| 20            | Trichosporon asahii       | -                |        |
| 21            | Pneumocystis jirovecii    | -                |        |
| 22            | Penicillium marneffeii    | -                |        |
| 23            | Negative control          | -                |        |
| 24            | Blank                     | -                |        |

## Results Suggest:

Candida albicans and Candida glabrata indexes were positive.

Detector \_\_\_\_\_ Auditor \_\_\_\_\_ Detection date 2021-02-05 16:24:45

# Respiratory fungal nucleic acid test results

Affiliated Hospital Of Guangdong Medical University

## Basic sample information

|            |     |                    |                 |               |              |
|------------|-----|--------------------|-----------------|---------------|--------------|
| Name       |     | Sexuality          | Male            | Age           | 79 years old |
| Section    | ICU | Ward               |                 | Bed Number    | 10           |
| ID         |     | Clinical Diagnosis |                 | Sample Types  | sputum       |
| Test Items |     | Chip Number        | ZJ-202011010236 | Sample Number | 2021020503   |

## Detailed Results:

| Serial Number | Test Items                | Detected Results | Remark |
|---------------|---------------------------|------------------|--------|
| 1             | Positive external control | +                |        |
| 2             | Positive internal control | +                |        |
| 3             | Candida albicans          | +                |        |
| 4             | Candida tropicalis        | -                |        |
| 5             | Candida parapsilosis      | -                |        |
| 6             | Candida krusei            | -                |        |
| 7             | Candida glabrata          | +                |        |
| 8             | Candida auris             | -                |        |
| 9             | Aspergillus fumigatus     | -                |        |
| 10            | Aspergillus flavus        | -                |        |
| 11            | Aspergillus niger         | -                |        |
| 12            | Aspergillus terreus       | -                |        |
| 13            | Aspergillus nidulans      | -                |        |
| 14            | Aspergillus calidoustu    | -                |        |
| 15            | Cryptococcus neoformans   | -                |        |
| 16            | Cryptococcus gattii       | -                |        |
| 17            | Histoplasma capsulatum    | -                |        |
| 18            | Lichtheimia corymbifera   | -                |        |
| 19            | Mucor pusillus            | -                |        |
| 20            | Trichosporon asahii       | -                |        |
| 21            | Pneumocystis jirovecii    | -                |        |
| 22            | Penicillium marneffeii    | -                |        |
| 23            | Negative control          | -                |        |
| 24            | Blank                     | -                |        |

## Results Suggest:

Candida albicans and Candida glabrata indexes were positive.

Detector \_\_\_\_\_ Auditor \_\_\_\_\_ Detection date 2021-02-05 17:30:38

# Respiratory fungal nucleic acid test results

Affiliated Hospital Of Guangdong Medical University

## Basic sample information

|            |     |                    |                 |               |              |
|------------|-----|--------------------|-----------------|---------------|--------------|
| Name       |     | Sexuality          | Female          | Age           | 57 years old |
| Section    | ICU | Ward               |                 | Bed Number    | 302          |
| ID         |     | Clinical Diagnosis |                 | Sample Types  | sputum       |
| Test Items |     | Chip Number        | ZJ-202011010449 | Sample Number | 2021020504   |

## Detailed Results:

| Serial Number | Test Items                | Detected Results | Remark |
|---------------|---------------------------|------------------|--------|
| 1             | Positive external control | +                |        |
| 2             | Positive internal control | +                |        |
| 3             | Candida albicans          | -                |        |
| 4             | Candida tropicalis        | -                |        |
| 5             | Candida parapsilosis      | -                |        |
| 6             | Candida krusei            | -                |        |
| 7             | Candida glabrata          | -                |        |
| 8             | Candida auris             | -                |        |
| 9             | Aspergillus fumigatus     | -                |        |
| 10            | Aspergillus flavus        | -                |        |
| 11            | Aspergillus niger         | -                |        |
| 12            | Aspergillus terreus       | -                |        |
| 13            | Aspergillus nidulans      | -                |        |
| 14            | Aspergillus calidoustu    | -                |        |
| 15            | Cryptococcus neoformans   | -                |        |
| 16            | Cryptococcus gattii       | -                |        |
| 17            | Histoplasma capsulatum    | -                |        |
| 18            | Lichtheimia corymbifera   | -                |        |
| 19            | Mucor pusillus            | -                |        |
| 20            | Trichosporon asahii       | -                |        |
| 21            | Pneumocystis jirovecii    | -                |        |
| 22            | Penicillium marneffeii    | -                |        |
| 23            | Negative control          | -                |        |
| 24            | Blank                     | -                |        |

## Results Suggest:

No abnormality was found after detection.

Detector \_\_\_\_\_ Auditor \_\_\_\_\_ Detection date 2021-02-05 18:28:02

# Respiratory fungal nucleic acid test results

Affiliated Hospital Of Guangdong Medical University

## Basic sample information

|            |     |                    |                 |               |              |
|------------|-----|--------------------|-----------------|---------------|--------------|
| Name       |     | Sexuality          | Male            | Age           | 59 years old |
| Section    | ICU | Ward               |                 | Bed Number    | 307          |
| ID         |     | Clinical Diagnosis |                 | Sample Types  | sputum       |
| Test Items |     | Chip Number        | ZJ-202011010450 | Sample Number | 2021020505   |

## Detailed Results:

| Serial Number | Test Items                | Detected Results | Remark |
|---------------|---------------------------|------------------|--------|
| 1             | Positive external control | +                |        |
| 2             | Positive internal control | +                |        |
| 3             | Candida albicans          | -                |        |
| 4             | Candida tropicalis        | -                |        |
| 5             | Candida parapsilosis      | -                |        |
| 6             | Candida krusei            | -                |        |
| 7             | Candida glabrata          | -                |        |
| 8             | Candida auris             | -                |        |
| 9             | Aspergillus fumigatus     | -                |        |
| 10            | Aspergillus flavus        | -                |        |
| 11            | Aspergillus niger         | -                |        |
| 12            | Aspergillus terreus       | -                |        |
| 13            | Aspergillus nidulans      | -                |        |
| 14            | Aspergillus calidoustu    | -                |        |
| 15            | Cryptococcus neoformans   | -                |        |
| 16            | Cryptococcus gattii       | -                |        |
| 17            | Histoplasma capsulatum    | -                |        |
| 18            | Lichtheimia corymbifera   | -                |        |
| 19            | Mucor pusillus            | -                |        |
| 20            | Trichosporon asahii       | -                |        |
| 21            | Pneumocystis jirovecii    | -                |        |
| 22            | Penicillium marneffeii    | -                |        |
| 23            | Negative control          | -                |        |
| 24            | Blank                     | -                |        |

## Results Suggest:

No abnormality was found after detection.

Detector \_\_\_\_\_ Auditor \_\_\_\_\_ Detection date 2021-02-05 19:28:02

# Respiratory fungal nucleic acid test results

Affiliated Hospital Of Guangdong Medical University

## Basic sample information

|            |     |                    |                 |               |              |
|------------|-----|--------------------|-----------------|---------------|--------------|
| Name       |     | Sexuality          | Male            | Age           | 66 years old |
| Section    | ICU | Ward               |                 | Bed Number    | 1            |
| ID         |     | Clinical Diagnosis |                 | Sample Types  | sputum       |
| Test Items |     | Chip Number        | ZJ-202011010451 | Sample Number | 2021020801   |

## Detailed Results:

| Serial Number | Test Items                | Detected Results | Remark |
|---------------|---------------------------|------------------|--------|
| 1             | Positive external control | +                |        |
| 2             | Positive internal control | +                |        |
| 3             | Candida albicans          | +                |        |
| 4             | Candida tropicalis        | -                |        |
| 5             | Candida parapsilosis      | -                |        |
| 6             | Candida krusei            | -                |        |
| 7             | Candida glabrata          | +                |        |
| 8             | Candida auris             | -                |        |
| 9             | Aspergillus fumigatus     | -                |        |
| 10            | Aspergillus flavus        | -                |        |
| 11            | Aspergillus niger         | -                |        |
| 12            | Aspergillus terreus       | -                |        |
| 13            | Aspergillus nidulans      | -                |        |
| 14            | Aspergillus calidoustu    | -                |        |
| 15            | Cryptococcus neoformans   | -                |        |
| 16            | Cryptococcus gattii       | -                |        |
| 17            | Histoplasma capsulatum    | -                |        |
| 18            | Lichtheimia corymbifera   | -                |        |
| 19            | Mucor pusillus            | -                |        |
| 20            | Trichosporon asahii       | -                |        |
| 21            | Pneumocystis jirovecii    | -                |        |
| 22            | Penicillium marneffeii    | -                |        |
| 23            | Negative control          | -                |        |
| 24            | Blank                     | -                |        |

## Results Suggest:

Candida albicans and Candida glabrata indexes were positive.

Detector \_\_\_\_\_ Auditor \_\_\_\_\_ Detection date 2021-02-09 19:58:14

# Respiratory fungal nucleic acid test results

Affiliated Hospital Of Guangdong Medical University

## Basic sample information

|            |     |                    |                 |               |              |
|------------|-----|--------------------|-----------------|---------------|--------------|
| Name       |     | Sexuality          | Male            | Age           | 52 years old |
| Section    | ICU | Ward               |                 | Bed Number    | 2            |
| ID         |     | Clinical Diagnosis |                 | Sample Types  | sputum       |
| Test Items |     | Chip Number        | ZJ-202011010452 | Sample Number | 2021020802   |

## Detailed Results:

| Serial Number | Test Items                | Detected Results | Remark |
|---------------|---------------------------|------------------|--------|
| 1             | Positive external control | +                |        |
| 2             | Positive internal control | +                |        |
| 3             | Candida albicans          | -                |        |
| 4             | Candida tropicalis        | -                |        |
| 5             | Candida parapsilosis      | -                |        |
| 6             | Candida krusei            | -                |        |
| 7             | Candida glabrata          | +                |        |
| 8             | Candida auris             | -                |        |
| 9             | Aspergillus fumigatus     | -                |        |
| 10            | Aspergillus flavus        | -                |        |
| 11            | Aspergillus niger         | -                |        |
| 12            | Aspergillus terreus       | -                |        |
| 13            | Aspergillus nidulans      | -                |        |
| 14            | Aspergillus calidoustu    | -                |        |
| 15            | Cryptococcus neoformans   | -                |        |
| 16            | Cryptococcus gattii       | -                |        |
| 17            | Histoplasma capsulatum    | -                |        |
| 18            | Lichtheimia corymbifera   | -                |        |
| 19            | Mucor pusillus            | -                |        |
| 20            | Trichosporon asahii       | -                |        |
| 21            | Pneumocystis jirovecii    | -                |        |
| 22            | Penicillium marneffeii    | -                |        |
| 23            | Negative control          | -                |        |
| 24            | Blank                     | -                |        |

## Results Suggest:

Candida glabrata index was positive.

Detector \_\_\_\_\_ Auditor \_\_\_\_\_ Detection date 2021-02-09 20:02:10

# Respiratory fungal nucleic acid test results

Affiliated Hospital Of Guangdong Medical University

## Basic sample information

|            |     |                    |                 |               |              |
|------------|-----|--------------------|-----------------|---------------|--------------|
| Name       |     | Sexuality          | Female          | Age           | 54 years old |
| Section    | ICU | Ward               |                 | Bed Number    | 6            |
| ID         |     | Clinical Diagnosis |                 | Sample Types  | sputum       |
| Test Items |     | Chip Number        | ZJ-202011010453 | Sample Number | 2021020803   |

## Detailed Results:

| Serial Number | Test Items                | Detected Results | Remark |
|---------------|---------------------------|------------------|--------|
| 1             | Positive external control | +                |        |
| 2             | Positive internal control | +                |        |
| 3             | Candida albicans          | -                |        |
| 4             | Candida tropicalis        | -                |        |
| 5             | Candida parapsilosis      | -                |        |
| 6             | Candida krusei            | -                |        |
| 7             | Candida glabrata          | -                |        |
| 8             | Candida auris             | -                |        |
| 9             | Aspergillus fumigatus     | -                |        |
| 10            | Aspergillus flavus        | -                |        |
| 11            | Aspergillus niger         | -                |        |
| 12            | Aspergillus terreus       | -                |        |
| 13            | Aspergillus nidulans      | -                |        |
| 14            | Aspergillus calidoustu    | -                |        |
| 15            | Cryptococcus neoformans   | -                |        |
| 16            | Cryptococcus gattii       | -                |        |
| 17            | Histoplasma capsulatum    | -                |        |
| 18            | Lichtheimia corymbifera   | -                |        |
| 19            | Mucor pusillus            | -                |        |
| 20            | Trichosporon asahii       | -                |        |
| 21            | Pneumocystis jirovecii    | -                |        |
| 22            | Penicillium marneffeii    | -                |        |
| 23            | Negative control          | -                |        |
| 24            | Blank                     | -                |        |

## Results Suggest:

No abnormality was found after detection.

Detector \_\_\_\_\_ Auditor \_\_\_\_\_ Detection date 2021-02-09 17:41:19

# Respiratory fungal nucleic acid test results

Affiliated Hospital Of Guangdong Medical University

## Basic sample information

|            |     |                    |                 |               |              |
|------------|-----|--------------------|-----------------|---------------|--------------|
| Name       |     | Sexuality          | Female          | Age           | 67 years old |
| Section    | ICU | Ward               |                 | Bed Number    | 7            |
| ID         |     | Clinical Diagnosis |                 | Sample Types  | sputum       |
| Test Items |     | Chip Number        | ZJ-202011010454 | Sample Number | 2021020804   |

## Detailed Results:

| Serial Number | Test Items                | Detected Results | Remark |
|---------------|---------------------------|------------------|--------|
| 1             | Positive external control | +                |        |
| 2             | Positive internal control | +                |        |
| 3             | Candida albicans          | -                |        |
| 4             | Candida tropicalis        | -                |        |
| 5             | Candida parapsilosis      | -                |        |
| 6             | Candida krusei            | -                |        |
| 7             | Candida glabrata          | -                |        |
| 8             | Candida auris             | -                |        |
| 9             | Aspergillus fumigatus     | +                |        |
| 10            | Aspergillus flavus        | -                |        |
| 11            | Aspergillus niger         | -                |        |
| 12            | Aspergillus terreus       | -                |        |
| 13            | Aspergillus nidulans      | -                |        |
| 14            | Aspergillus calidoustu    | -                |        |
| 15            | Cryptococcus neoformans   | -                |        |
| 16            | Cryptococcus gattii       | -                |        |
| 17            | Histoplasma capsulatum    | -                |        |
| 18            | Lichtheimia corymbifera   | -                |        |
| 19            | Mucor pusillus            | -                |        |
| 20            | Trichosporon asahii       | -                |        |
| 21            | Pneumocystis jirovecii    | -                |        |
| 22            | Penicillium marneffeii    | -                |        |
| 23            | Negative control          | -                |        |
| 24            | Blank                     | -                |        |

## Results Suggest:

Aspergillus fumigatus index was positive.

Detector \_\_\_\_\_ Auditor \_\_\_\_\_ Detection date 2021-02-09 19:23:13



# Respiratory fungal nucleic acid test results

Affiliated Hospital Of Guangdong Medical University

## Basic sample information

|            |     |                    |                 |               |                              |
|------------|-----|--------------------|-----------------|---------------|------------------------------|
| Name       |     | Sexuality          | Male            | Age           | 62 years old                 |
| Section    | ICU | Ward               |                 | Bed Number    | 3                            |
| ID         |     | Clinical Diagnosis |                 | Sample Types  | bronchoalveolar lavage fluid |
| Test Items |     | Chip Number        | ZJ-202011010455 | Sample Number | 2021022601                   |

## Detailed Results:

| Serial Number | Test Items                | Detected Results | Remark |
|---------------|---------------------------|------------------|--------|
| 1             | Positive external control | +                |        |
| 2             | Positive internal control | +                |        |
| 3             | Candida albicans          | -                |        |
| 4             | Candida tropicalis        | -                |        |
| 5             | Candida parapsilosis      | -                |        |
| 6             | Candida krusei            | -                |        |
| 7             | Candida glabrata          | -                |        |
| 8             | Candida auris             | -                |        |
| 9             | Aspergillus fumigatus     | -                |        |
| 10            | Aspergillus flavus        | -                |        |
| 11            | Aspergillus niger         | -                |        |
| 12            | Aspergillus terreus       | -                |        |
| 13            | Aspergillus nidulans      | -                |        |
| 14            | Aspergillus calidoustu    | -                |        |
| 15            | Cryptococcus neoformans   | -                |        |
| 16            | Cryptococcus gattii       | -                |        |
| 17            | Histoplasma capsulatum    | -                |        |
| 18            | Lichtheimia corymbifera   | -                |        |
| 19            | Mucor pusillus            | -                |        |
| 20            | Trichosporon asahii       | -                |        |
| 21            | Pneumocystis jirovecii    | -                |        |
| 22            | Penicillium marneffeii    | -                |        |
| 23            | Negative control          | -                |        |
| 24            | Blank                     | -                |        |

## Results Suggest:

No abnormality was found after detection.

Detector \_\_\_\_\_ Auditor \_\_\_\_\_ Detection date 2021-02-27 15:58:44

# Respiratory fungal nucleic acid test results

Affiliated Hospital Of Guangdong Medical University

## Basic sample information

|            |     |                    |                 |               |              |
|------------|-----|--------------------|-----------------|---------------|--------------|
| Name       |     | Sexuality          | Male            | Age           | 53 years old |
| Section    | ICU | Ward               |                 | Bed Number    | 10           |
| ID         |     | Clinical Diagnosis |                 | Sample Types  | sputum       |
| Test Items |     | Chip Number        | ZJ-202011010456 | Sample Number | 2021022602   |

## Detailed Results:

| Serial Number | Test Items                | Detected Results | Remark |
|---------------|---------------------------|------------------|--------|
| 1             | Positive external control | +                |        |
| 2             | Positive internal control | +                |        |
| 3             | Candida albicans          | +                |        |
| 4             | Candida tropicalis        | -                |        |
| 5             | Candida parapsilosis      | -                |        |
| 6             | Candida krusei            | -                |        |
| 7             | Candida glabrata          | -                |        |
| 8             | Candida auris             | -                |        |
| 9             | Aspergillus fumigatus     | -                |        |
| 10            | Aspergillus flavus        | -                |        |
| 11            | Aspergillus niger         | -                |        |
| 12            | Aspergillus terreus       | -                |        |
| 13            | Aspergillus nidulans      | -                |        |
| 14            | Aspergillus calidoustu    | -                |        |
| 15            | Cryptococcus neoformans   | -                |        |
| 16            | Cryptococcus gattii       | -                |        |
| 17            | Histoplasma capsulatum    | -                |        |
| 18            | Lichtheimia corymbifera   | -                |        |
| 19            | Mucor pusillus            | -                |        |
| 20            | Trichosporon asahii       | -                |        |
| 21            | Pneumocystis jirovecii    | -                |        |
| 22            | Penicillium marneffeii    | -                |        |
| 23            | Negative control          | -                |        |
| 24            | Blank                     | -                |        |

## Results Suggest:

Candida albicans index was positive.

Detector \_\_\_\_\_ Auditor \_\_\_\_\_ Detection date 2021-02-27 17:04:48

# Respiratory fungal nucleic acid test results

Affiliated Hospital Of Guangdong Medical University

## Basic sample information

|            |     |                    |                 |               |              |
|------------|-----|--------------------|-----------------|---------------|--------------|
| Name       |     | Sexuality          | Male            | Age           | 26 years old |
| Section    | ICU | Ward               |                 | Bed Number    | 203          |
| ID         |     | Clinical Diagnosis |                 | Sample Types  | sputum       |
| Test Items |     | Chip Number        | ZJ-202011010457 | Sample Number | 2021022603   |

## Detailed Results:

| Serial Number | Test Items                | Detected Results | Remark |
|---------------|---------------------------|------------------|--------|
| 1             | Positive external control | +                |        |
| 2             | Positive internal control | +                |        |
| 3             | Candida albicans          | +                |        |
| 4             | Candida tropicalis        | +                |        |
| 5             | Candida parapsilosis      | -                |        |
| 6             | Candida krusei            | -                |        |
| 7             | Candida glabrata          | -                |        |
| 8             | Candida auris             | -                |        |
| 9             | Aspergillus fumigatus     | -                |        |
| 10            | Aspergillus flavus        | -                |        |
| 11            | Aspergillus niger         | -                |        |
| 12            | Aspergillus terreus       | -                |        |
| 13            | Aspergillus nidulans      | -                |        |
| 14            | Aspergillus calidoustu    | -                |        |
| 15            | Cryptococcus neoformans   | -                |        |
| 16            | Cryptococcus gattii       | -                |        |
| 17            | Histoplasma capsulatum    | -                |        |
| 18            | Lichtheimia corymbifera   | -                |        |
| 19            | Mucor pusillus            | -                |        |
| 20            | Trichosporon asahii       | -                |        |
| 21            | Pneumocystis jirovecii    | -                |        |
| 22            | Penicillium marneffeii    | -                |        |
| 23            | Negative control          | -                |        |
| 24            | Blank                     | -                |        |

## Results Suggest:

Candida albicans and Candida tropicalis indexes were positive.

Detector \_\_\_\_\_ Auditor \_\_\_\_\_ Detection date 2021-02-27 18:11:08

# Respiratory fungal nucleic acid test results

Affiliated Hospital Of Guangdong Medical University

## Basic sample information

|            |     |                    |                 |               |              |
|------------|-----|--------------------|-----------------|---------------|--------------|
| Name       |     | Sexuality          | Female          | Age           | 53 years old |
| Section    | ICU | Ward               |                 | Bed Number    | 205          |
| ID         |     | Clinical Diagnosis |                 | Sample Types  | sputum       |
| Test Items |     | Chip Number        | ZJ-202011010458 | Sample Number | 2021022604   |

## Detailed Results:

| Serial Number | Test Items                | Detected Results | Remark |
|---------------|---------------------------|------------------|--------|
| 1             | Positive external control | +                |        |
| 2             | Positive internal control | +                |        |
| 3             | Candida albicans          | -                |        |
| 4             | Candida tropicalis        | -                |        |
| 5             | Candida parapsilosis      | -                |        |
| 6             | Candida krusei            | -                |        |
| 7             | Candida glabrata          | -                |        |
| 8             | Candida auris             | -                |        |
| 9             | Aspergillus fumigatus     | -                |        |
| 10            | Aspergillus flavus        | -                |        |
| 11            | Aspergillus niger         | -                |        |
| 12            | Aspergillus terreus       | -                |        |
| 13            | Aspergillus nidulans      | -                |        |
| 14            | Aspergillus calidoustu    | -                |        |
| 15            | Cryptococcus neoformans   | -                |        |
| 16            | Cryptococcus gattii       | -                |        |
| 17            | Histoplasma capsulatum    | -                |        |
| 18            | Lichtheimia corymbifera   | -                |        |
| 19            | Mucor pusillus            | -                |        |
| 20            | Trichosporon asahii       | -                |        |
| 21            | Pneumocystis jirovecii    | -                |        |
| 22            | Penicillium marneffeii    | -                |        |
| 23            | Negative control          | -                |        |
| 24            | Blank                     | -                |        |

## Results Suggest:

No abnormality was found after detection.

Detector \_\_\_\_\_ Auditor \_\_\_\_\_ Detection date 2021-02-27 21:02:22

# Respiratory fungal nucleic acid test results

Affiliated Hospital Of Guangdong Medical University

## Basic sample information

|            |     |                    |                 |               |              |
|------------|-----|--------------------|-----------------|---------------|--------------|
| Name       |     | Sexuality          | Male            | Age           | 87 years old |
| Section    | ICU | Ward               |                 | Bed Number    | 301          |
| ID         |     | Clinical Diagnosis |                 | Sample Types  | sputum       |
| Test Items |     | Chip Number        | ZJ-202011010459 | Sample Number | 2021022605   |

## Detailed Results:

| Serial Number | Test Items                | Detected Results | Remark |
|---------------|---------------------------|------------------|--------|
| 1             | Positive external control | +                |        |
| 2             | Positive internal control | +                |        |
| 3             | Candida albicans          | +                |        |
| 4             | Candida tropicalis        | -                |        |
| 5             | Candida parapsilosis      | -                |        |
| 6             | Candida krusei            | -                |        |
| 7             | Candida glabrata          | -                |        |
| 8             | Candida auris             | -                |        |
| 9             | Aspergillus fumigatus     | +                |        |
| 10            | Aspergillus flavus        | -                |        |
| 11            | Aspergillus niger         | -                |        |
| 12            | Aspergillus terreus       | -                |        |
| 13            | Aspergillus nidulans      | -                |        |
| 14            | Aspergillus calidoustu    | -                |        |
| 15            | Cryptococcus neoformans   | -                |        |
| 16            | Cryptococcus gattii       | -                |        |
| 17            | Histoplasma capsulatum    | -                |        |
| 18            | Lichtheimia corymbifera   | -                |        |
| 19            | Mucor pusillus            | -                |        |
| 20            | Trichosporon asahii       | -                |        |
| 21            | Pneumocystis jirovecii    | -                |        |
| 22            | Penicillium marneffeii    | -                |        |
| 23            | Negative control          | -                |        |
| 24            | Blank                     | -                |        |

## Results Suggest:

Candida albicans and Aspergillus fumigatus indexes were positive.

Detector \_\_\_\_\_ Auditor \_\_\_\_\_ Detection date 2021-02-27 20:02:08

# Respiratory fungal nucleic acid test results

Affiliated Hospital Of Guangdong Medical University

## Basic sample information

|            |     |                    |                 |               |              |
|------------|-----|--------------------|-----------------|---------------|--------------|
| Name       |     | Sexuality          | Male            | Age           | 72 years old |
| Section    | ICU | Ward               |                 | Bed Number    | 312          |
| ID         |     | Clinical Diagnosis |                 | Sample Types  | sputum       |
| Test Items |     | Chip Number        | ZJ-202011010460 | Sample Number | 2021022606   |

## Detailed Results:

| Serial Number | Test Items                | Detected Results | Remark |
|---------------|---------------------------|------------------|--------|
| 1             | Positive external control | +                |        |
| 2             | Positive internal control | +                |        |
| 3             | Candida albicans          | -                |        |
| 4             | Candida tropicalis        | -                |        |
| 5             | Candida parapsilosis      | -                |        |
| 6             | Candida krusei            | -                |        |
| 7             | Candida glabrata          | -                |        |
| 8             | Candida auris             | -                |        |
| 9             | Aspergillus fumigatus     | -                |        |
| 10            | Aspergillus flavus        | -                |        |
| 11            | Aspergillus niger         | -                |        |
| 12            | Aspergillus terreus       | -                |        |
| 13            | Aspergillus nidulans      | -                |        |
| 14            | Aspergillus calidoustu    | -                |        |
| 15            | Cryptococcus neoformans   | -                |        |
| 16            | Cryptococcus gattii       | -                |        |
| 17            | Histoplasma capsulatum    | -                |        |
| 18            | Lichtheimia corymbifera   | -                |        |
| 19            | Mucor pusillus            | -                |        |
| 20            | Trichosporon asahii       | -                |        |
| 21            | Pneumocystis jirovecii    | -                |        |
| 22            | Penicillium marneffeii    | -                |        |
| 23            | Negative control          | -                |        |
| 24            | Blank                     | -                |        |

## Results Suggest:

No abnormality was found after detection.

Detector \_\_\_\_\_ Auditor \_\_\_\_\_ Detection date 2021-02-27 20:56:58

# Respiratory fungal nucleic acid test results

Affiliated Hospital Of Guangdong Medical University

## Basic sample information

|            |     |                    |                 |               |              |
|------------|-----|--------------------|-----------------|---------------|--------------|
| Name       |     | Sexuality          | Male            | Age           | 78 years old |
| Section    | ICU | Ward               |                 | Bed Number    | 3001         |
| ID         |     | Clinical Diagnosis |                 | Sample Types  | sputum       |
| Test Items |     | Chip Number        | ZJ-202011010278 | Sample Number | 2021030402   |

## Detailed Results:

| Serial Number | Test Items                | Detected Results | Remark |
|---------------|---------------------------|------------------|--------|
| 1             | Positive external control | +                |        |
| 2             | Positive internal control | +                |        |
| 3             | Candida albicans          | -                |        |
| 4             | Candida tropicalis        | -                |        |
| 5             | Candida parapsilosis      | -                |        |
| 6             | Candida krusei            | -                |        |
| 7             | Candida glabrata          | -                |        |
| 8             | Candida auris             | -                |        |
| 9             | Aspergillus fumigatus     | -                |        |
| 10            | Aspergillus flavus        | -                |        |
| 11            | Aspergillus niger         | -                |        |
| 12            | Aspergillus terreus       | -                |        |
| 13            | Aspergillus nidulans      | -                |        |
| 14            | Aspergillus calidoustu    | -                |        |
| 15            | Cryptococcus neoformans   | -                |        |
| 16            | Cryptococcus gattii       | -                |        |
| 17            | Histoplasma capsulatum    | -                |        |
| 18            | Lichtheimia corymbifera   | -                |        |
| 19            | Mucor pusillus            | -                |        |
| 20            | Trichosporon asahii       | -                |        |
| 21            | Pneumocystis jirovecii    | -                |        |
| 22            | Penicillium marneffeii    | -                |        |
| 23            | Negative control          | -                |        |
| 24            | Blank                     | -                |        |

## Results Suggest:

No abnormality was found after detection.

Detector \_\_\_\_\_ Auditor \_\_\_\_\_ Detection date 2021-03-05 09:04:23

# Respiratory fungal nucleic acid test results

Affiliated Hospital Of Guangdong Medical University

## Basic sample information

|            |     |                    |                 |               |              |
|------------|-----|--------------------|-----------------|---------------|--------------|
| Name       |     | Sexuality          | Male            | Age           | 30 years old |
| Section    | ICU | Ward               |                 | Bed Number    | 204          |
| ID         |     | Clinical Diagnosis |                 | Sample Types  | sputum       |
| Test Items |     | Chip Number        | ZJ-202011010279 | Sample Number | 2021030401   |

## Detailed Results:

| Serial Number | Test Items                | Detected Results | Remark |
|---------------|---------------------------|------------------|--------|
| 1             | Positive external control | +                |        |
| 2             | Positive internal control | +                |        |
| 3             | Candida albicans          | -                |        |
| 4             | Candida tropicalis        | -                |        |
| 5             | Candida parapsilosis      | -                |        |
| 6             | Candida krusei            | -                |        |
| 7             | Candida glabrata          | -                |        |
| 8             | Candida auris             | -                |        |
| 9             | Aspergillus fumigatus     | -                |        |
| 10            | Aspergillus flavus        | -                |        |
| 11            | Aspergillus niger         | -                |        |
| 12            | Aspergillus terreus       | -                |        |
| 13            | Aspergillus nidulans      | -                |        |
| 14            | Aspergillus calidoustu    | -                |        |
| 15            | Cryptococcus neoformans   | -                |        |
| 16            | Cryptococcus gattii       | -                |        |
| 17            | Histoplasma capsulatum    | -                |        |
| 18            | Lichtheimia corymbifera   | -                |        |
| 19            | Mucor pusillus            | -                |        |
| 20            | Trichosporon asahii       | -                |        |
| 21            | Pneumocystis jirovecii    | -                |        |
| 22            | Penicillium marneffeii    | -                |        |
| 23            | Negative control          | -                |        |
| 24            | Blank                     | -                |        |

## Results Suggest:

No abnormality was found after detection.

Detector \_\_\_\_\_ Auditor \_\_\_\_\_ Detection date 2021-03-05 09:59:17



# Respiratory fungal nucleic acid test results

Affiliated Hospital Of Guangdong Medical University

## Basic sample information

|            |     |                    |                 |               |                        |
|------------|-----|--------------------|-----------------|---------------|------------------------|
| Name       |     | Sexuality          | Female          | Age           | 39 years old           |
| Section    | ICU | Ward               |                 | Bed Number    | 4                      |
| ID         |     | Clinical Diagnosis |                 | Sample Types  | pleuroperitoneal fluid |
| Test Items |     | Chip Number        | ZJ-202011010280 | Sample Number | 2021030404             |

## Detailed Results:

| Serial Number | Test Items                | Detected Results | Remark |
|---------------|---------------------------|------------------|--------|
| 1             | Positive external control | +                |        |
| 2             | Positive internal control | +                |        |
| 3             | Candida albicans          | -                |        |
| 4             | Candida tropicalis        | -                |        |
| 5             | Candida parapsilosis      | -                |        |
| 6             | Candida krusei            | -                |        |
| 7             | Candida glabrata          | -                |        |
| 8             | Candida auris             | -                |        |
| 9             | Aspergillus fumigatus     | -                |        |
| 10            | Aspergillus flavus        | -                |        |
| 11            | Aspergillus niger         | -                |        |
| 12            | Aspergillus terreus       | -                |        |
| 13            | Aspergillus nidulans      | -                |        |
| 14            | Aspergillus calidoustu    | -                |        |
| 15            | Cryptococcus neoformans   | -                |        |
| 16            | Cryptococcus gattii       | -                |        |
| 17            | Histoplasma capsulatum    | -                |        |
| 18            | Lichtheimia corymbifera   | -                |        |
| 19            | Mucor pusillus            | -                |        |
| 20            | Trichosporon asahii       | -                |        |
| 21            | Pneumocystis jirovecii    | -                |        |
| 22            | Penicillium marneffeii    | -                |        |
| 23            | Negative control          | -                |        |
| 24            | Blank                     | -                |        |

## Results Suggest:

No abnormality was found after detection.

Detector \_\_\_\_\_ Auditor \_\_\_\_\_ Detection date 2021-03-05 10:55:55

# Respiratory fungal nucleic acid test results

Affiliated Hospital Of Guangdong Medical University

## Basic sample information

|            |      |                    |                 |               |              |
|------------|------|--------------------|-----------------|---------------|--------------|
| Name       |      | Sexuality          | Male            | Age           | 51 years old |
| Section    | EICU | Ward               |                 | Bed Number    | 1            |
| ID         |      | Clinical Diagnosis |                 | Sample Types  | sputum       |
| Test Items |      | Chip Number        | ZJ-202011010281 | Sample Number | 2021030901   |

## Detailed Results:

| Serial Number | Test Items                | Detected Results | Remark |
|---------------|---------------------------|------------------|--------|
| 1             | Positive external control | +                |        |
| 2             | Positive internal control | +                |        |
| 3             | Candida albicans          | -                |        |
| 4             | Candida tropicalis        | -                |        |
| 5             | Candida parapsilosis      | -                |        |
| 6             | Candida krusei            | -                |        |
| 7             | Candida glabrata          | -                |        |
| 8             | Candida auris             | -                |        |
| 9             | Aspergillus fumigatus     | -                |        |
| 10            | Aspergillus flavus        | -                |        |
| 11            | Aspergillus niger         | -                |        |
| 12            | Aspergillus terreus       | -                |        |
| 13            | Aspergillus nidulans      | -                |        |
| 14            | Aspergillus calidoustu    | -                |        |
| 15            | Cryptococcus neoformans   | -                |        |
| 16            | Cryptococcus gattii       | -                |        |
| 17            | Histoplasma capsulatum    | -                |        |
| 18            | Lichtheimia corymbifera   | -                |        |
| 19            | Mucor pusillus            | -                |        |
| 20            | Trichosporon asahii       | -                |        |
| 21            | Pneumocystis jirovecii    | -                |        |
| 22            | Penicillium marneffeii    | -                |        |
| 23            | Negative control          | -                |        |
| 24            | Blank                     | -                |        |

## Results Suggest:

No abnormality was found after detection.

Detector \_\_\_\_\_ Auditor \_\_\_\_\_ Detection date 2021-03-10 10:15:32

# Respiratory fungal nucleic acid test results

Affiliated Hospital Of Guangdong Medical University

## Basic sample information

|            |      |                    |                 |               |              |
|------------|------|--------------------|-----------------|---------------|--------------|
| Name       |      | Sexuality          | Female          | Age           | 80 years old |
| Section    | EICU | Ward               |                 | Bed Number    | 3            |
| ID         |      | Clinical Diagnosis |                 | Sample Types  | sputum       |
| Test Items |      | Chip Number        | ZJ-202011010282 | Sample Number | 2020030902   |

## Detailed Results:

| Serial Number | Test Items                | Detected Results | Remark |
|---------------|---------------------------|------------------|--------|
| 1             | Positive external control | +                |        |
| 2             | Positive internal control | +                |        |
| 3             | Candida albicans          | +                |        |
| 4             | Candida tropicalis        | +                |        |
| 5             | Candida parapsilosis      | -                |        |
| 6             | Candida krusei            | -                |        |
| 7             | Candida glabrata          | +                |        |
| 8             | Candida auris             | -                |        |
| 9             | Aspergillus fumigatus     | -                |        |
| 10            | Aspergillus flavus        | -                |        |
| 11            | Aspergillus niger         | -                |        |
| 12            | Aspergillus terreus       | -                |        |
| 13            | Aspergillus nidulans      | -                |        |
| 14            | Aspergillus calidoustu    | -                |        |
| 15            | Cryptococcus neoformans   | -                |        |
| 16            | Cryptococcus gattii       | -                |        |
| 17            | Histoplasma capsulatum    | -                |        |
| 18            | Lichtheimia corymbifera   | -                |        |
| 19            | Mucor pusillus            | -                |        |
| 20            | Trichosporon asahii       | -                |        |
| 21            | Pneumocystis jirovecii    | -                |        |
| 22            | Penicillium marneffeii    | -                |        |
| 23            | Negative control          | -                |        |
| 24            | Blank                     | -                |        |

## Results Suggest:

Candida albicans, Candida tropicalis and Candida glabrata indexes were positive.

2021-03-10  
Detector \_\_\_\_\_ Auditor \_\_\_\_\_ Detection date 11:10:40

# Respiratory fungal nucleic acid test results

Affiliated Hospital Of Guangdong Medical University

## Basic sample information

|            |      |                    |                 |               |              |
|------------|------|--------------------|-----------------|---------------|--------------|
| Name       |      | Sexuality          | 男               | Age           | 58 years old |
| Section    | EICU | Ward               |                 | Bed Number    | 4            |
| ID         |      | Clinical Diagnosis |                 | Sample Types  | sputum       |
| Test Items |      | Chip Number        | ZJ-202011010283 | Sample Number | 2021030903   |

## Detailed Results:

| Serial Number | Test Items                | Detected Results | Remark |
|---------------|---------------------------|------------------|--------|
| 1             | Positive external control | +                |        |
| 2             | Positive internal control | +                |        |
| 3             | Candida albicans          | -                |        |
| 4             | Candida tropicalis        | -                |        |
| 5             | Candida parapsilosis      | -                |        |
| 6             | Candida krusei            | -                |        |
| 7             | Candida glabrata          | -                |        |
| 8             | Candida auris             | -                |        |
| 9             | Aspergillus fumigatus     | -                |        |
| 10            | Aspergillus flavus        | -                |        |
| 11            | Aspergillus niger         | -                |        |
| 12            | Aspergillus terreus       | -                |        |
| 13            | Aspergillus nidulans      | -                |        |
| 14            | Aspergillus calidoustu    | -                |        |
| 15            | Cryptococcus neoformans   | -                |        |
| 16            | Cryptococcus gattii       | -                |        |
| 17            | Histoplasma capsulatum    | -                |        |
| 18            | Lichtheimia corymbifera   | -                |        |
| 19            | Mucor pusillus            | -                |        |
| 20            | Trichosporon asahii       | -                |        |
| 21            | Pneumocystis jirovecii    | -                |        |
| 22            | Penicillium marneffeii    | -                |        |
| 23            | Negative control          | -                |        |
| 24            | Blank                     | -                |        |

## Results Suggest:

No abnormality was found after detection.

Detector \_\_\_\_\_ Auditor \_\_\_\_\_ Detection date 2021-03-10 14:19:01

# Respiratory fungal nucleic acid test results

Affiliated Hospital Of Guangdong Medical University

## Basic sample information

|            |     |                    |                 |               |              |
|------------|-----|--------------------|-----------------|---------------|--------------|
| Name       |     | Sexuality          | 女               | Age           | 51 years old |
| Section    | ICU | Ward               |                 | Bed Number    | 12           |
| ID         |     | Clinical Diagnosis |                 | Sample Types  | sputum       |
| Test Items |     | Chip Number        | ZJ-202011010284 | Sample Number | 2021031501   |

## Detailed Results:

| Serial Number | Test Items                | Detected Results | Remark |
|---------------|---------------------------|------------------|--------|
| 1             | Positive external control | +                |        |
| 2             | Positive internal control | +                |        |
| 3             | Candida albicans          | +                |        |
| 4             | Candida tropicalis        | -                |        |
| 5             | Candida parapsilosis      | -                |        |
| 6             | Candida krusei            | -                |        |
| 7             | Candida glabrata          | -                |        |
| 8             | Candida auris             | -                |        |
| 9             | Aspergillus fumigatus     | -                |        |
| 10            | Aspergillus flavus        | -                |        |
| 11            | Aspergillus niger         | -                |        |
| 12            | Aspergillus terreus       | -                |        |
| 13            | Aspergillus nidulans      | -                |        |
| 14            | Aspergillus calidoustu    | -                |        |
| 15            | Cryptococcus neoformans   | -                |        |
| 16            | Cryptococcus gattii       | -                |        |
| 17            | Histoplasma capsulatum    | -                |        |
| 18            | Lichtheimia corymbifera   | -                |        |
| 19            | Mucor pusillus            | -                |        |
| 20            | Trichosporon asahii       | -                |        |
| 21            | Pneumocystis jirovecii    | -                |        |
| 22            | Penicillium marneffeii    | -                |        |
| 23            | Negative control          | -                |        |
| 24            | Blank                     | -                |        |

## Results Suggest:

Candida albicans index was positive.

Detector \_\_\_\_\_ Auditor \_\_\_\_\_ Detection date 2021-03-16 17:25:38

# Respiratory fungal nucleic acid test results

Affiliated Hospital Of Guangdong Medical University

## Basic sample information

|            |     |                    |                 |               |              |
|------------|-----|--------------------|-----------------|---------------|--------------|
| Name       |     | Sexuality          | 女               | Age           | 69 years old |
| Section    | ICU | Ward               |                 | Bed Number    | 206          |
| ID         |     | Clinical Diagnosis |                 | Sample Types  | sputum       |
| Test Items |     | Chip Number        | ZJ-202011010285 | Sample Number | 2021031502   |

## Detailed Results:

| Serial Number | Test Items                | Detected Results | Remark |
|---------------|---------------------------|------------------|--------|
| 1             | Positive external control | +                |        |
| 2             | Positive internal control | +                |        |
| 3             | Candida albicans          | -                |        |
| 4             | Candida tropicalis        | -                |        |
| 5             | Candida parapsilosis      | -                |        |
| 6             | Candida krusei            | -                |        |
| 7             | Candida glabrata          | -                |        |
| 8             | Candida auris             | -                |        |
| 9             | Aspergillus fumigatus     | -                |        |
| 10            | Aspergillus flavus        | -                |        |
| 11            | Aspergillus niger         | -                |        |
| 12            | Aspergillus terreus       | -                |        |
| 13            | Aspergillus nidulans      | -                |        |
| 14            | Aspergillus calidoustu    | -                |        |
| 15            | Cryptococcus neoformans   | -                |        |
| 16            | Cryptococcus gattii       | -                |        |
| 17            | Histoplasma capsulatum    | -                |        |
| 18            | Lichtheimia corymbifera   | -                |        |
| 19            | Mucor pusillus            | -                |        |
| 20            | Trichosporon asahii       | -                |        |
| 21            | Pneumocystis jirovecii    | -                |        |
| 22            | Penicillium marneffeii    | -                |        |
| 23            | Negative control          | -                |        |
| 24            | Blank                     | -                |        |

## Results Suggest:

No abnormality was found after detection.

Detector \_\_\_\_\_ Auditor \_\_\_\_\_ Detection date 2021-03-16 18:28:42

# Respiratory fungal nucleic acid test results

Affiliated Hospital Of Guangdong Medical University

## Basic sample information

|            |     |                    |                 |               |              |
|------------|-----|--------------------|-----------------|---------------|--------------|
| Name       |     | Sexuality          | 男               | Age           | 49 years old |
| Section    | ICU | Ward               |                 | Bed Number    | 307          |
| ID         |     | Clinical Diagnosis |                 | Sample Types  | sputum       |
| Test Items |     | Chip Number        | ZJ-202011010286 | Sample Number | 2021031504   |

## Detailed Results:

| Serial Number | Test Items                | Detected Results | Remark |
|---------------|---------------------------|------------------|--------|
| 1             | Positive external control | +                |        |
| 2             | Positive internal control | +                |        |
| 3             | Candida albicans          | -                |        |
| 4             | Candida tropicalis        | -                |        |
| 5             | Candida parapsilosis      | -                |        |
| 6             | Candida krusei            | -                |        |
| 7             | Candida glabrata          | +                |        |
| 8             | Candida auris             | -                |        |
| 9             | Aspergillus fumigatus     | -                |        |
| 10            | Aspergillus flavus        | -                |        |
| 11            | Aspergillus niger         | -                |        |
| 12            | Aspergillus terreus       | -                |        |
| 13            | Aspergillus nidulans      | -                |        |
| 14            | Aspergillus calidoustu    | -                |        |
| 15            | Cryptococcus neoformans   | -                |        |
| 16            | Cryptococcus gattii       | -                |        |
| 17            | Histoplasma capsulatum    | -                |        |
| 18            | Lichtheimia corymbifera   | -                |        |
| 19            | Mucor pusillus            | -                |        |
| 20            | Trichosporon asahii       | -                |        |
| 21            | Pneumocystis jirovecii    | -                |        |
| 22            | Penicillium marneffeii    | -                |        |
| 23            | Negative control          | -                |        |
| 24            | Blank                     | -                |        |

## Results Suggest:

Candida glabrata index was positive.

Detector \_\_\_\_\_ Auditor \_\_\_\_\_ Detection date 2021-03-16 19:23:05

# Respiratory fungal nucleic acid test results

Affiliated Hospital Of Guangdong Medical University

## Basic sample information

|            |     |                    |                 |               |              |
|------------|-----|--------------------|-----------------|---------------|--------------|
| Name       |     | Sexuality          | 男               | Age           | 46 years old |
| Section    | ICU | Ward               |                 | Bed Number    | 310          |
| ID         |     | Clinical Diagnosis |                 | Sample Types  | sputum       |
| Test Items |     | Chip Number        | ZJ-202011010287 | Sample Number | 2021031505   |

## Detailed Results:

| Serial Number | Test Items                | Detected Results | Remark |
|---------------|---------------------------|------------------|--------|
| 1             | Positive external control | +                |        |
| 2             | Positive internal control | +                |        |
| 3             | Candida albicans          | -                |        |
| 4             | Candida tropicalis        | -                |        |
| 5             | Candida parapsilosis      | -                |        |
| 6             | Candida krusei            | -                |        |
| 7             | Candida glabrata          | -                |        |
| 8             | Candida auris             | -                |        |
| 9             | Aspergillus fumigatus     | -                |        |
| 10            | Aspergillus flavus        | -                |        |
| 11            | Aspergillus niger         | -                |        |
| 12            | Aspergillus terreus       | -                |        |
| 13            | Aspergillus nidulans      | -                |        |
| 14            | Aspergillus calidoustu    | -                |        |
| 15            | Cryptococcus neoformans   | -                |        |
| 16            | Cryptococcus gattii       | -                |        |
| 17            | Histoplasma capsulatum    | -                |        |
| 18            | Lichtheimia corymbifera   | -                |        |
| 19            | Mucor pusillus            | -                |        |
| 20            | Trichosporon asahii       | -                |        |
| 21            | Pneumocystis jirovecii    | -                |        |
| 22            | Penicillium marneffeii    | -                |        |
| 23            | Negative control          | -                |        |
| 24            | Blank                     | -                |        |

## Results Suggest:

No abnormality was found after detection.

Detector \_\_\_\_\_ Auditor \_\_\_\_\_ Detection date 2021-03-17 08:49:46



# Respiratory fungal nucleic acid test results

Affiliated Hospital Of Guangdong Medical University

## Basic sample information

|            |                                    |                    |                 |               |                              |
|------------|------------------------------------|--------------------|-----------------|---------------|------------------------------|
| Name       |                                    | Sexuality          | 男               | Age           | 37 years old                 |
| Section    | department of respiratory medicine | Ward               |                 | Bed Number    | 3001                         |
| ID         |                                    | Clinical Diagnosis |                 | Sample Types  | bronchoalveolar lavage fluid |
| Test Items |                                    | Chip Number        | ZJ-202011010289 | Sample Number | 2021060101                   |

## Detailed Results:

| Serial Number | Test Items                | Detected Results | Remark |
|---------------|---------------------------|------------------|--------|
| 1             | Positive external control | +                |        |
| 2             | Positive internal control | +                |        |
| 3             | Candida albicans          | +                |        |
| 4             | Candida tropicalis        | -                |        |
| 5             | Candida parapsilosis      | -                |        |
| 6             | Candida krusei            | -                |        |
| 7             | Candida glabrata          | -                |        |
| 8             | Candida auris             | -                |        |
| 9             | Aspergillus fumigatus     | -                |        |
| 10            | Aspergillus flavus        | -                |        |
| 11            | Aspergillus niger         | -                |        |
| 12            | Aspergillus terreus       | -                |        |
| 13            | Aspergillus nidulans      | -                |        |
| 14            | Aspergillus calidoustu    | -                |        |
| 15            | Cryptococcus neoformans   | -                |        |
| 16            | Cryptococcus gattii       | -                |        |
| 17            | Histoplasma capsulatum    | -                |        |
| 18            | Lichtheimia corymbifera   | -                |        |
| 19            | Mucor pusillus            | -                |        |
| 20            | Trichosporon asahii       | -                |        |
| 21            | Pneumocystis jirovecii    | -                |        |
| 22            | Penicillium marneffeii    | -                |        |
| 23            | Negative control          | -                |        |
| 24            | Blank                     | -                |        |

## Results Suggest:

Candida albicans index was positive.

Detector \_\_\_\_\_ Auditor \_\_\_\_\_ Detection date 2023-06-25 21:06:07

# Algorithm Processing Curve

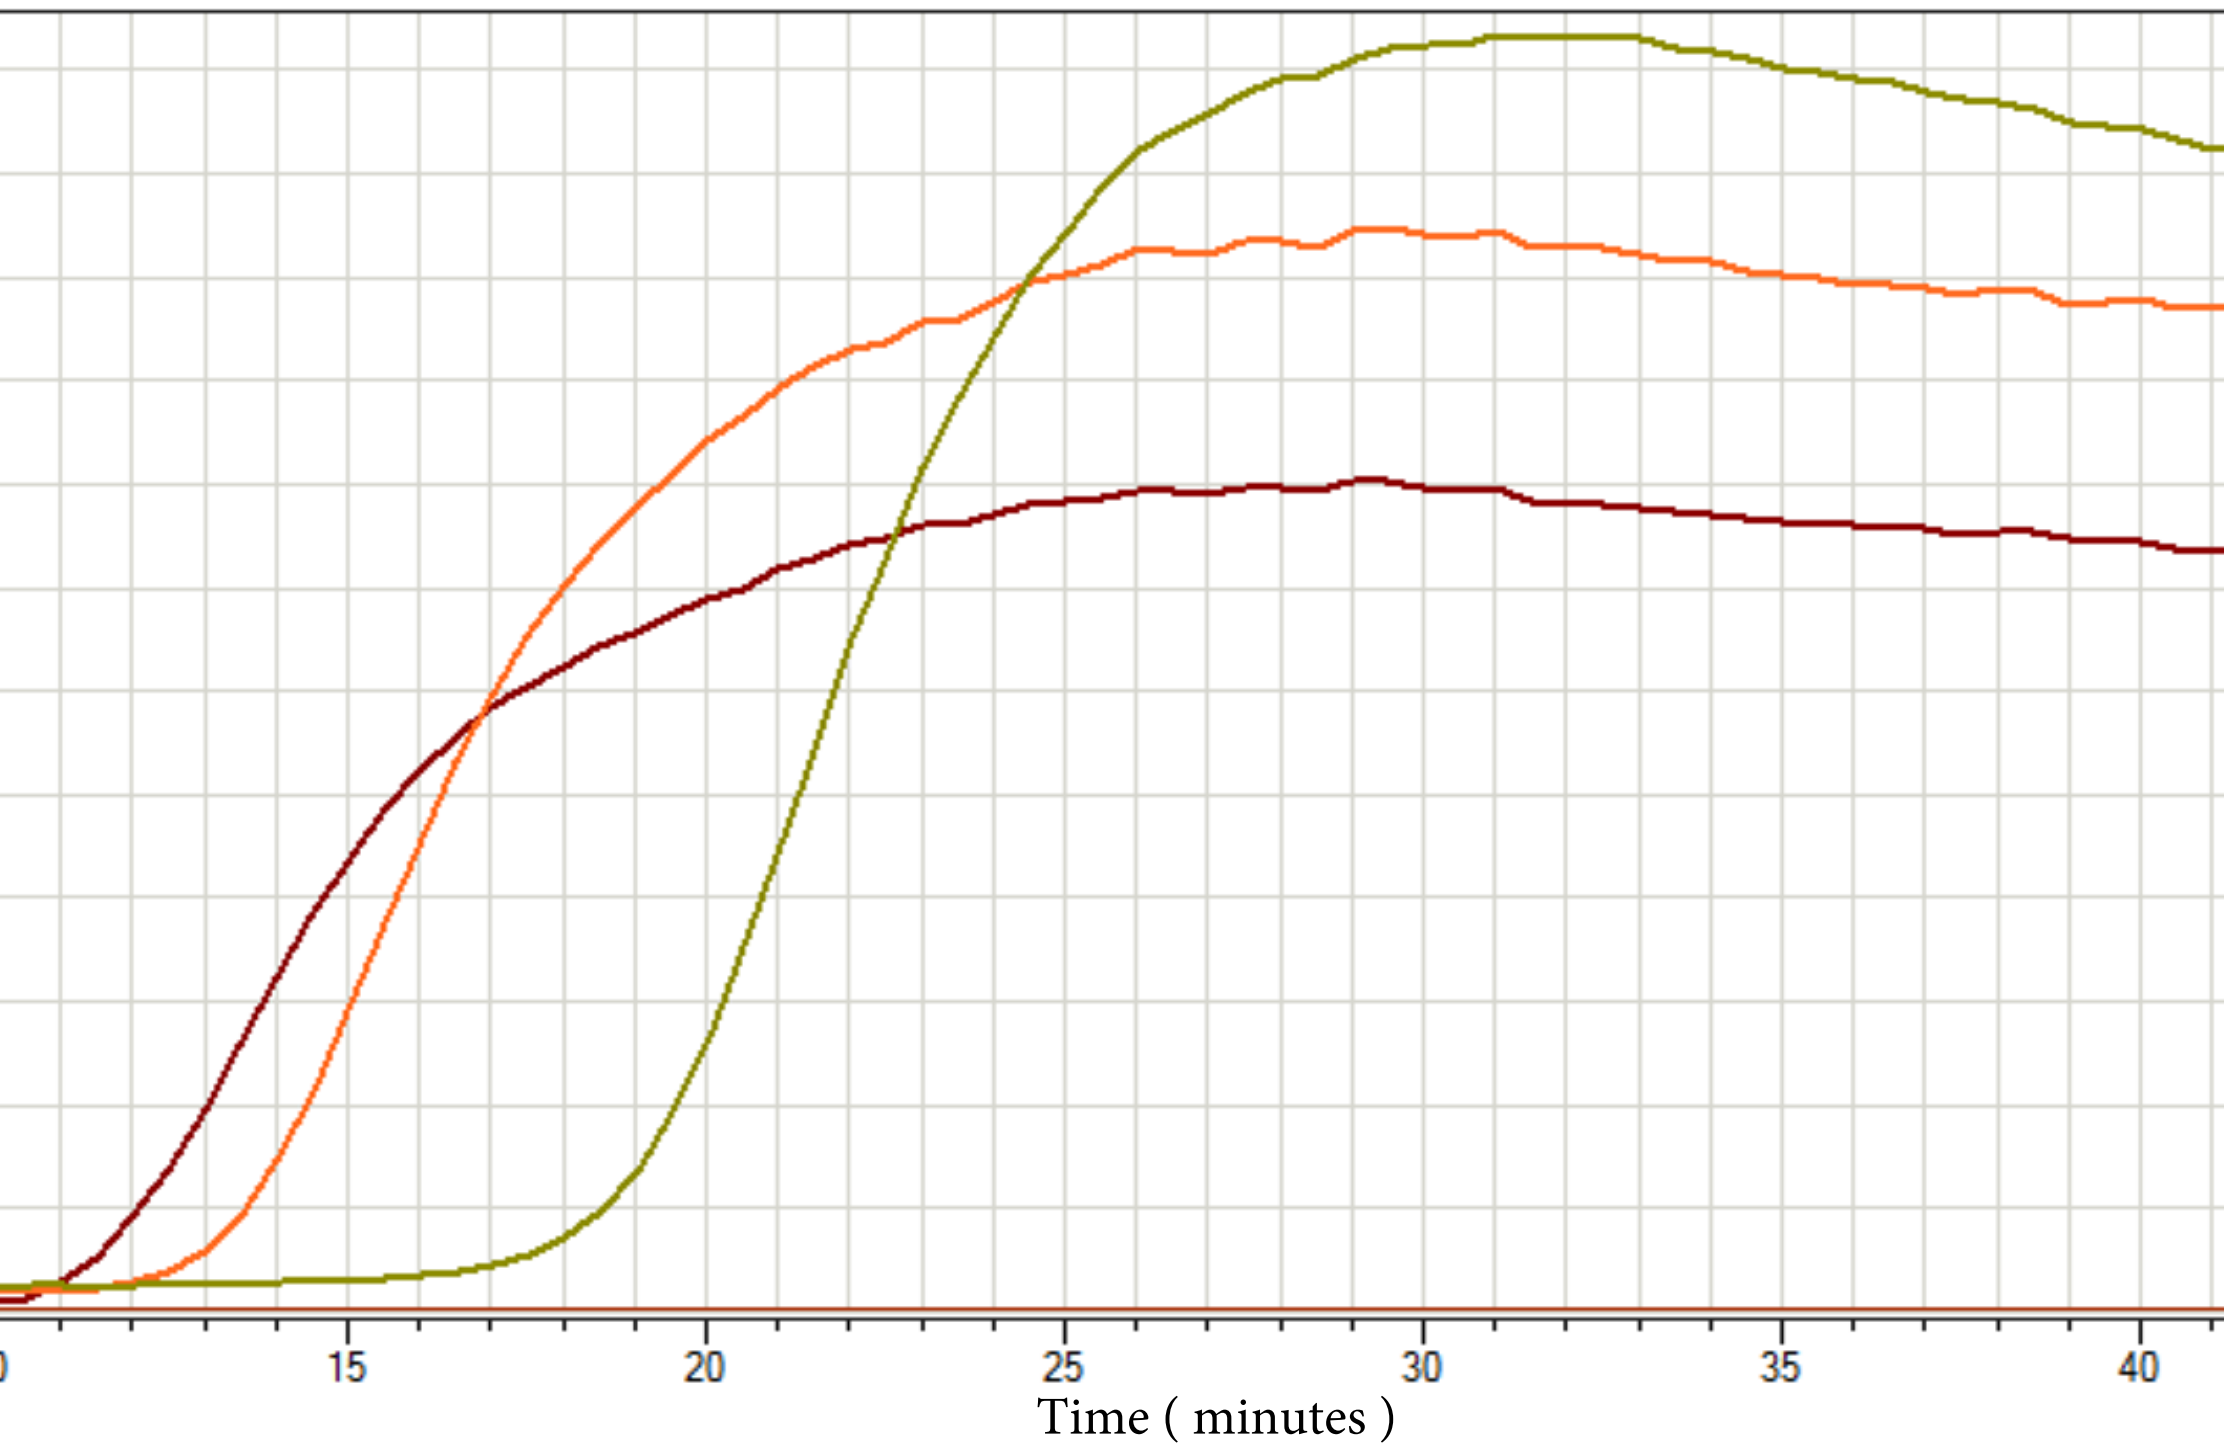

# Algorithm Processing Curve

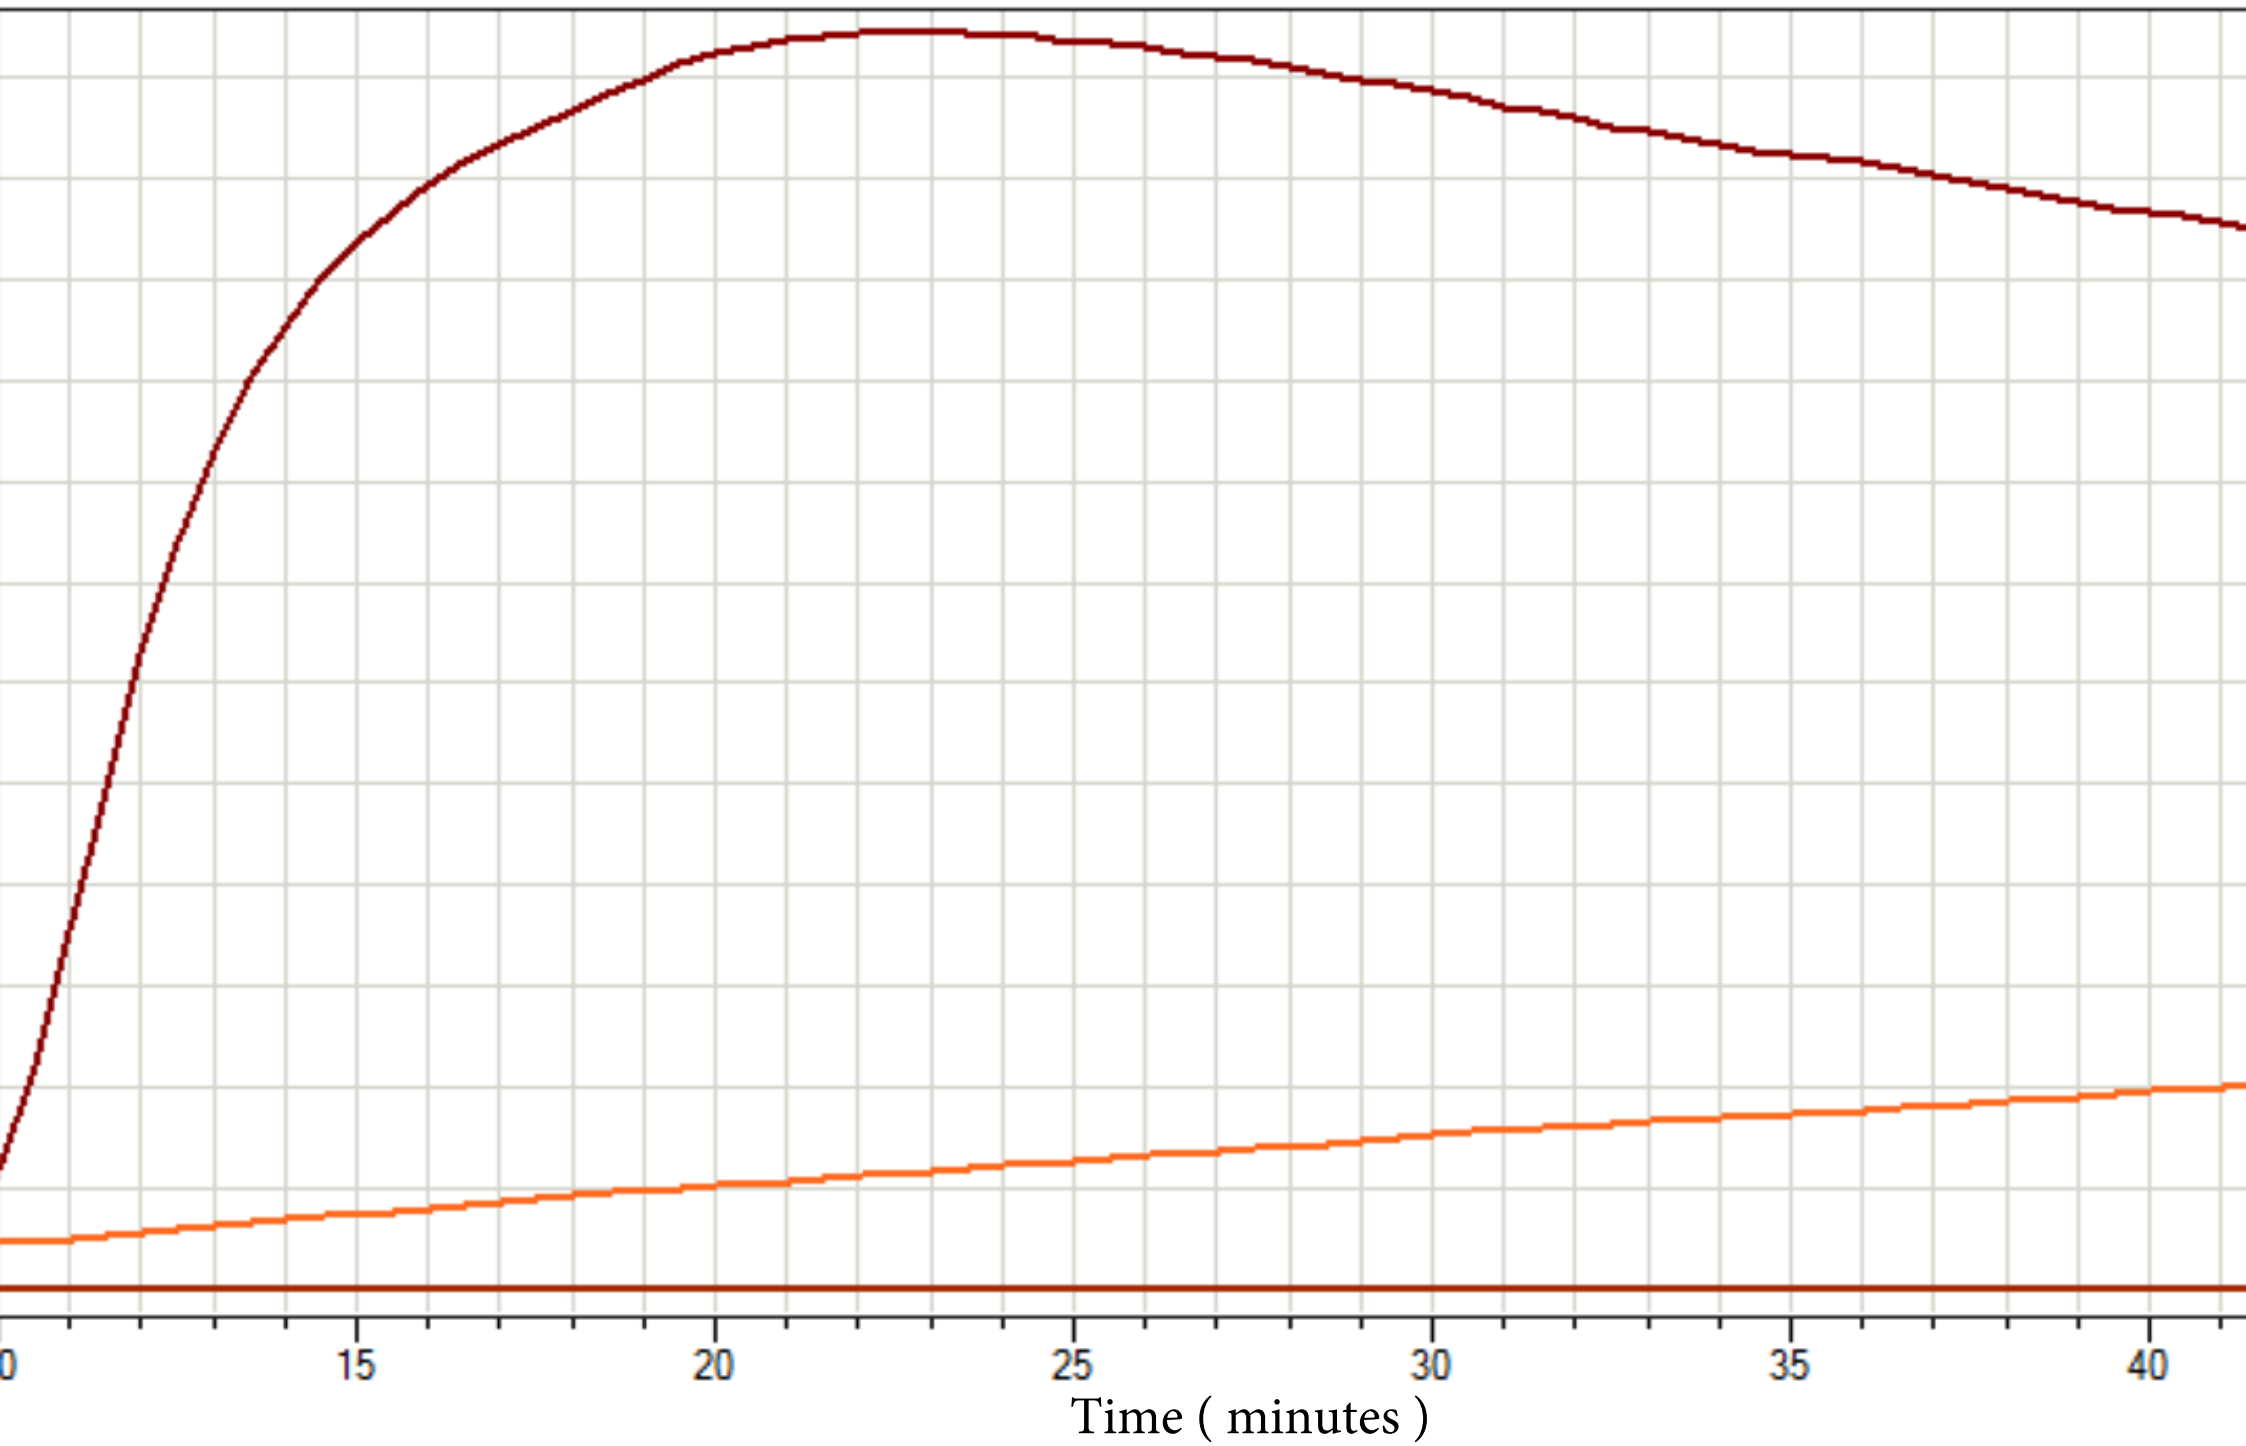

# Algorithm Processing Curve

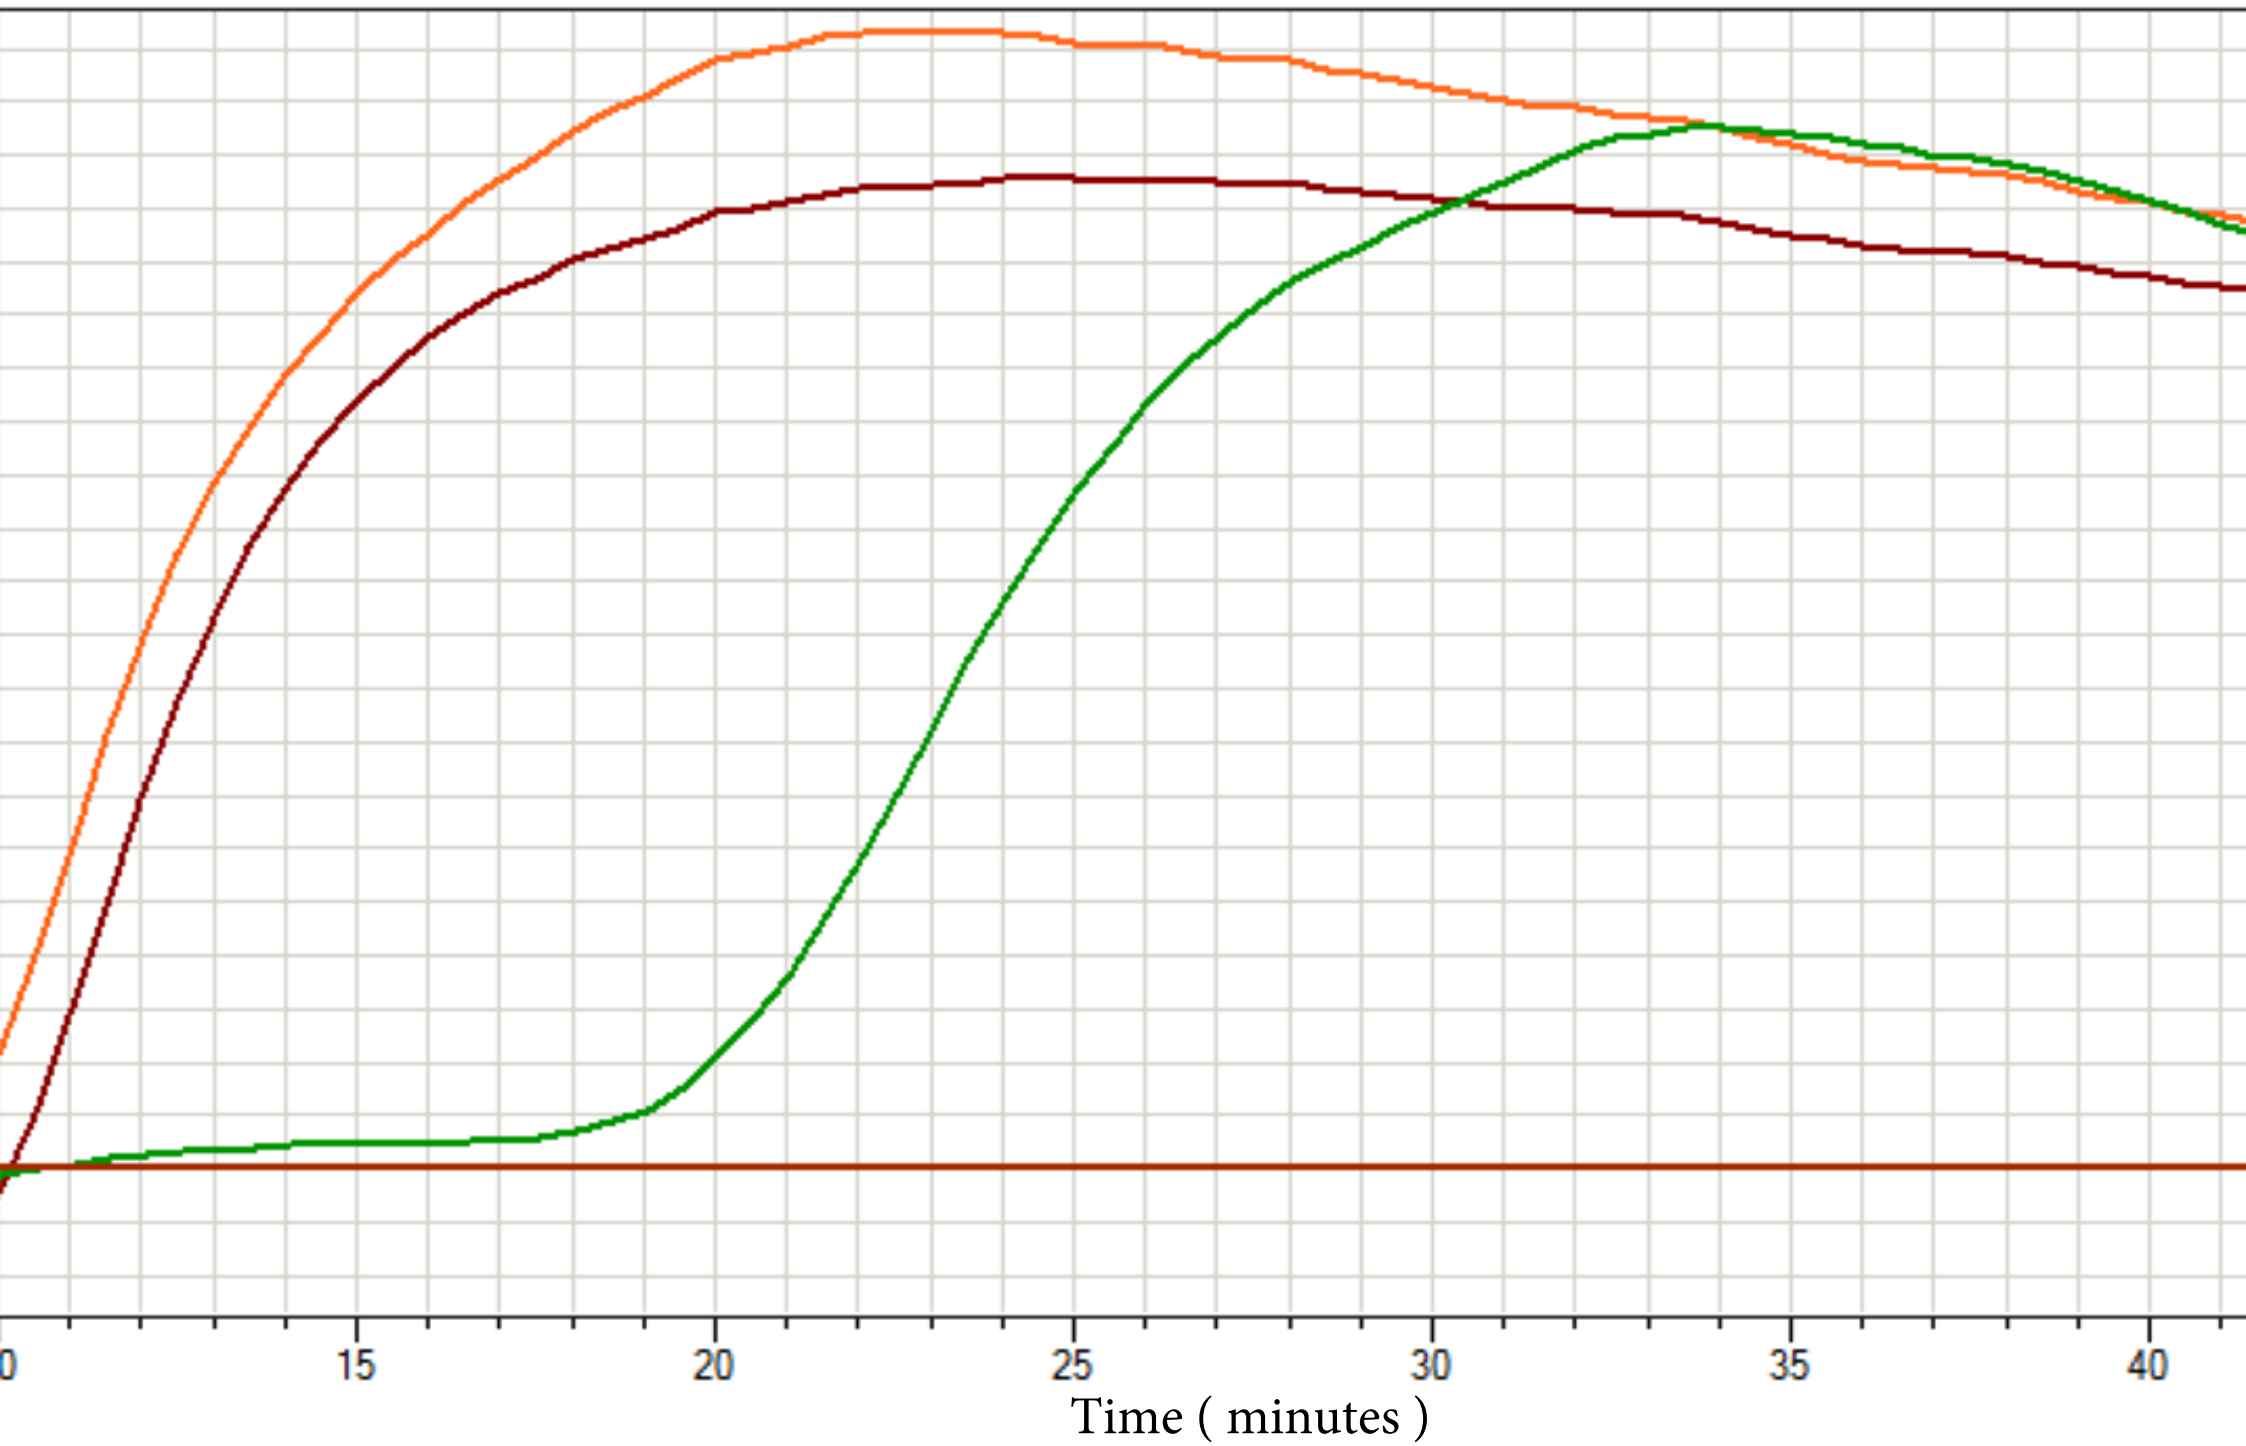

# Algorithm Processing Curve

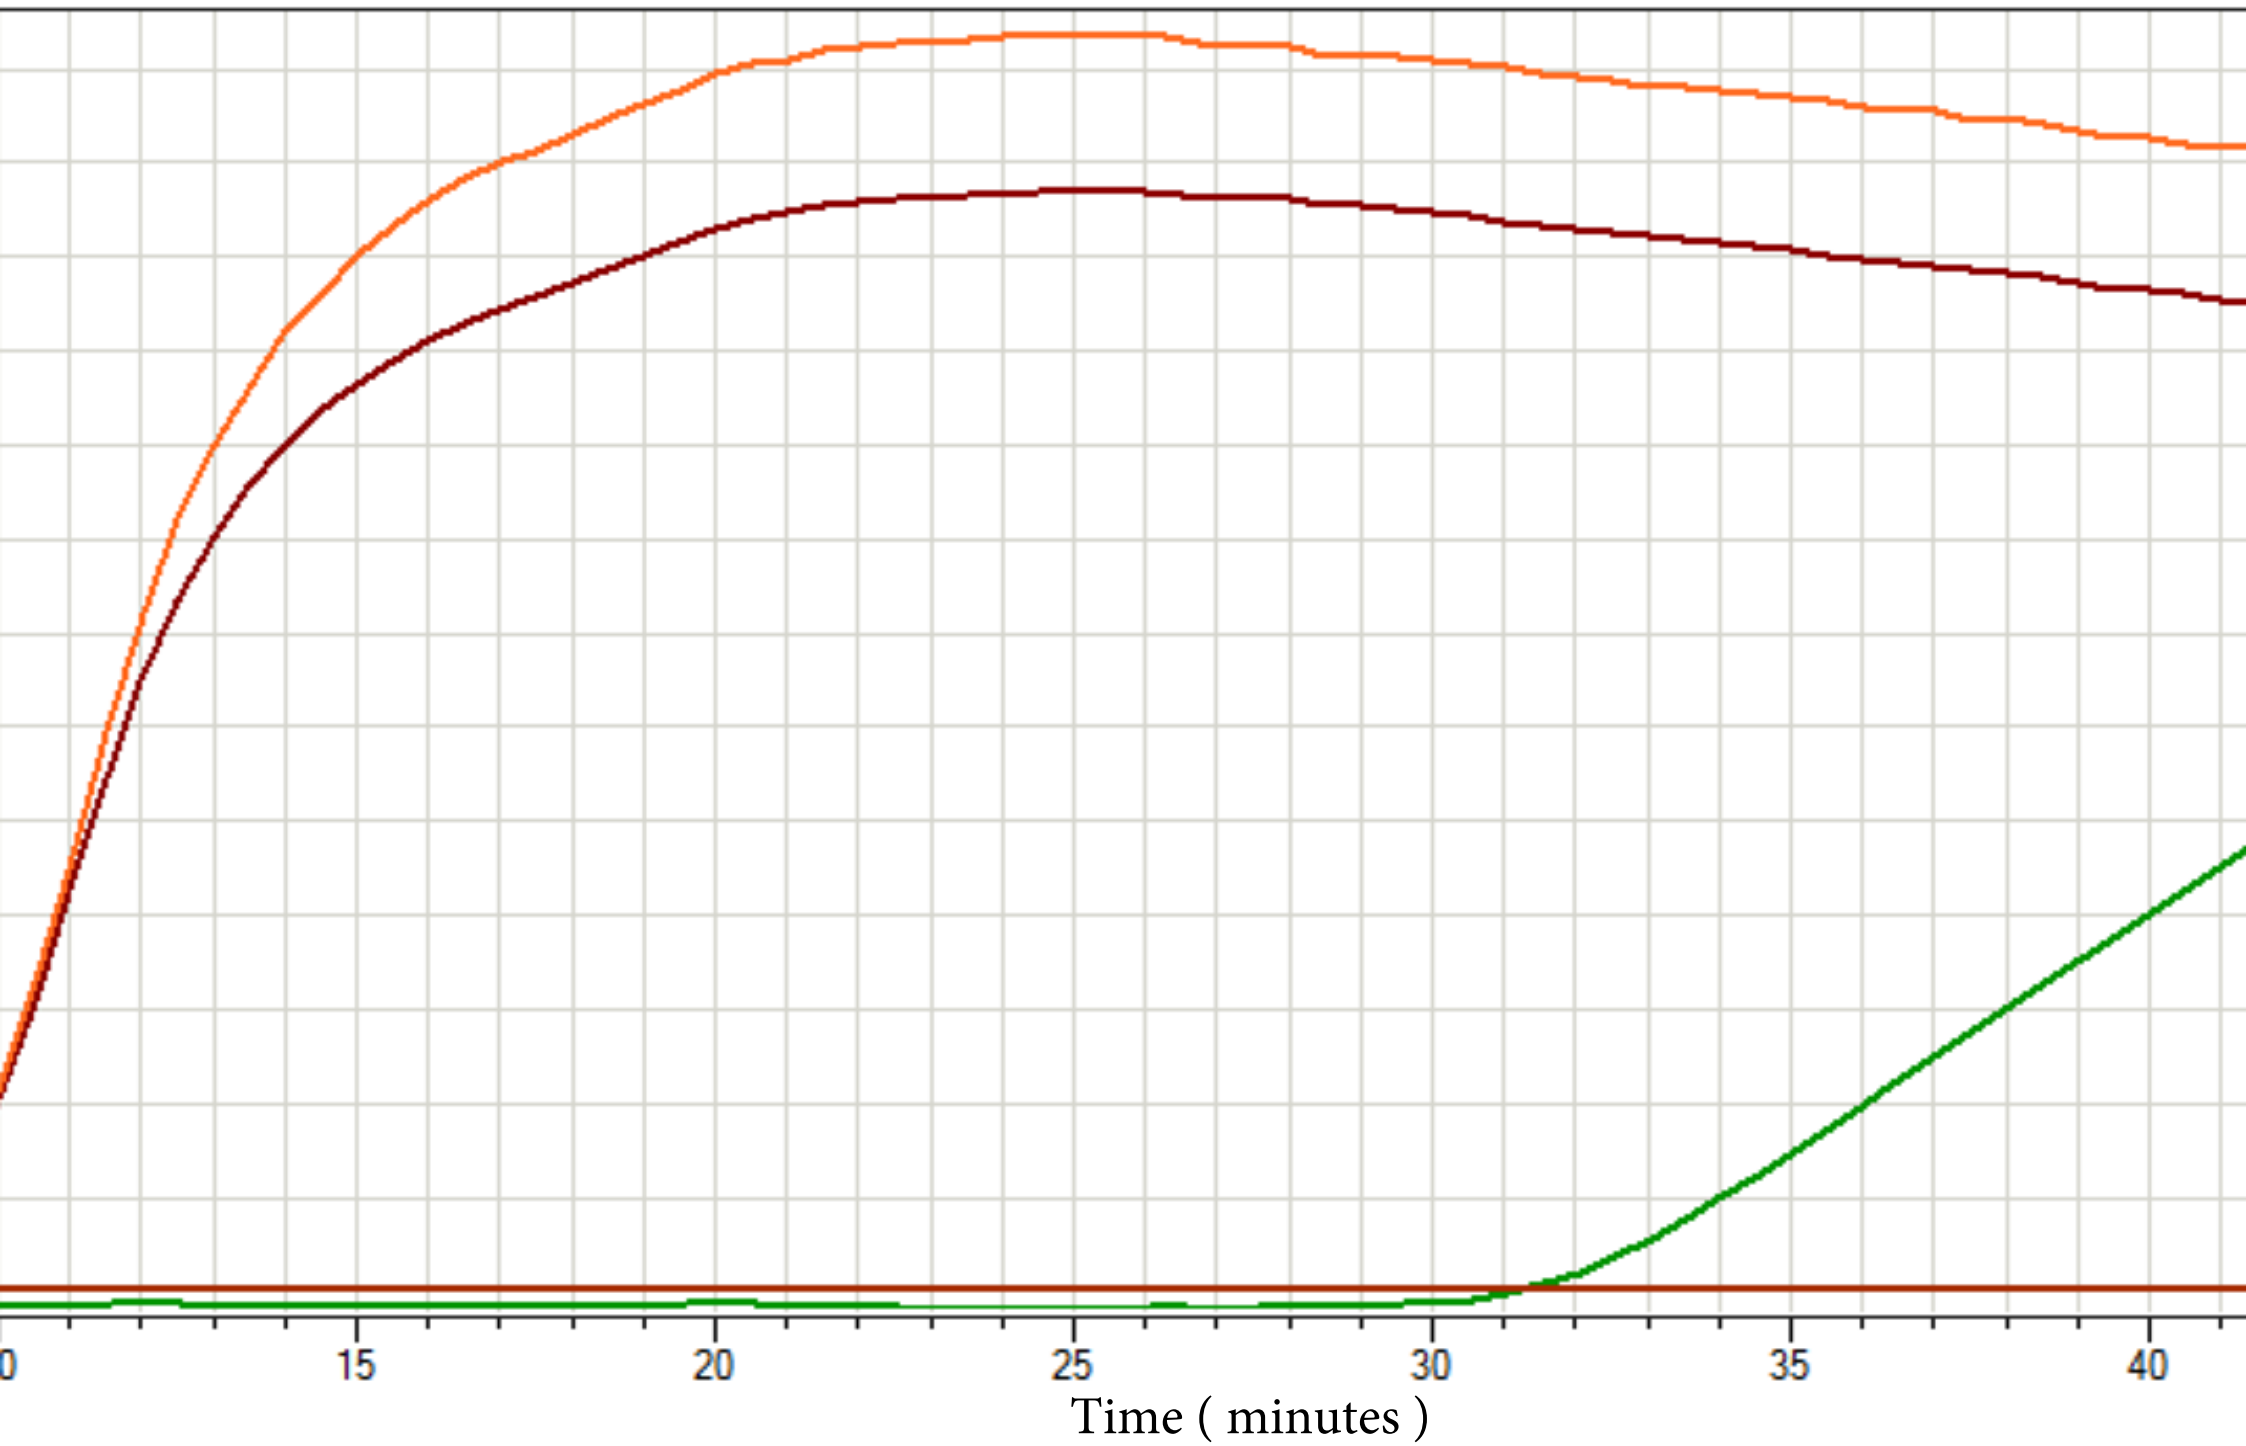

# Algorithm Processing Curve

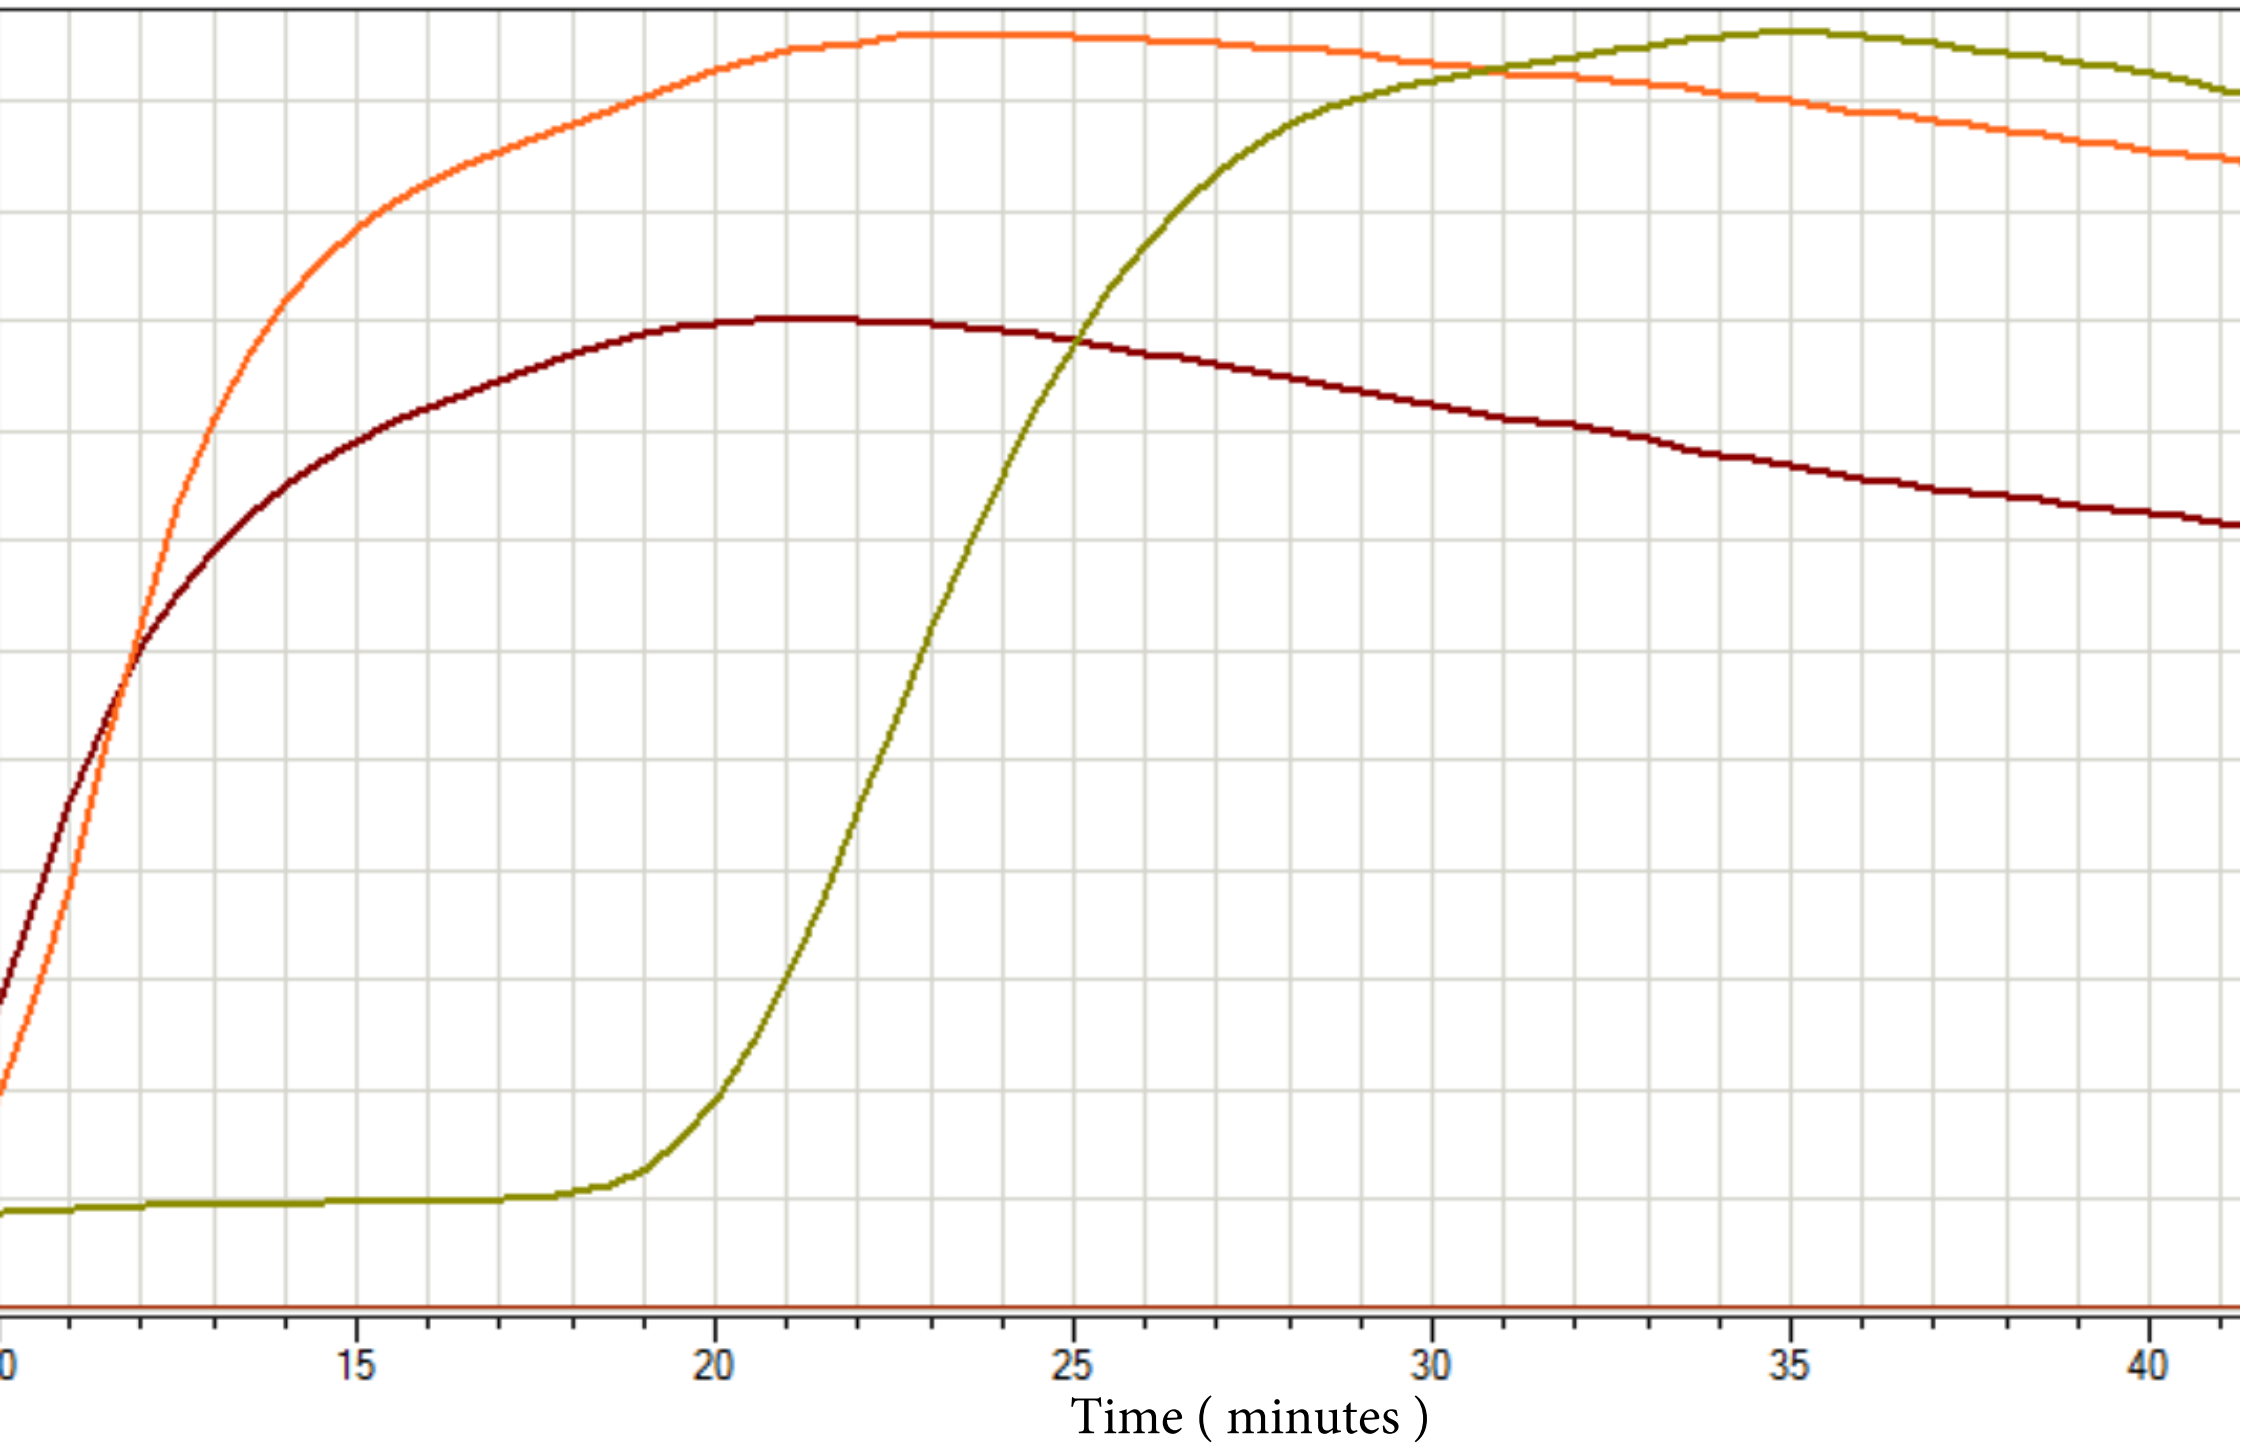

# Algorithm Processing Curve

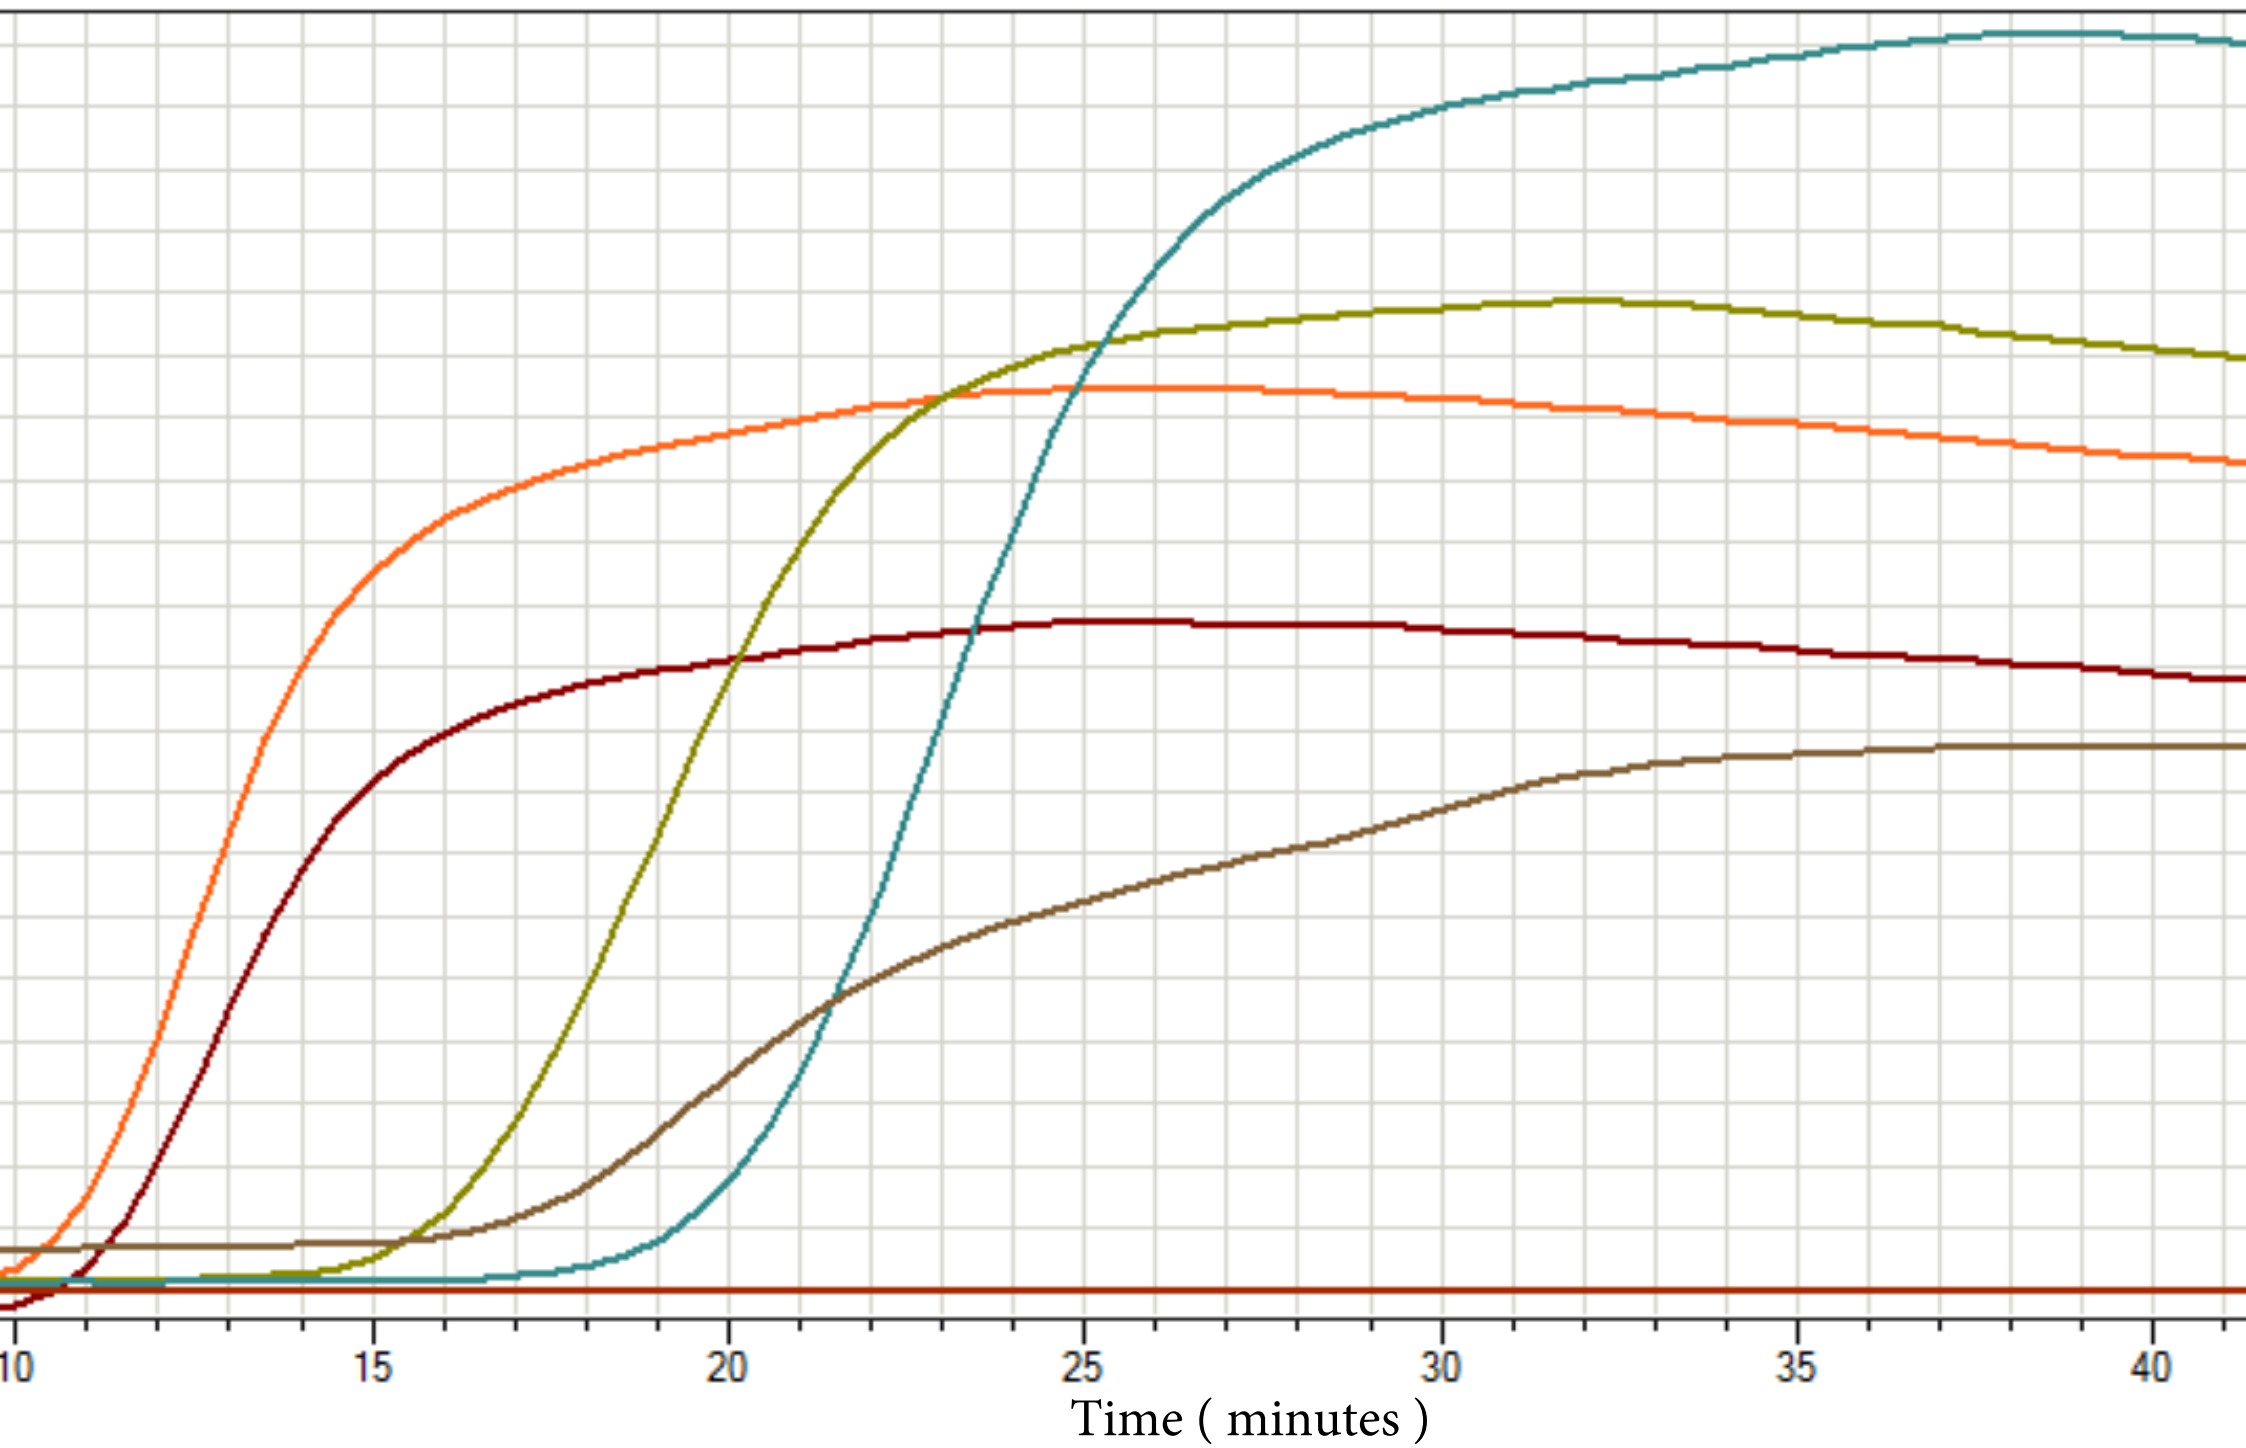

# Algorithm Processing Curve

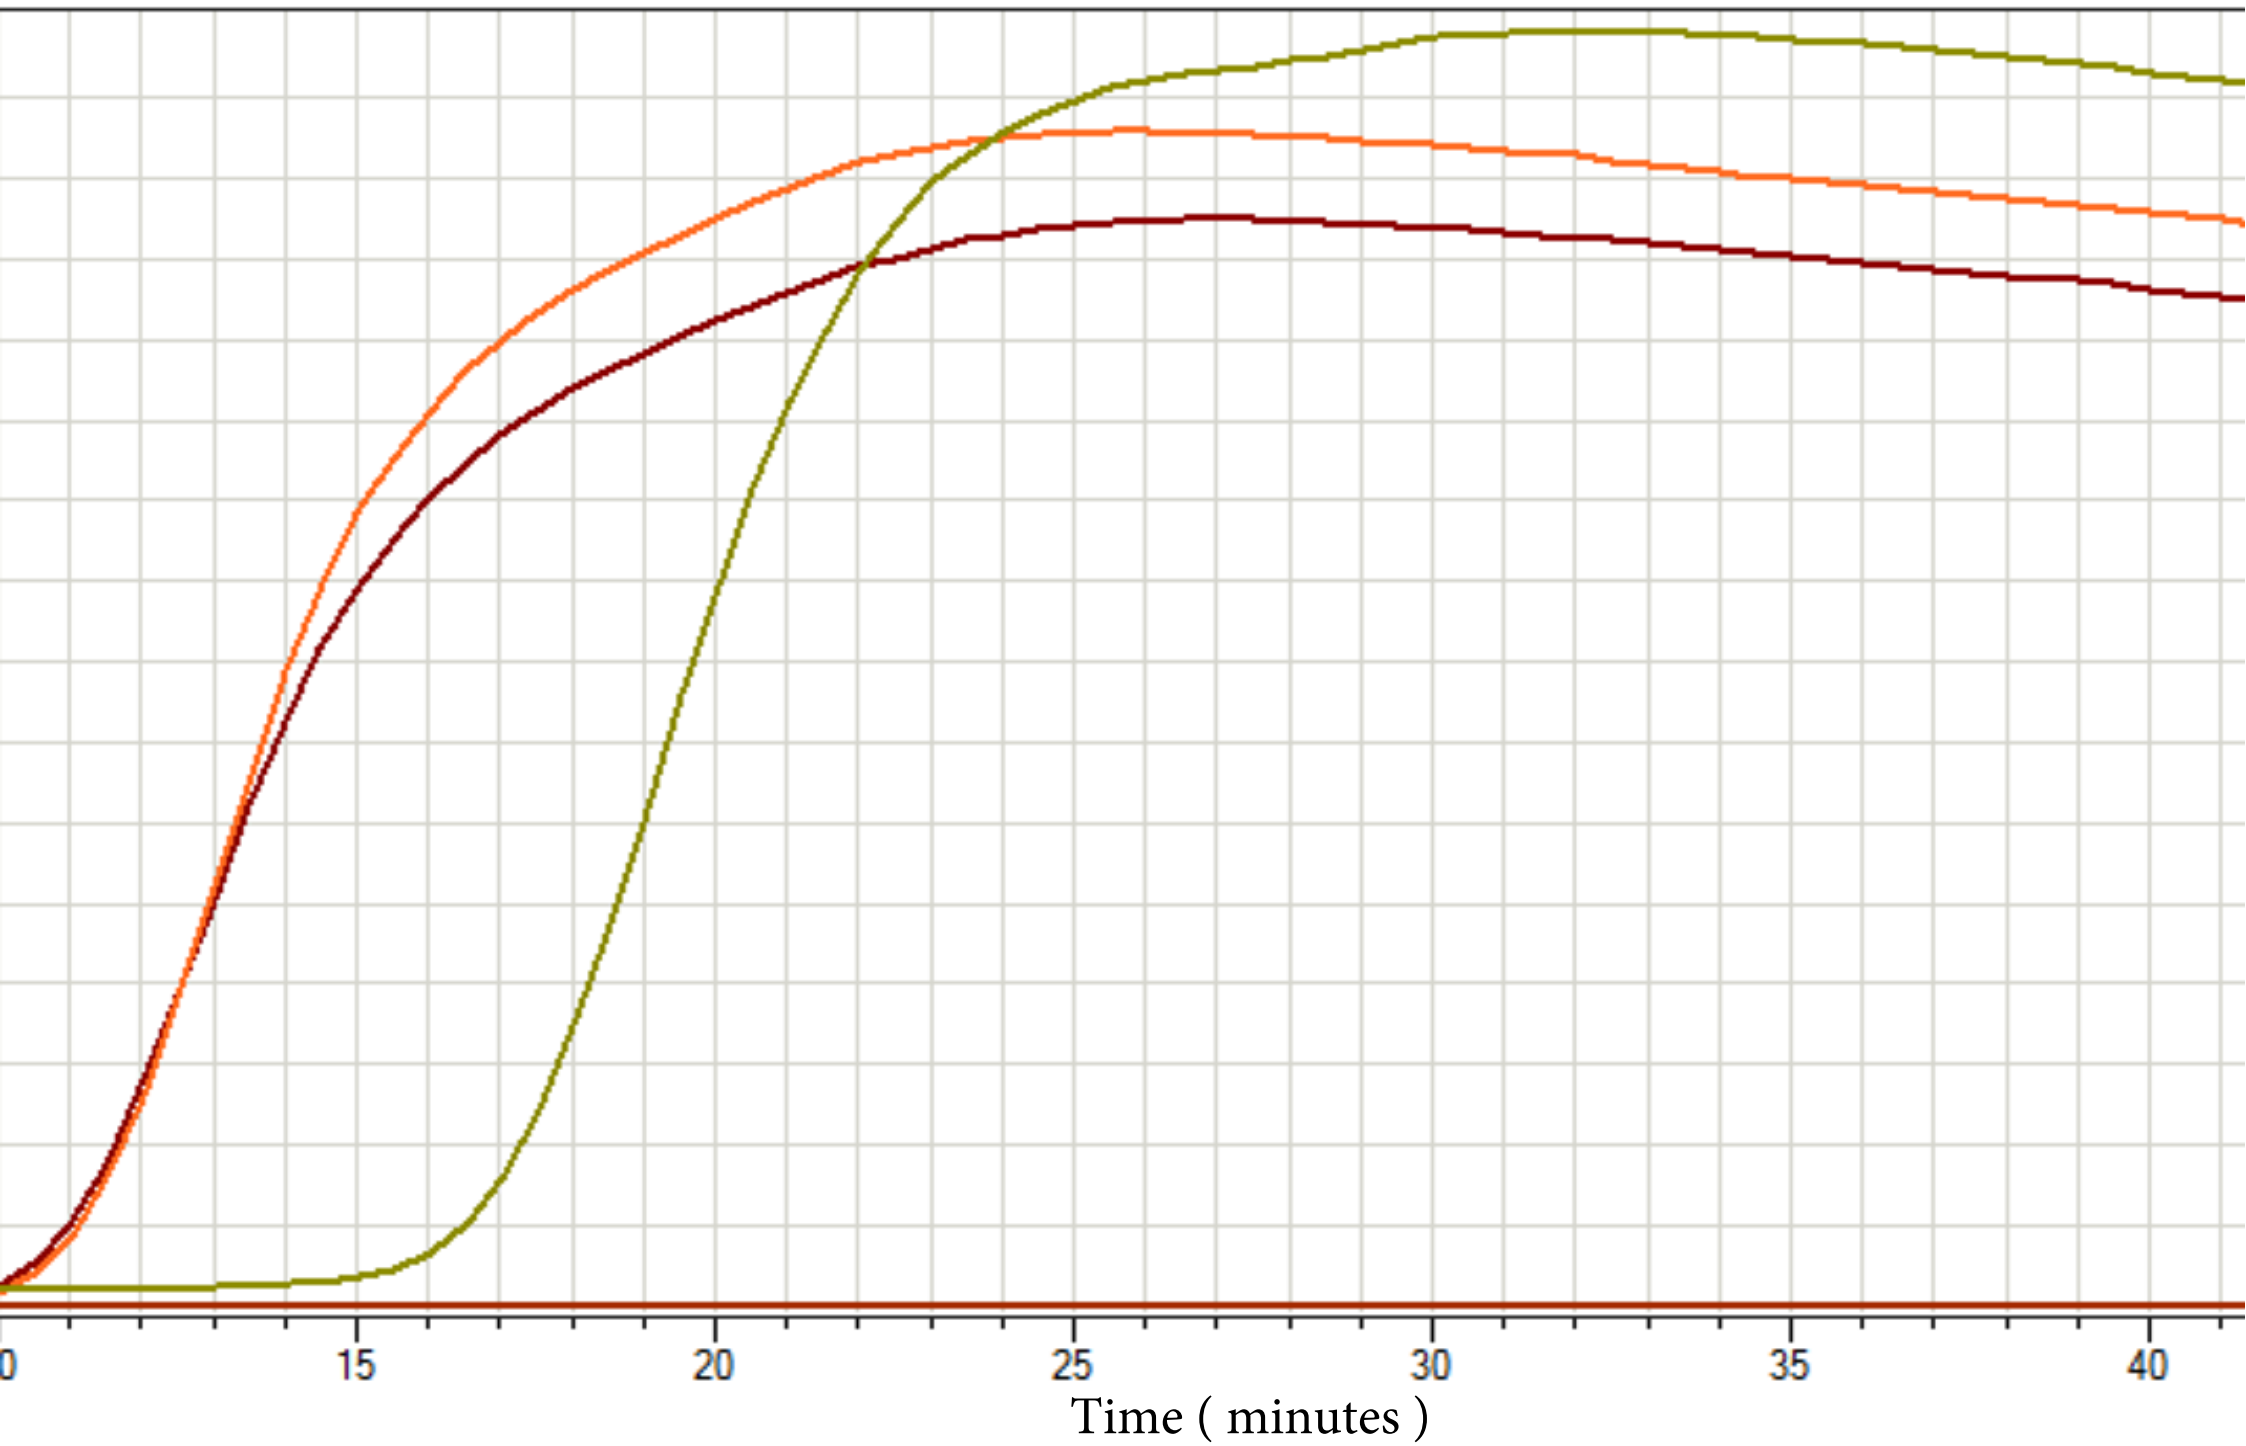



# Algorithm Processing Curve

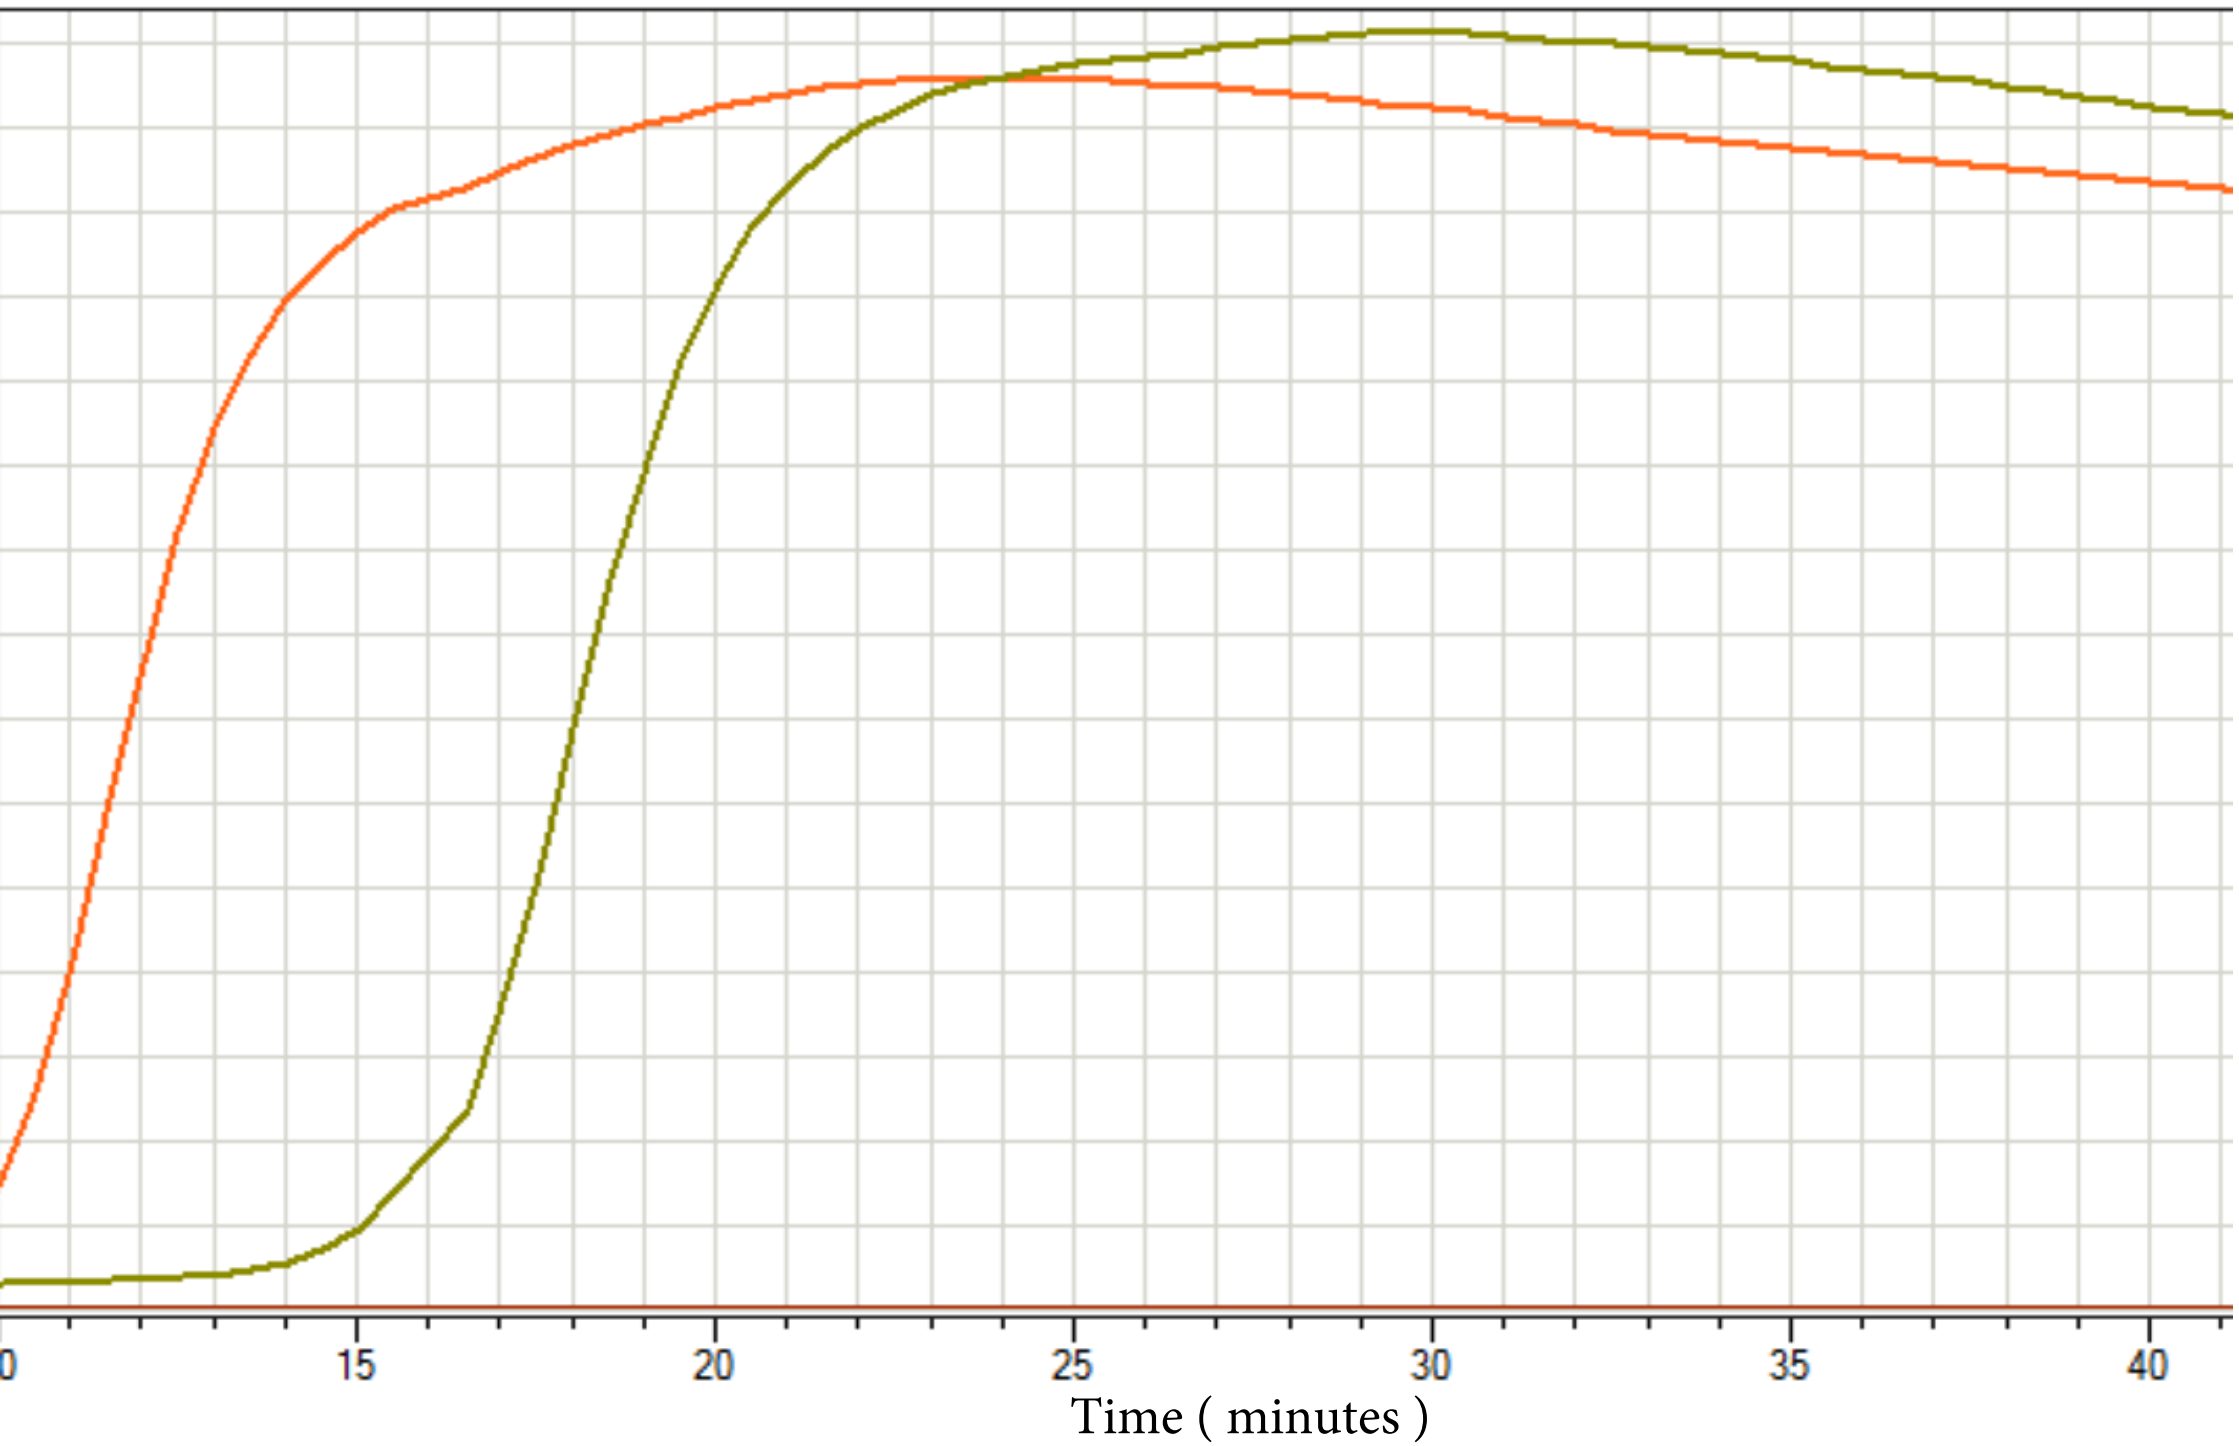

# Algorithm Processing Curve

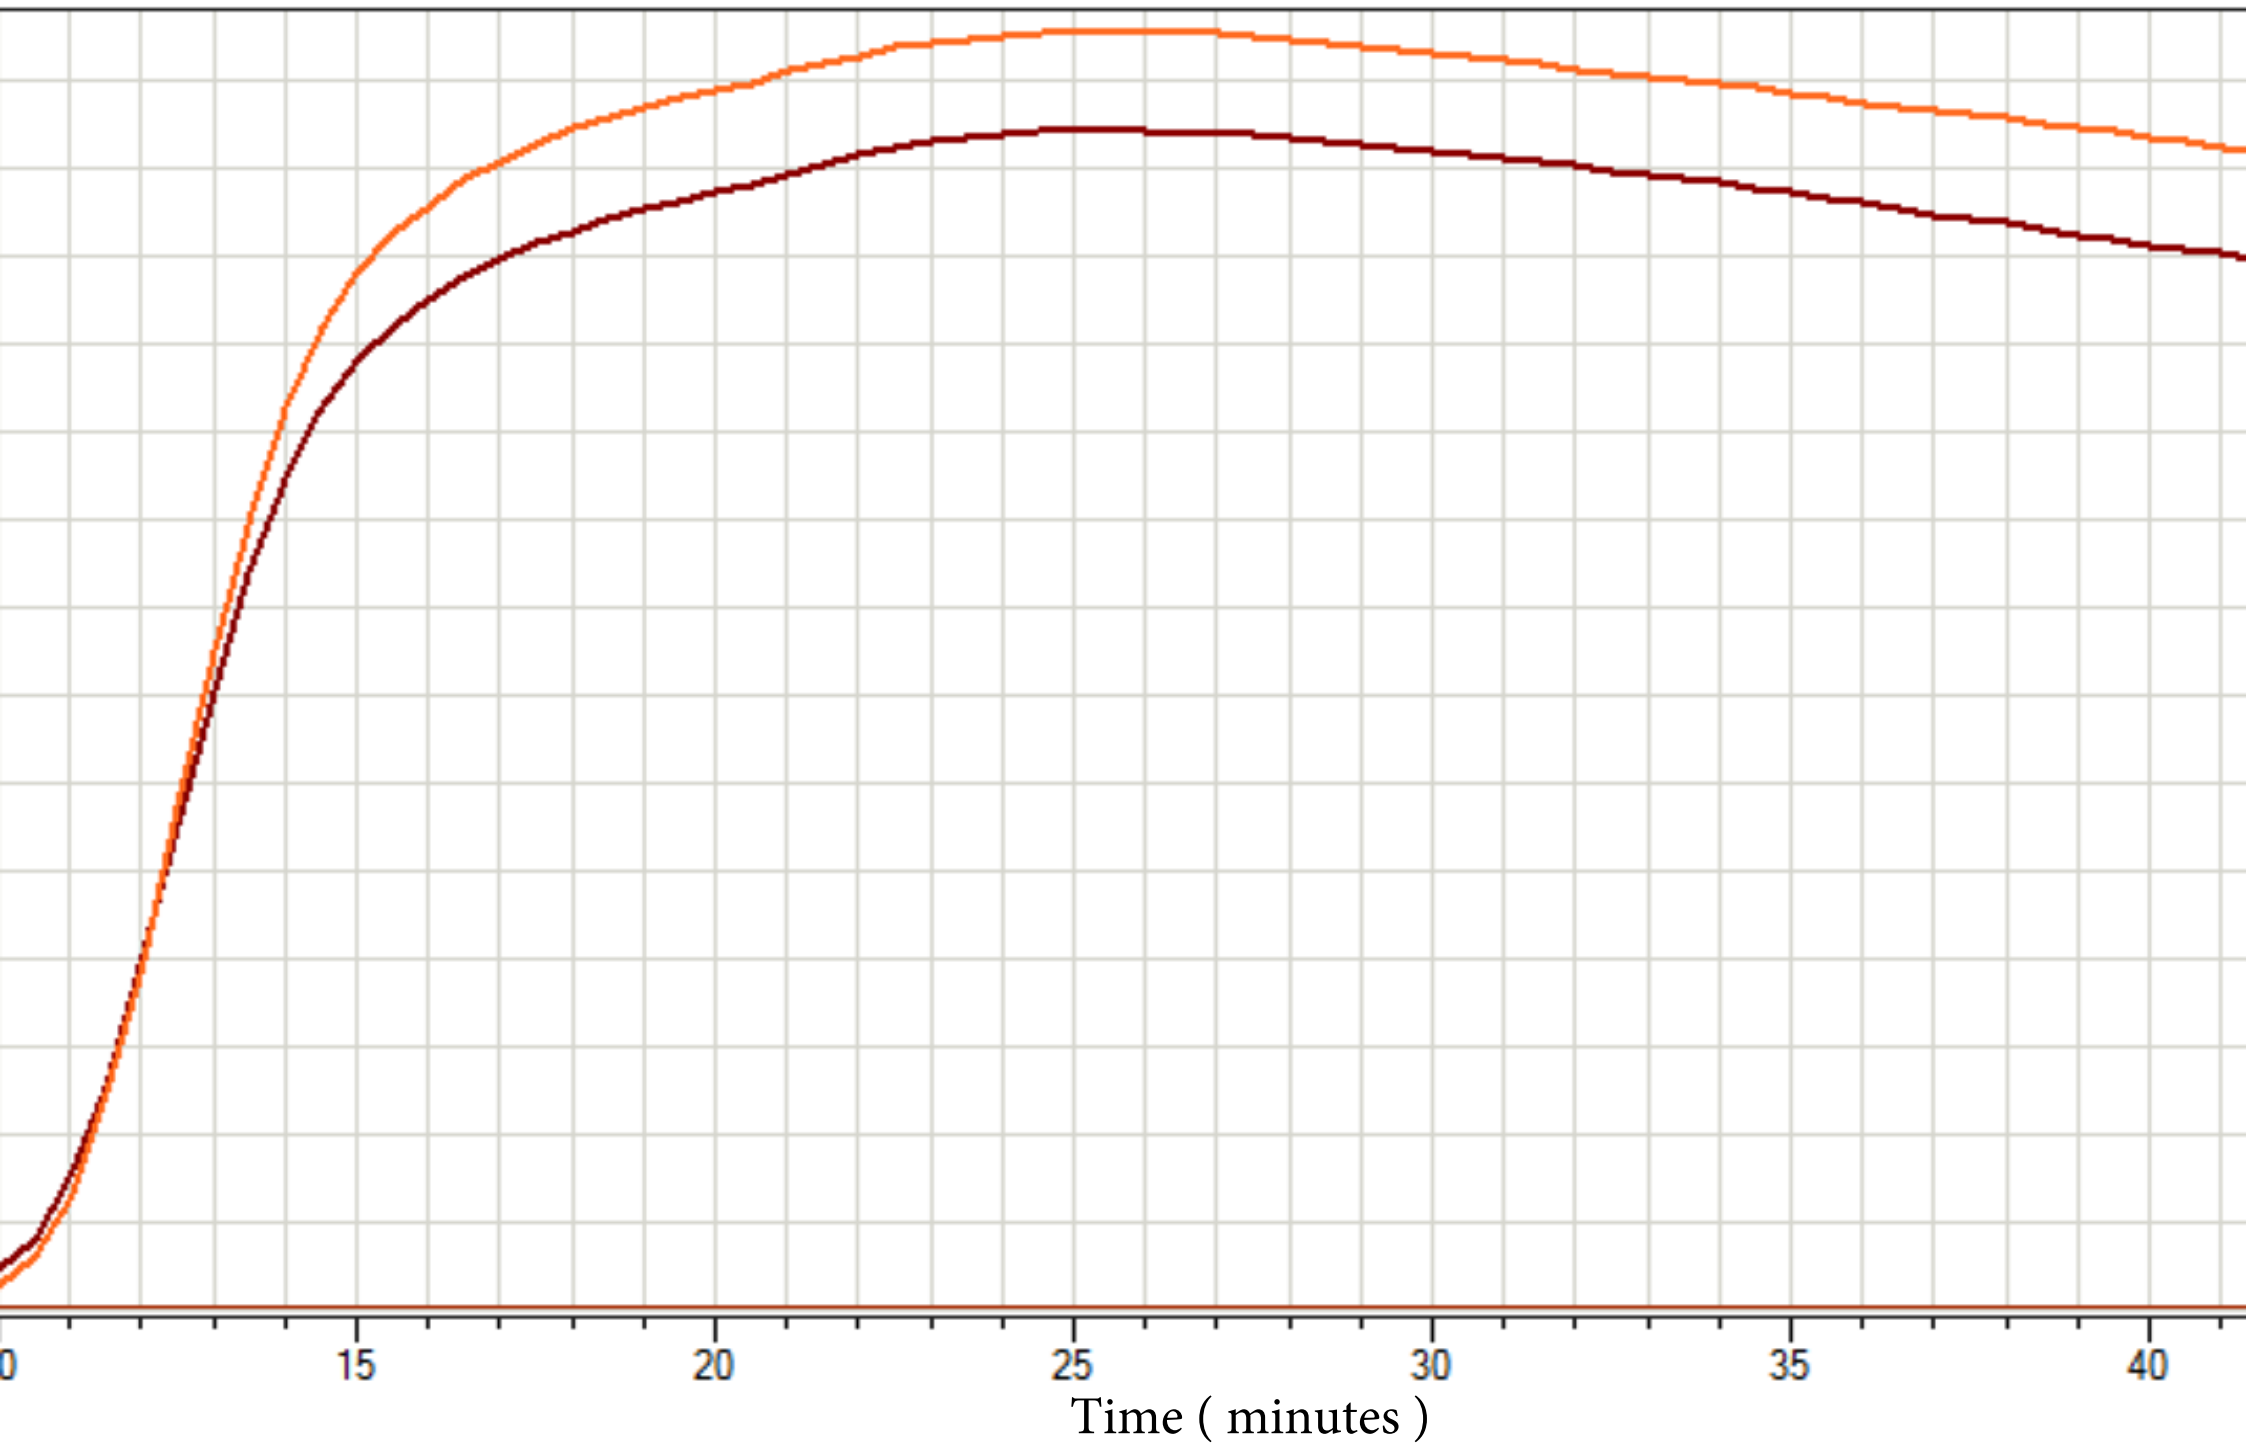

# Algorithm Processing Curve

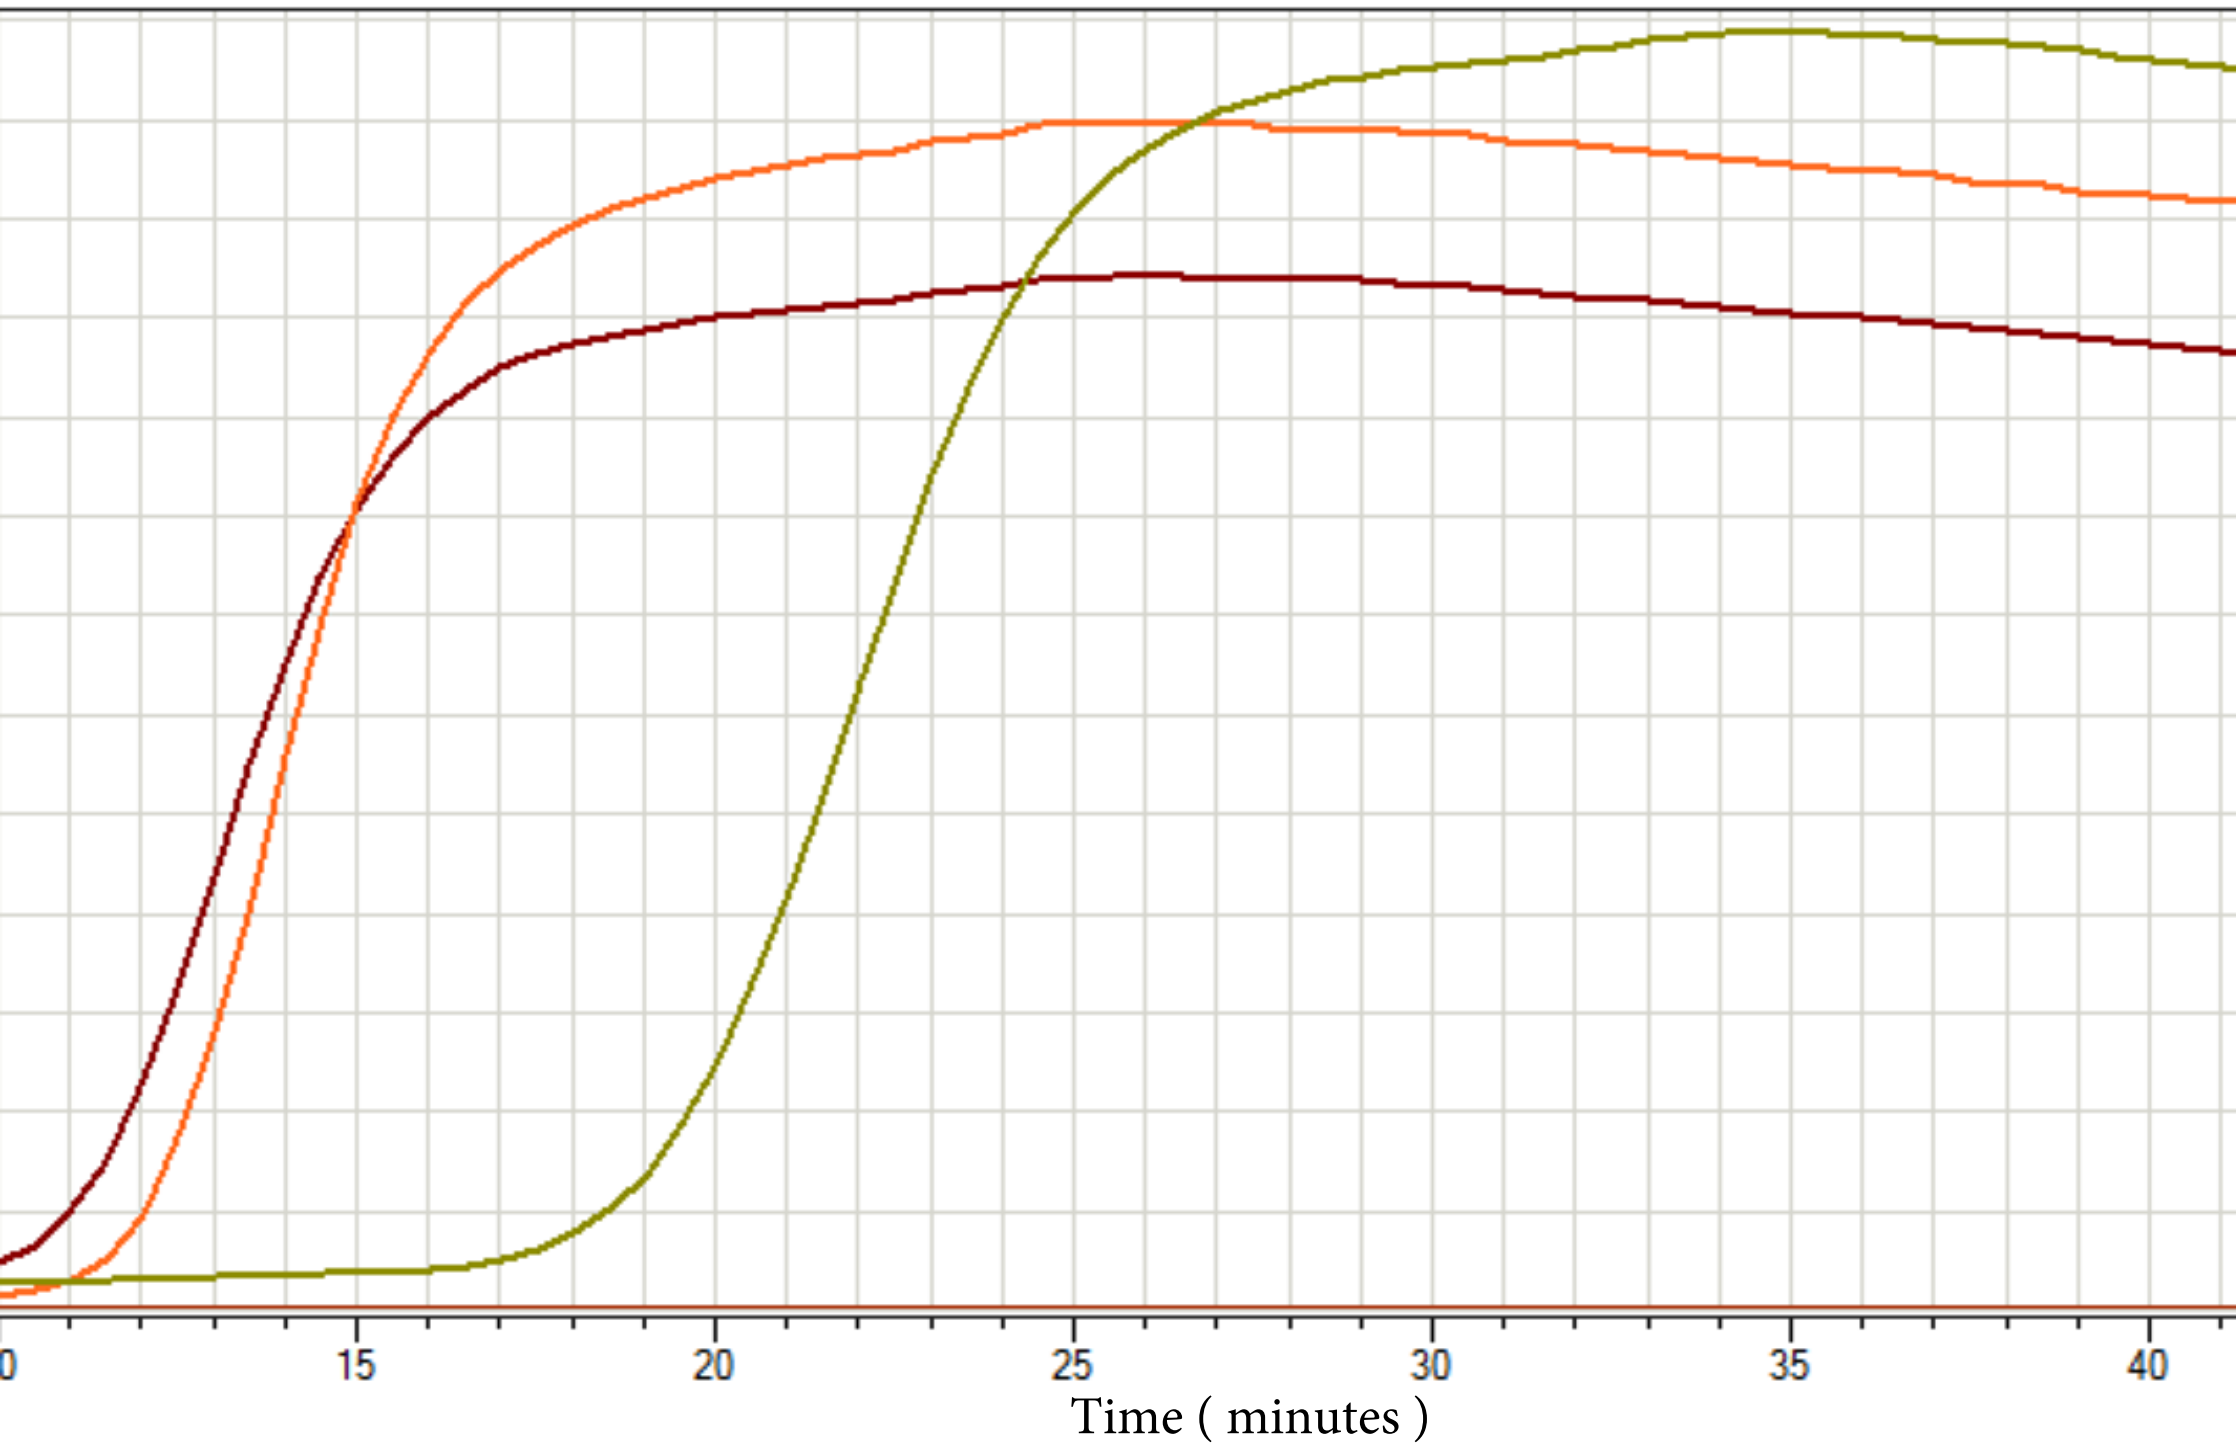

# Algorithm Processing Curve

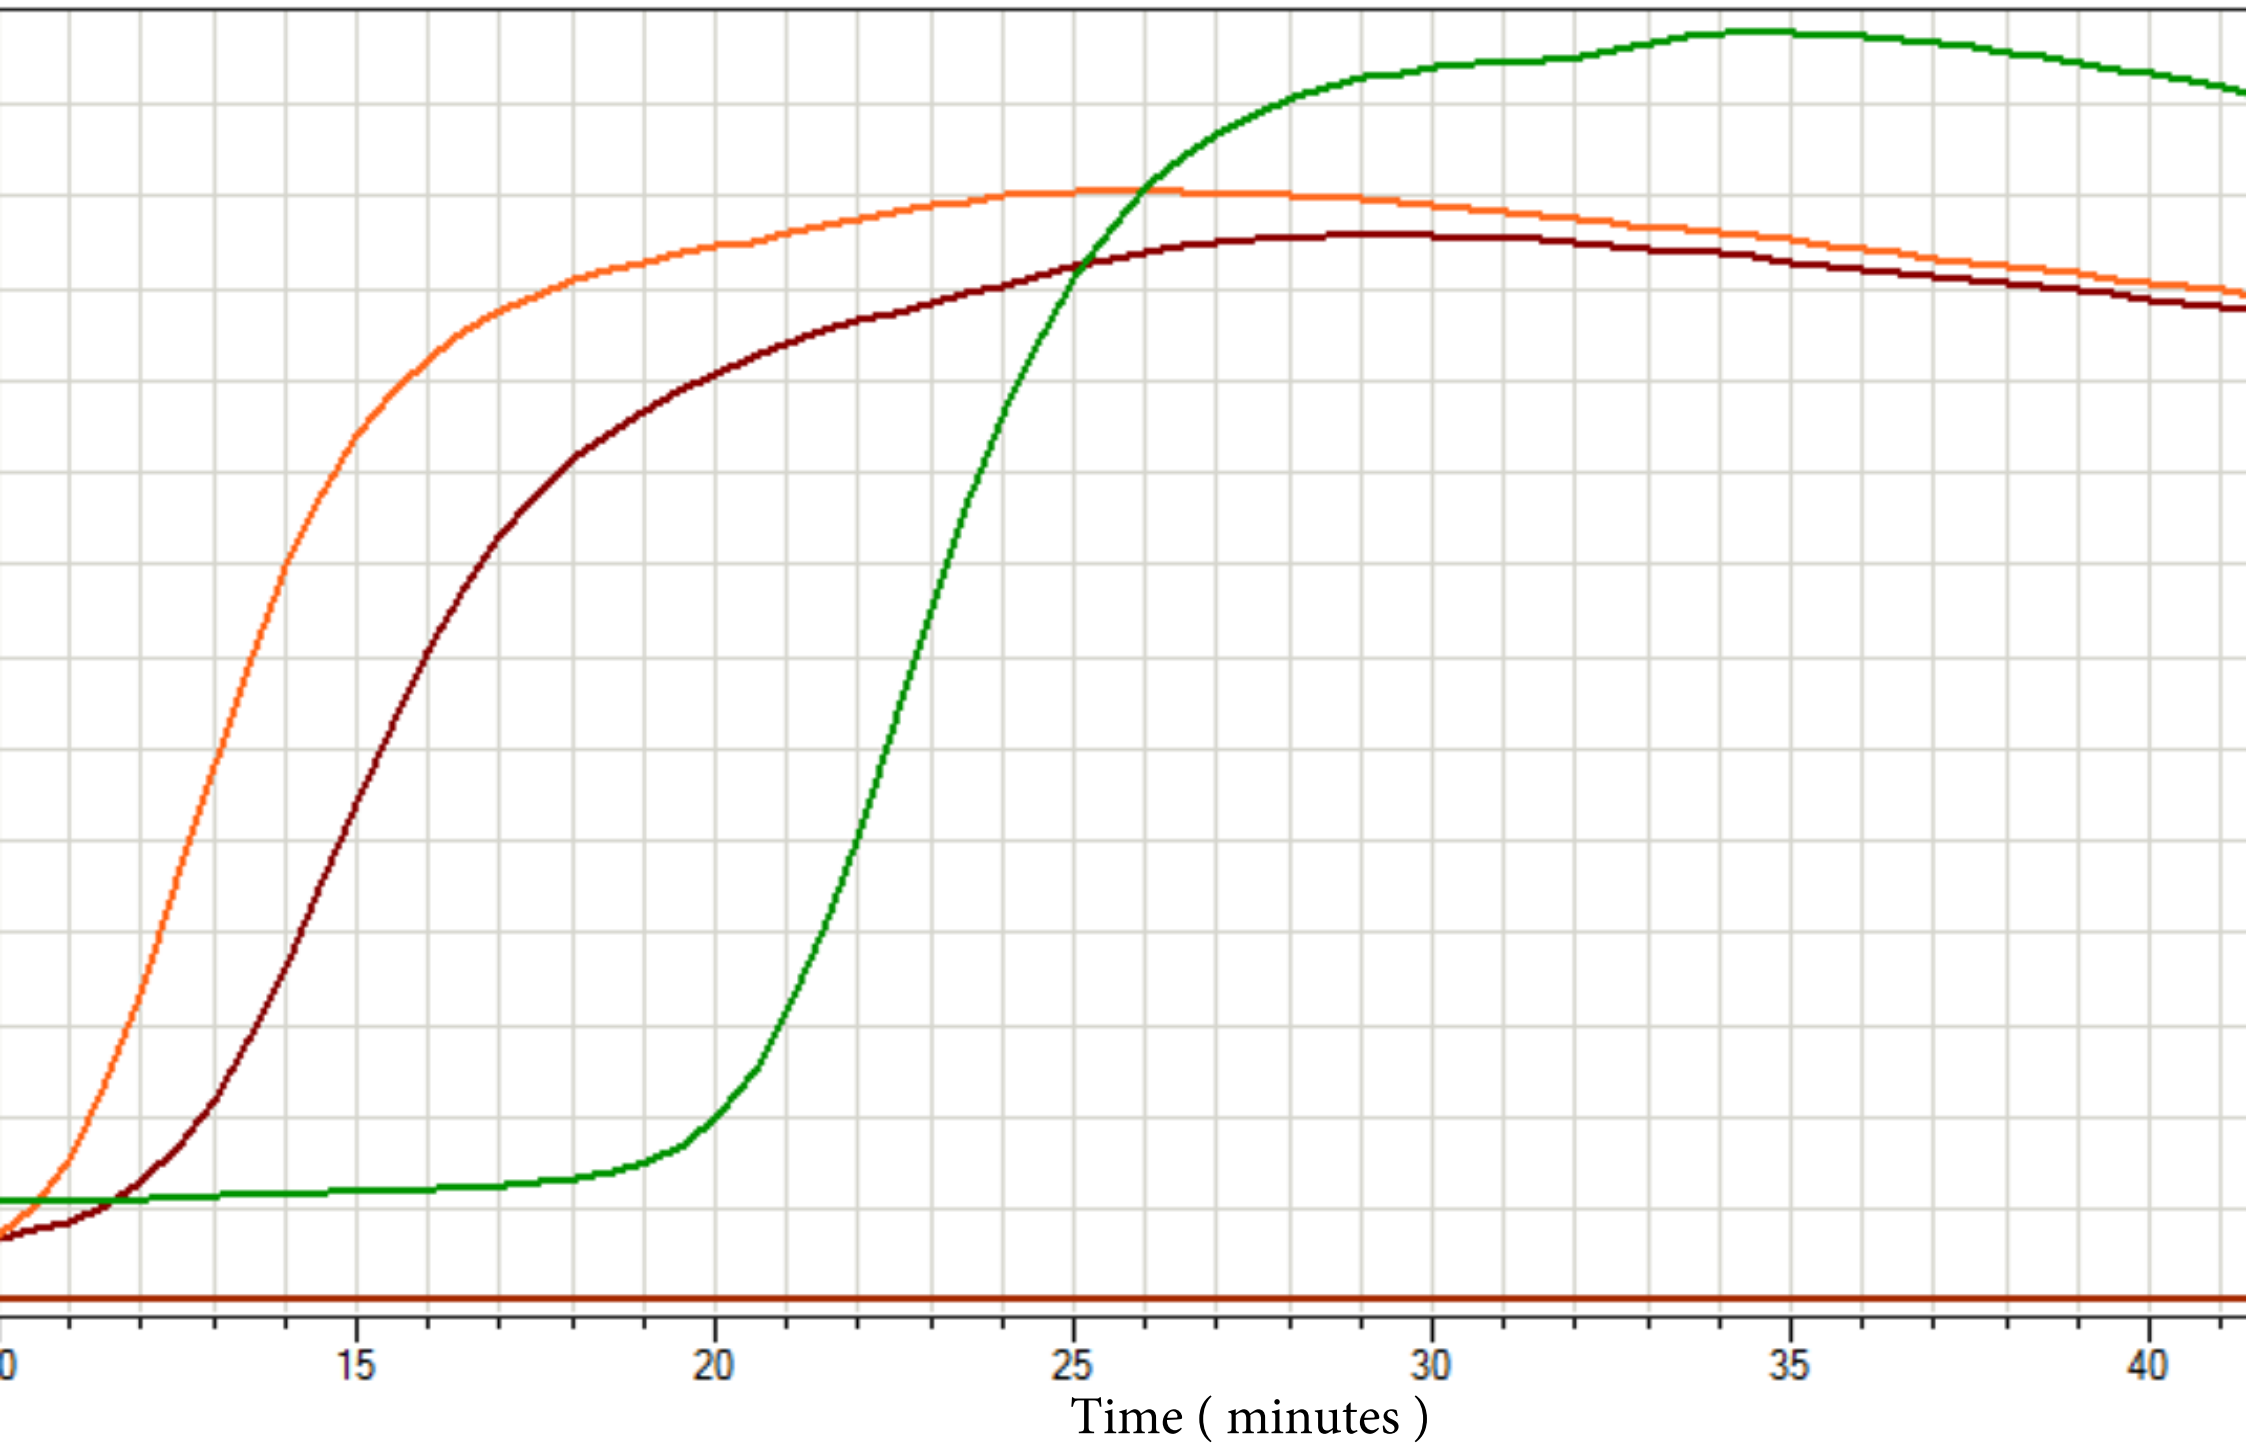

# Algorithm Processing Curve

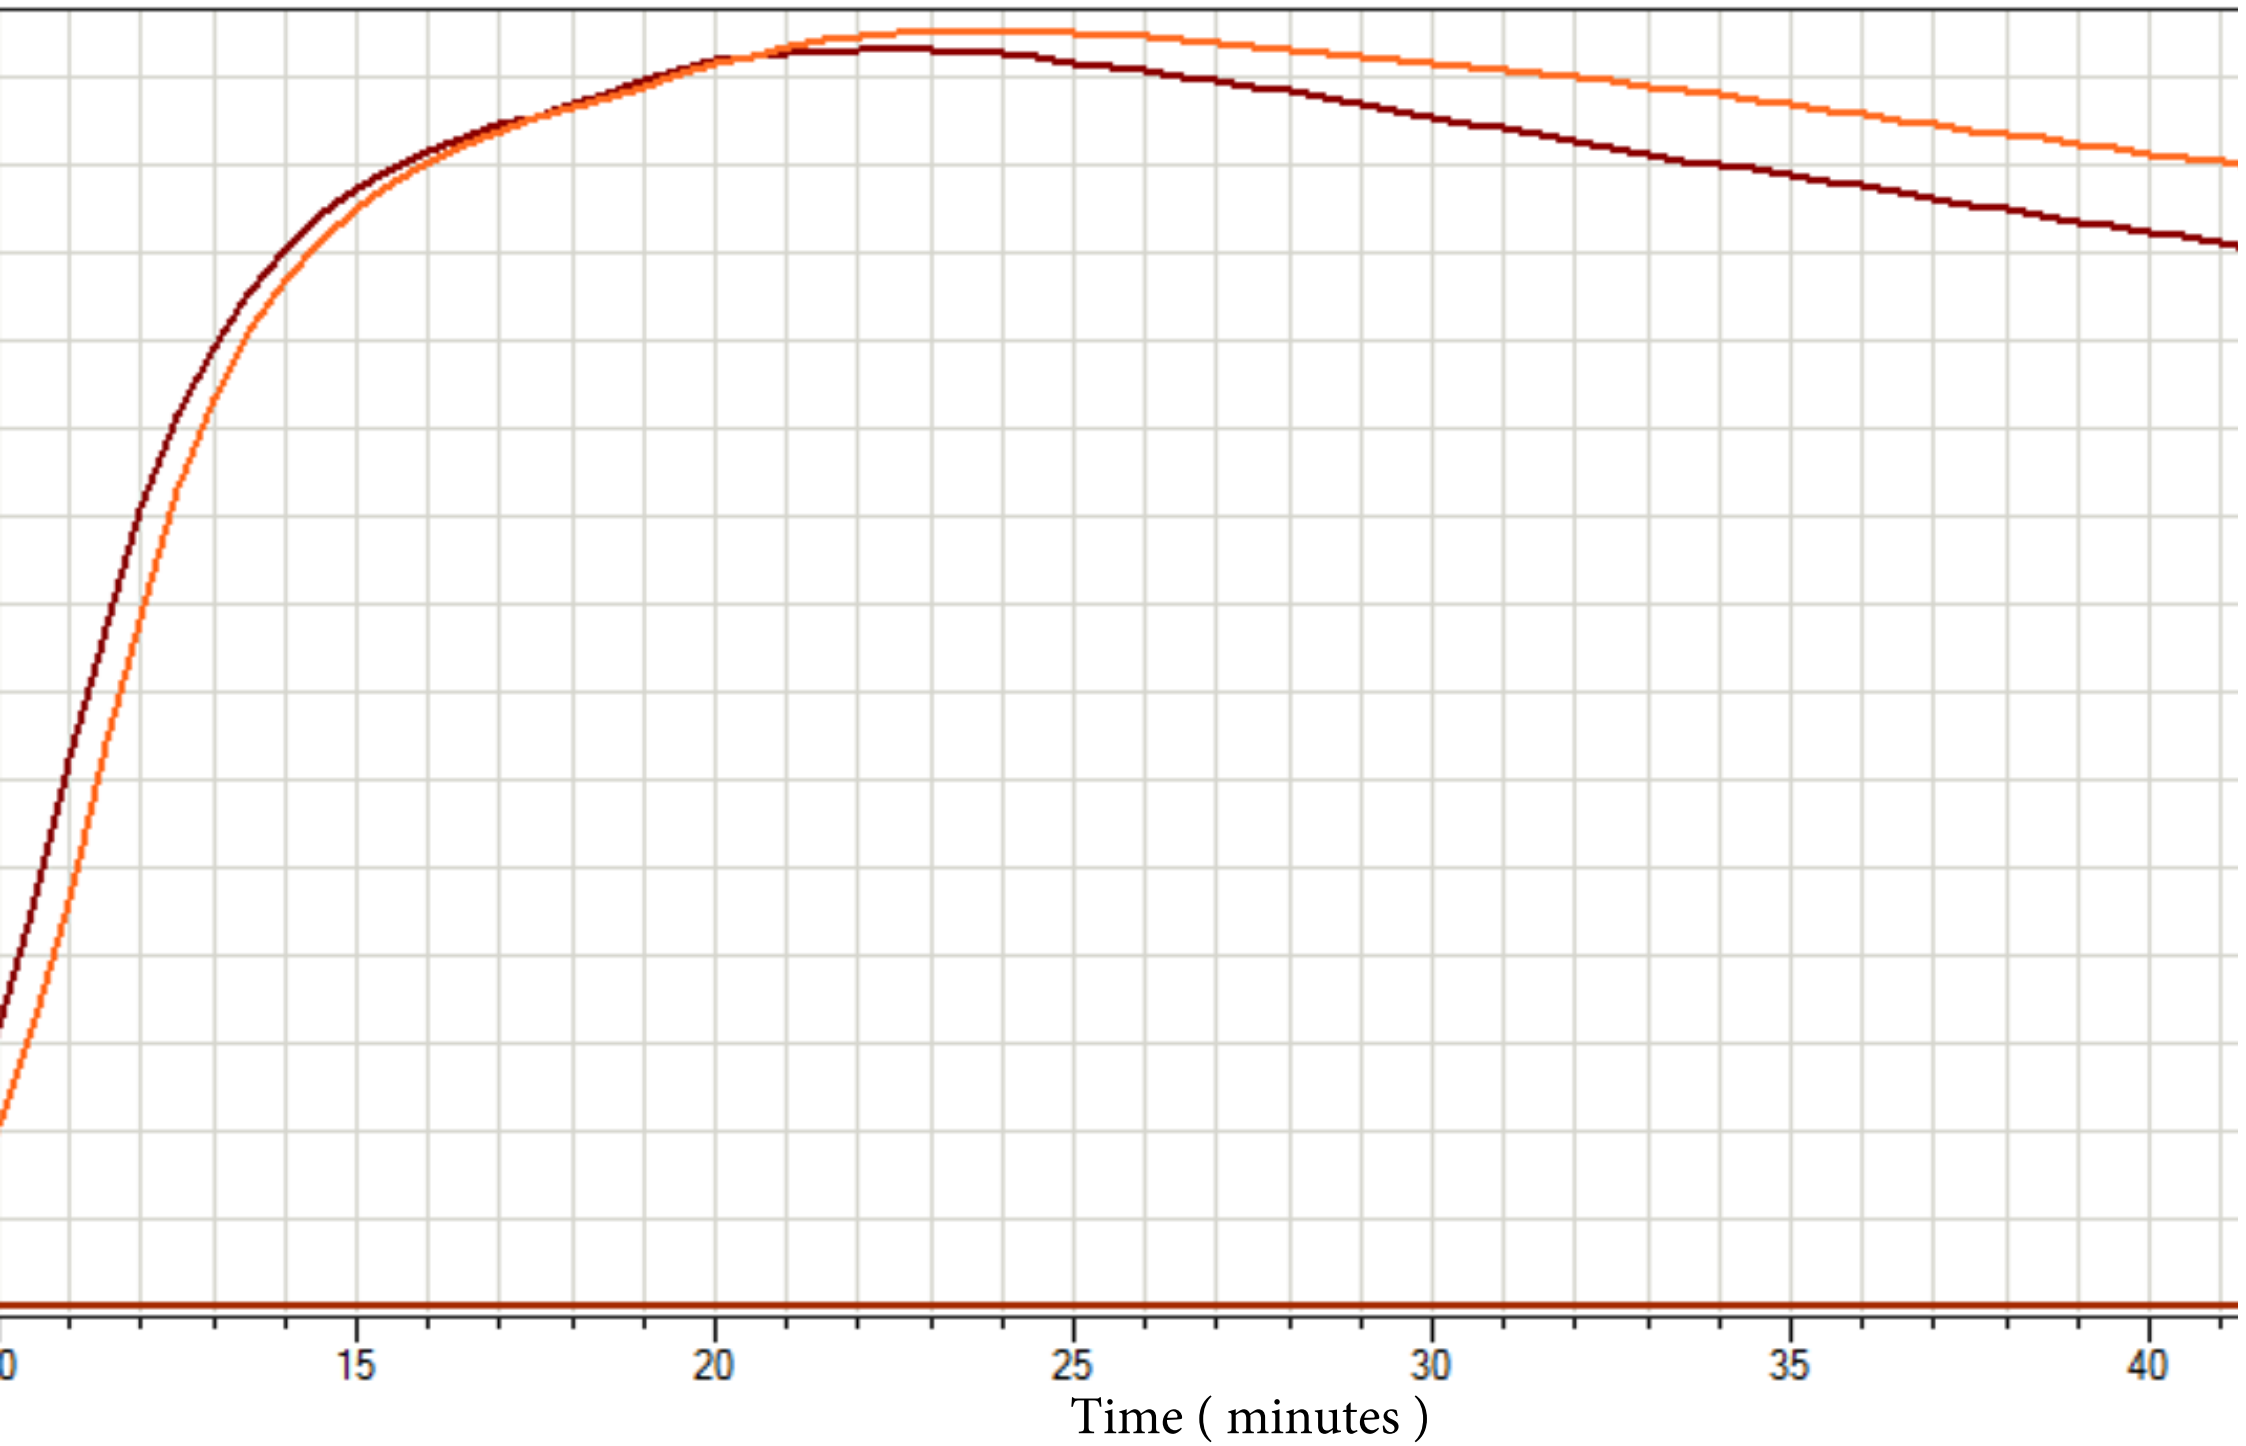

# Algorithm Processing Curve

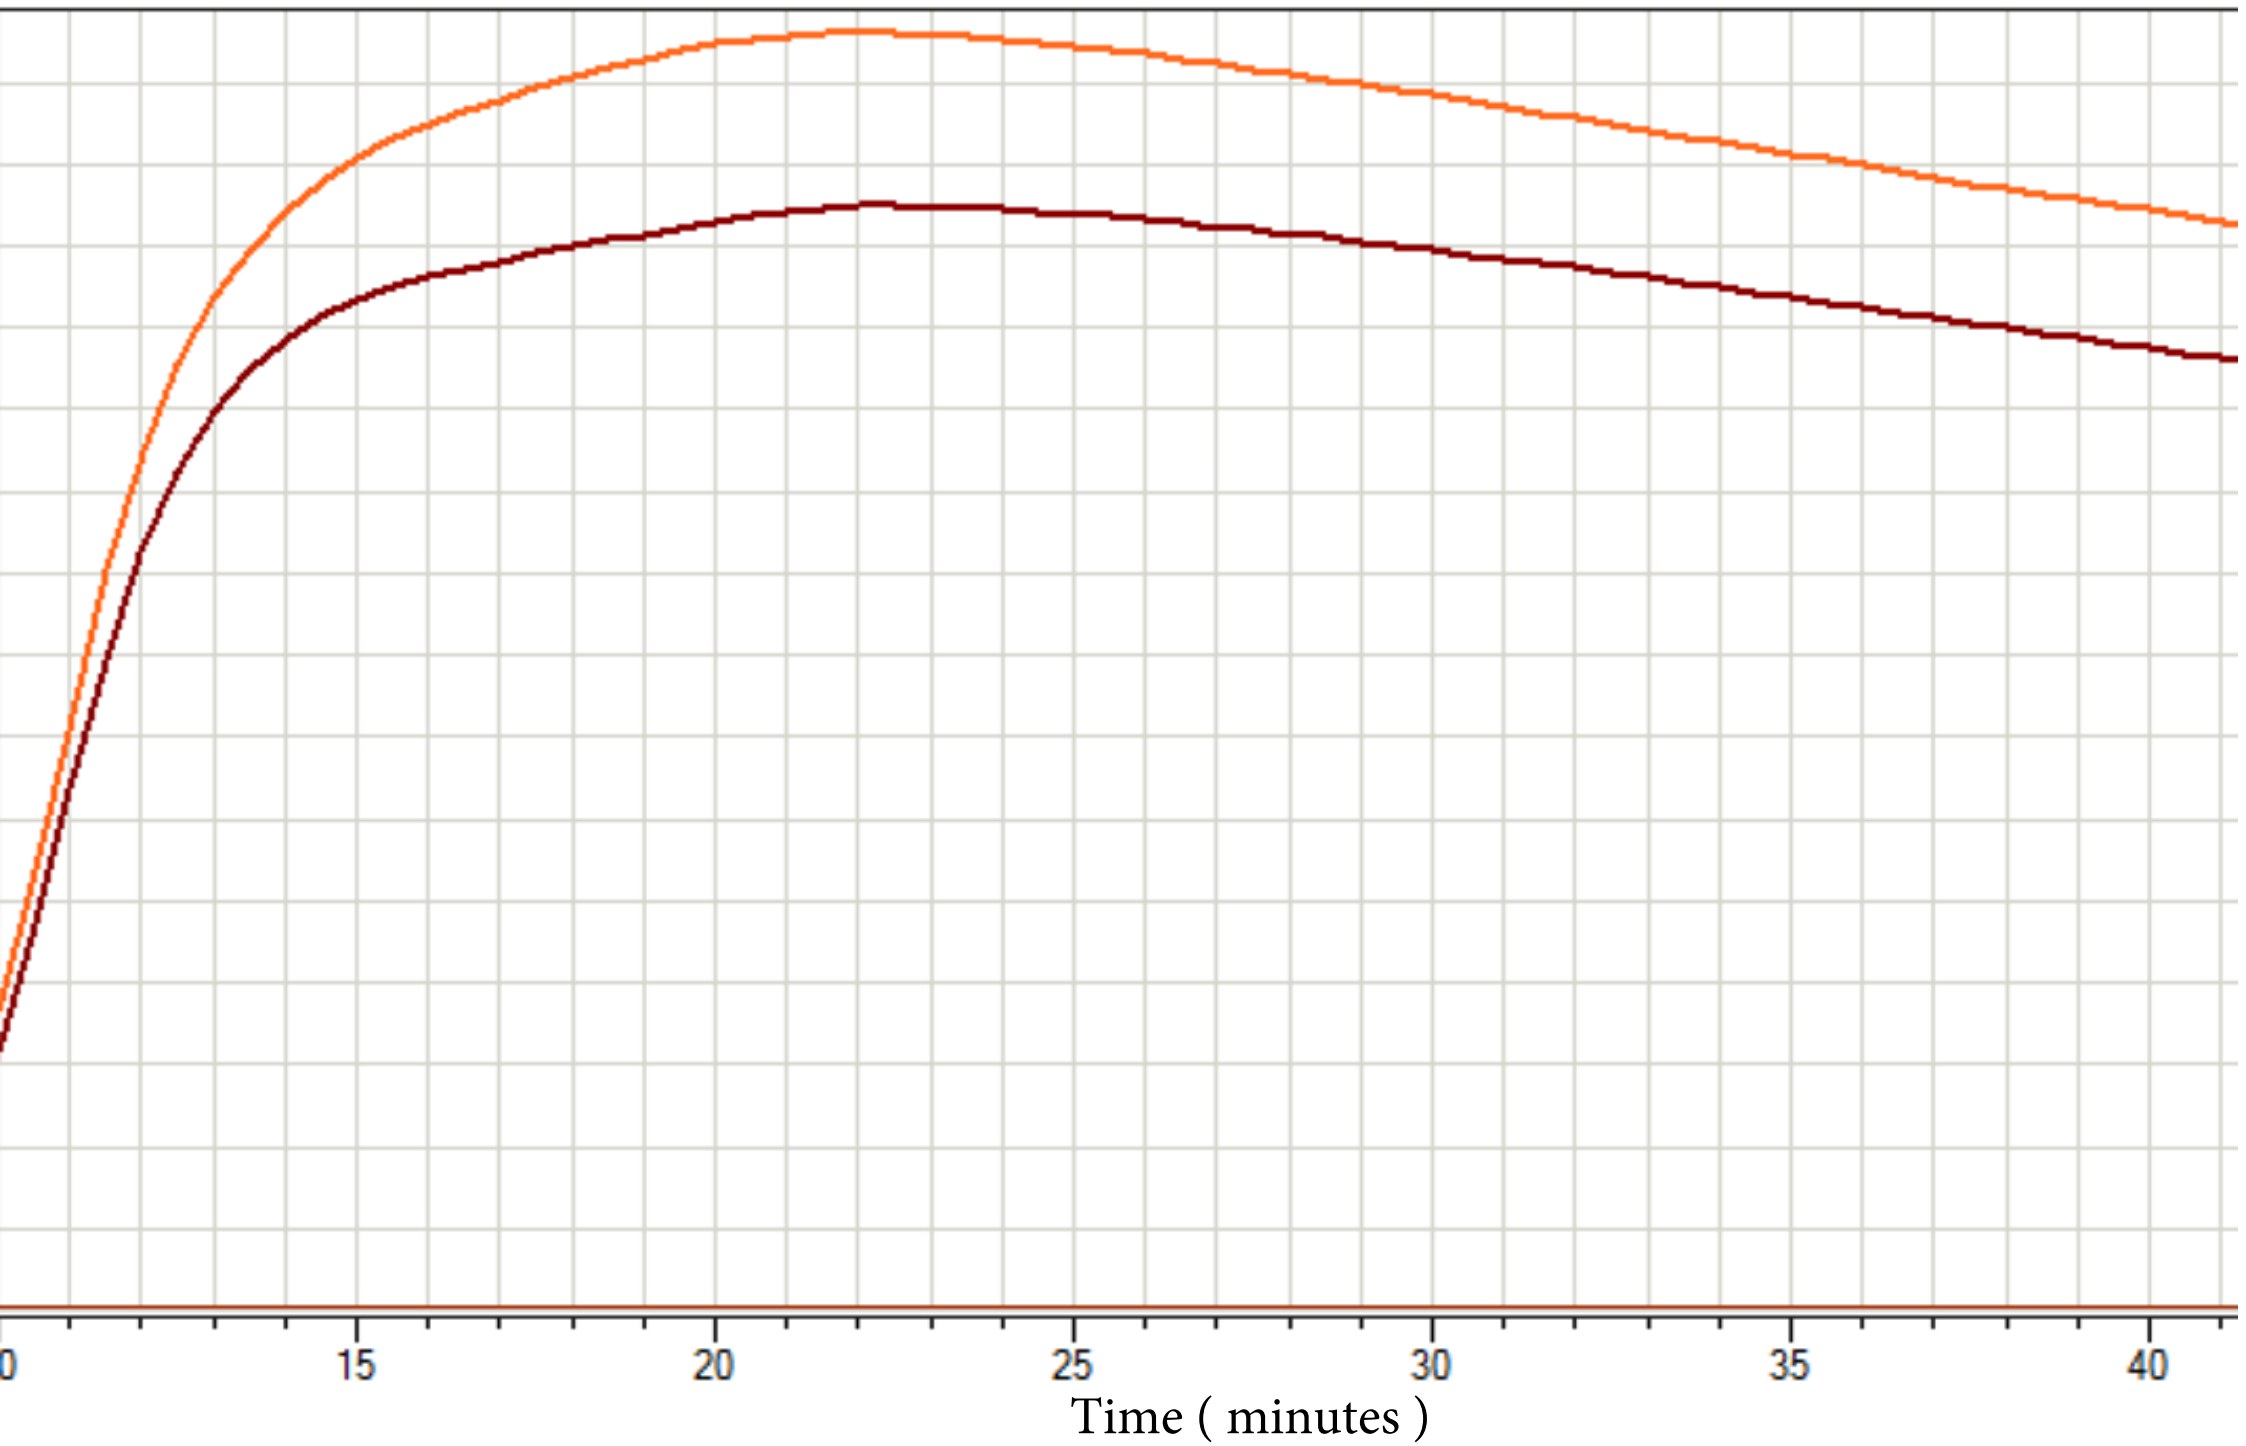

# Algorithm Processing Curve

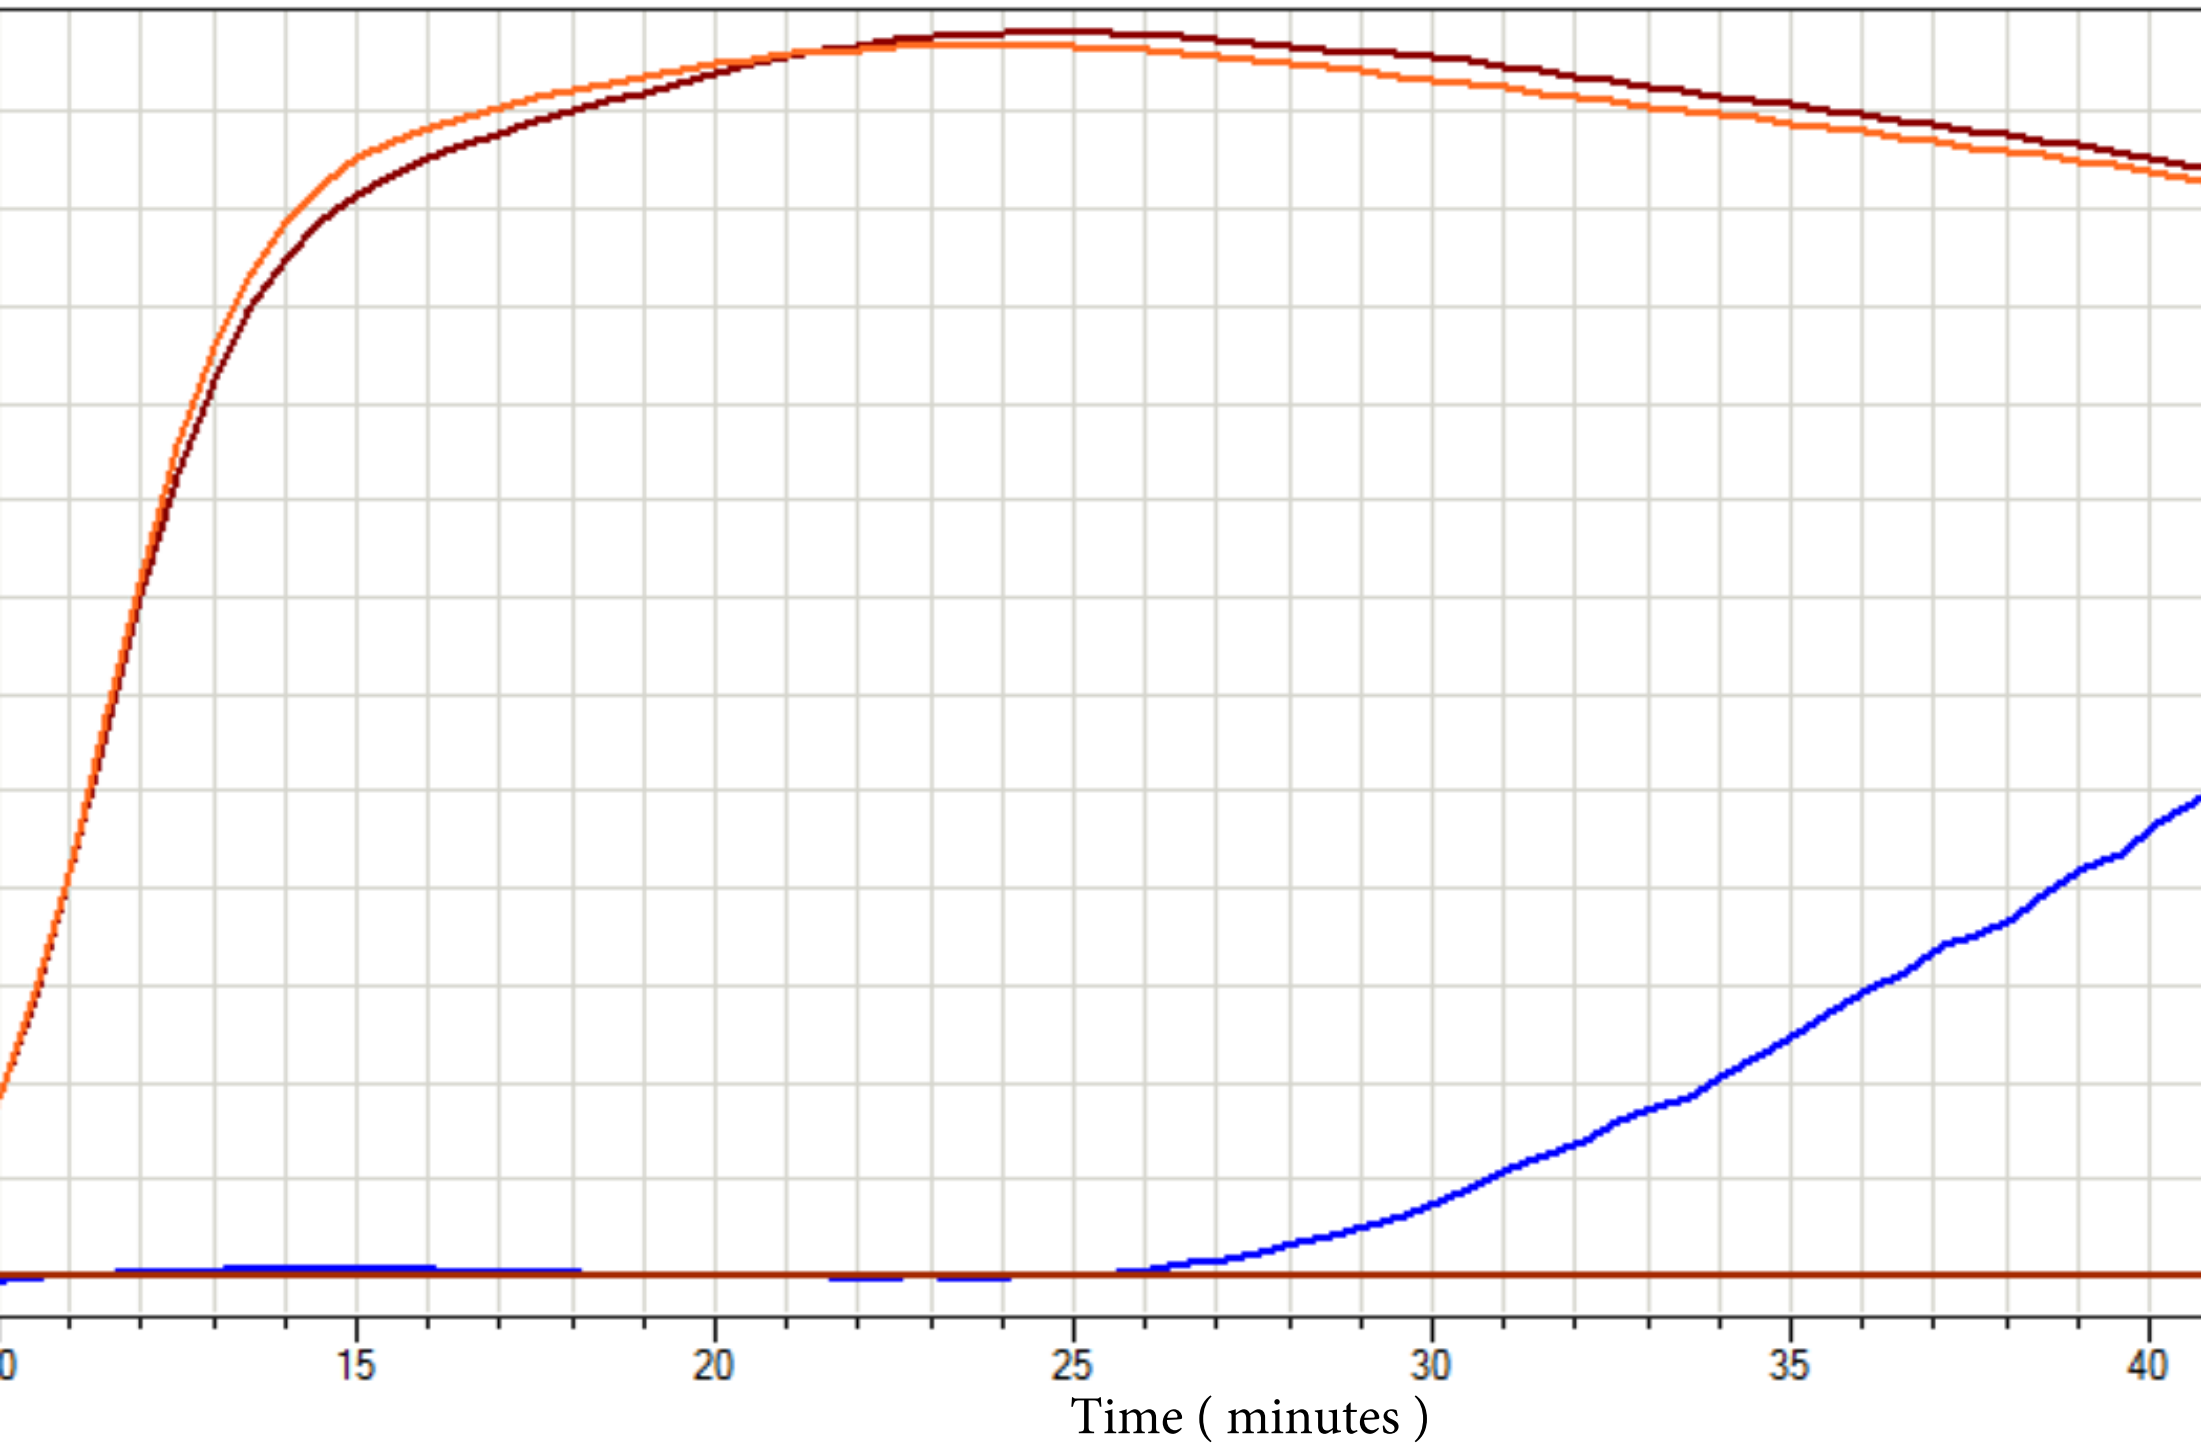

# Algorithm Processing Curve

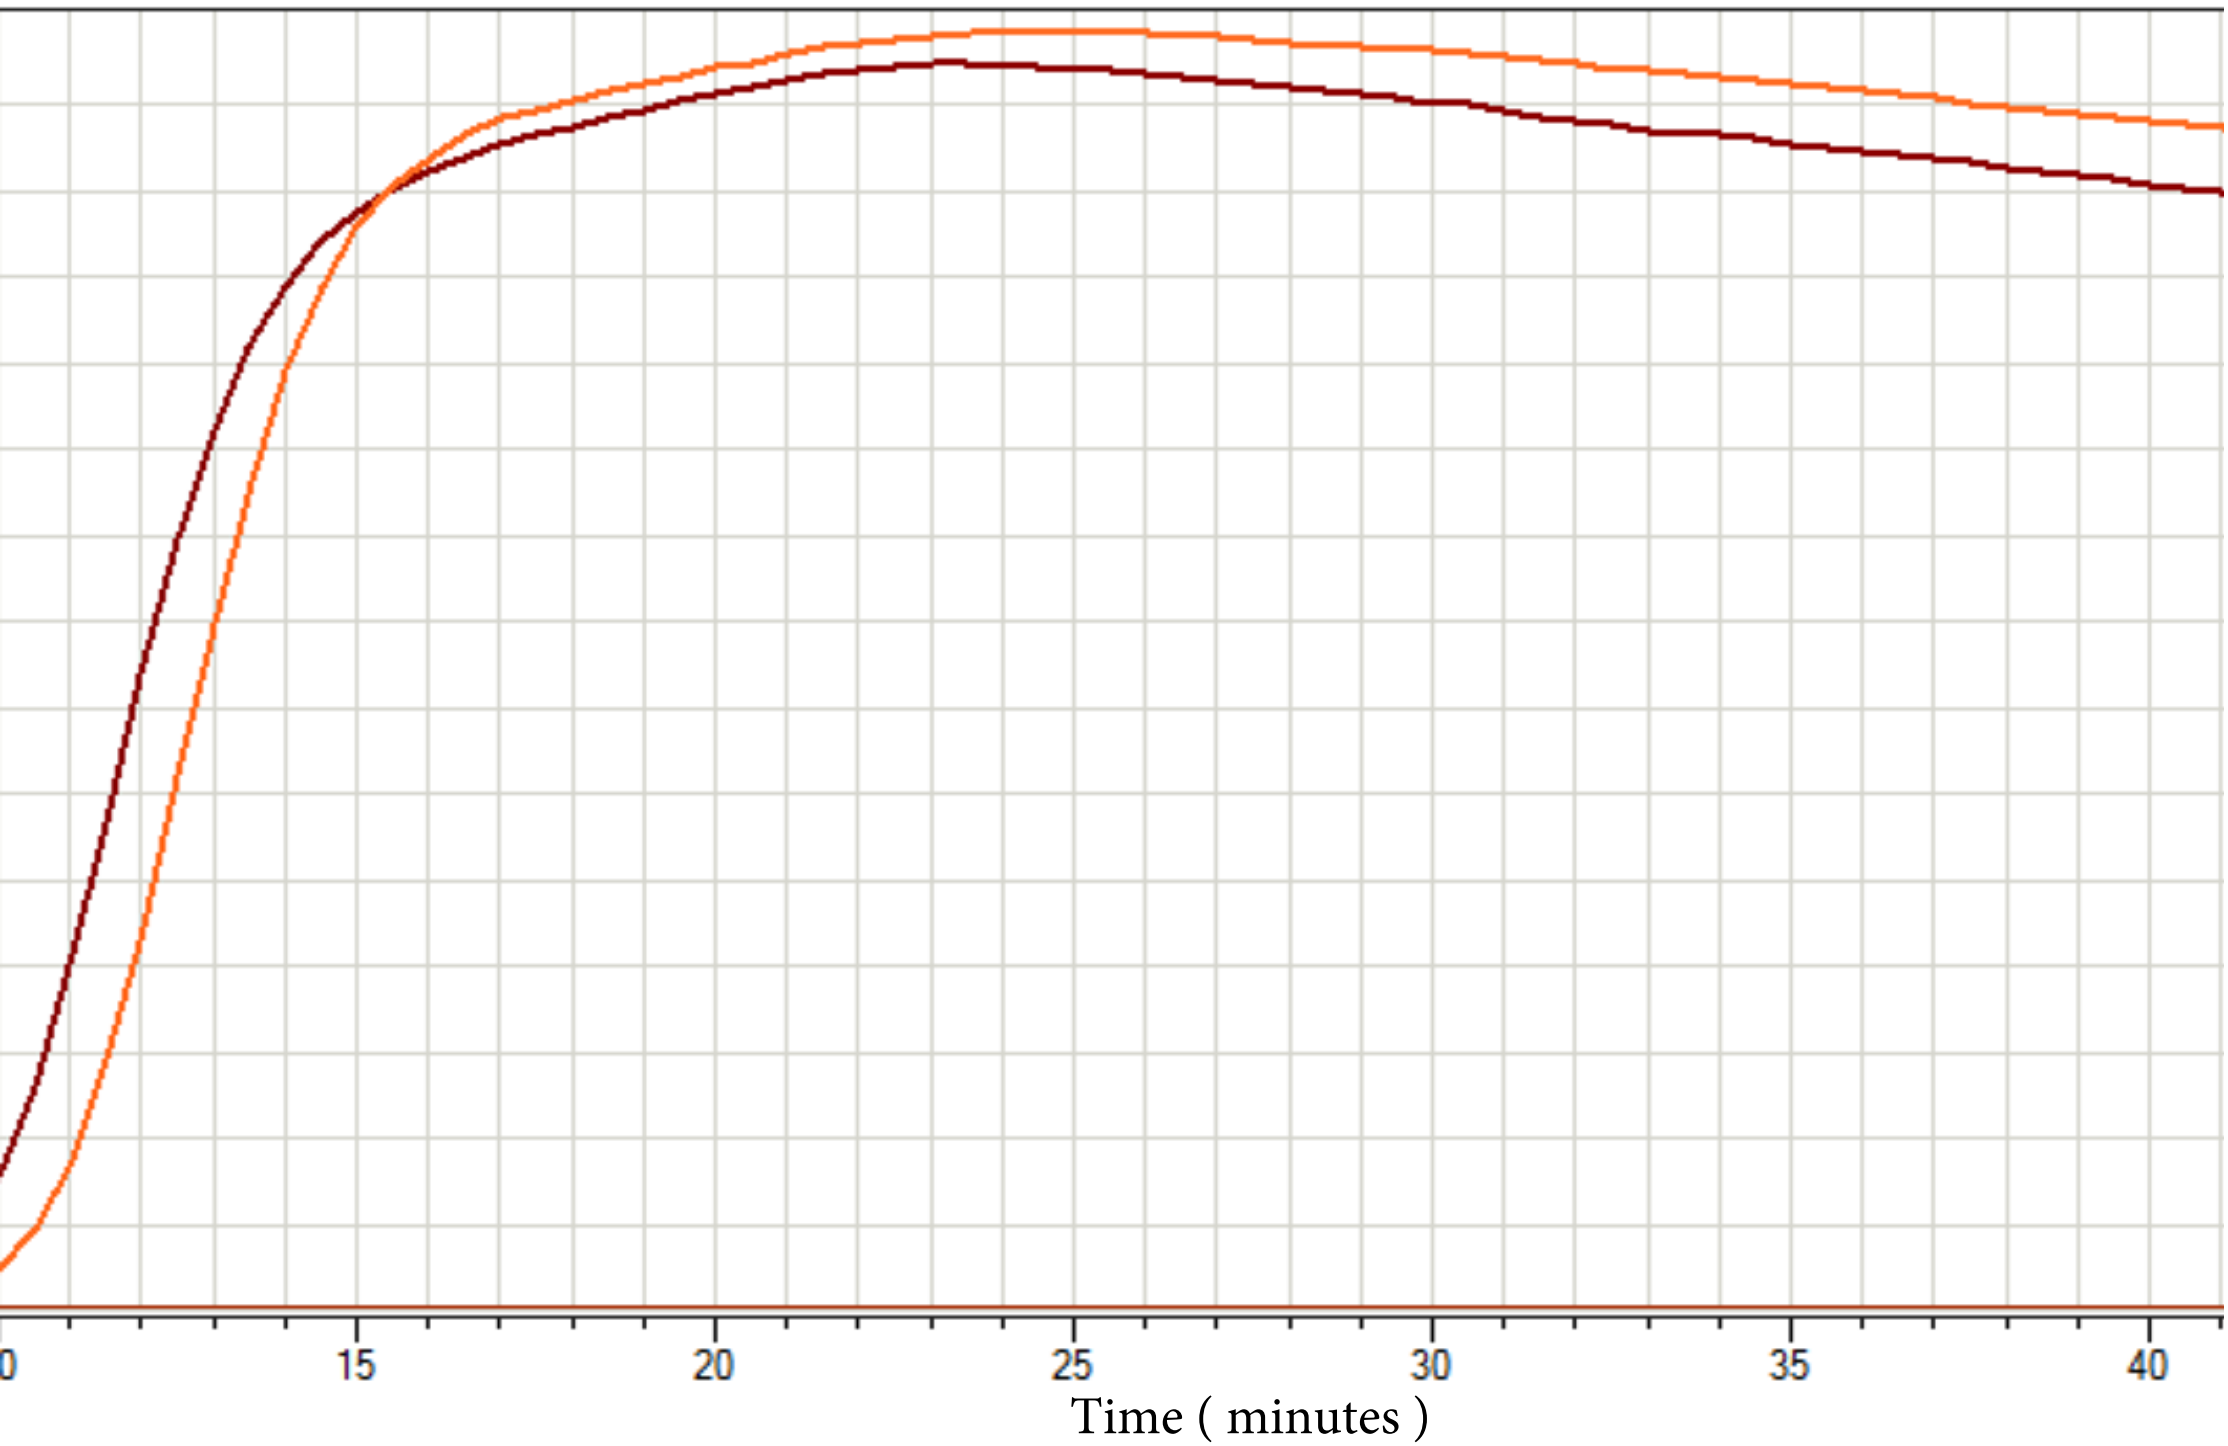



# Algorithm Processing Curve

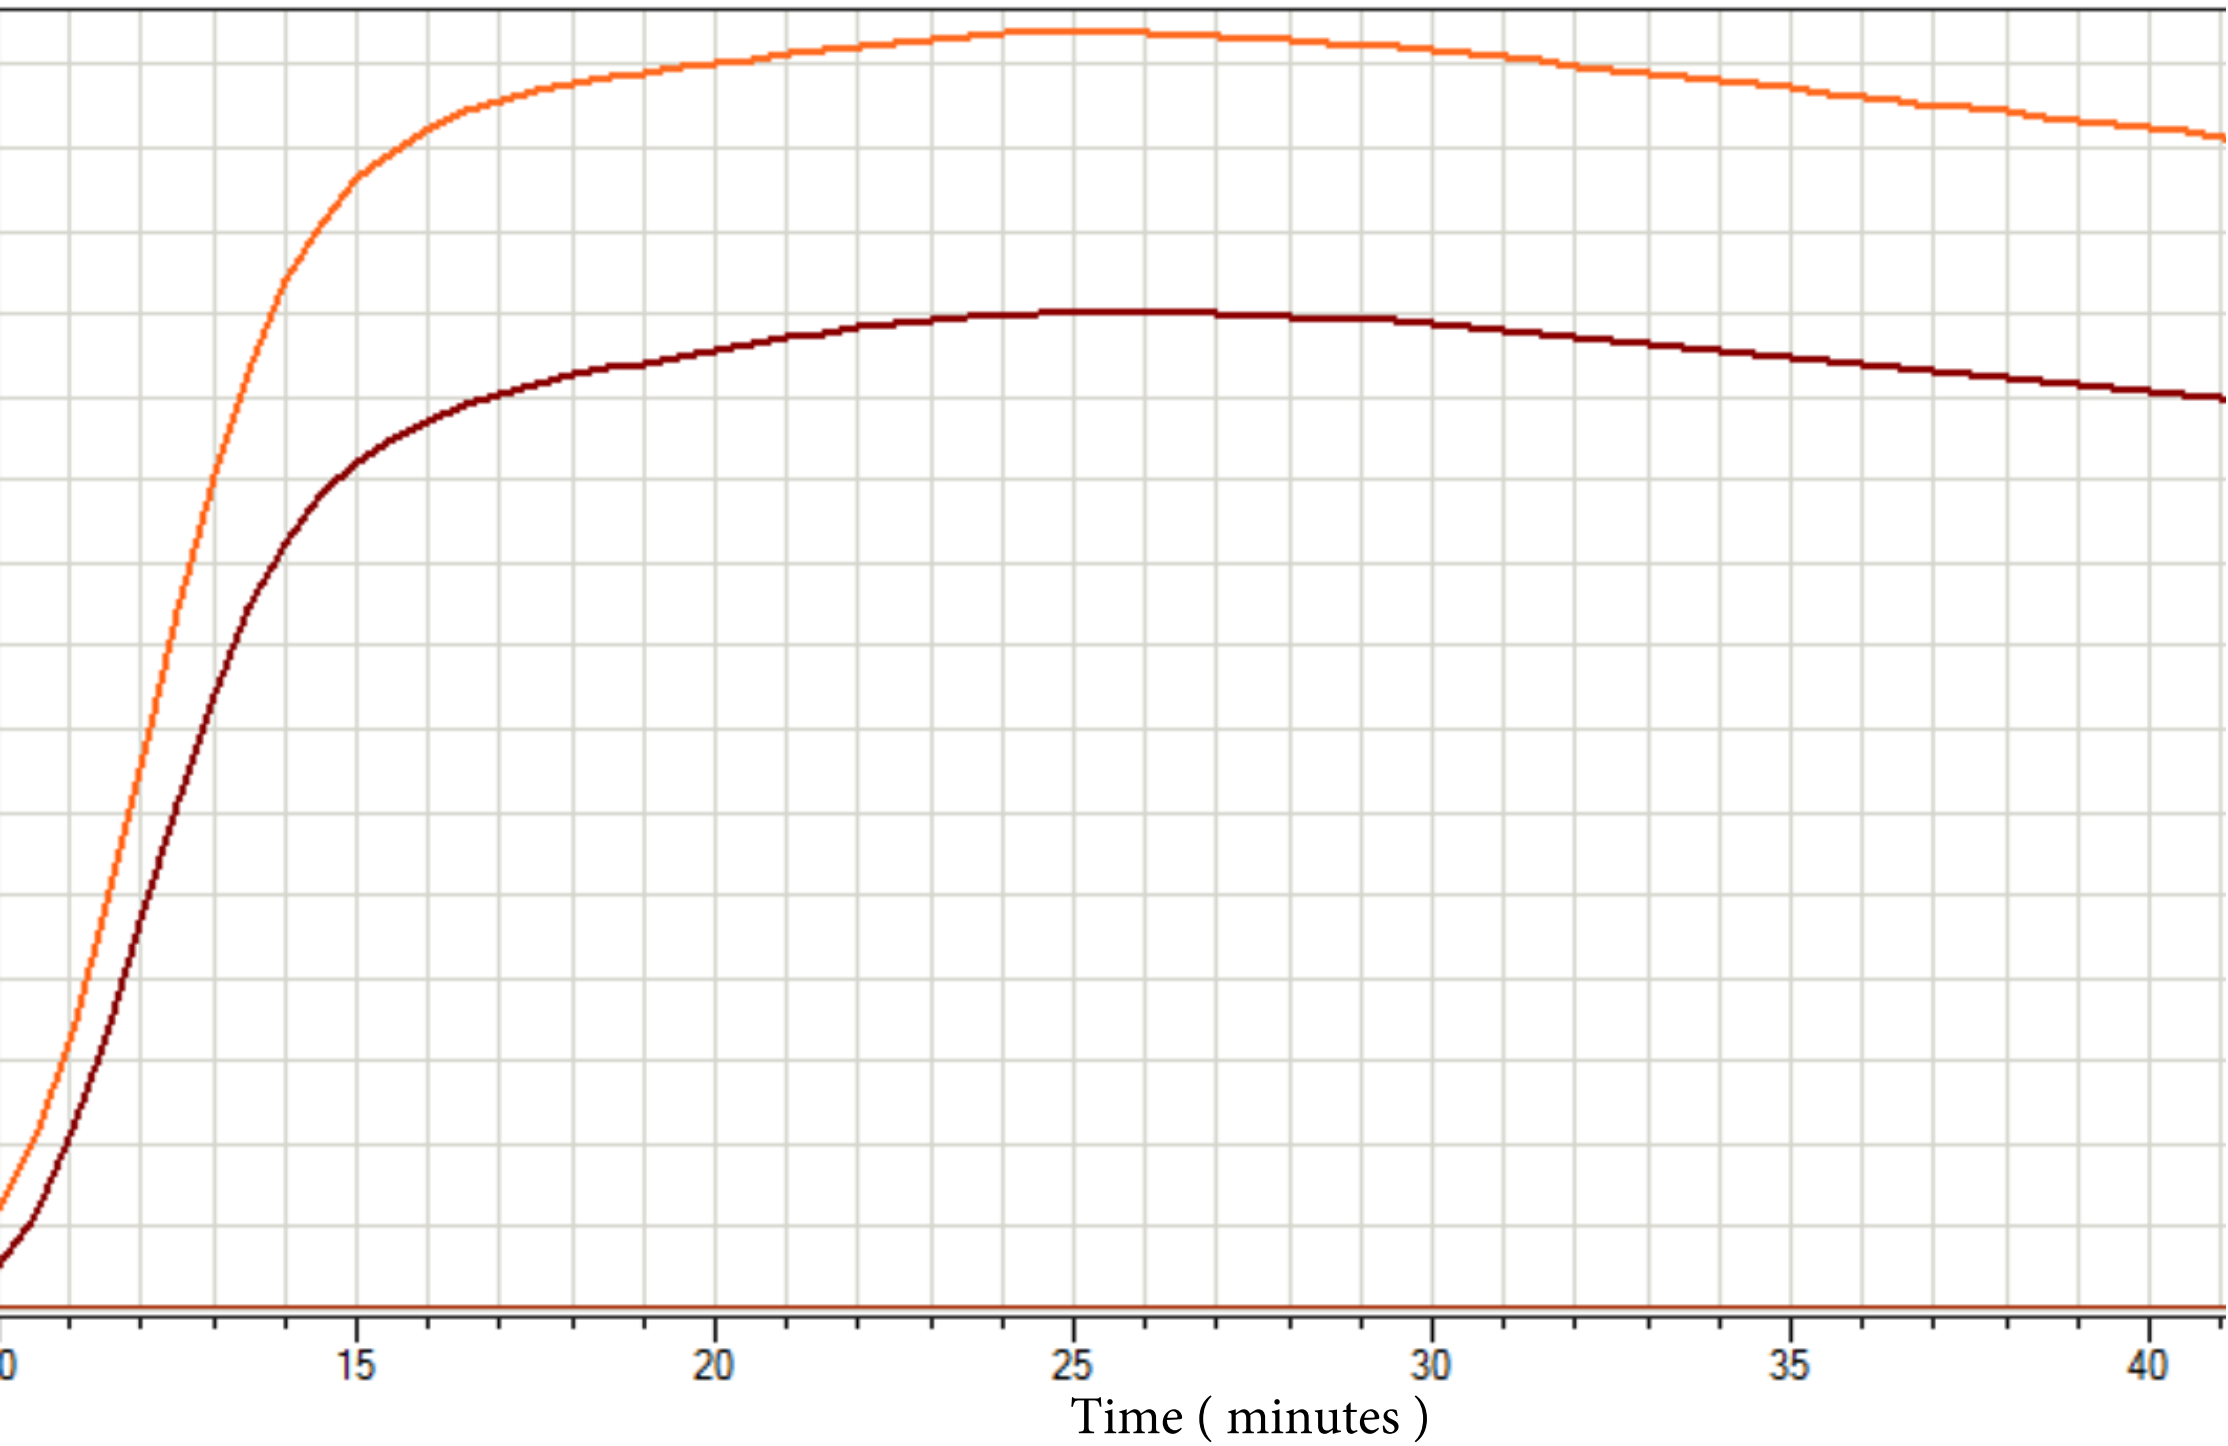

# Algorithm Processing Curve

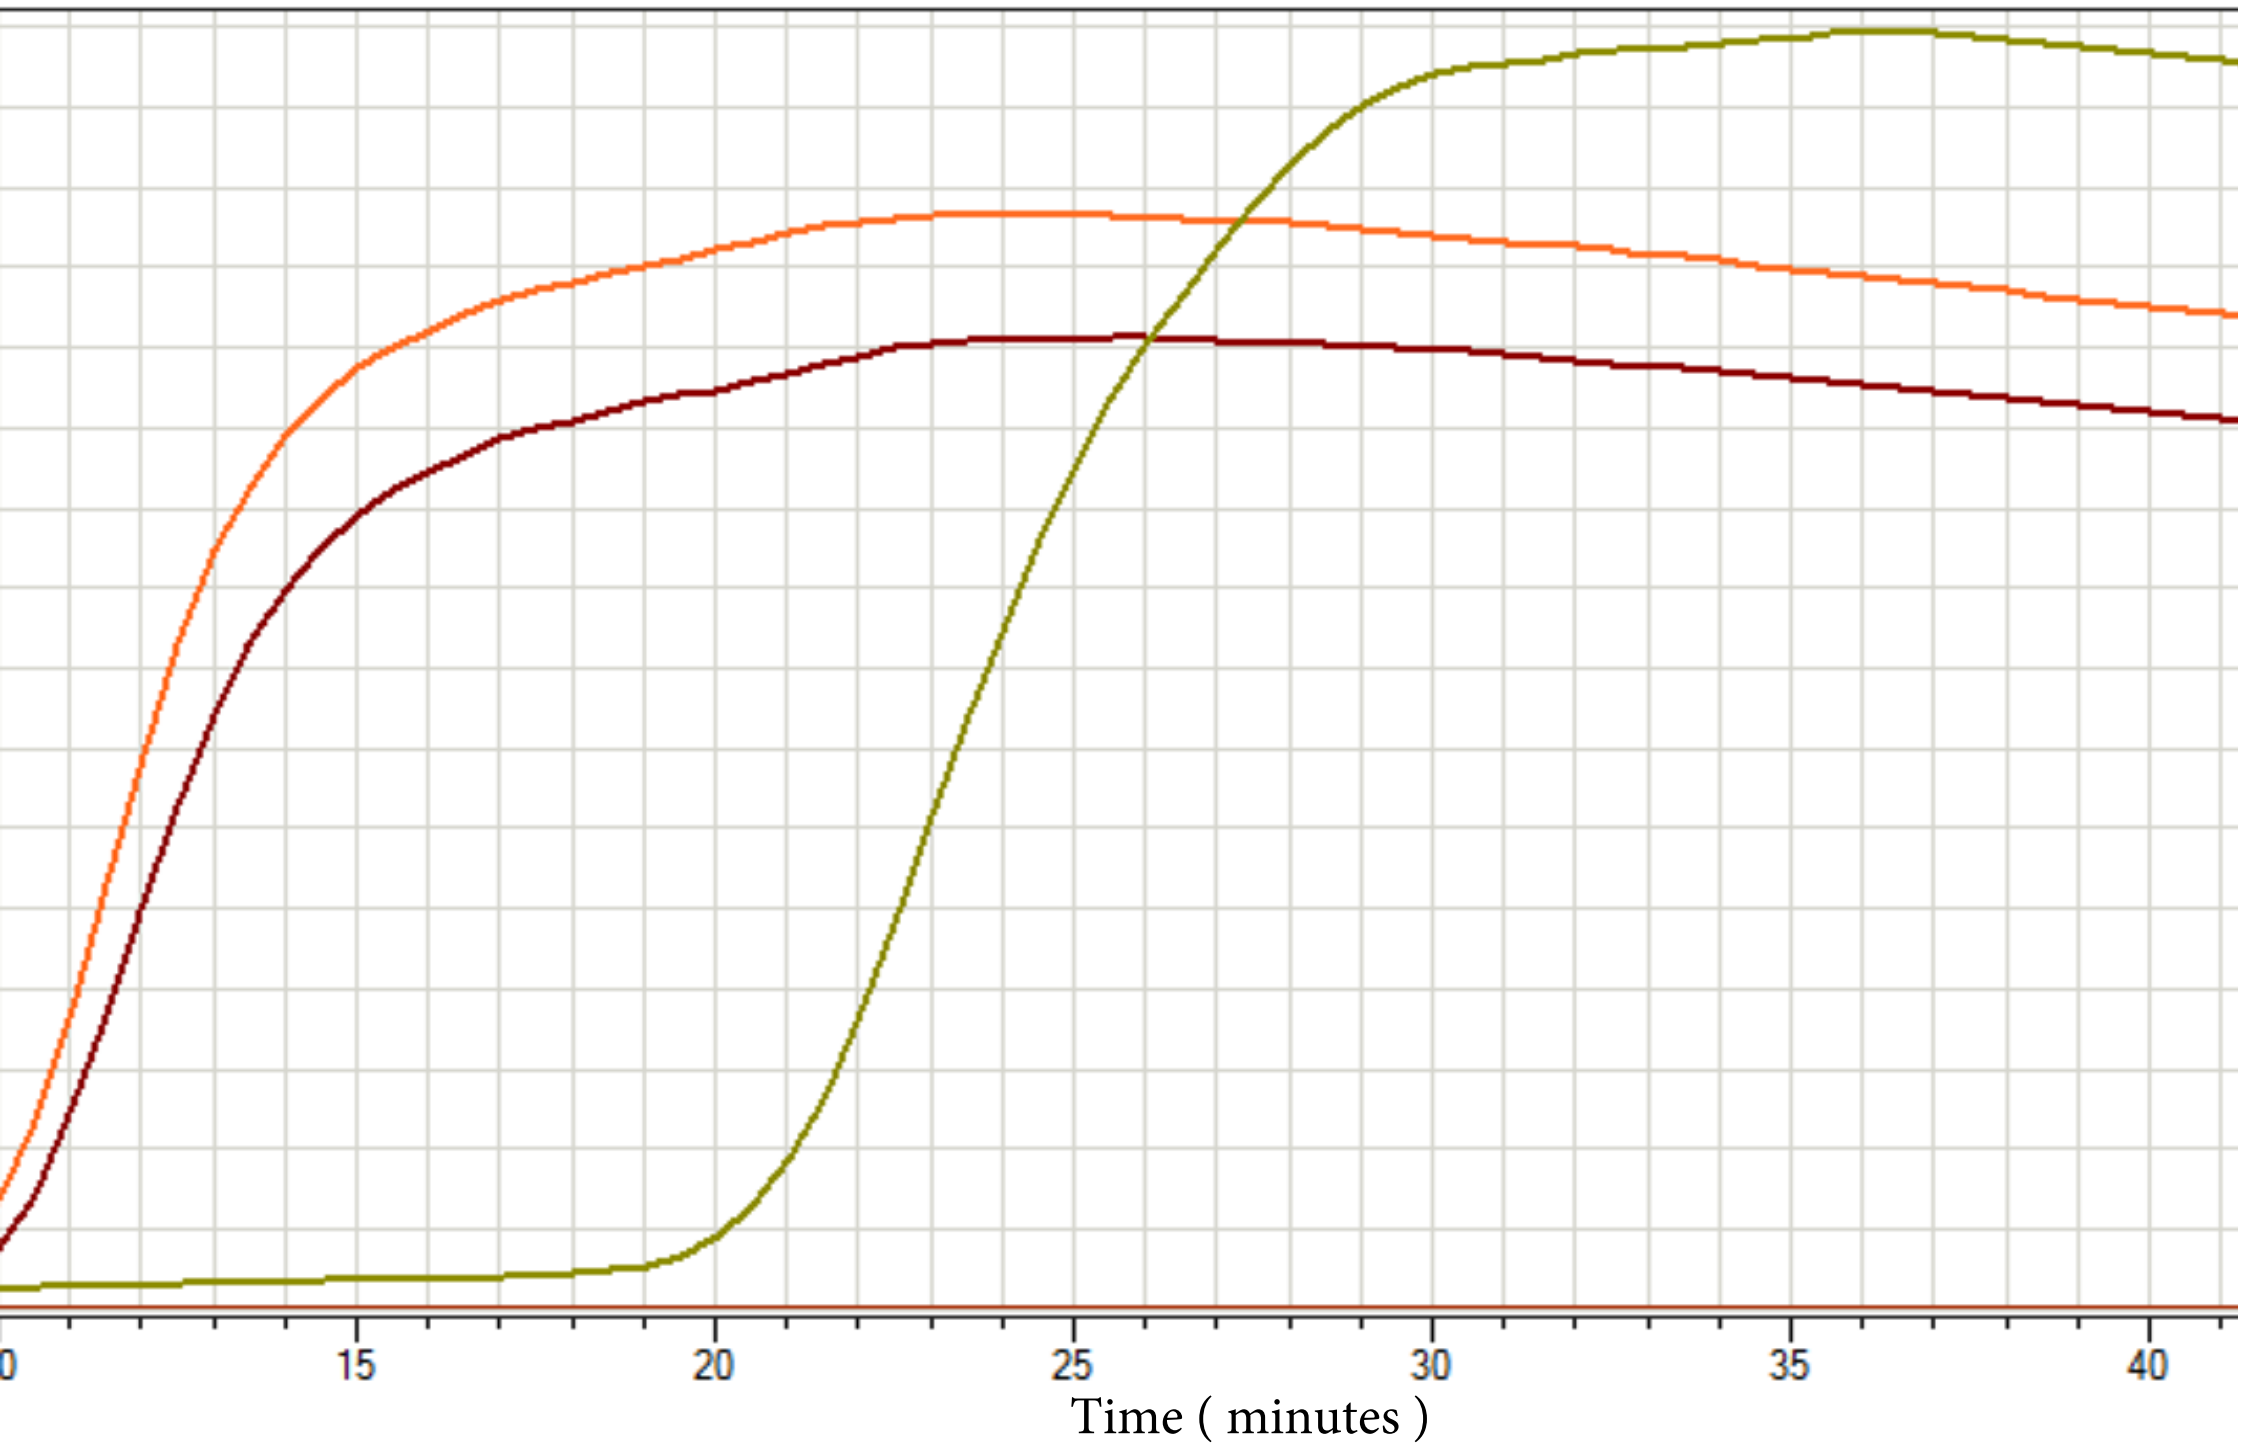

# Algorithm Processing Curve

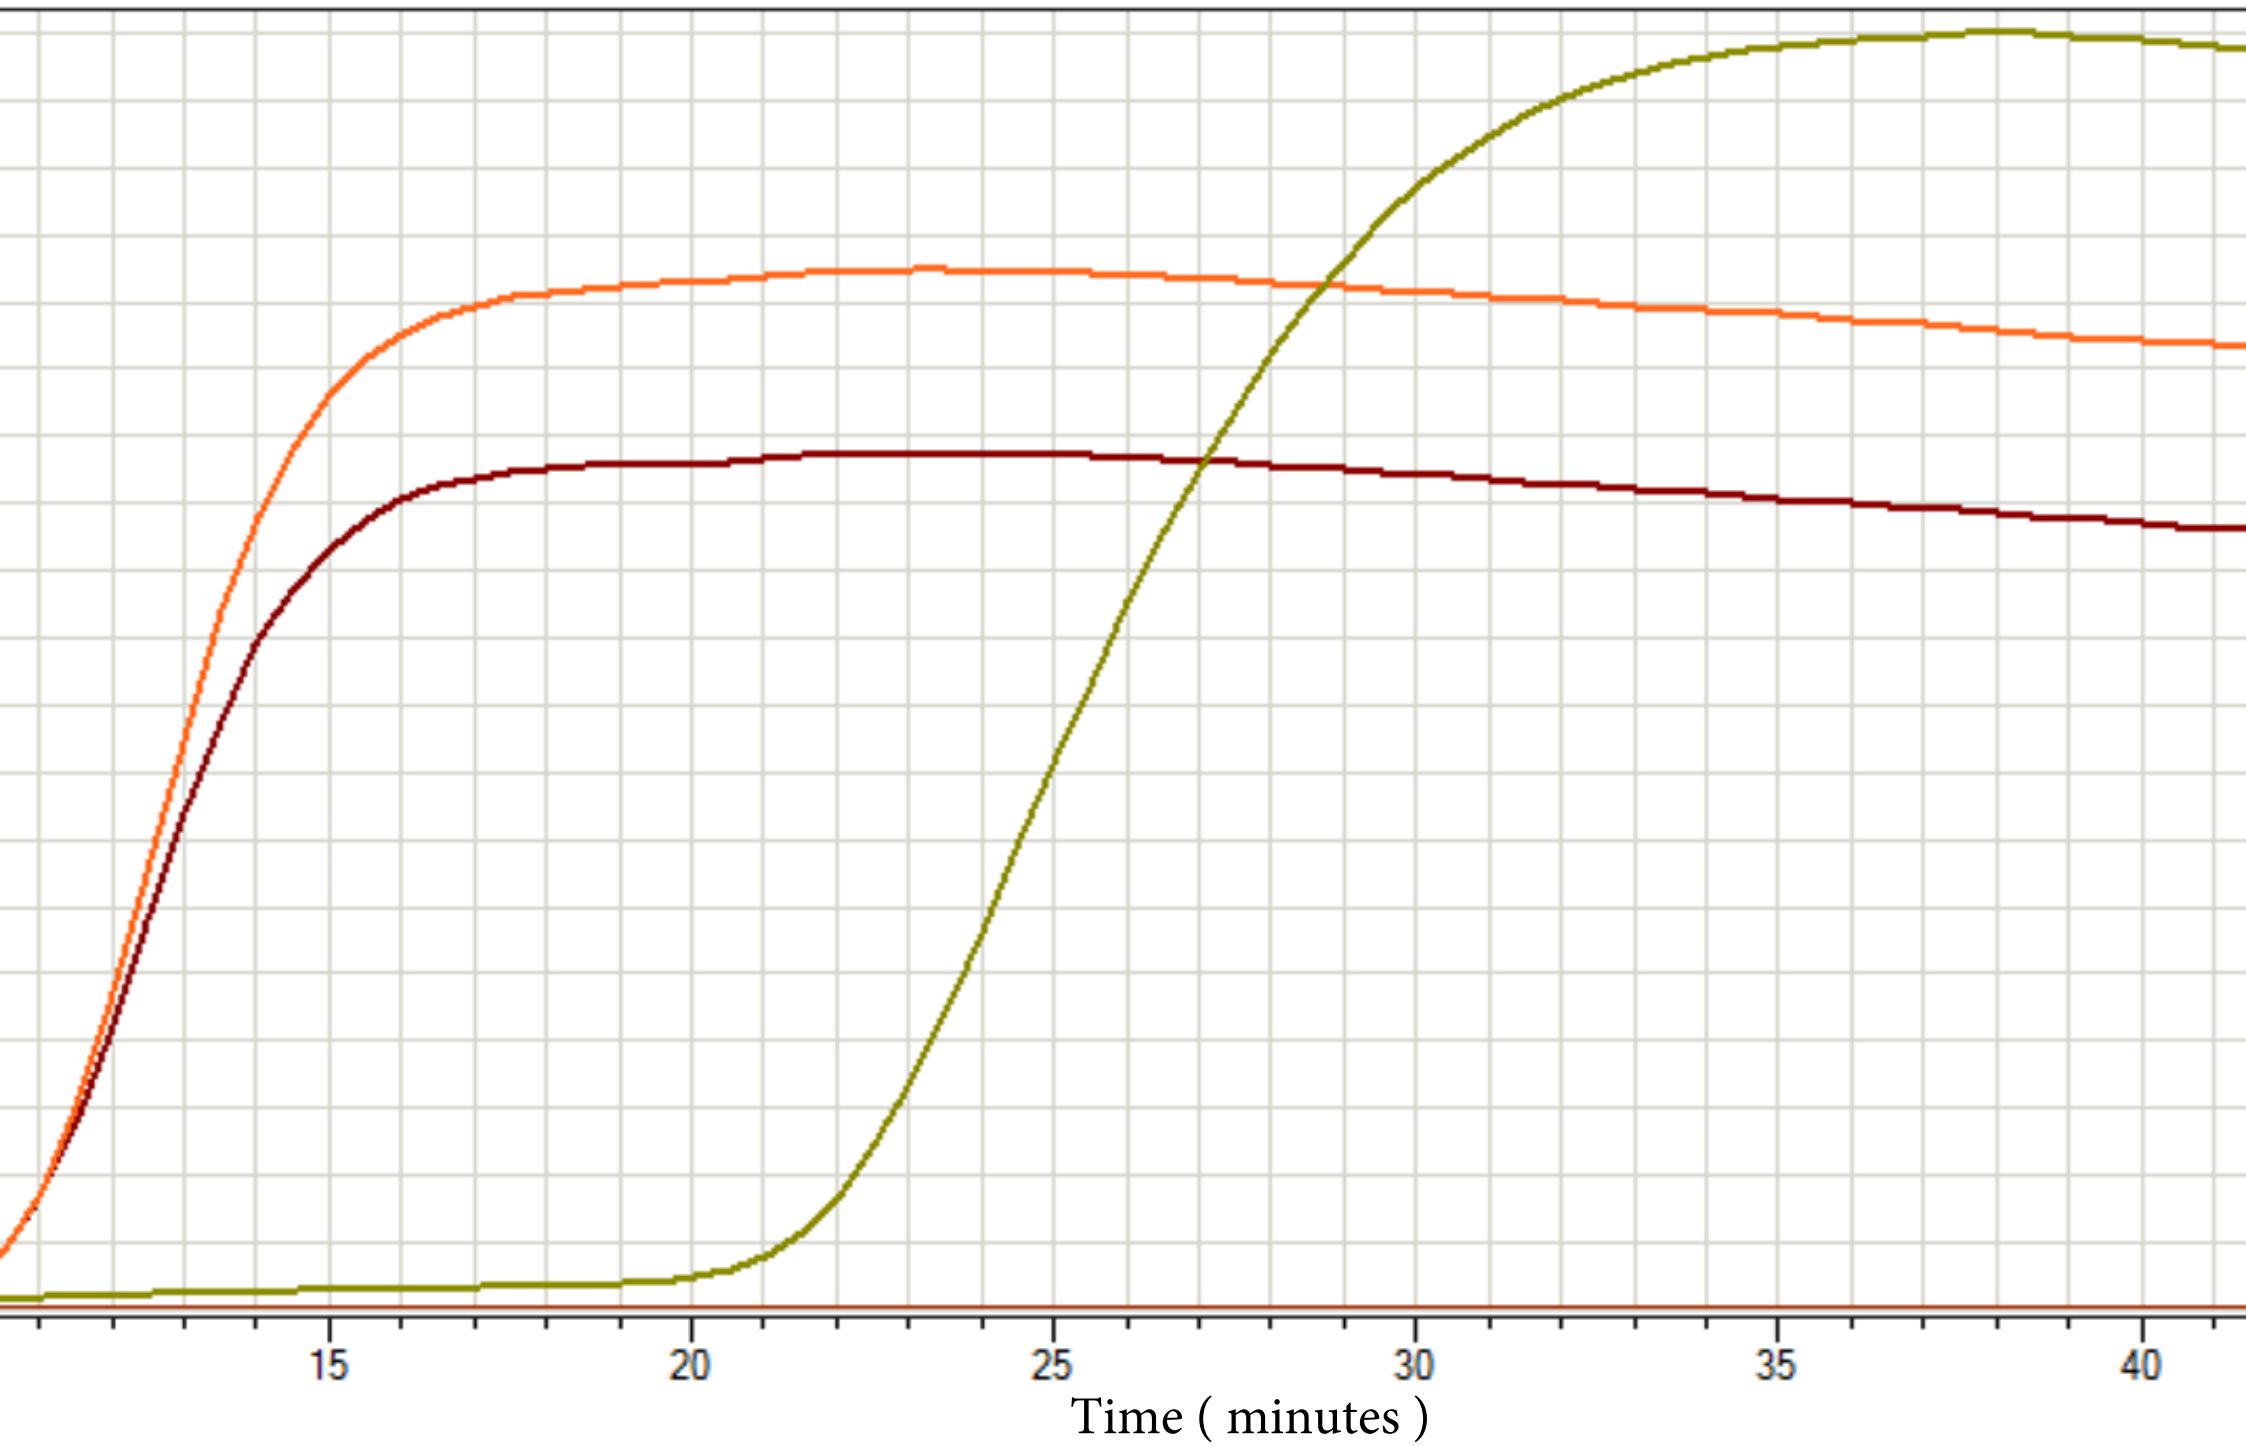

# Algorithm Processing Curve

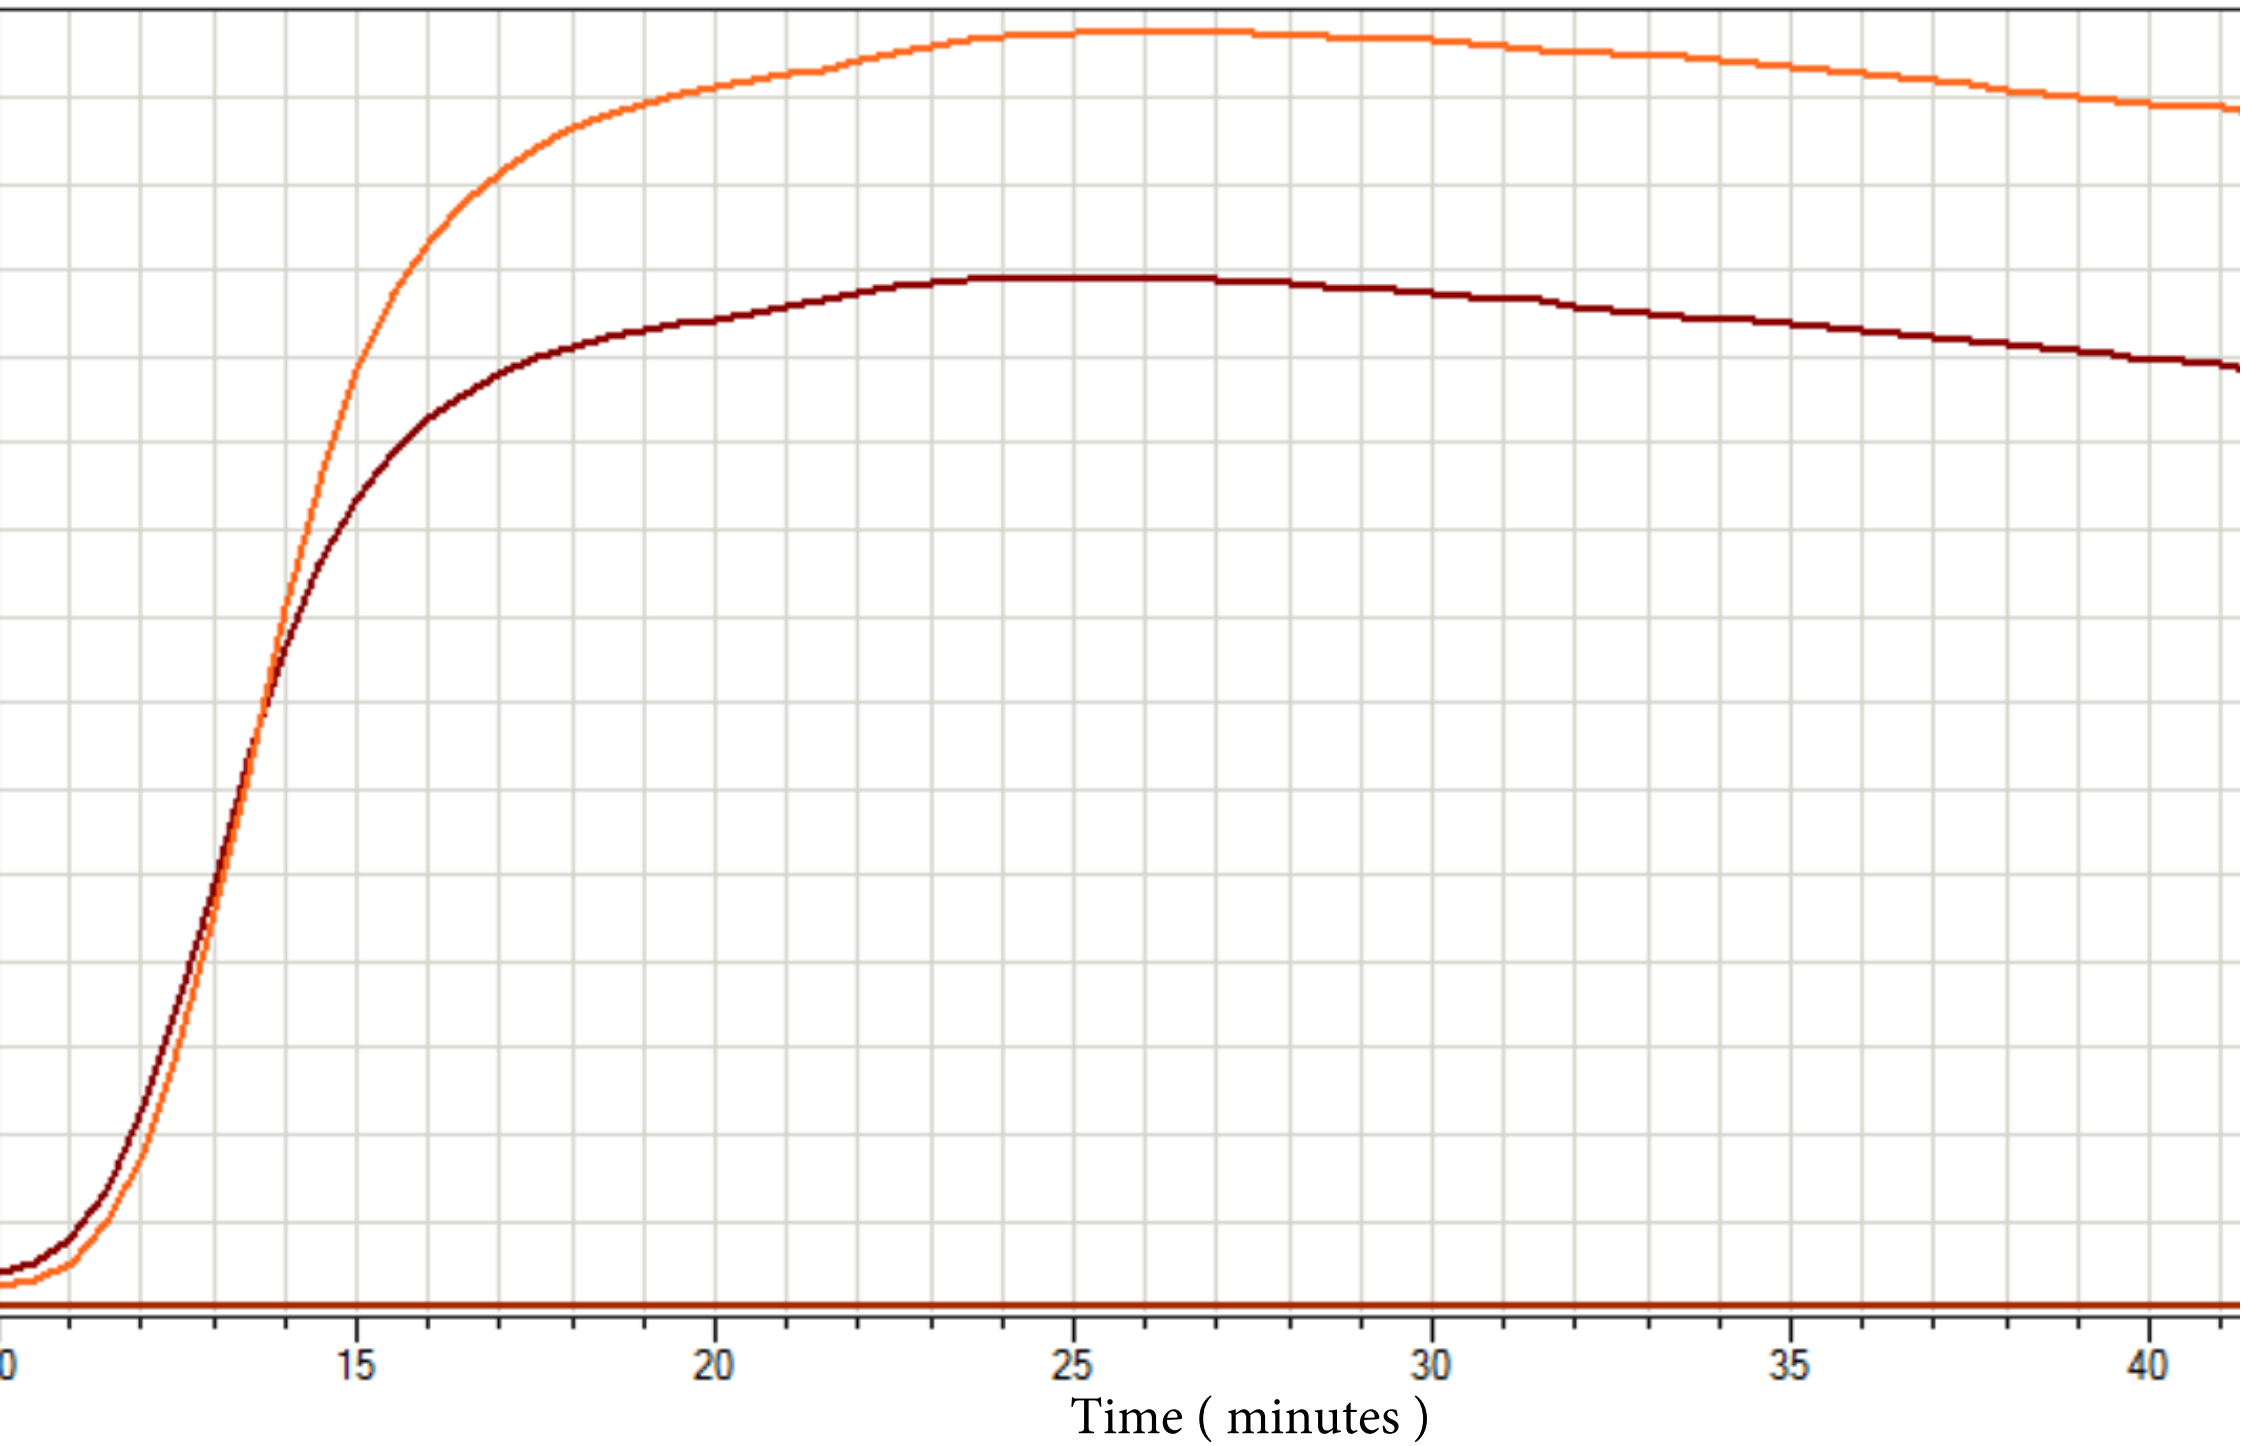

# Algorithm Processing Curve

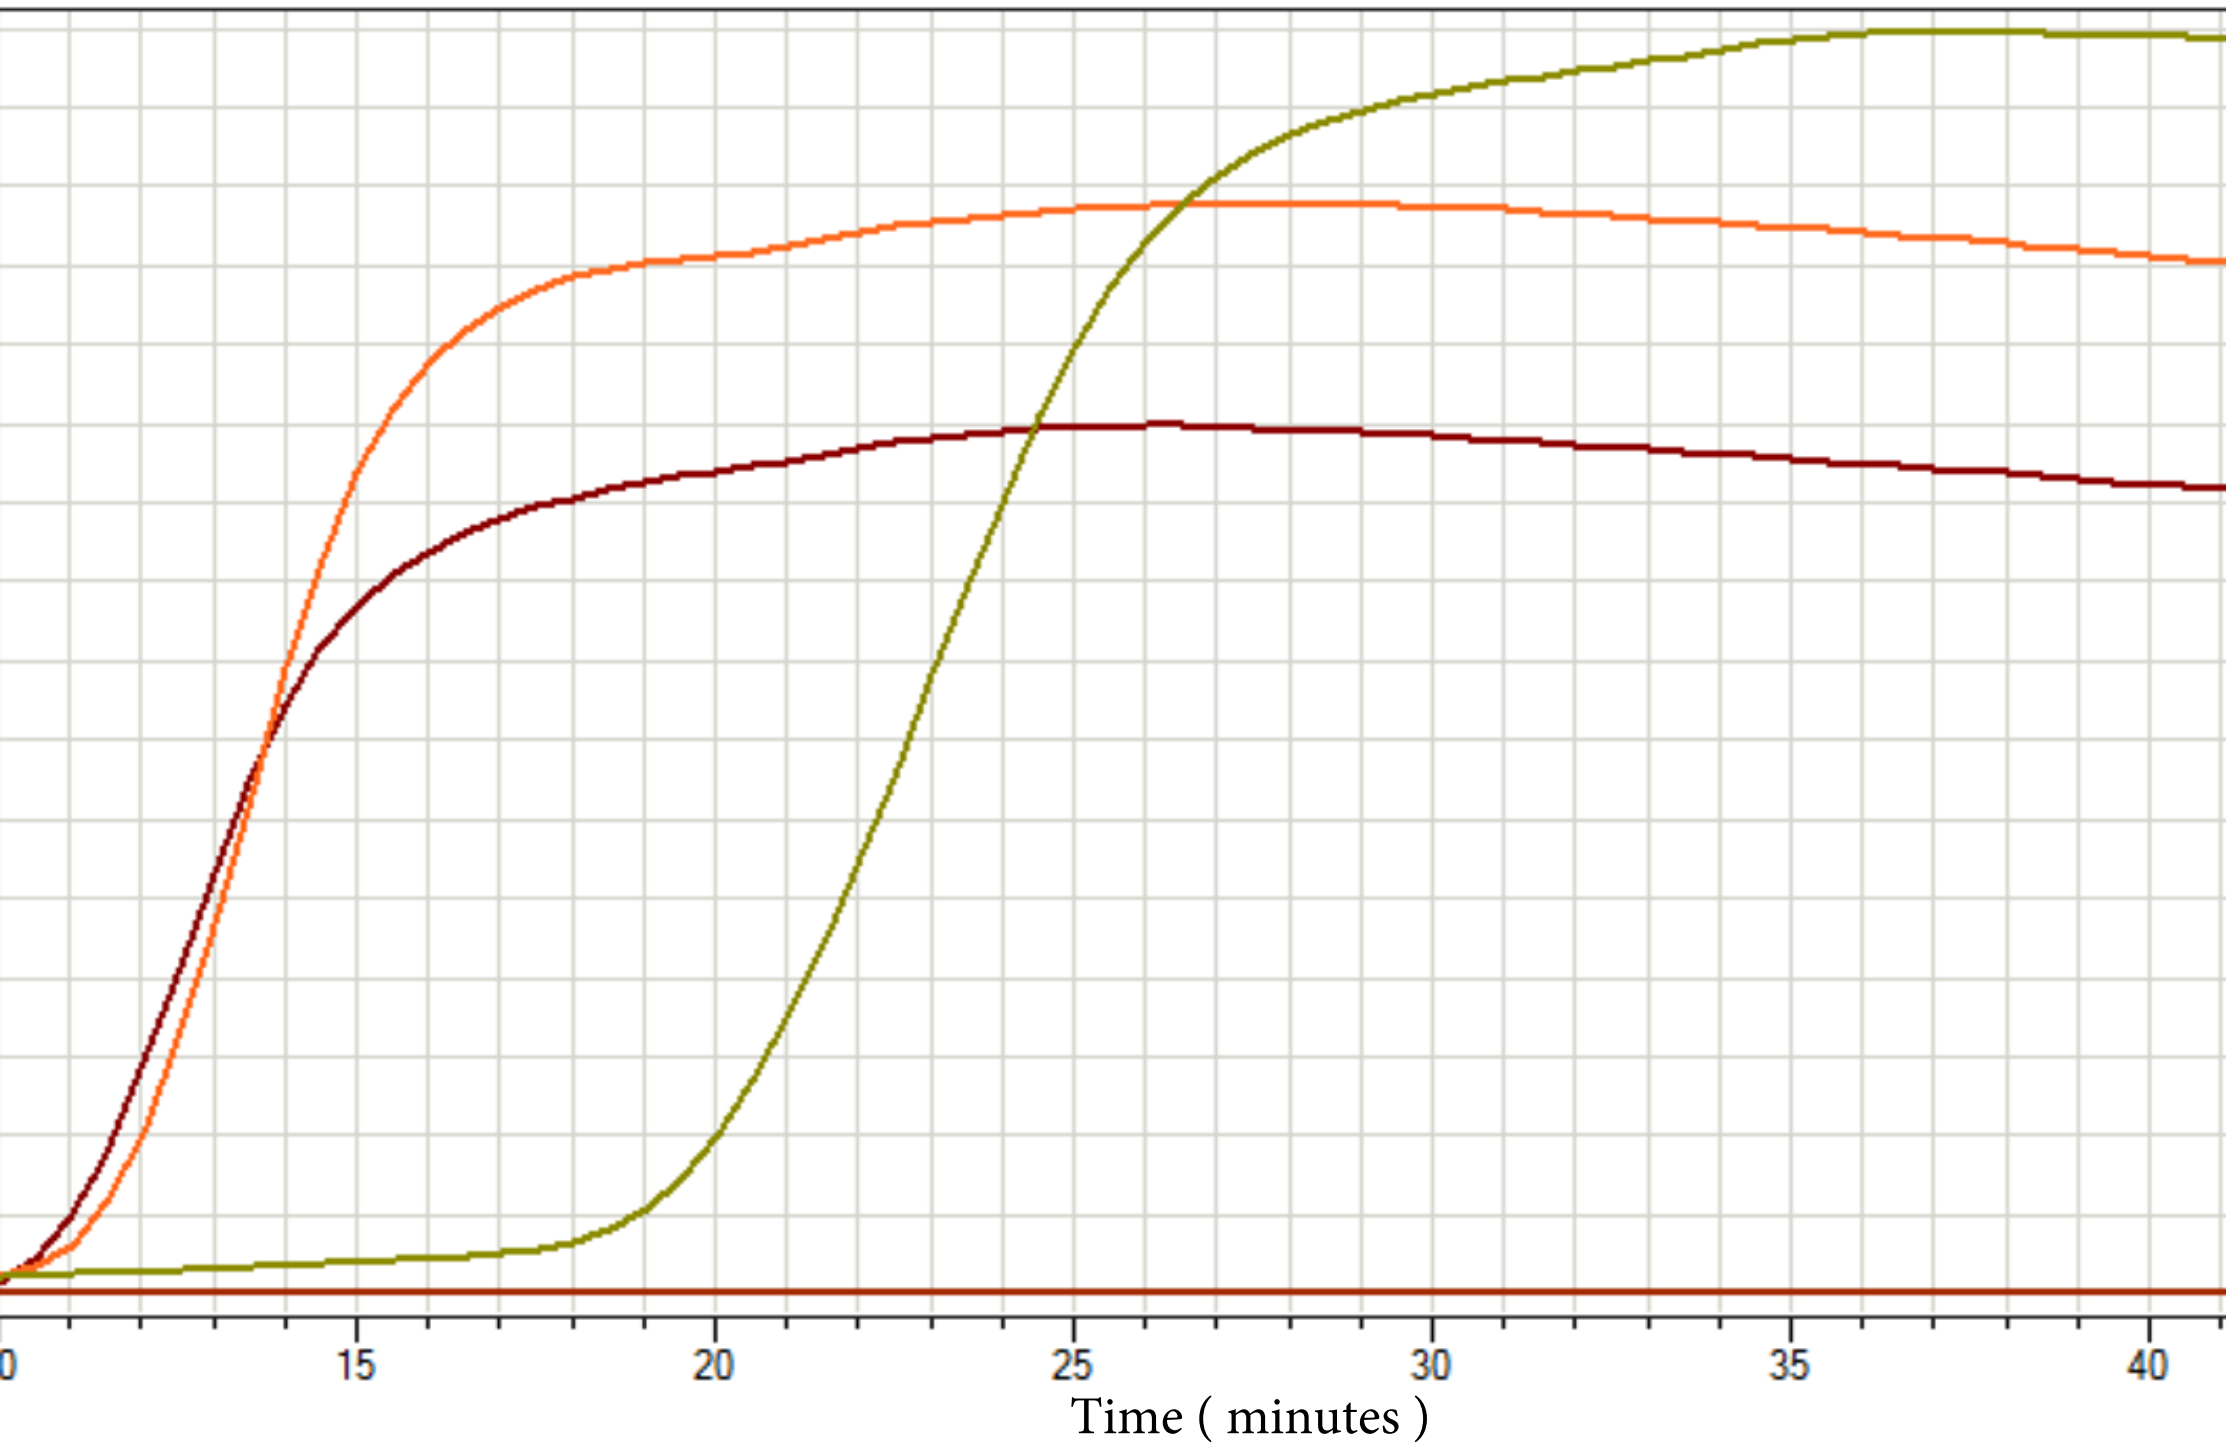

# Algorithm Processing Curve

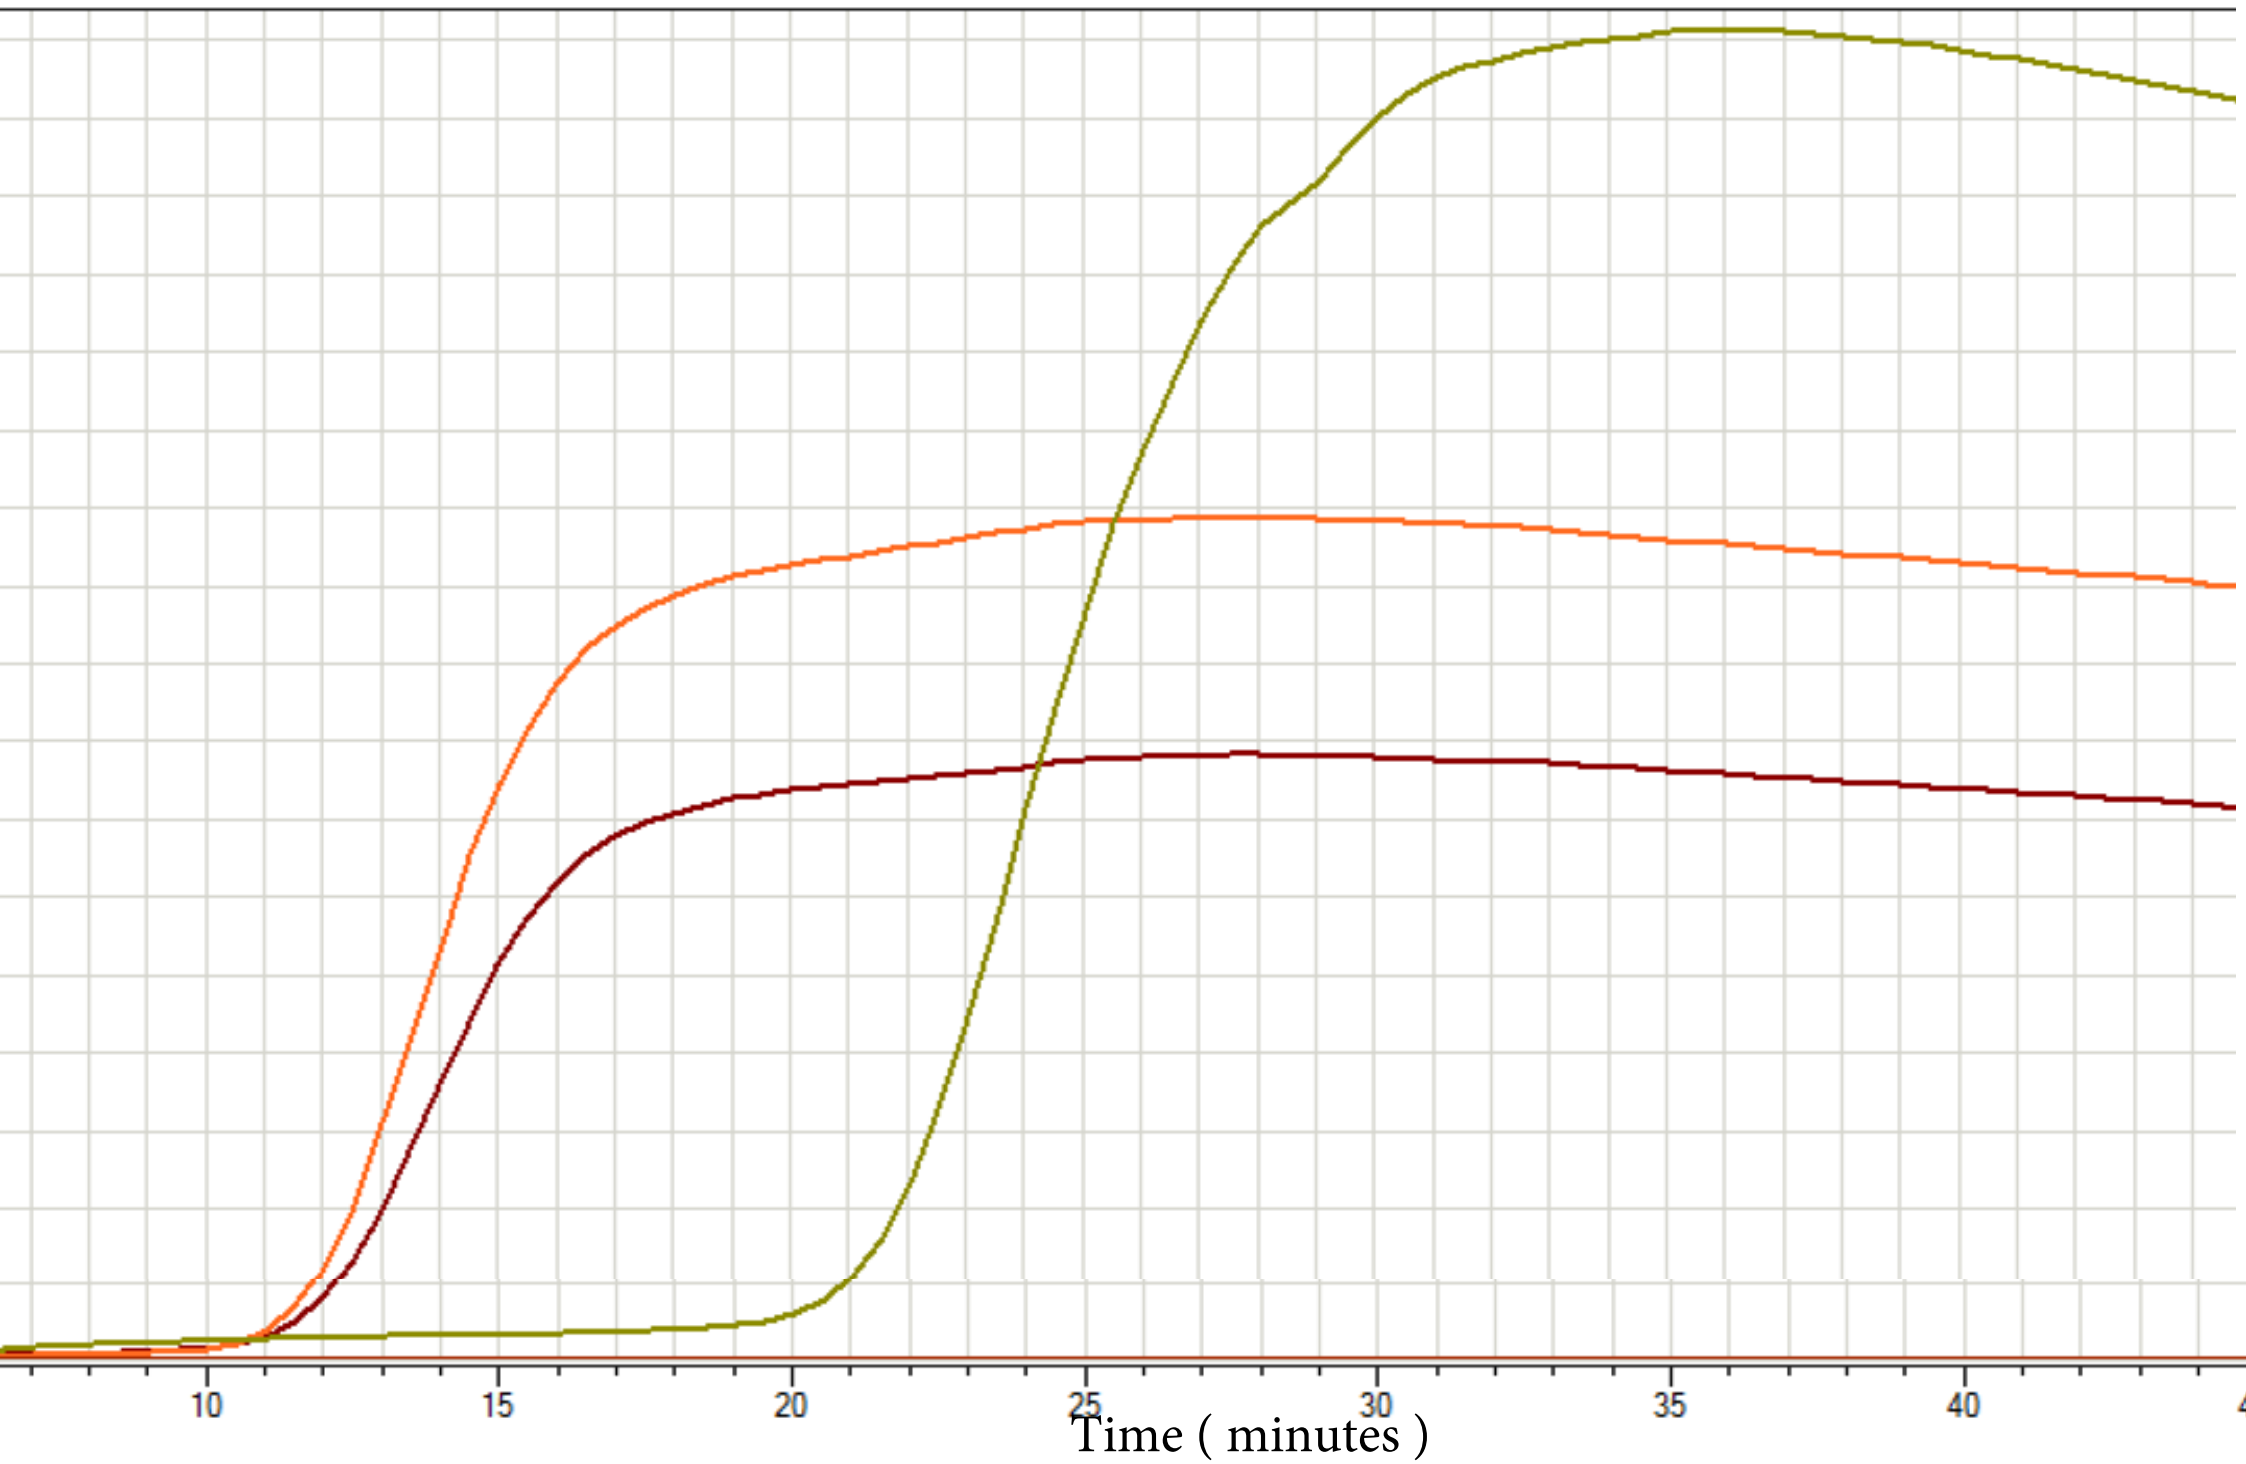

# Algorithm Processing Curve

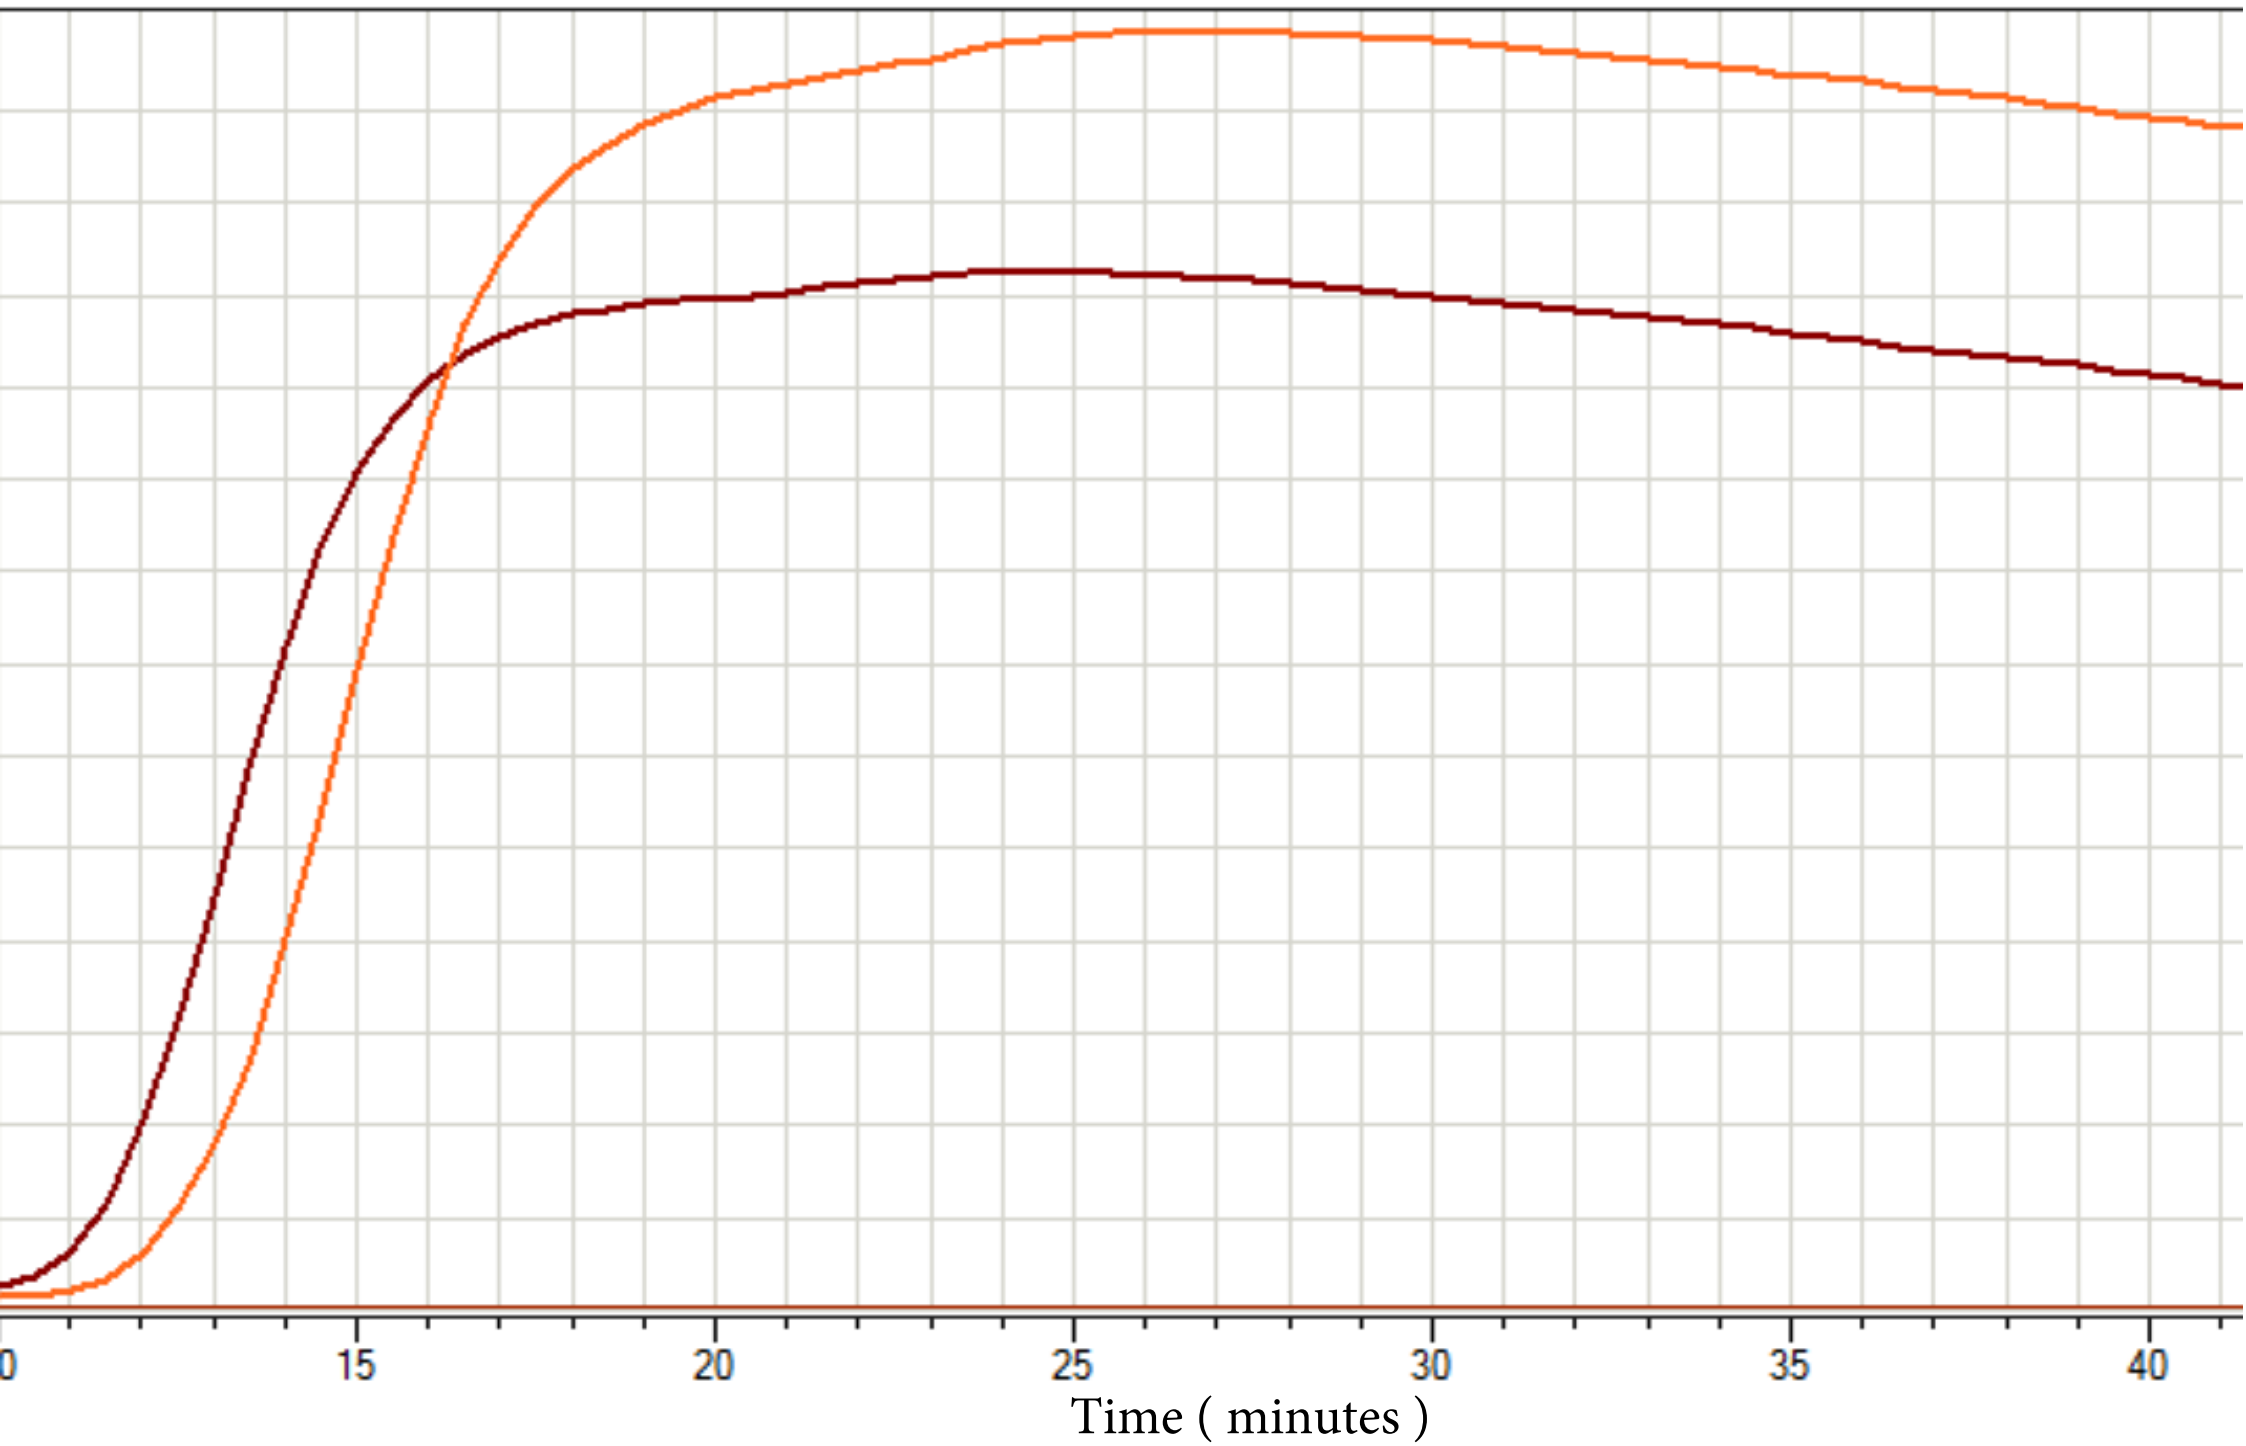

# Algorithm Processing Curve

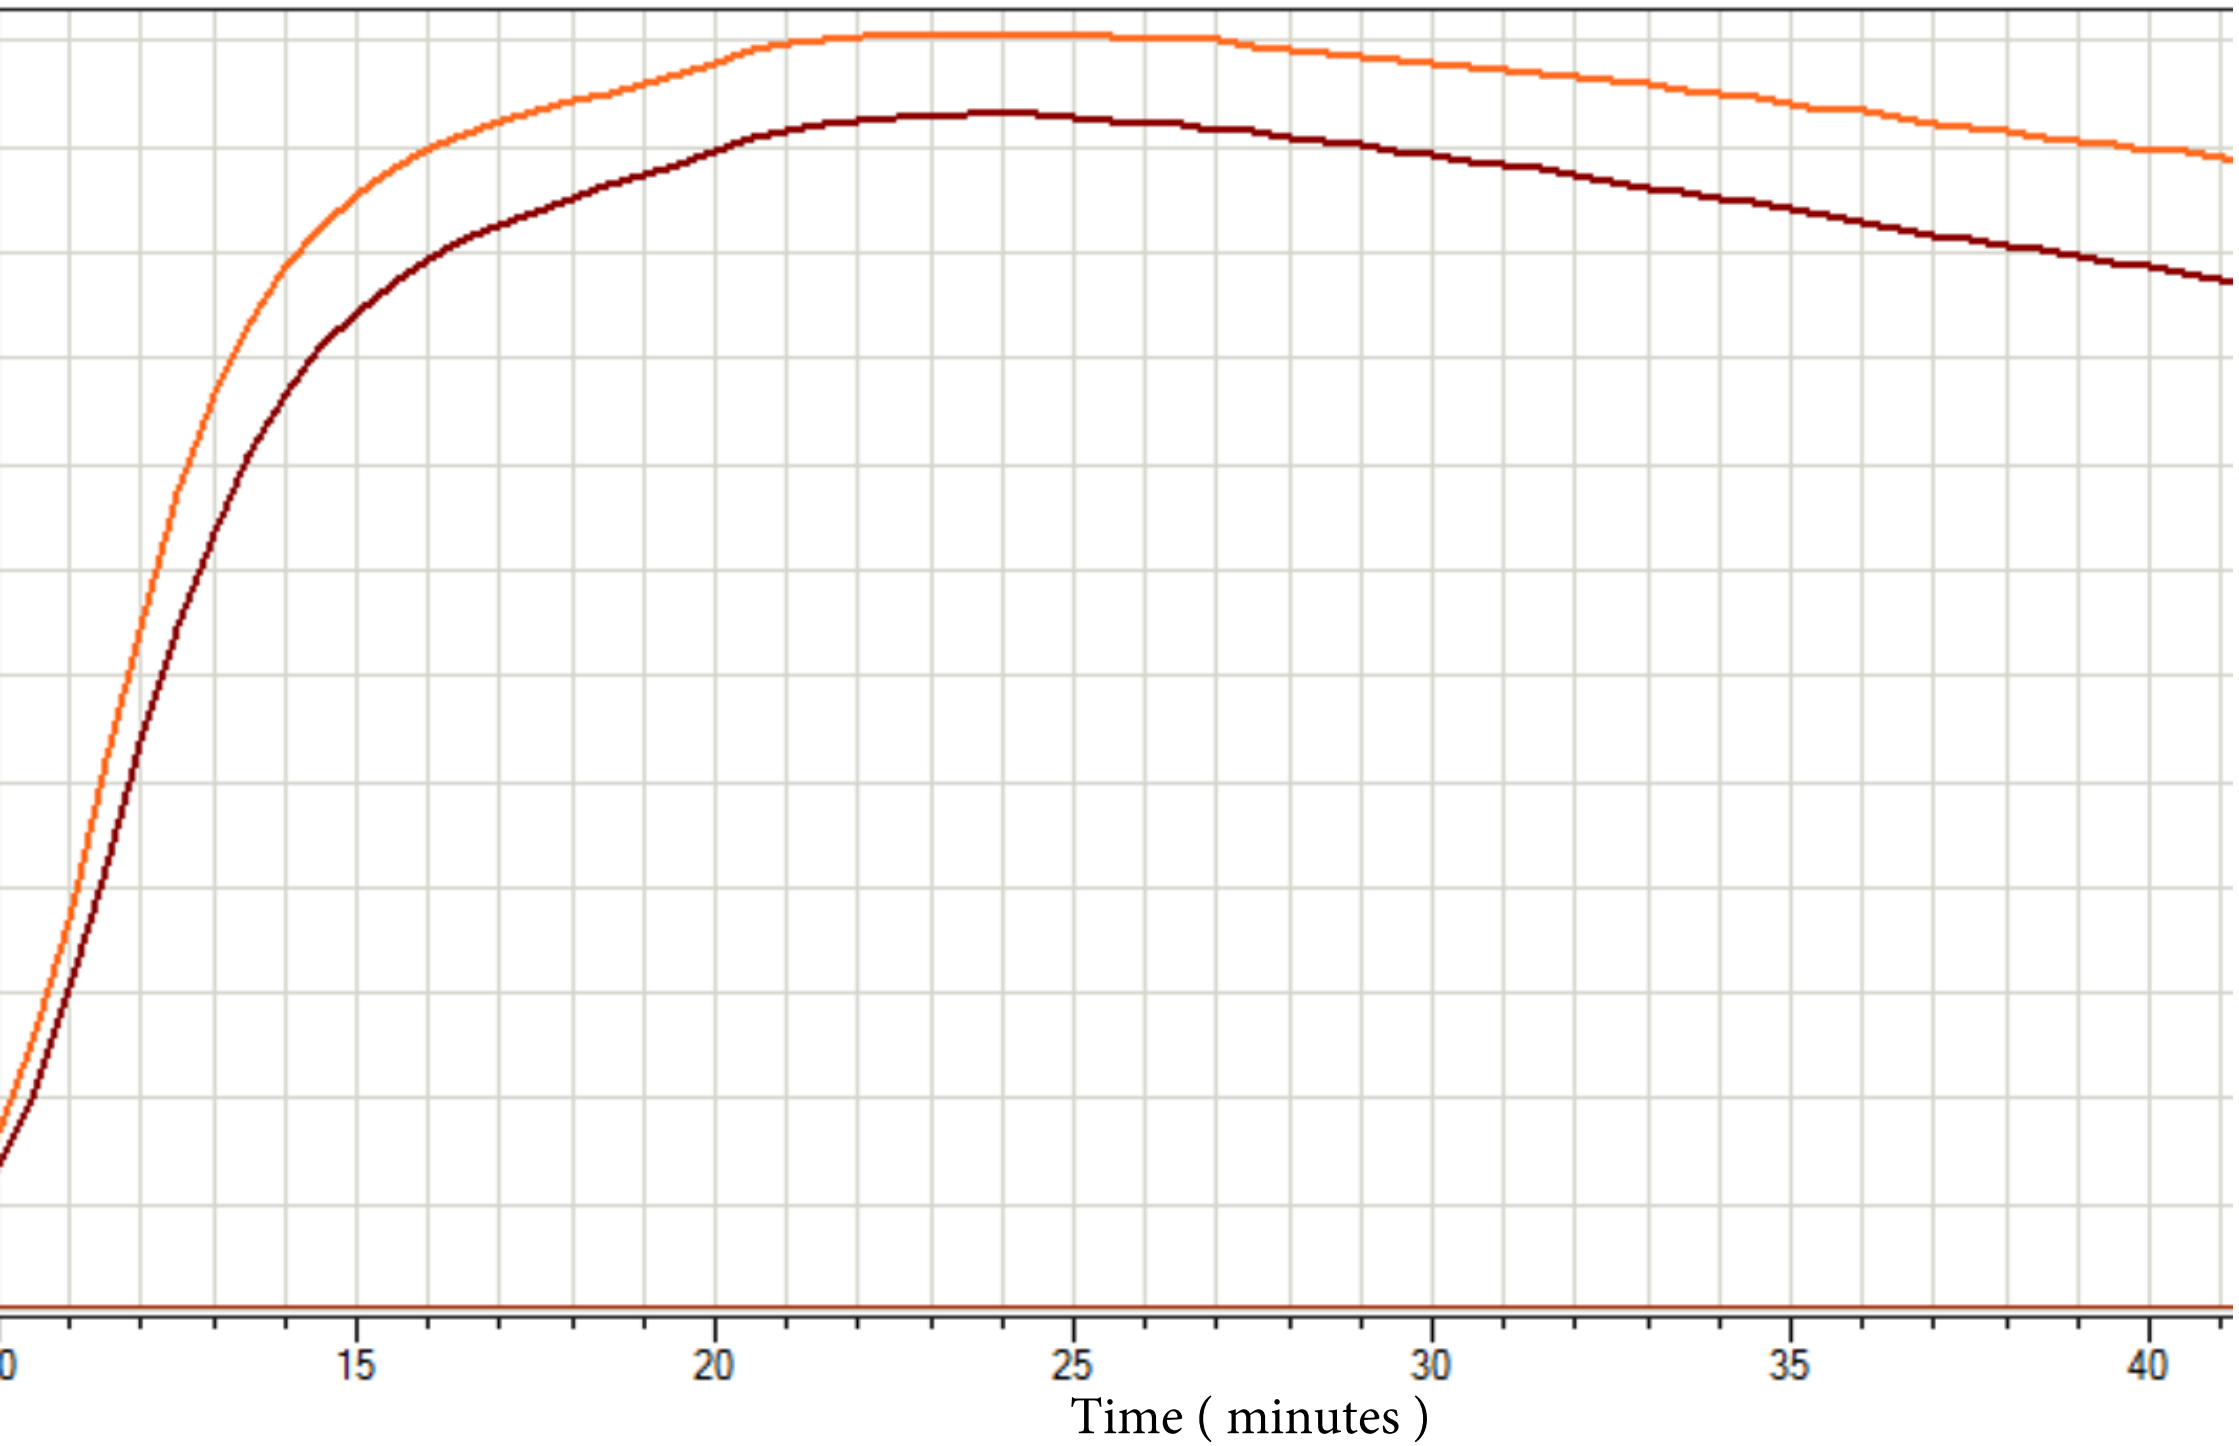



# Algorithm Processing Curve

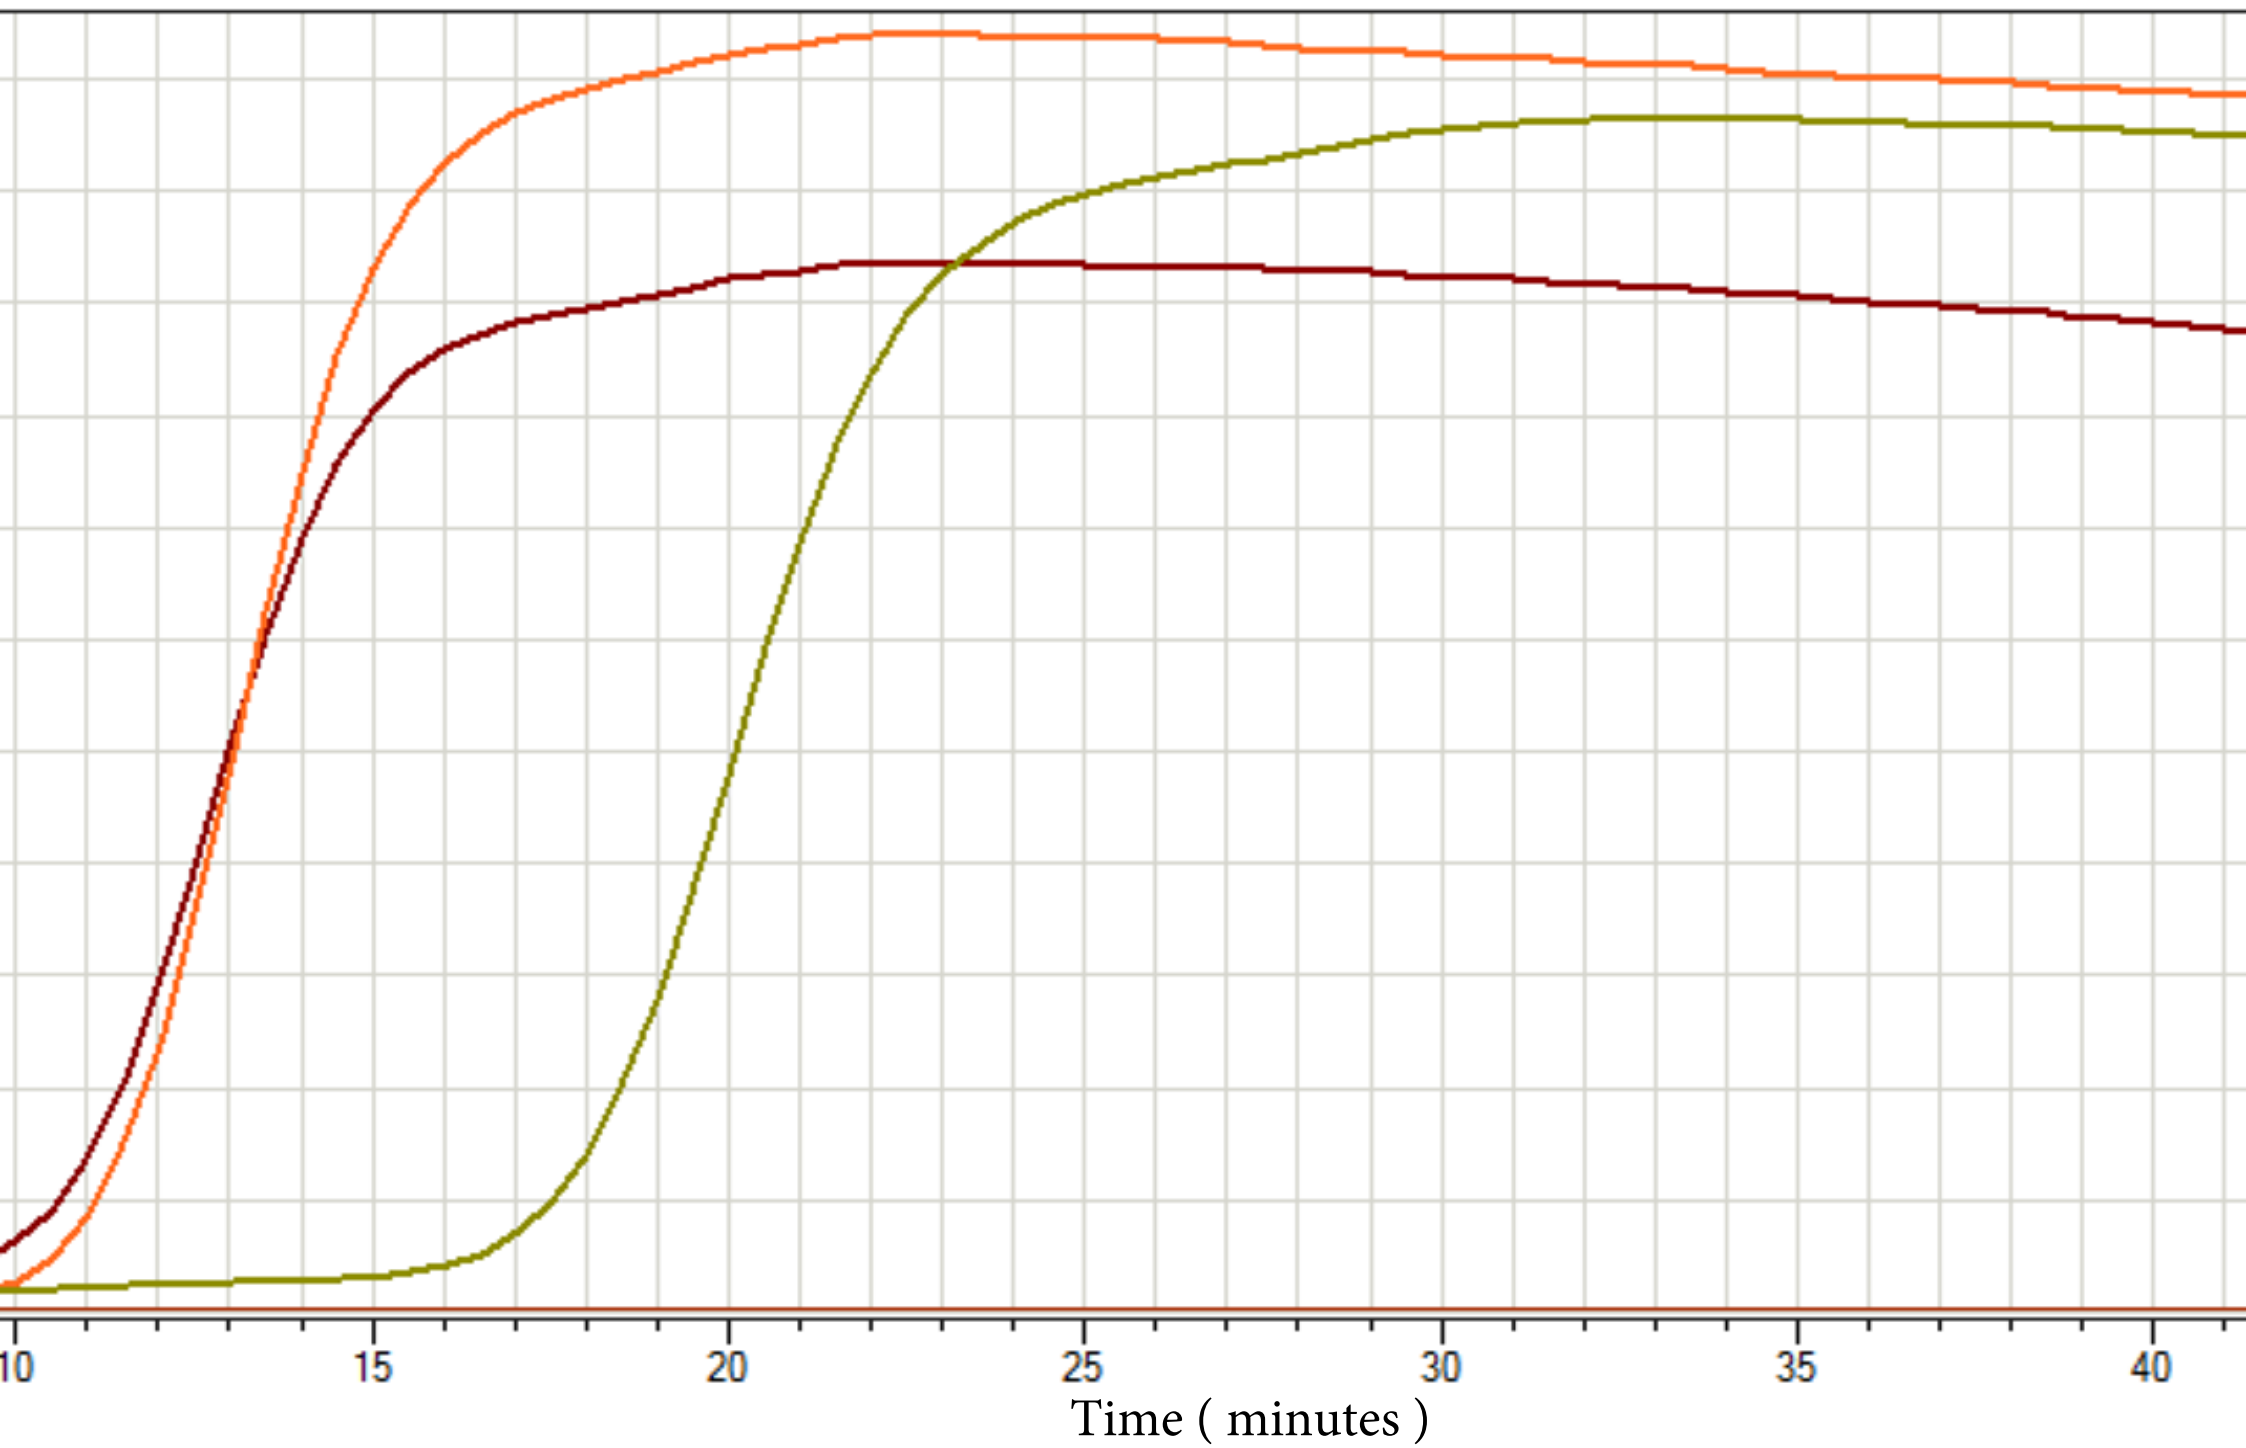

# Algorithm Processing Curve

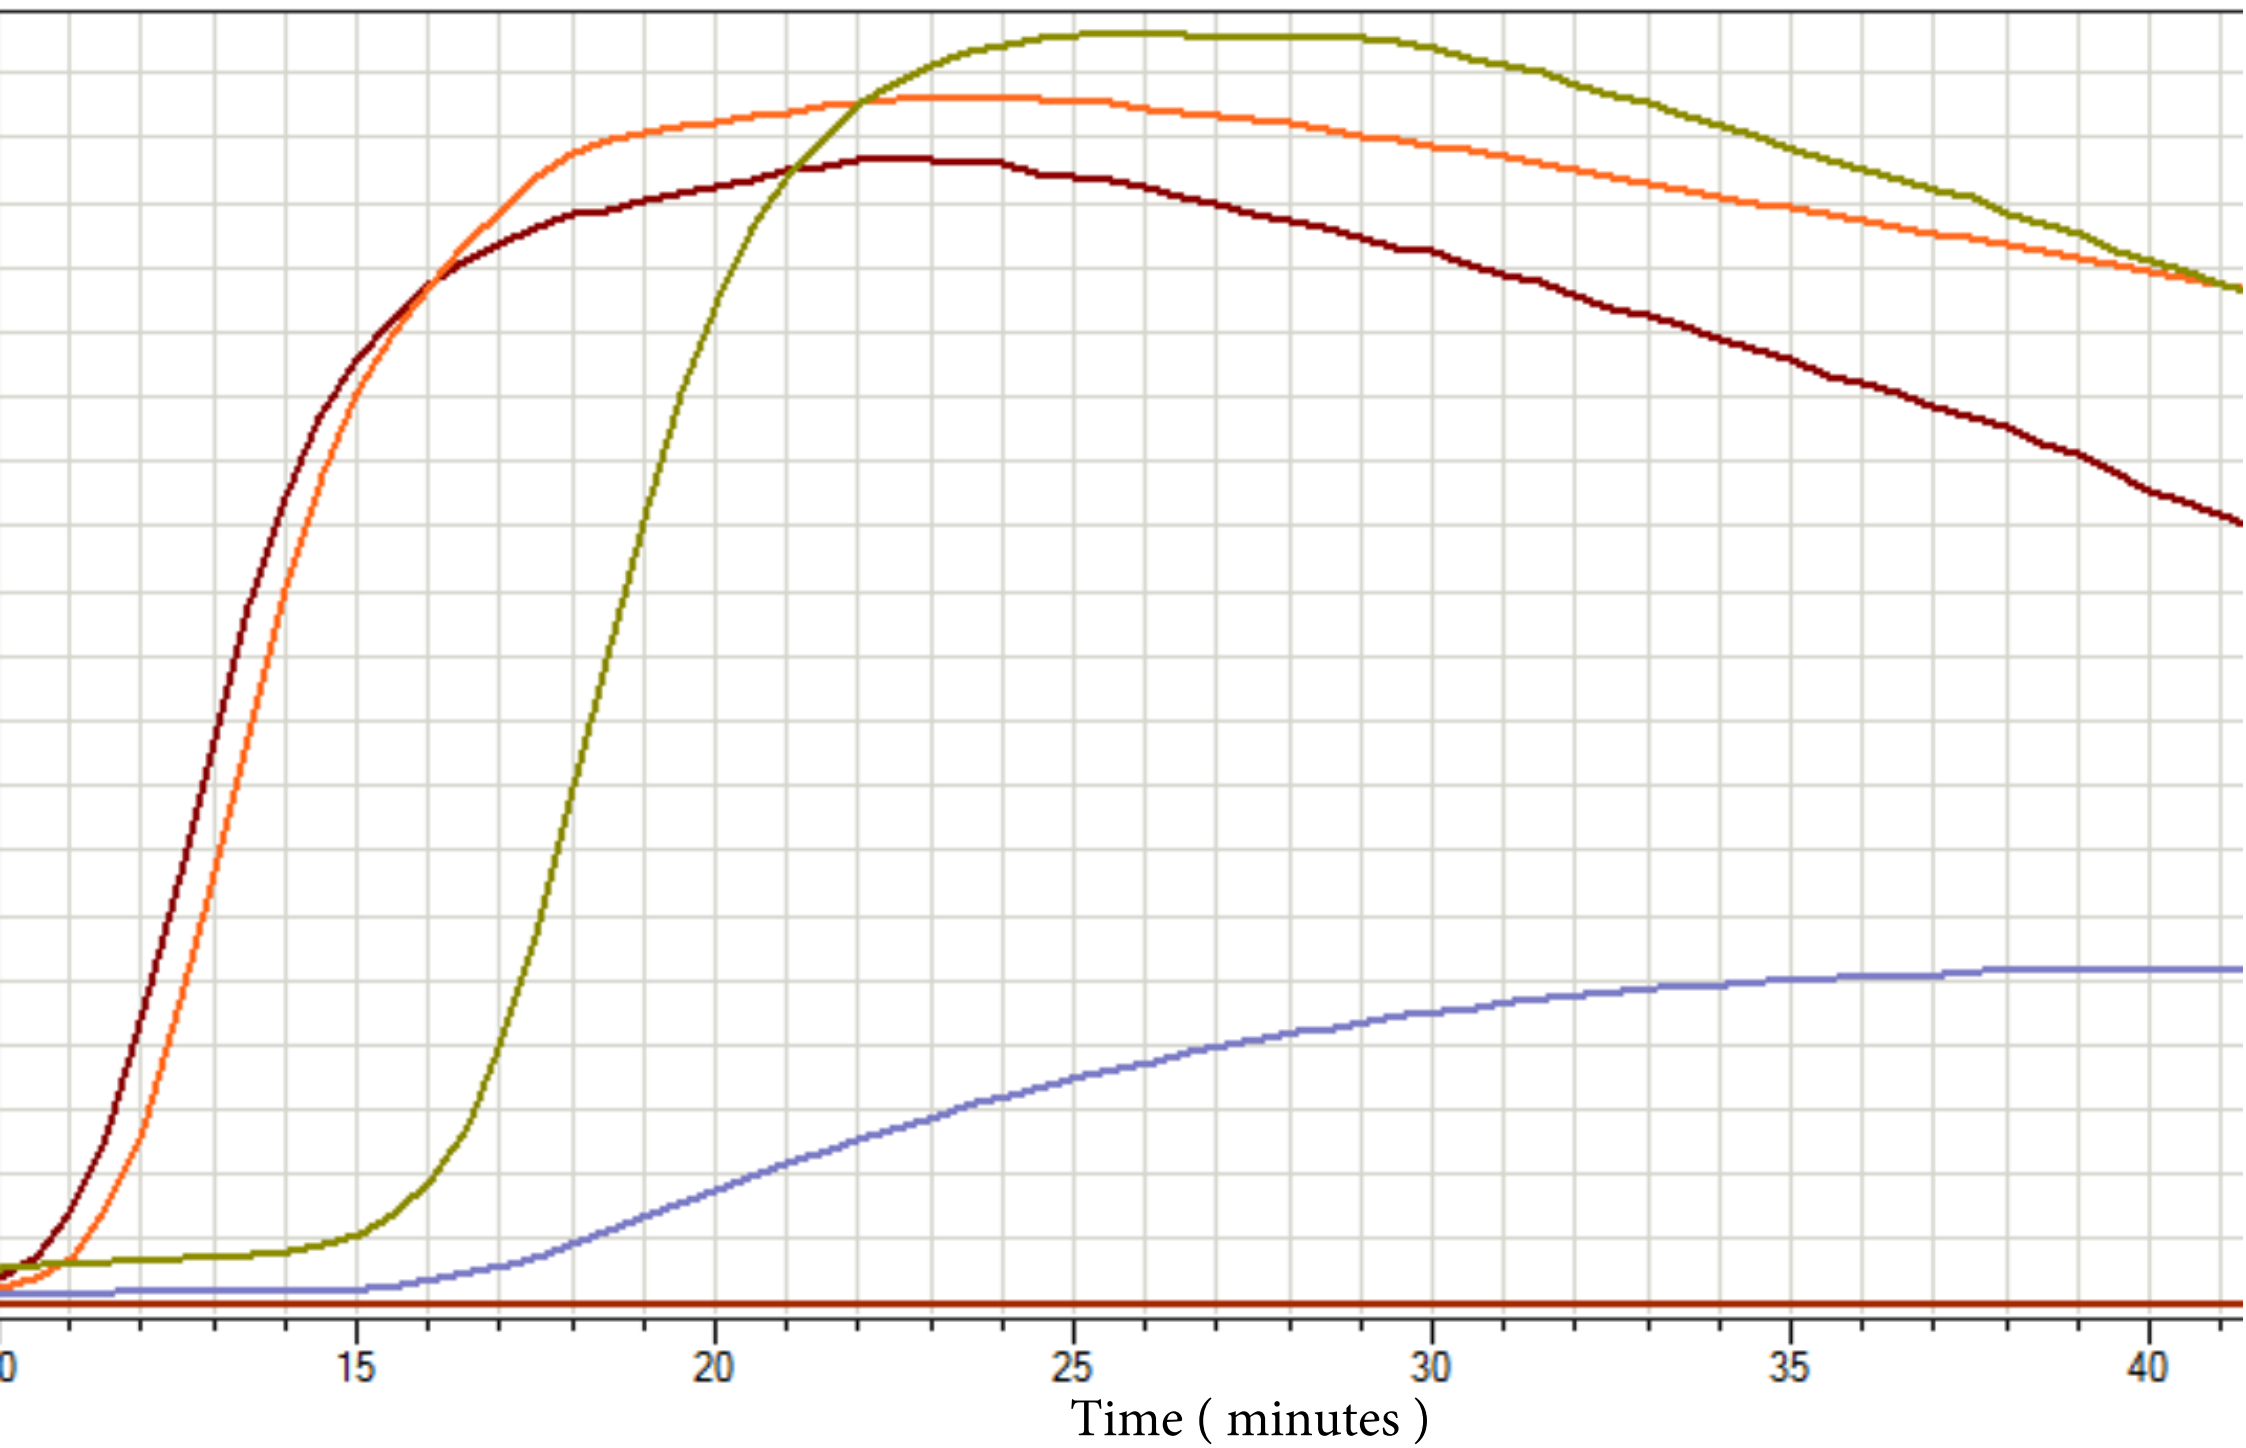

# Algorithm Processing Curve

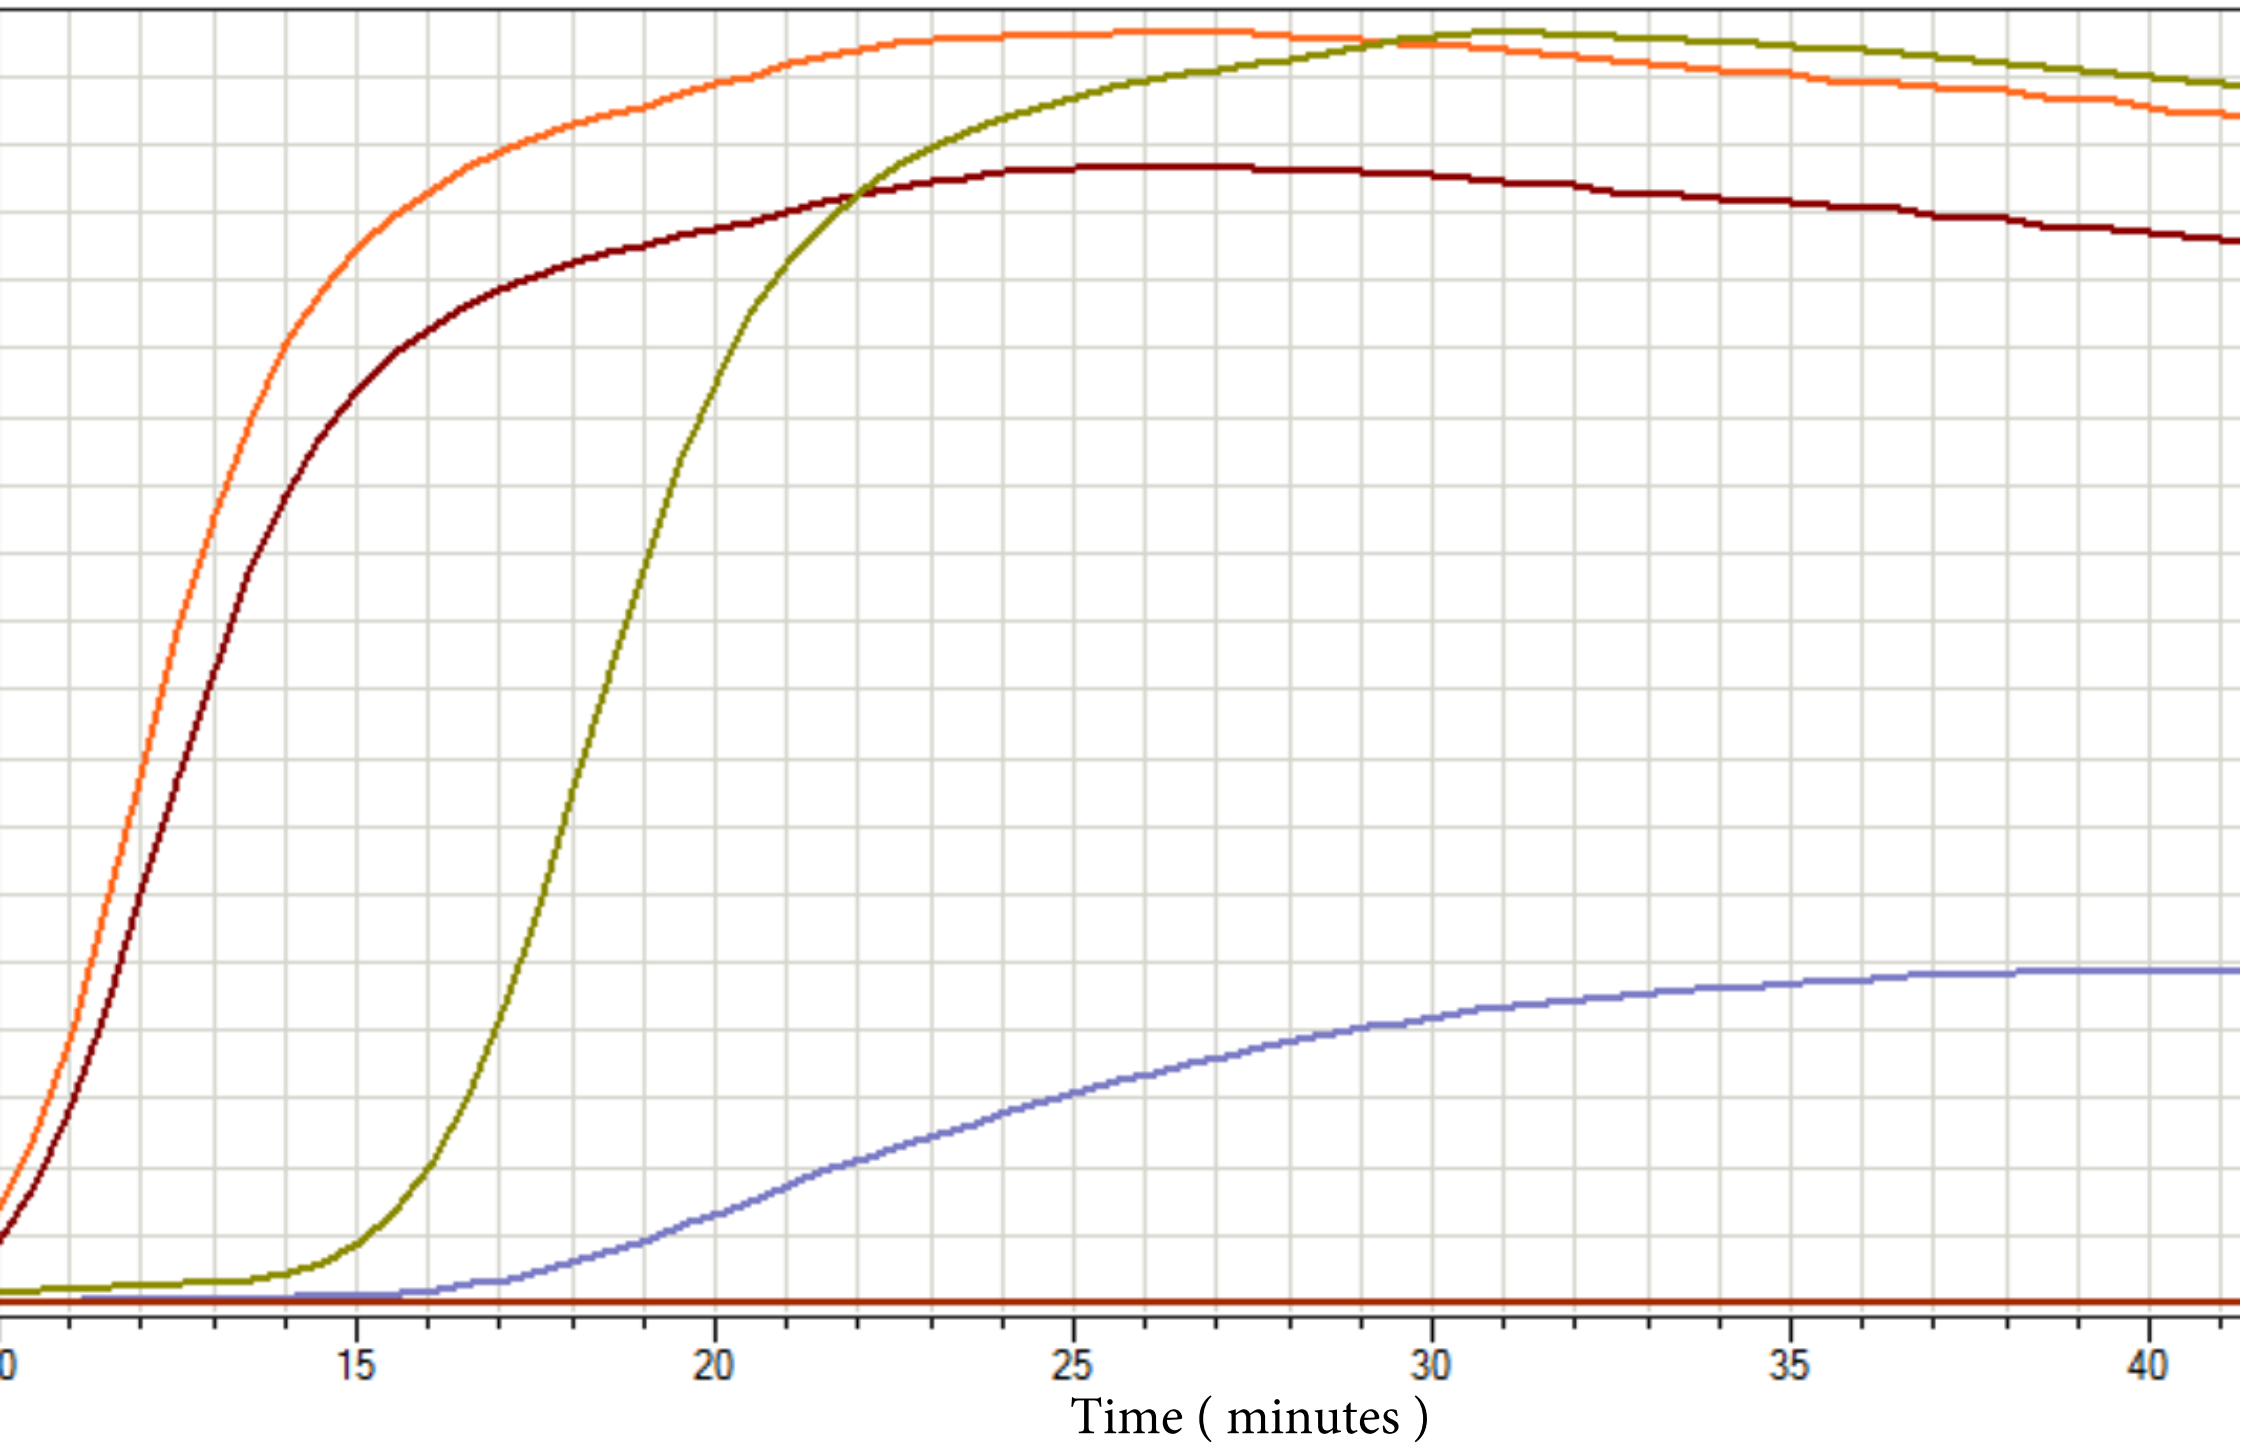

# Algorithm Processing Curve

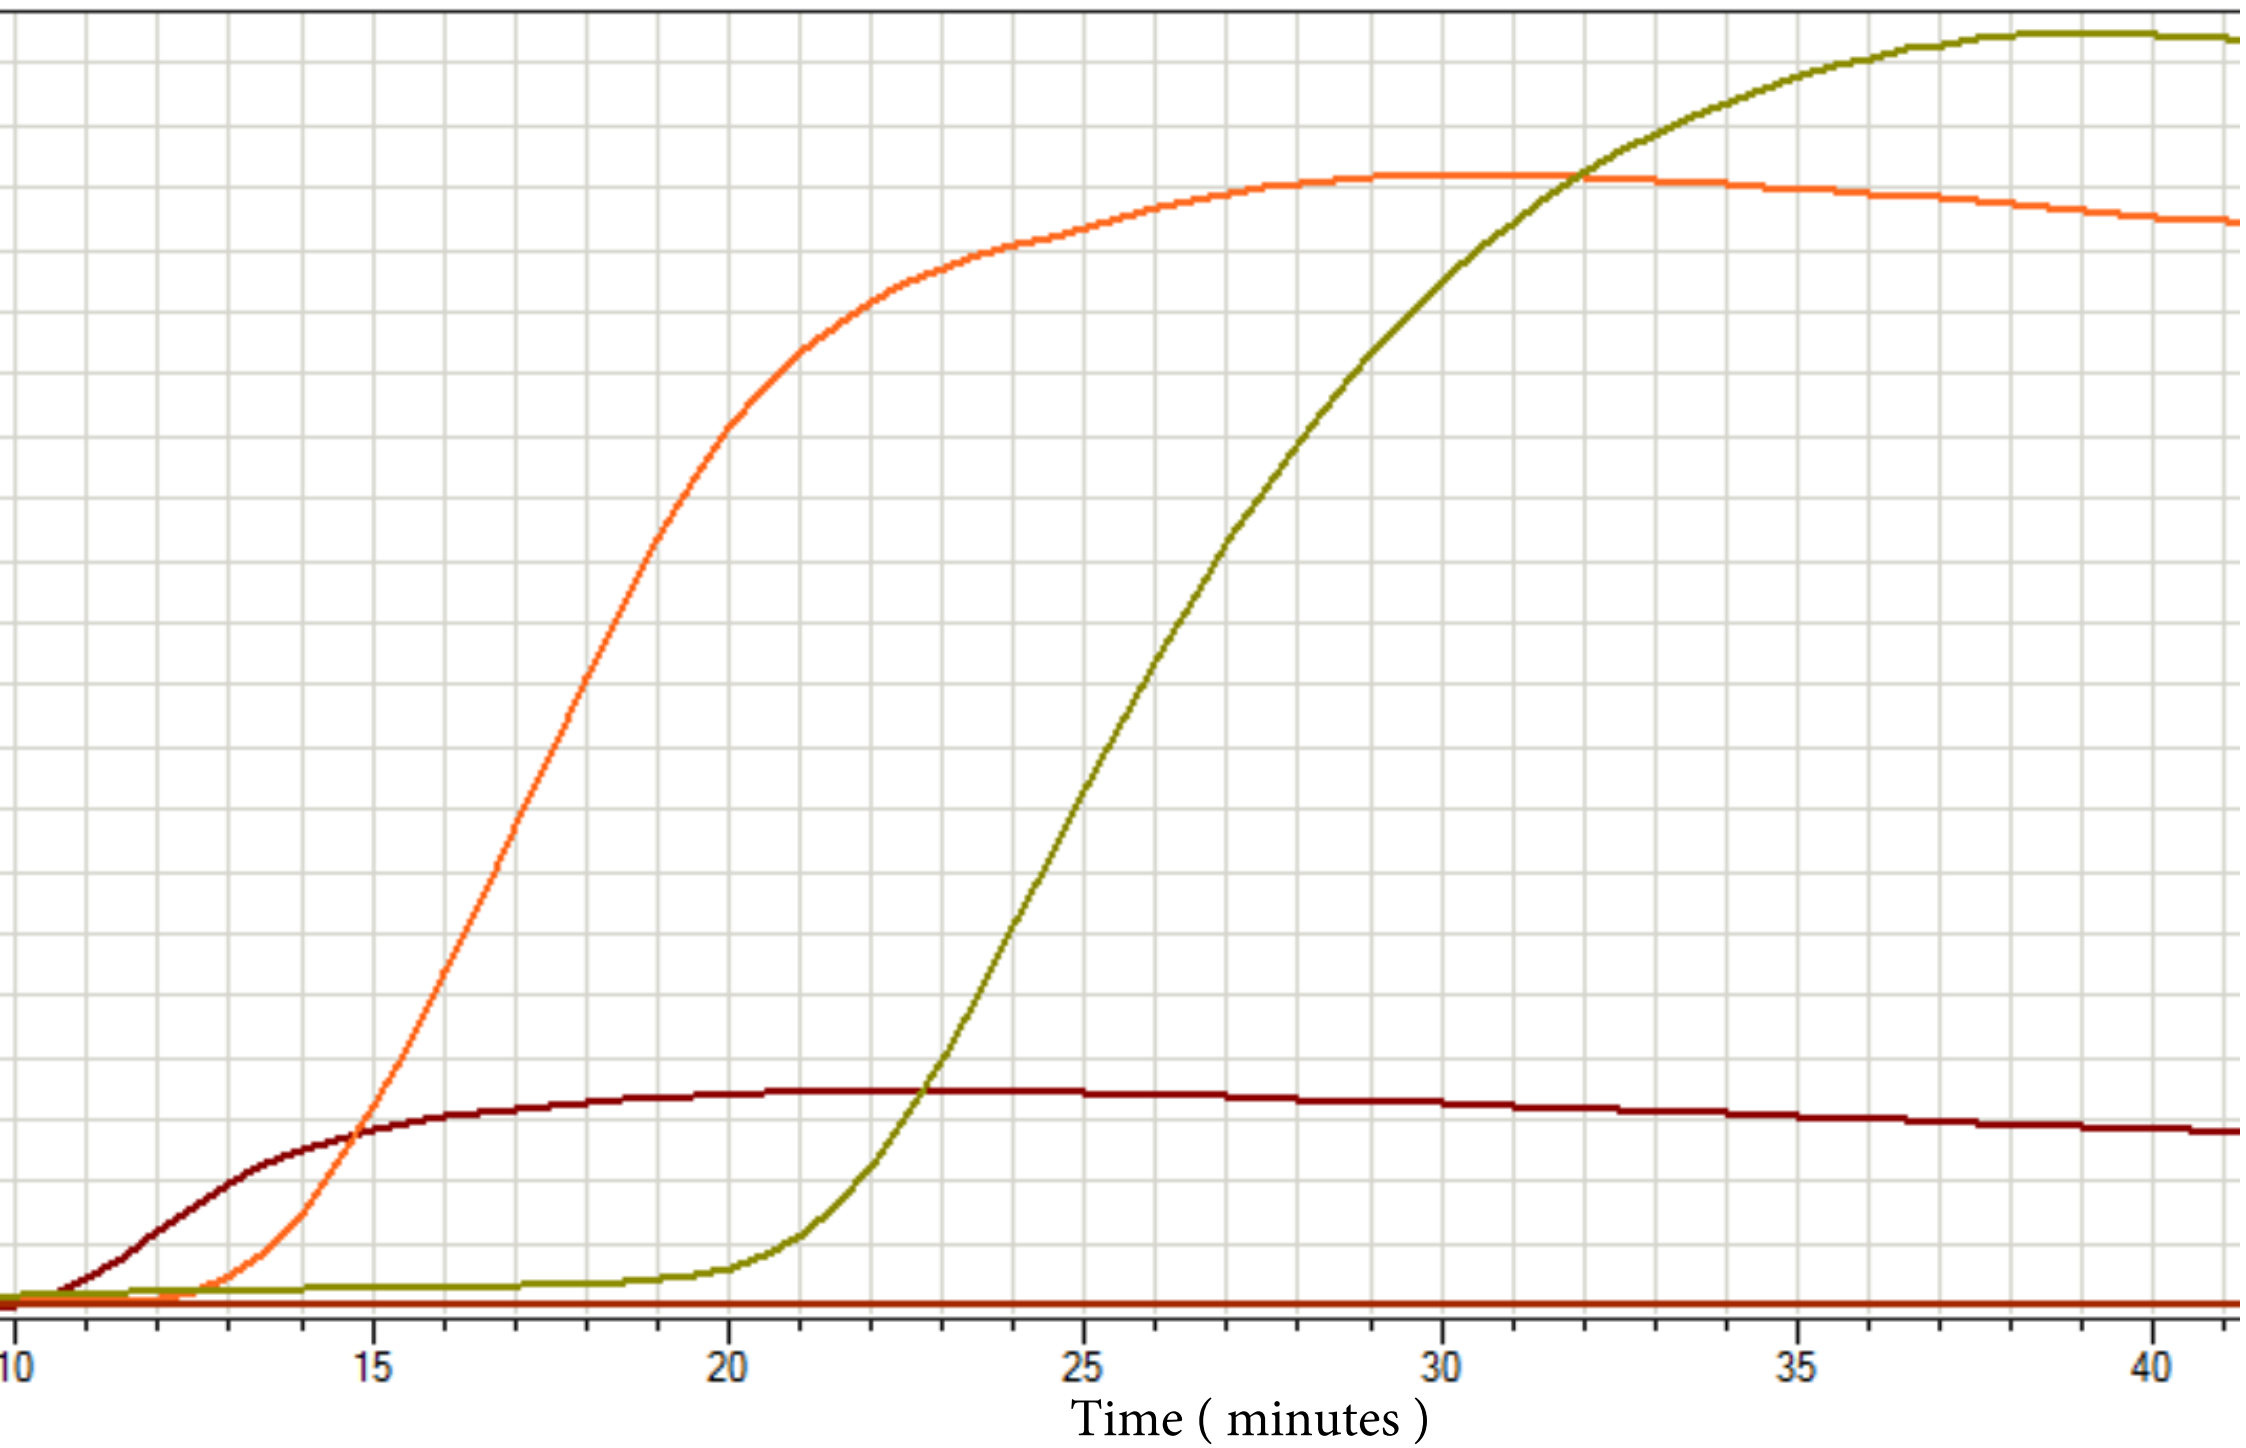

# Algorithm Processing Curve

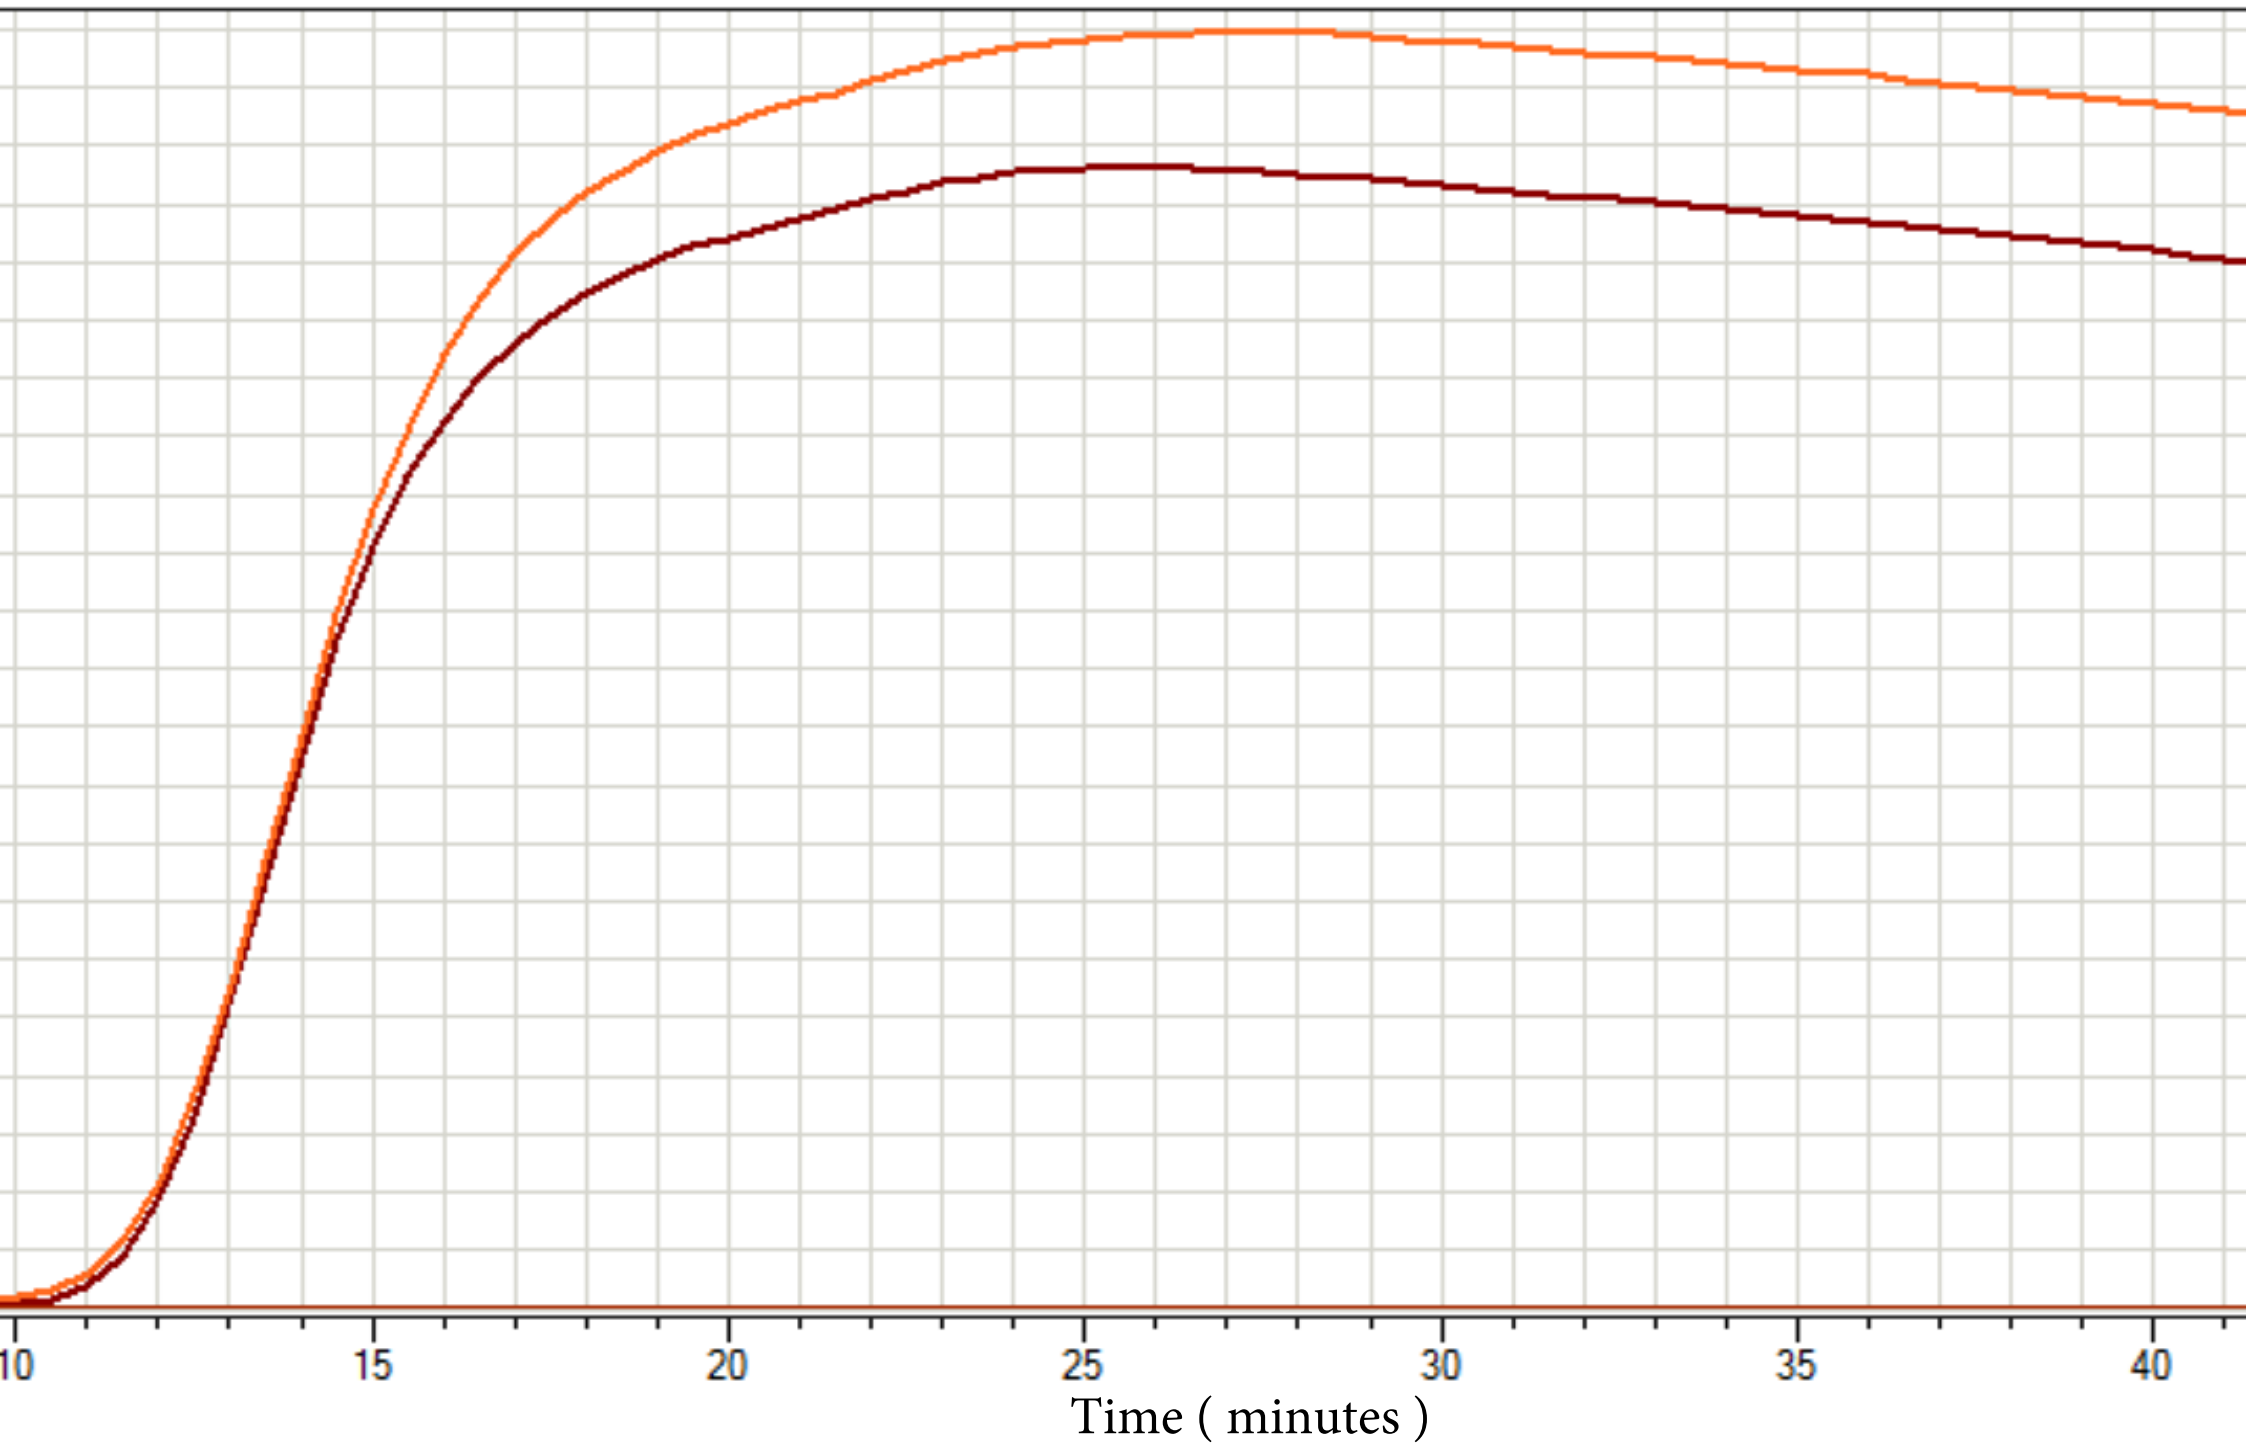

# Algorithm Processing Curve

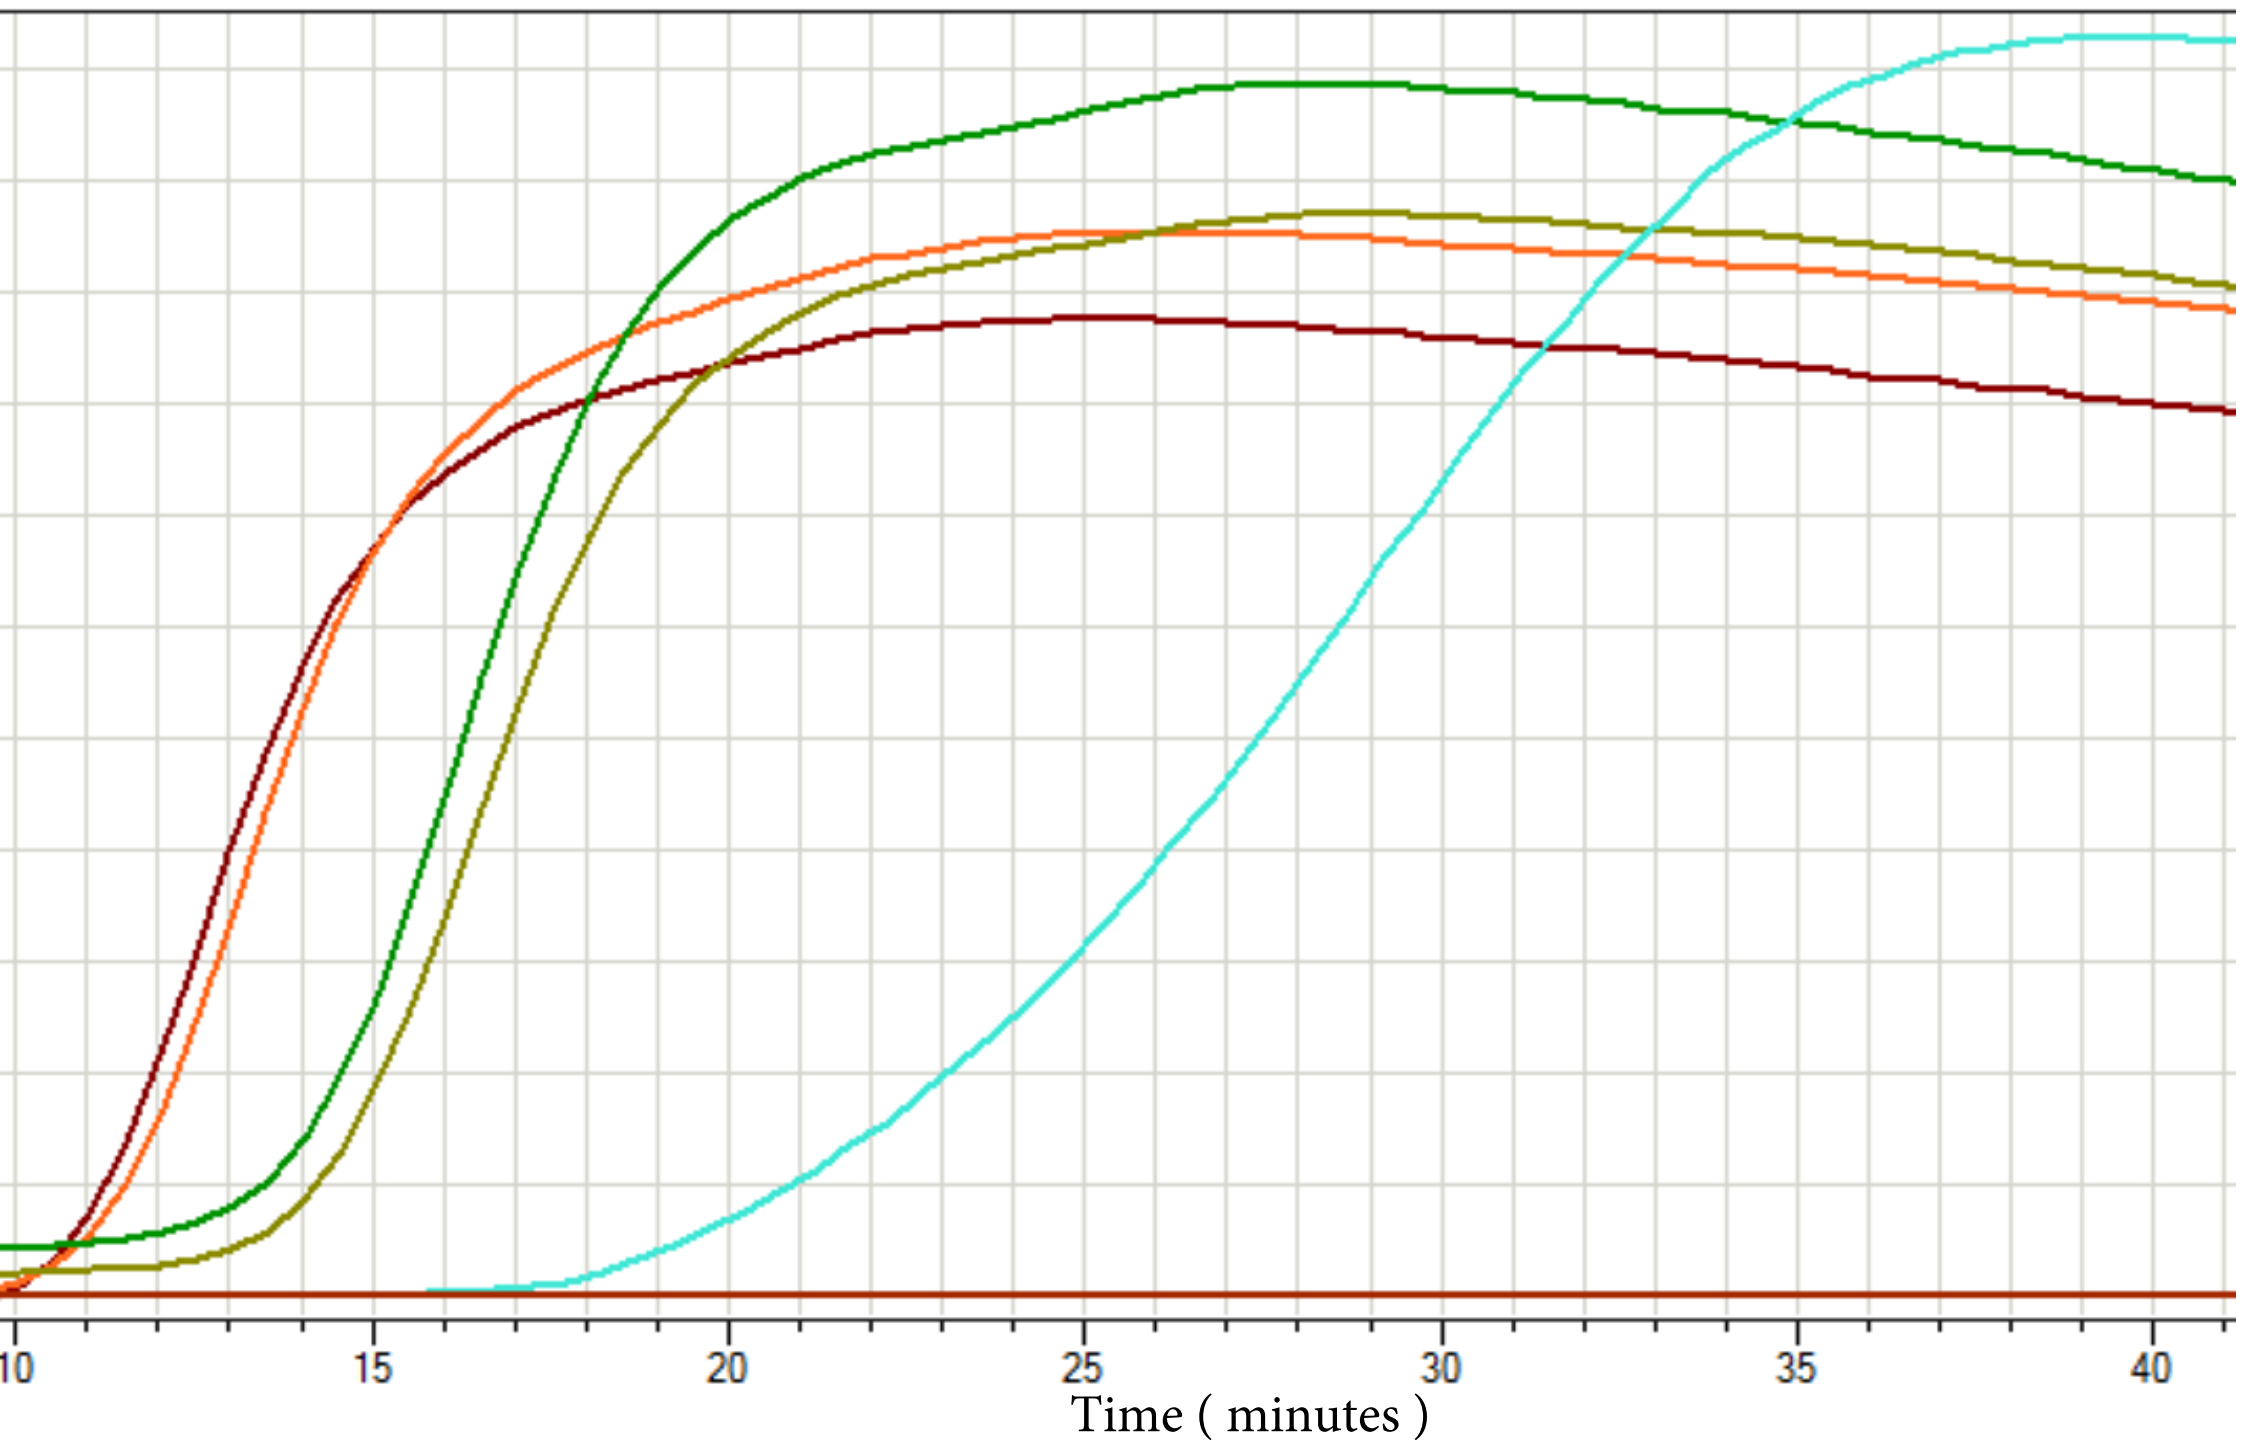

# Algorithm Processing Curve

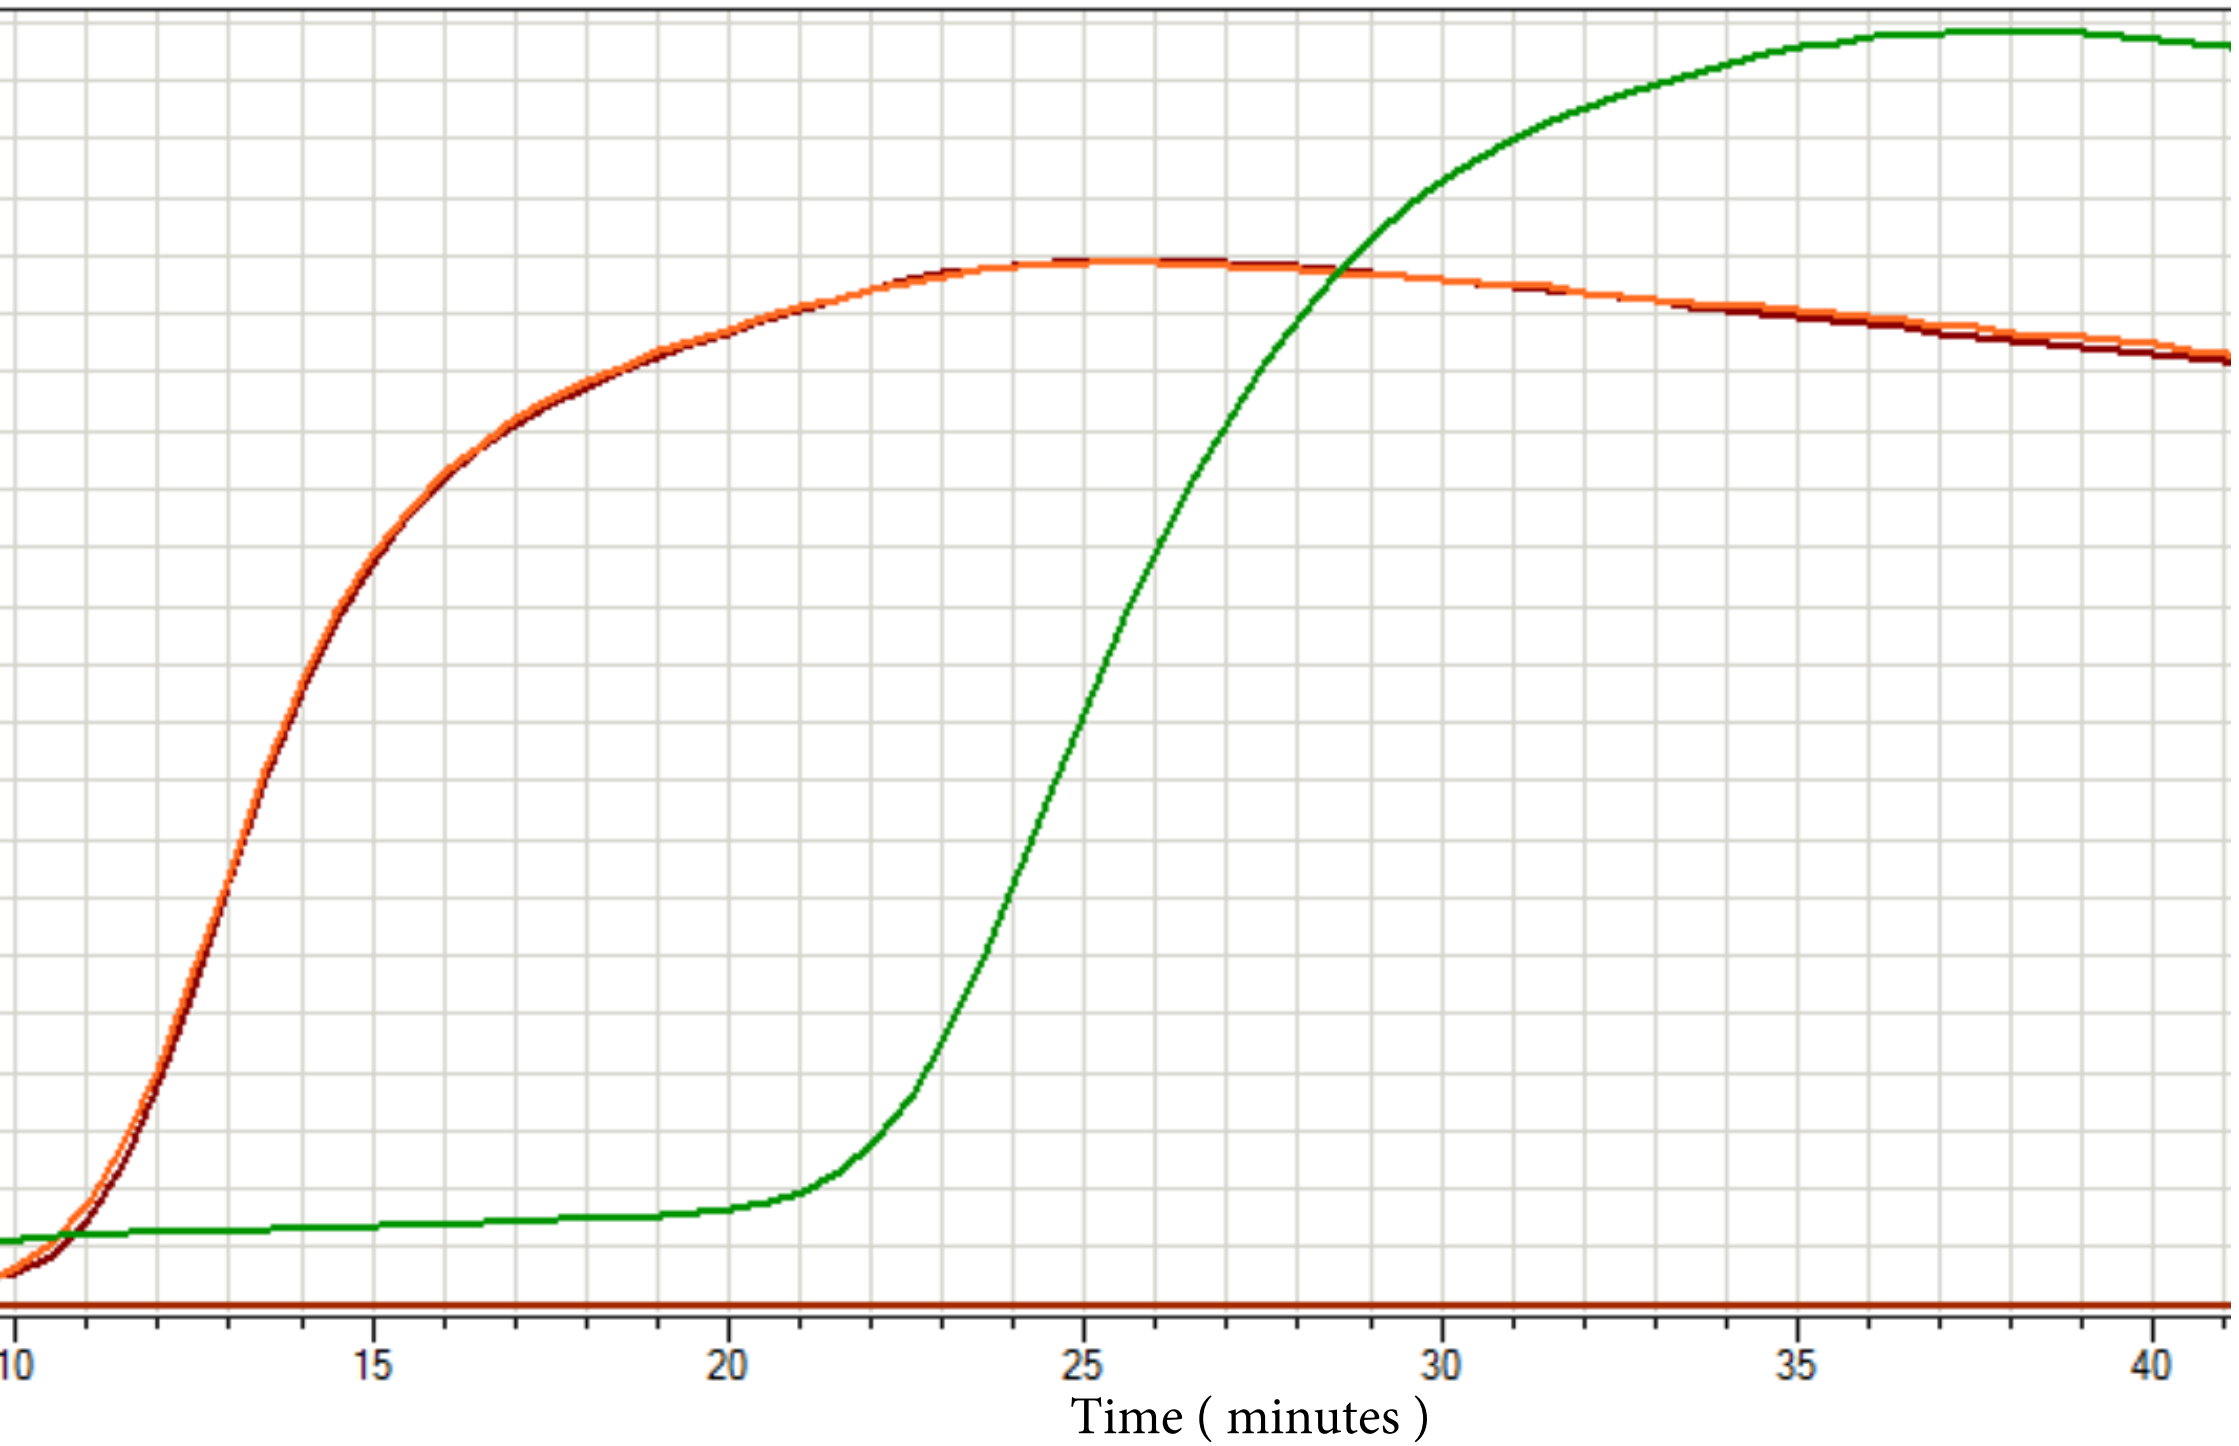

# Algorithm Processing Curve

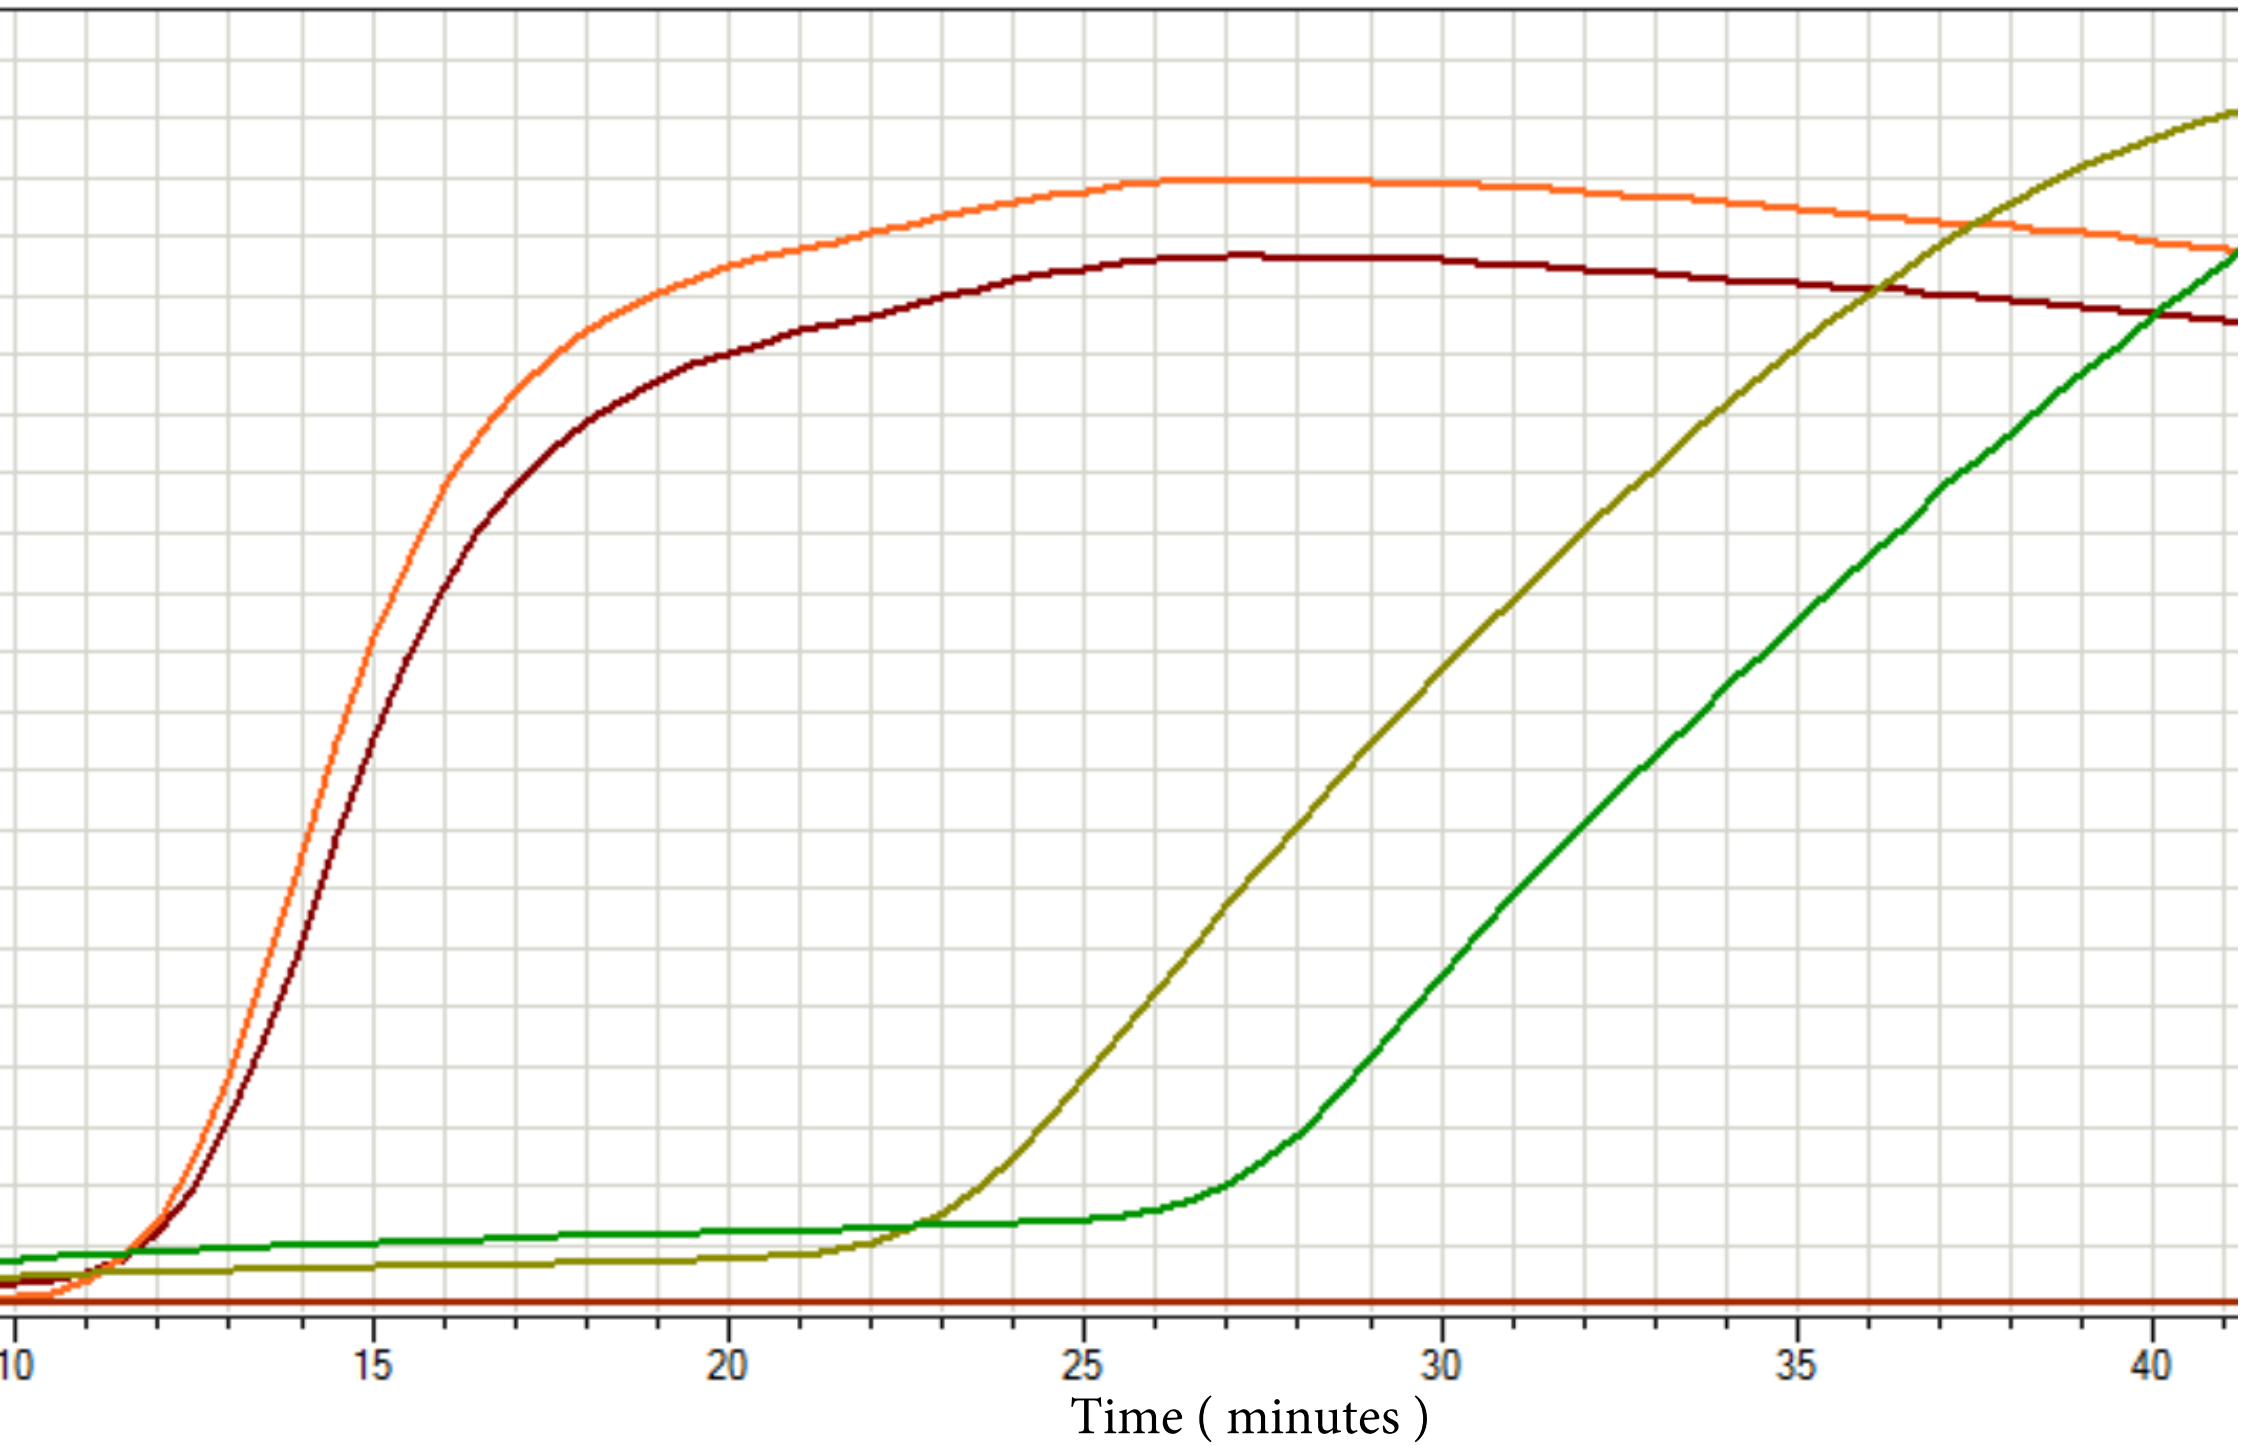



# Algorithm Processing Curve

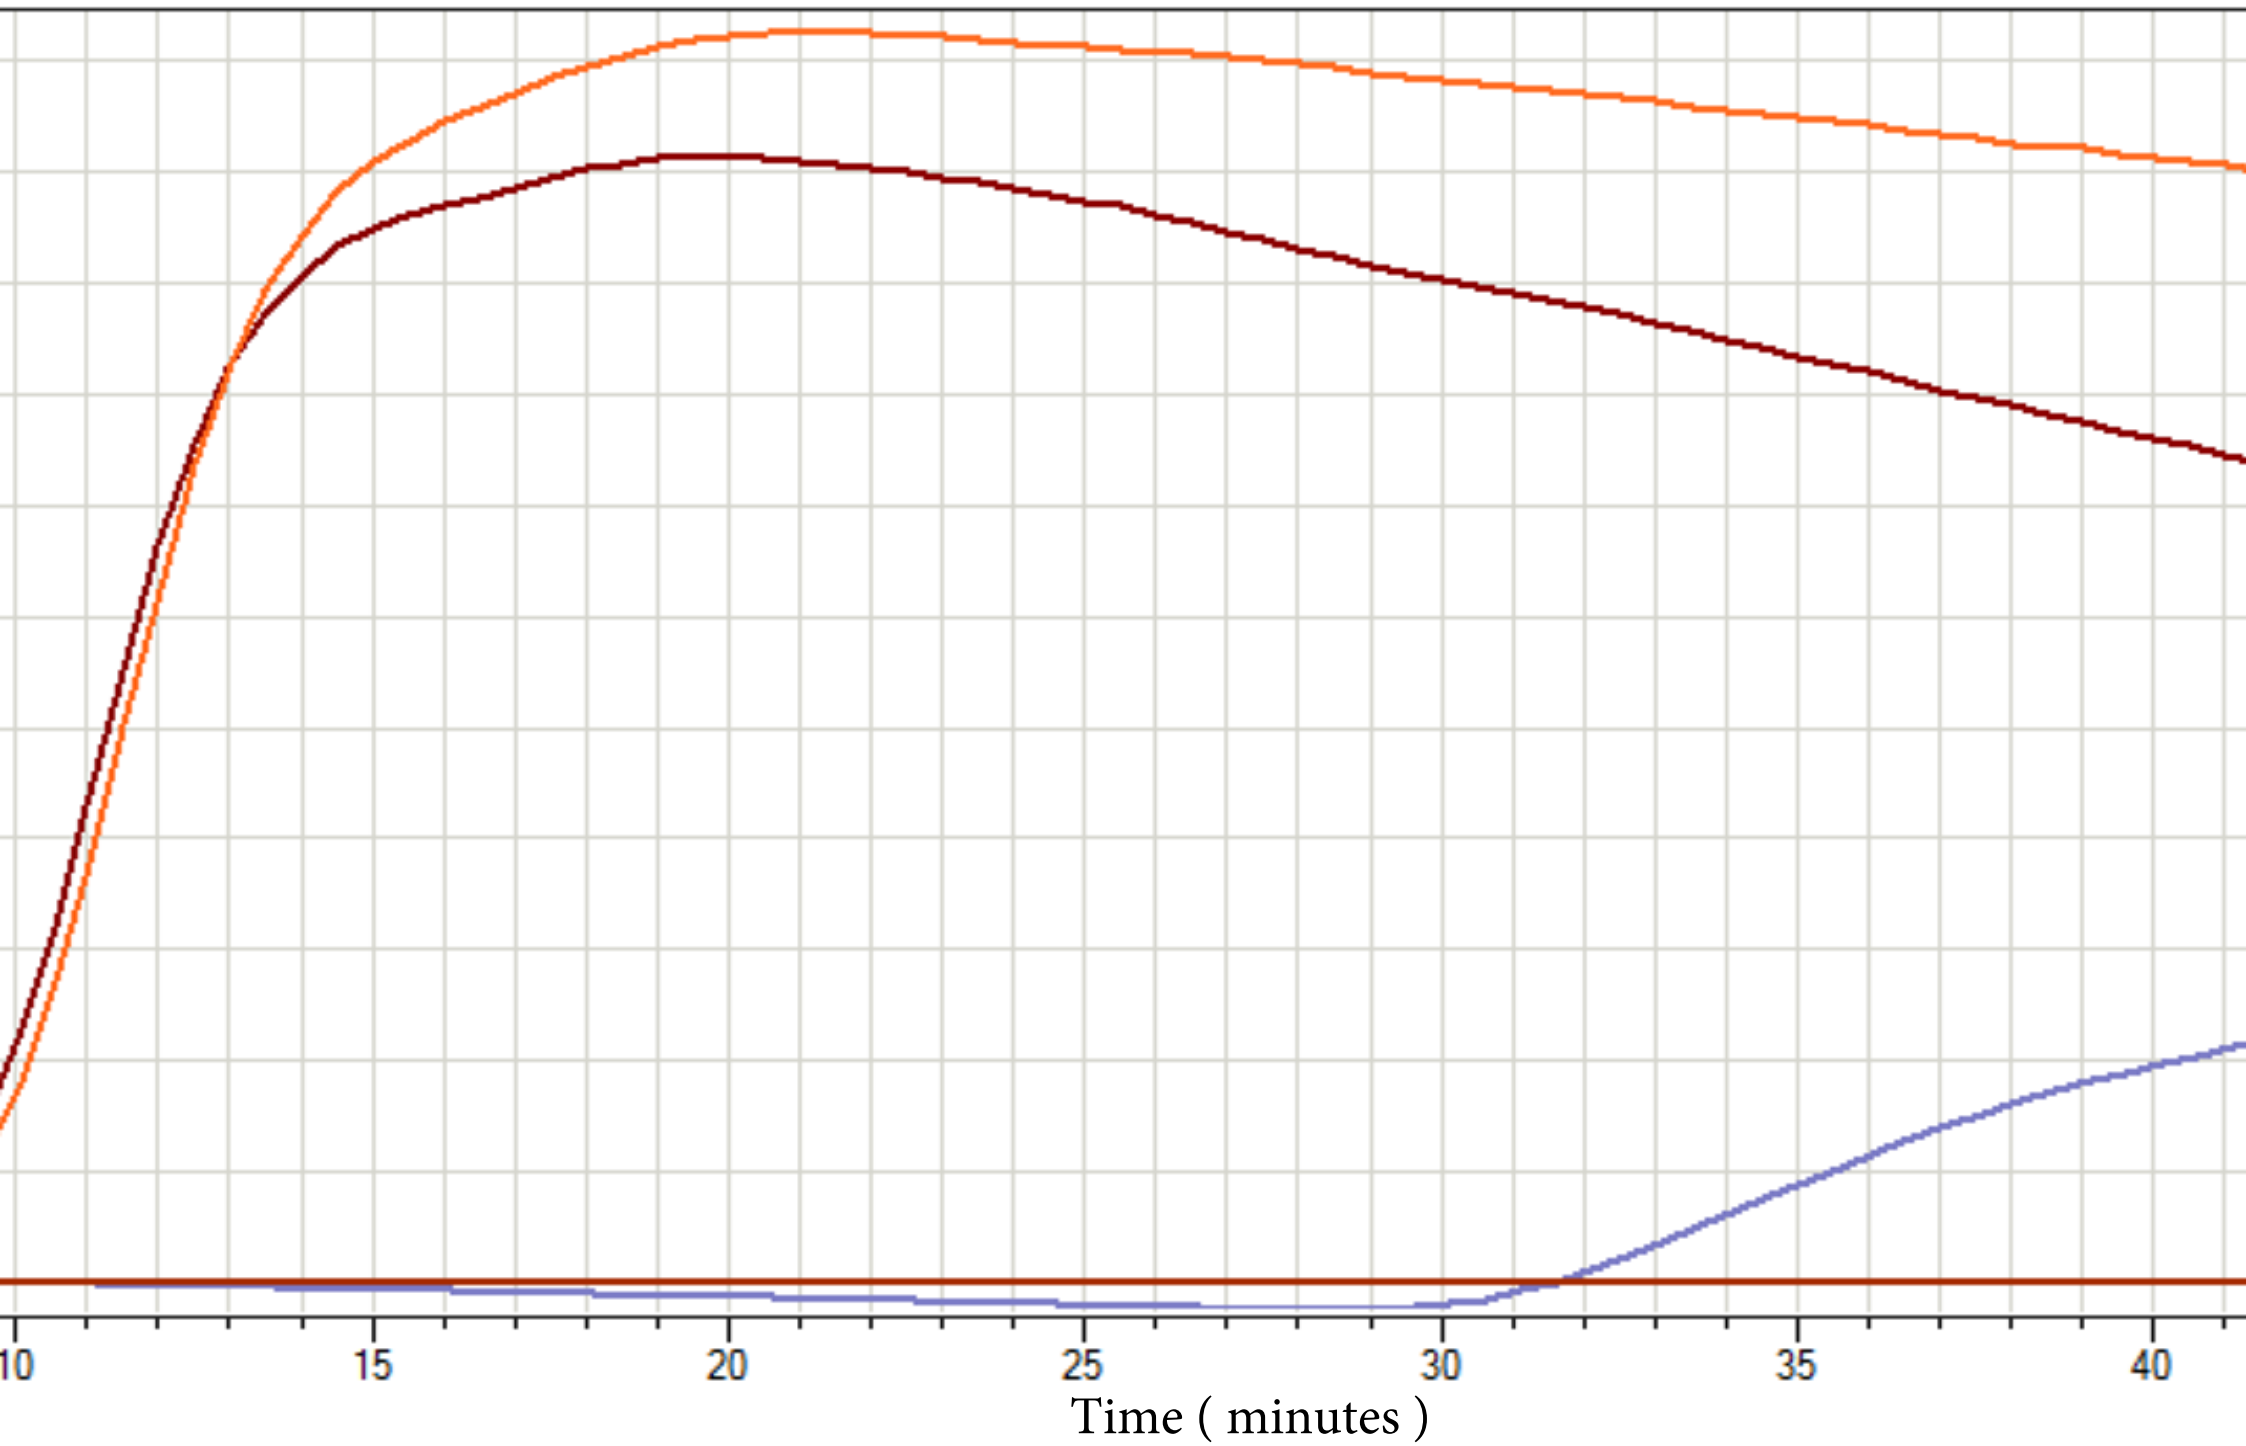

# Algorithm Processing Curve

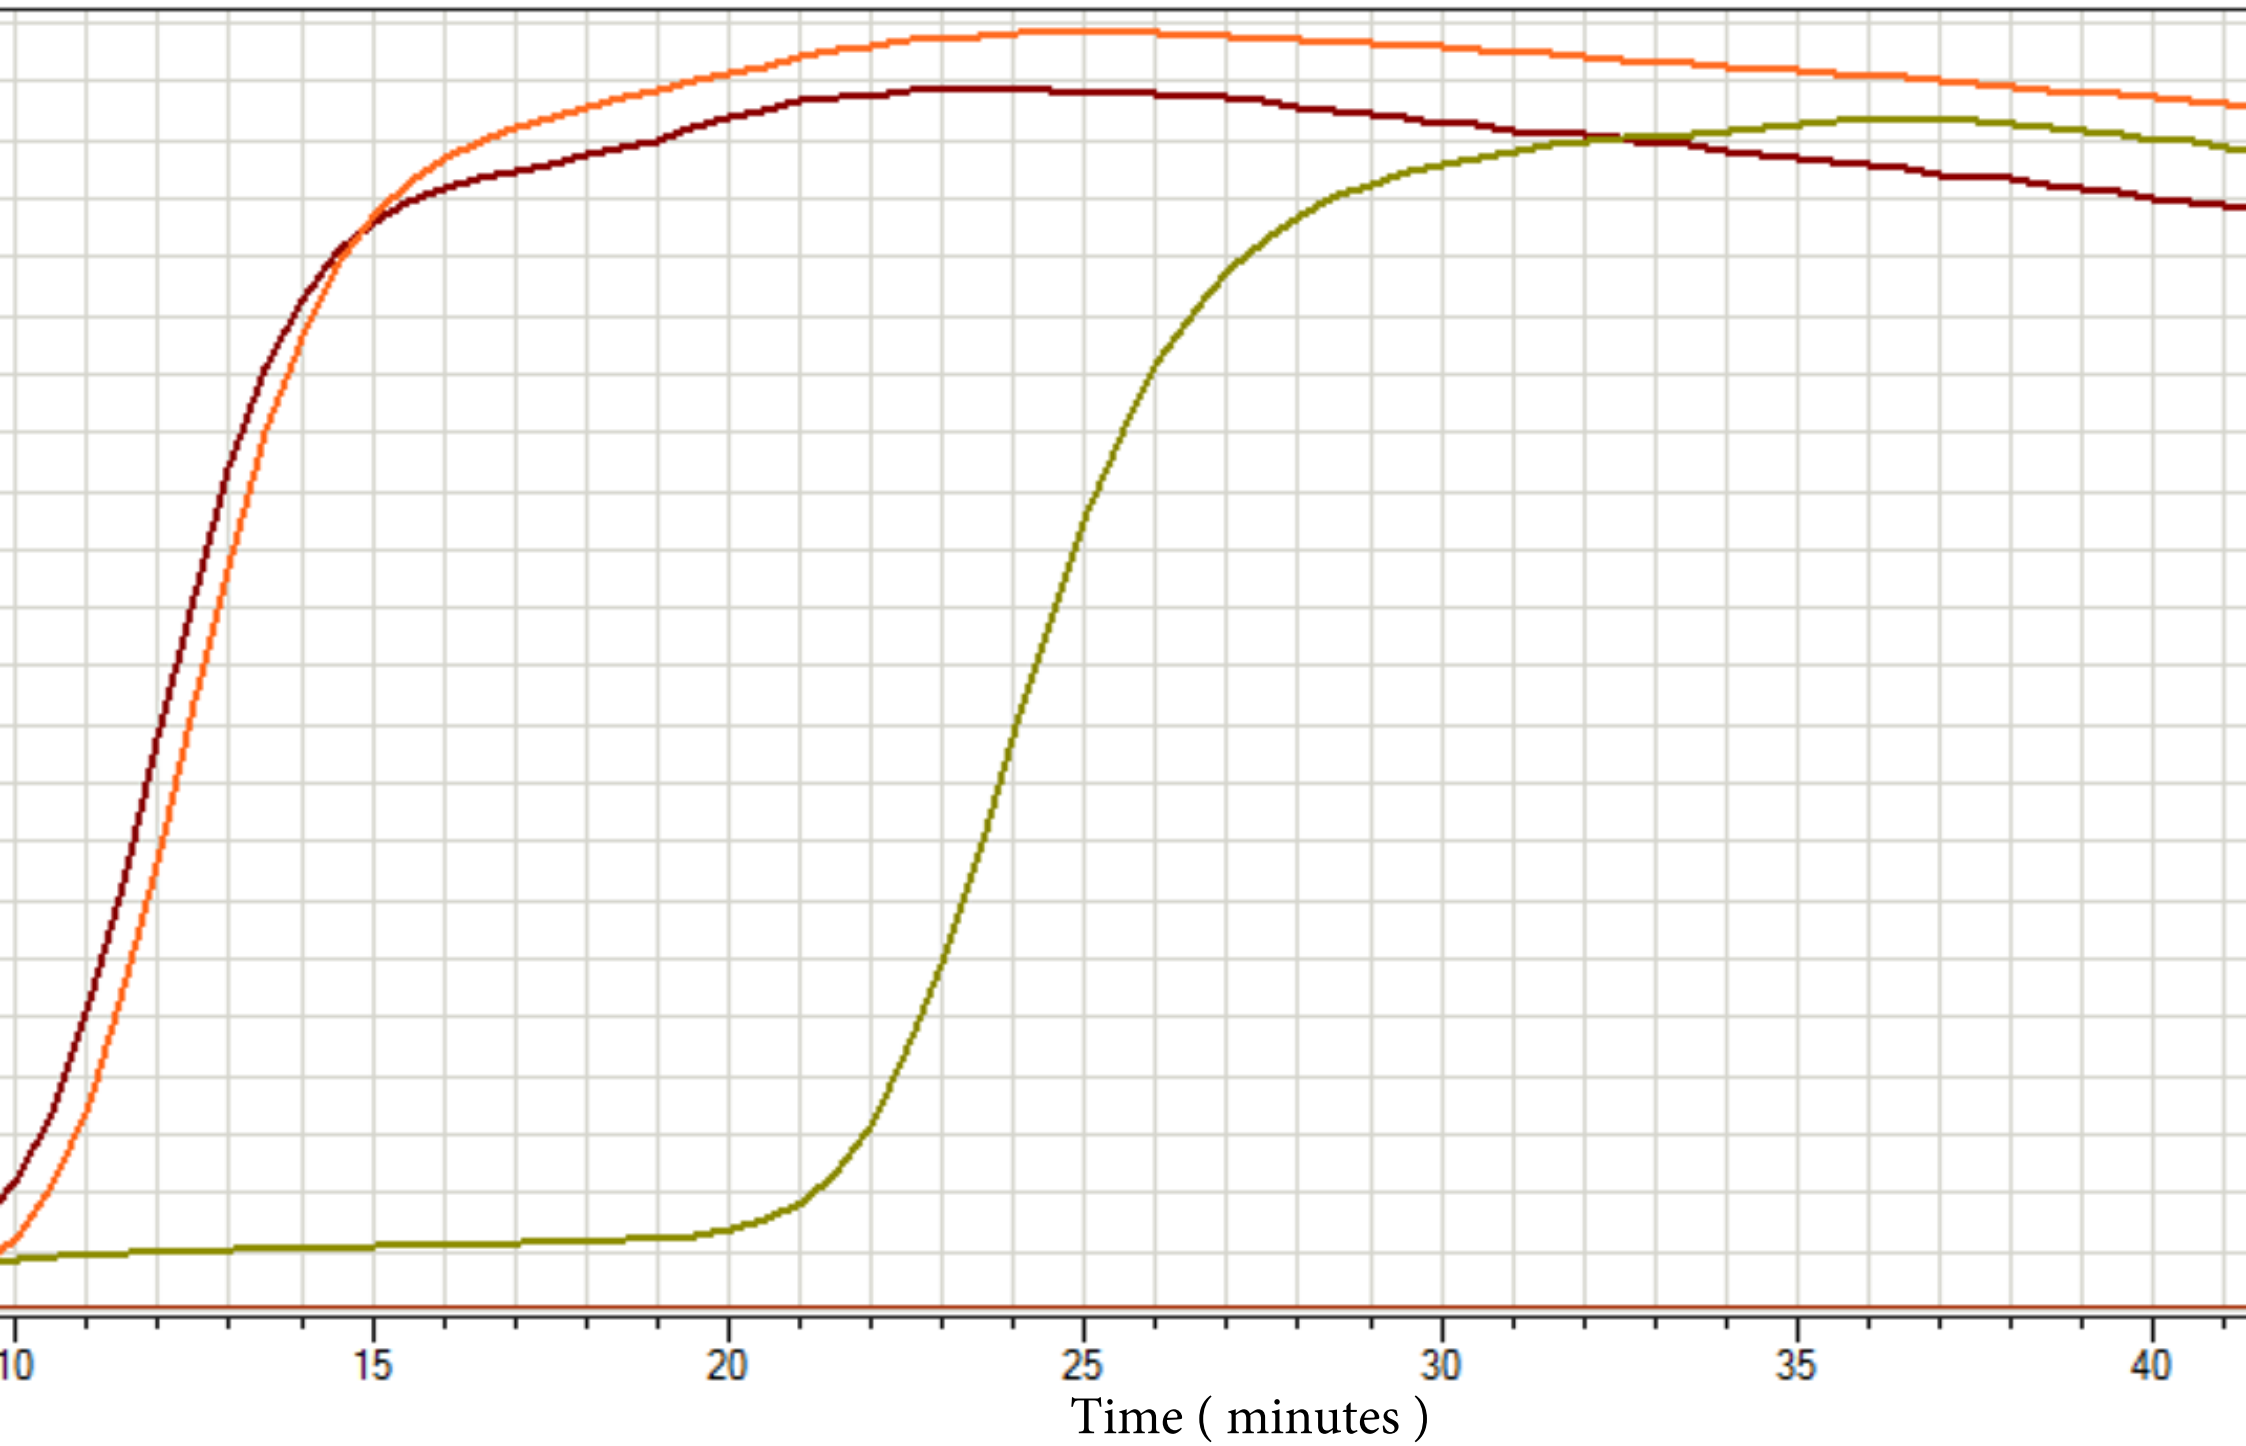

# Algorithm Processing Curve

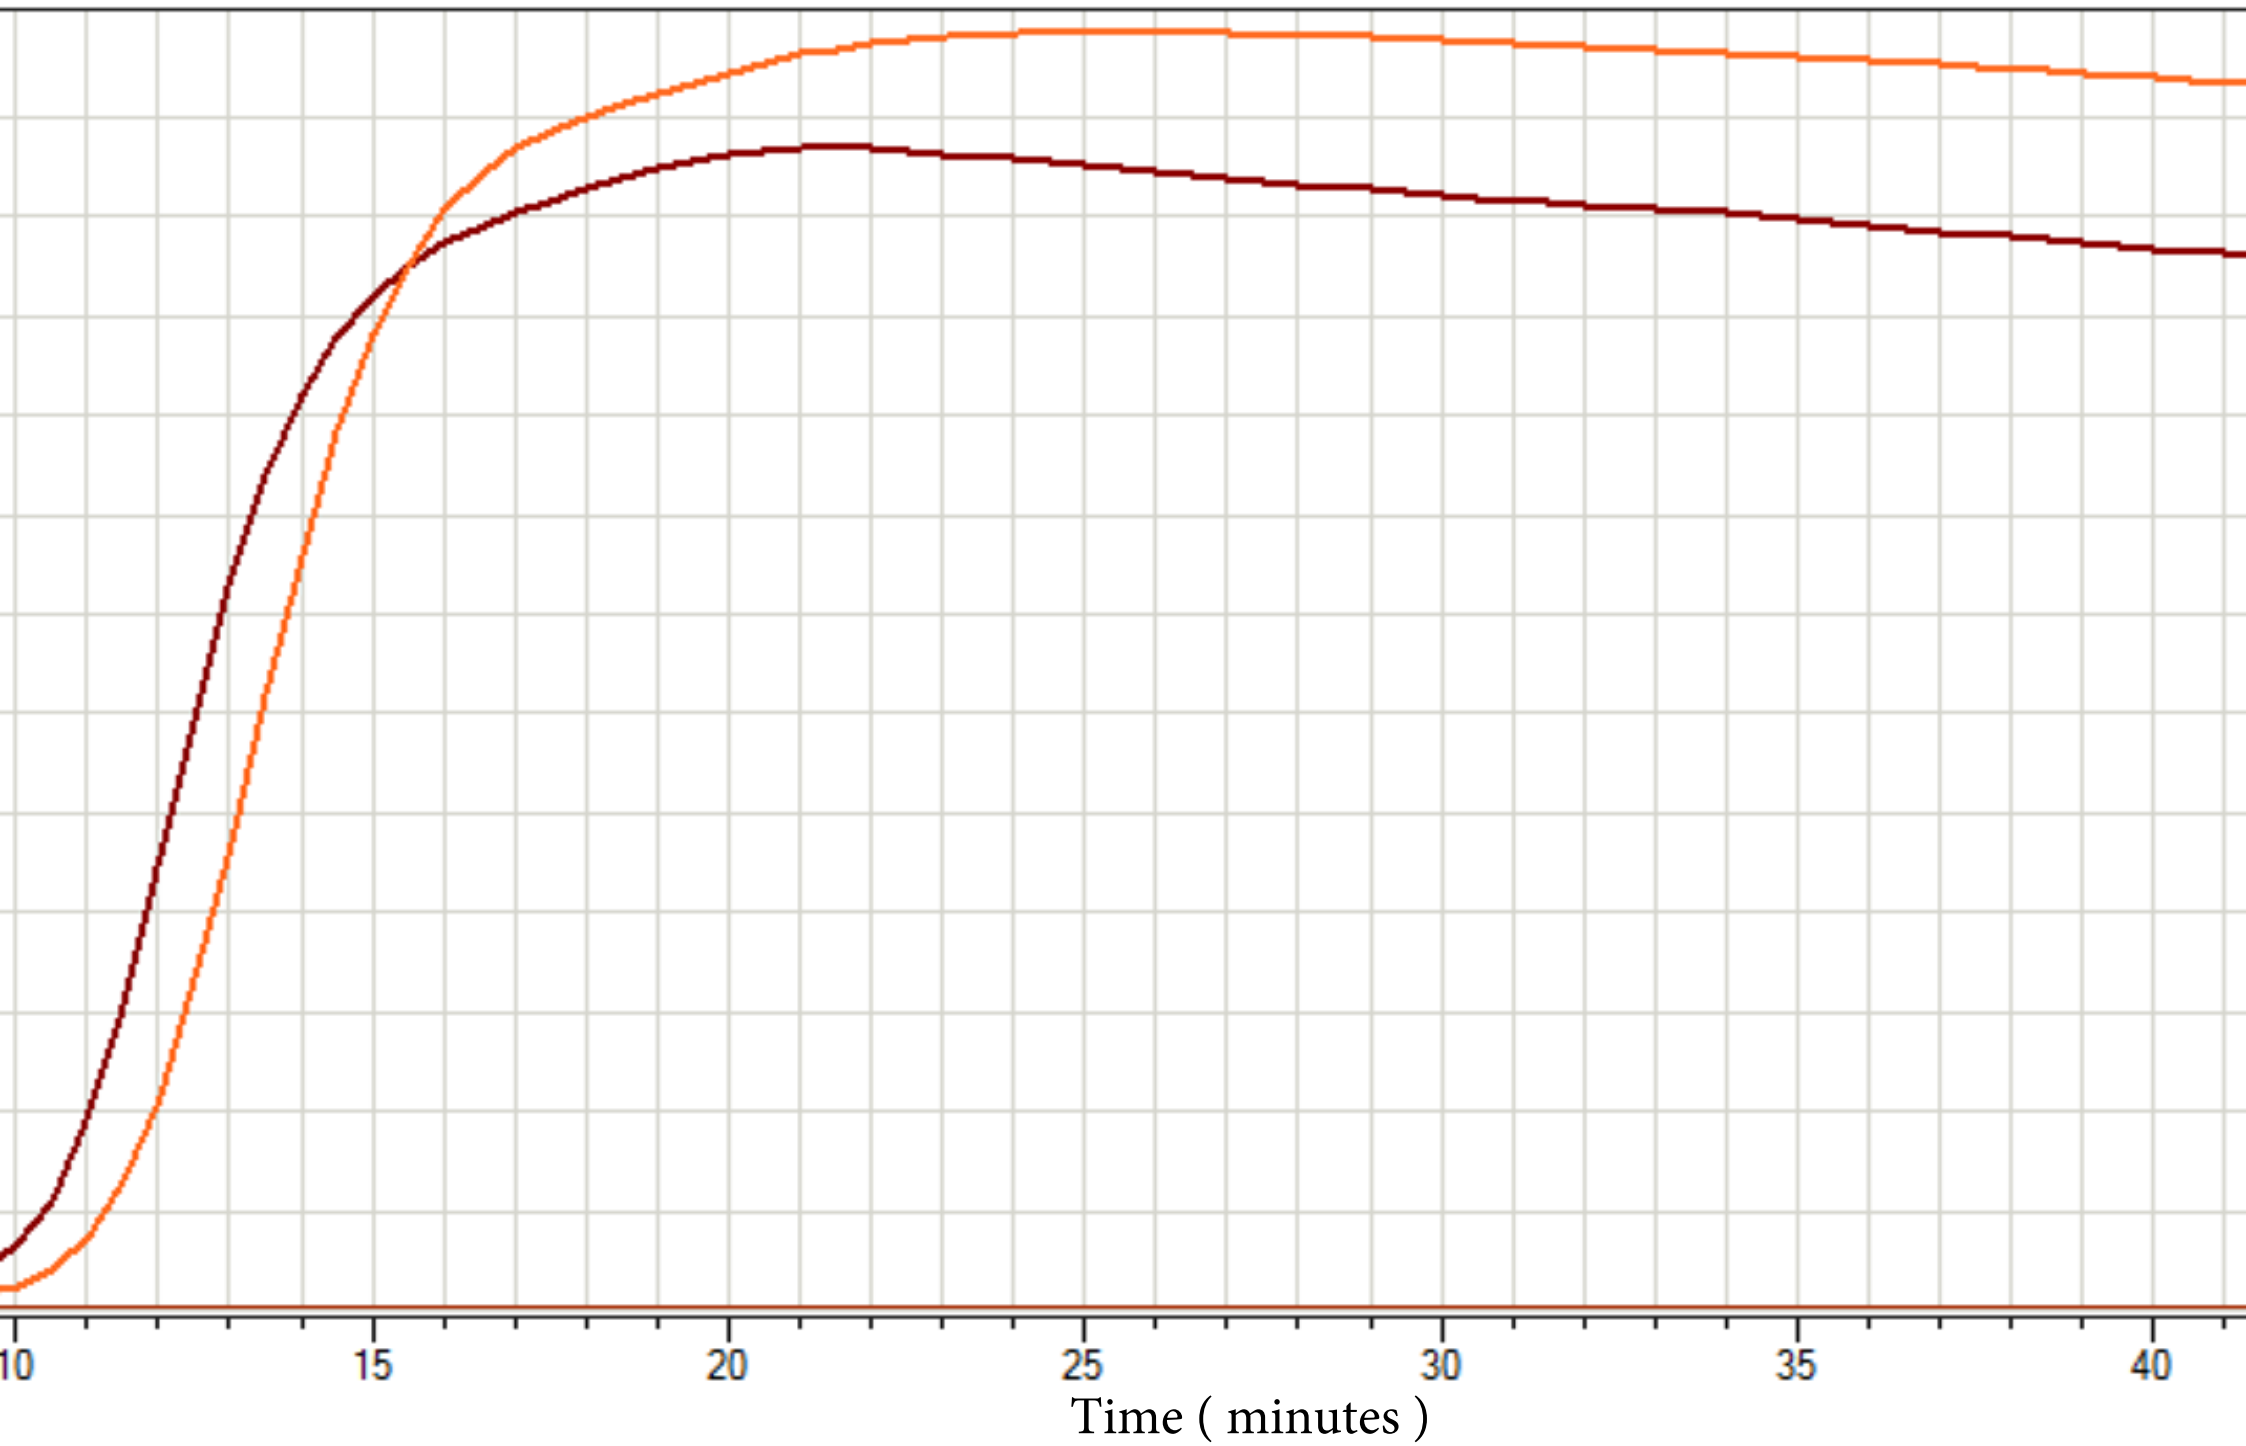

# Algorithm Processing Curve

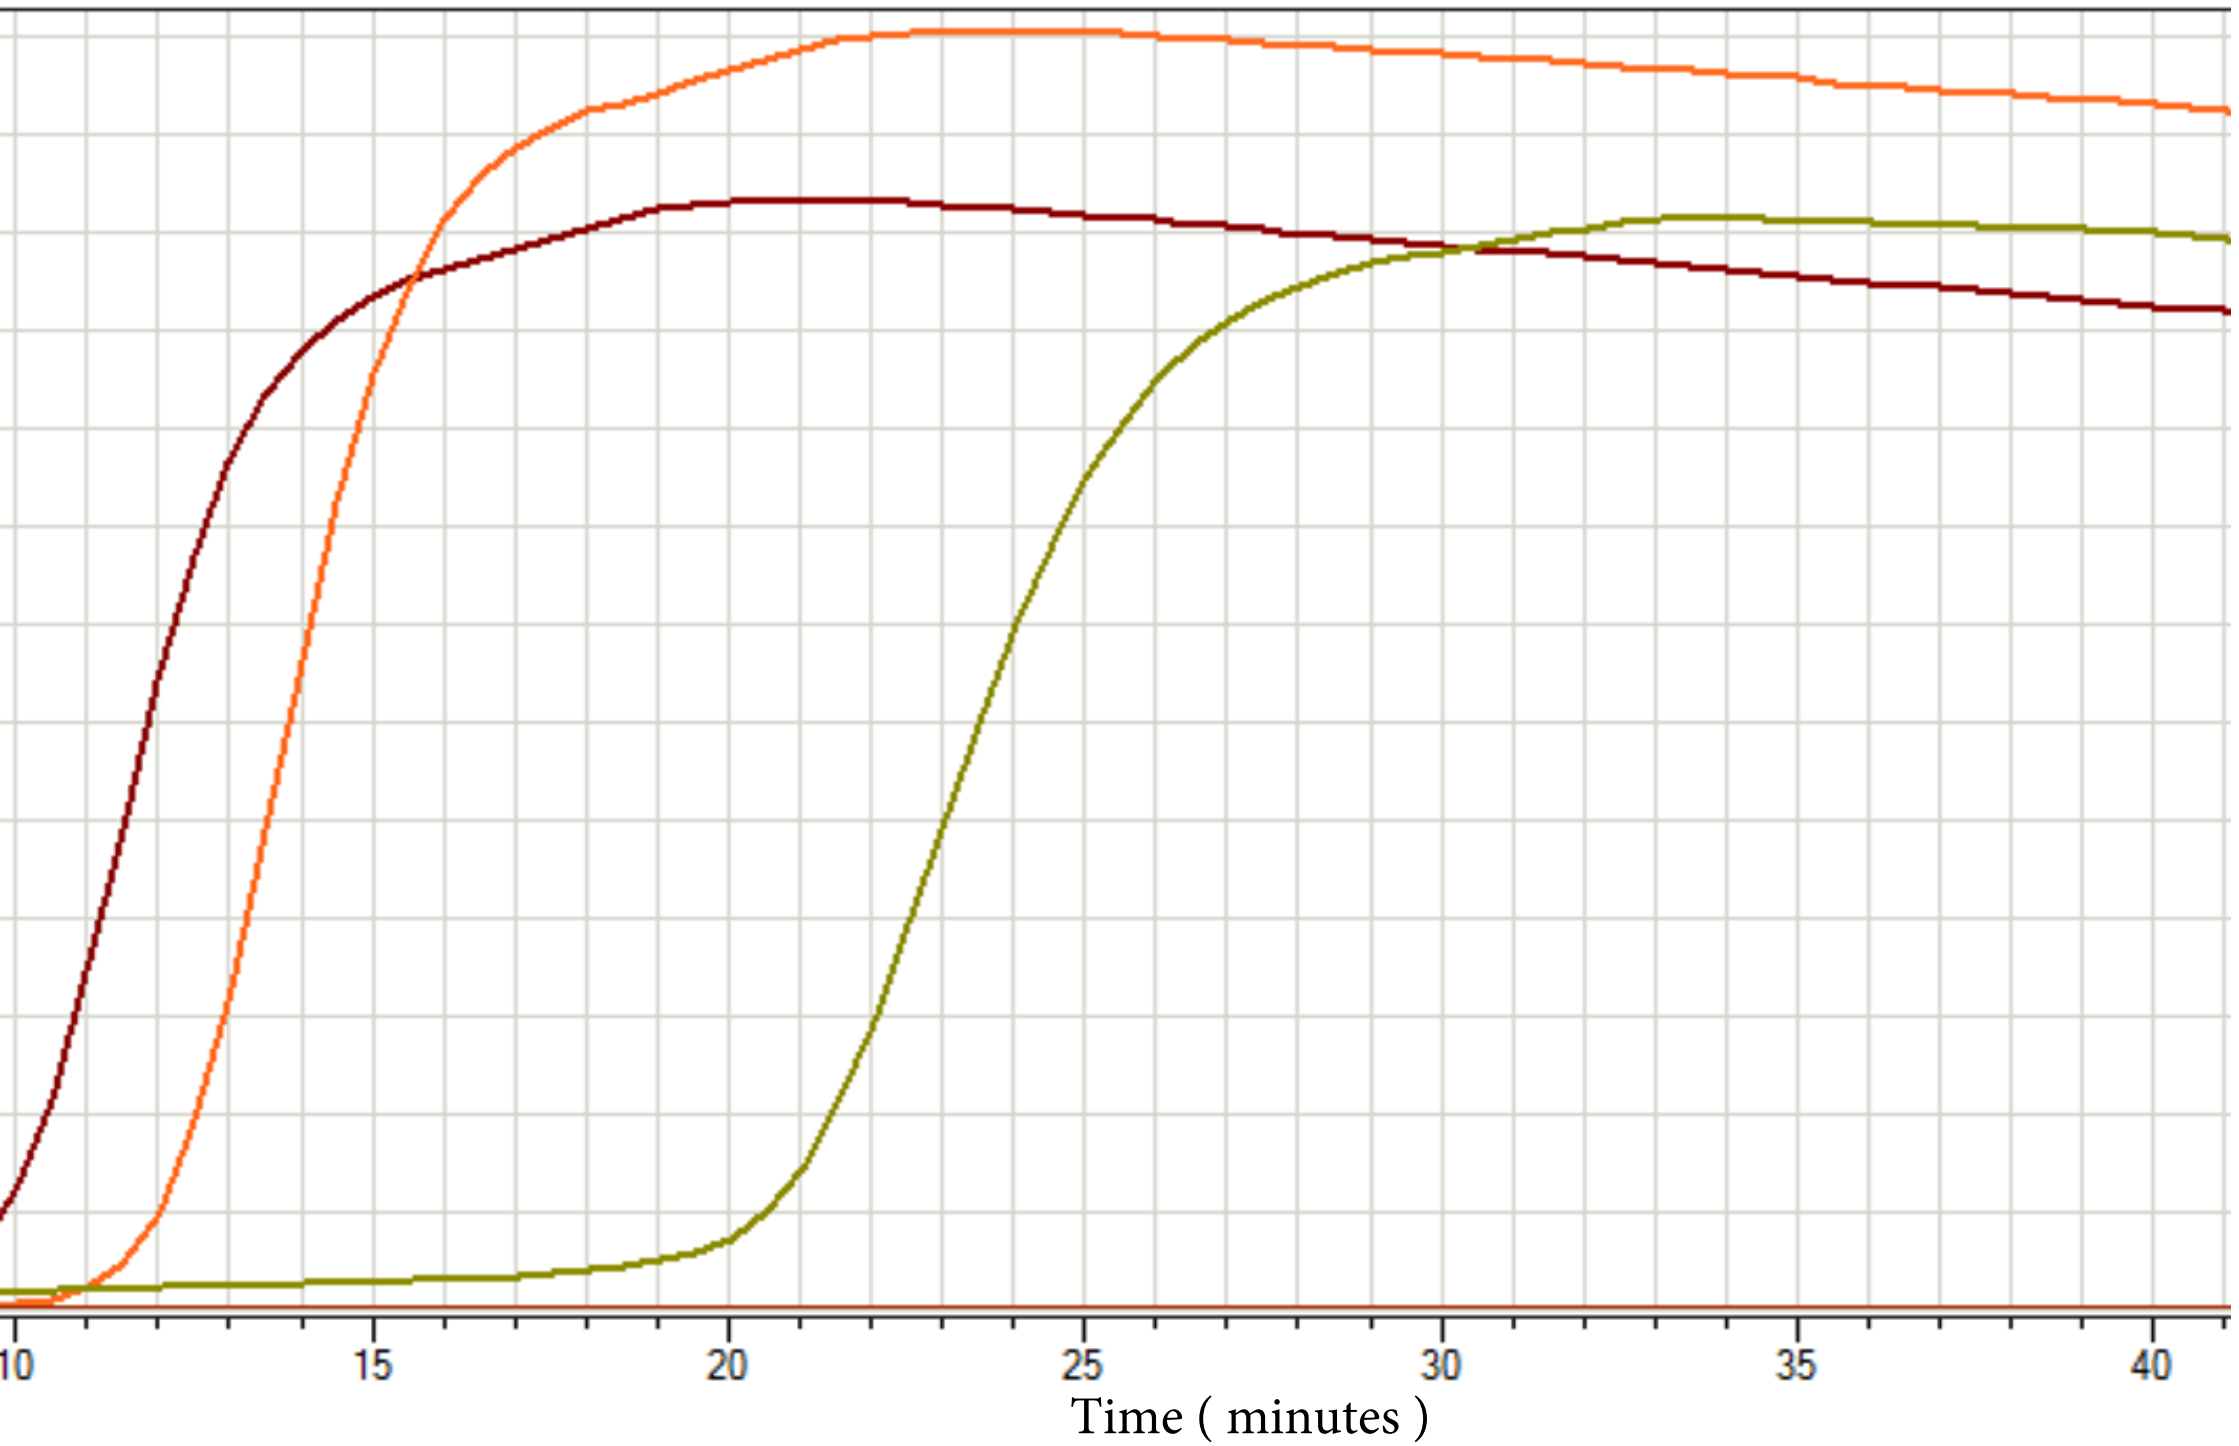

# Algorithm Processing Curve

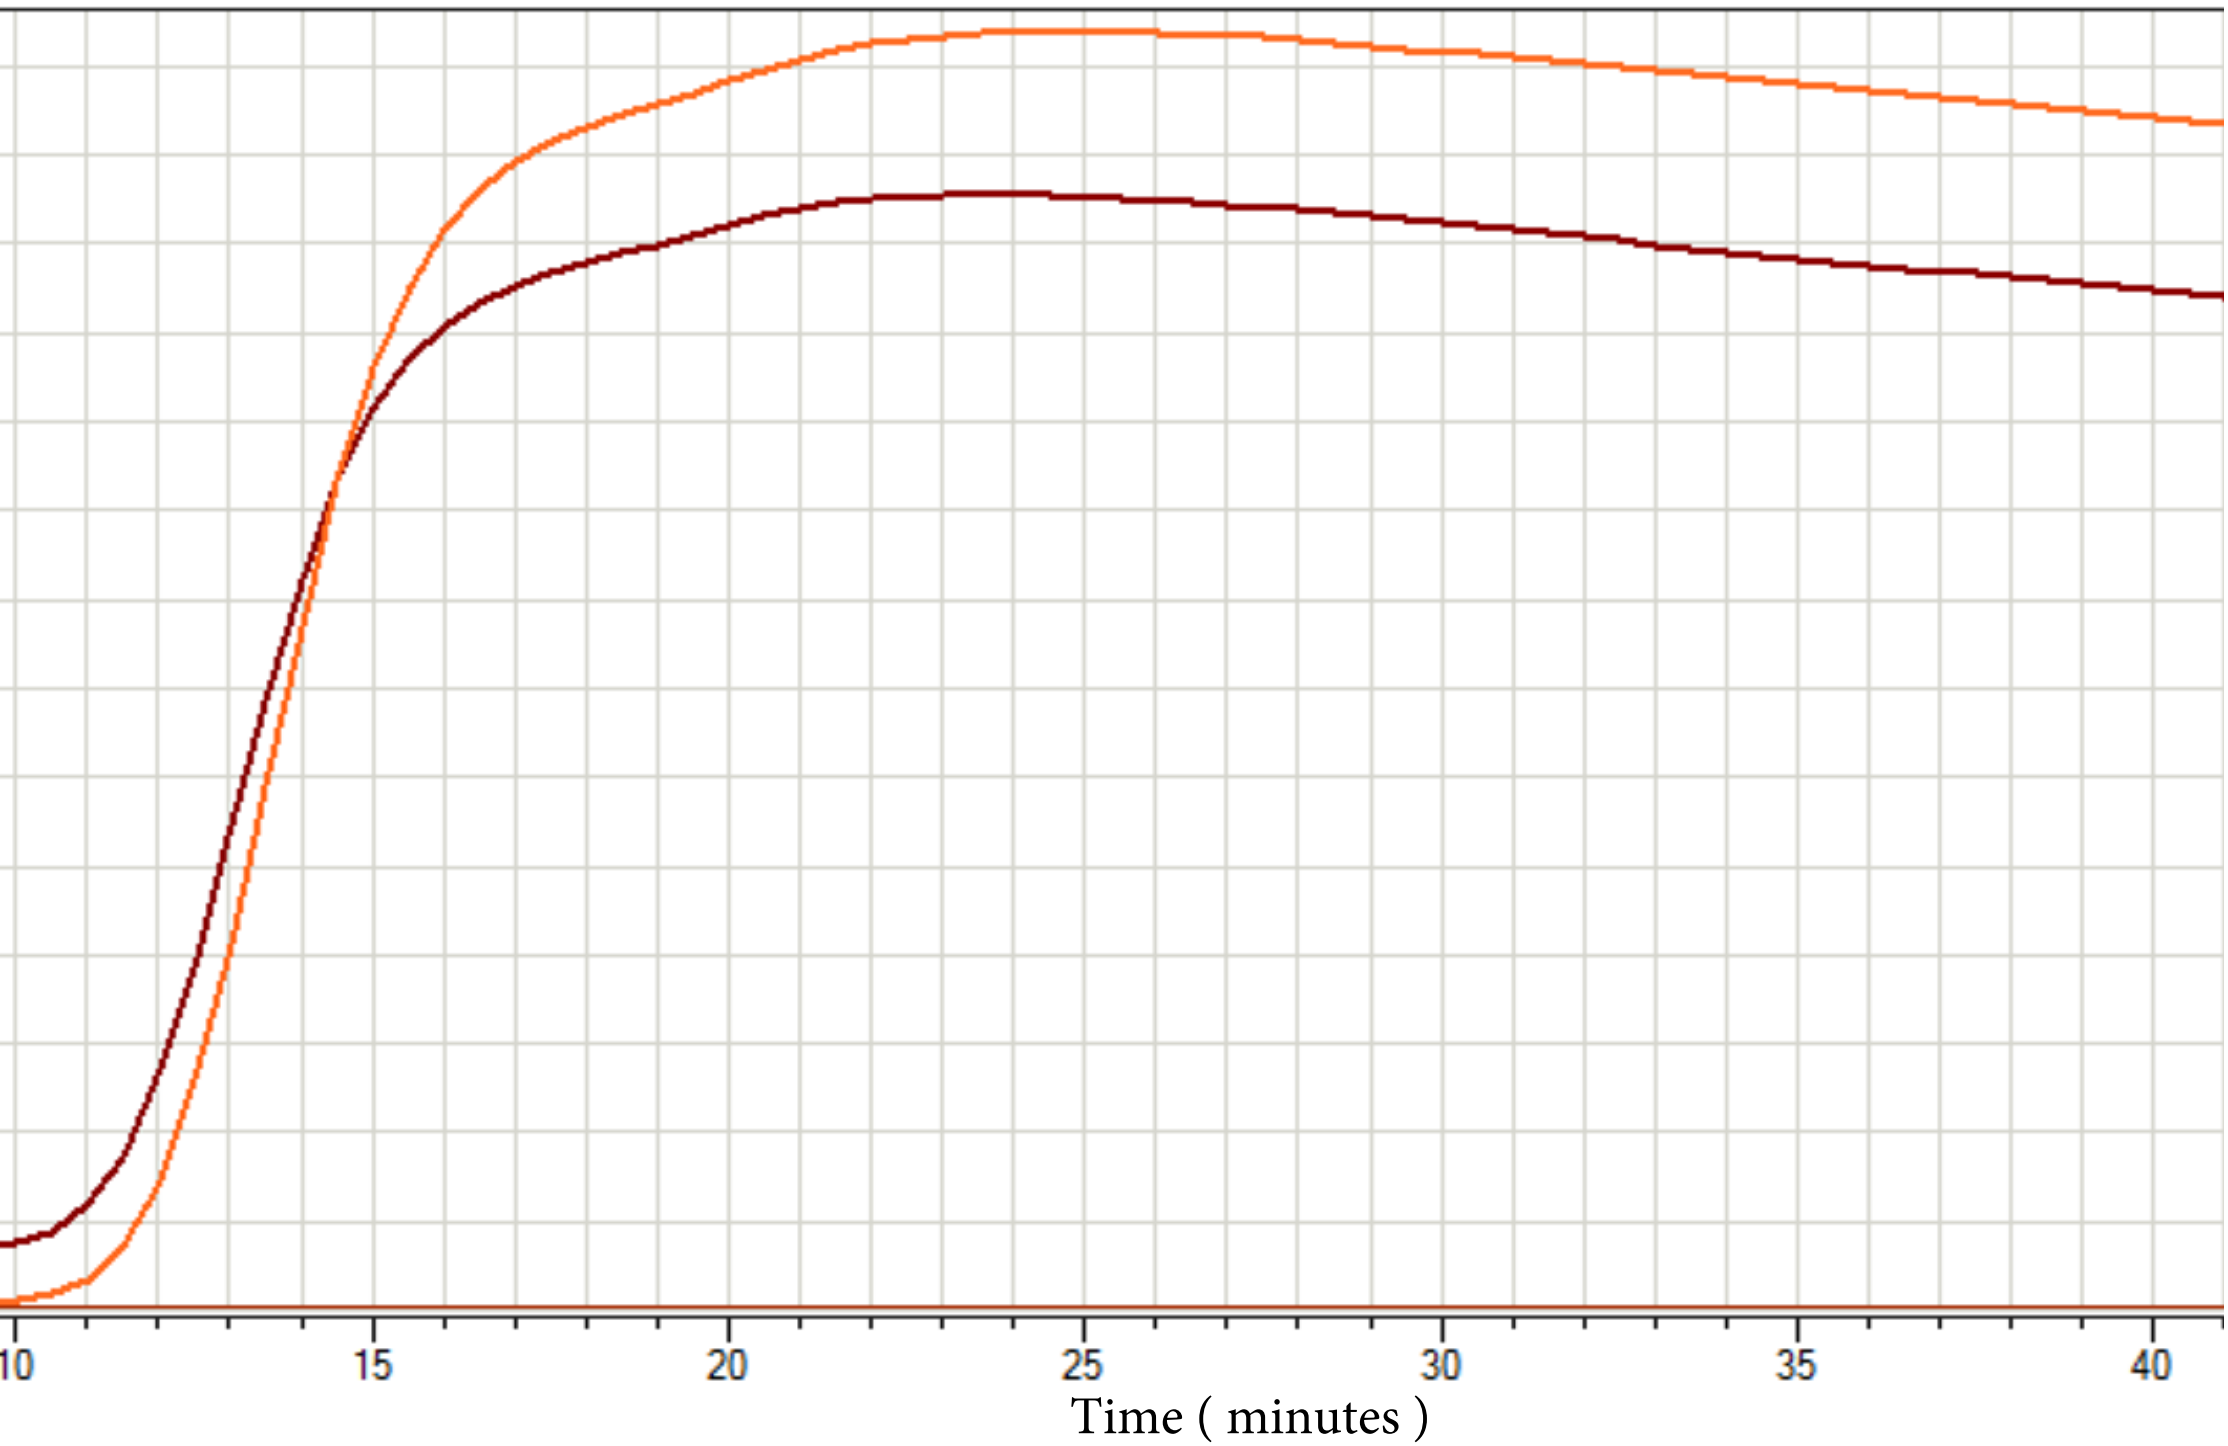

# Algorithm Processing Curve

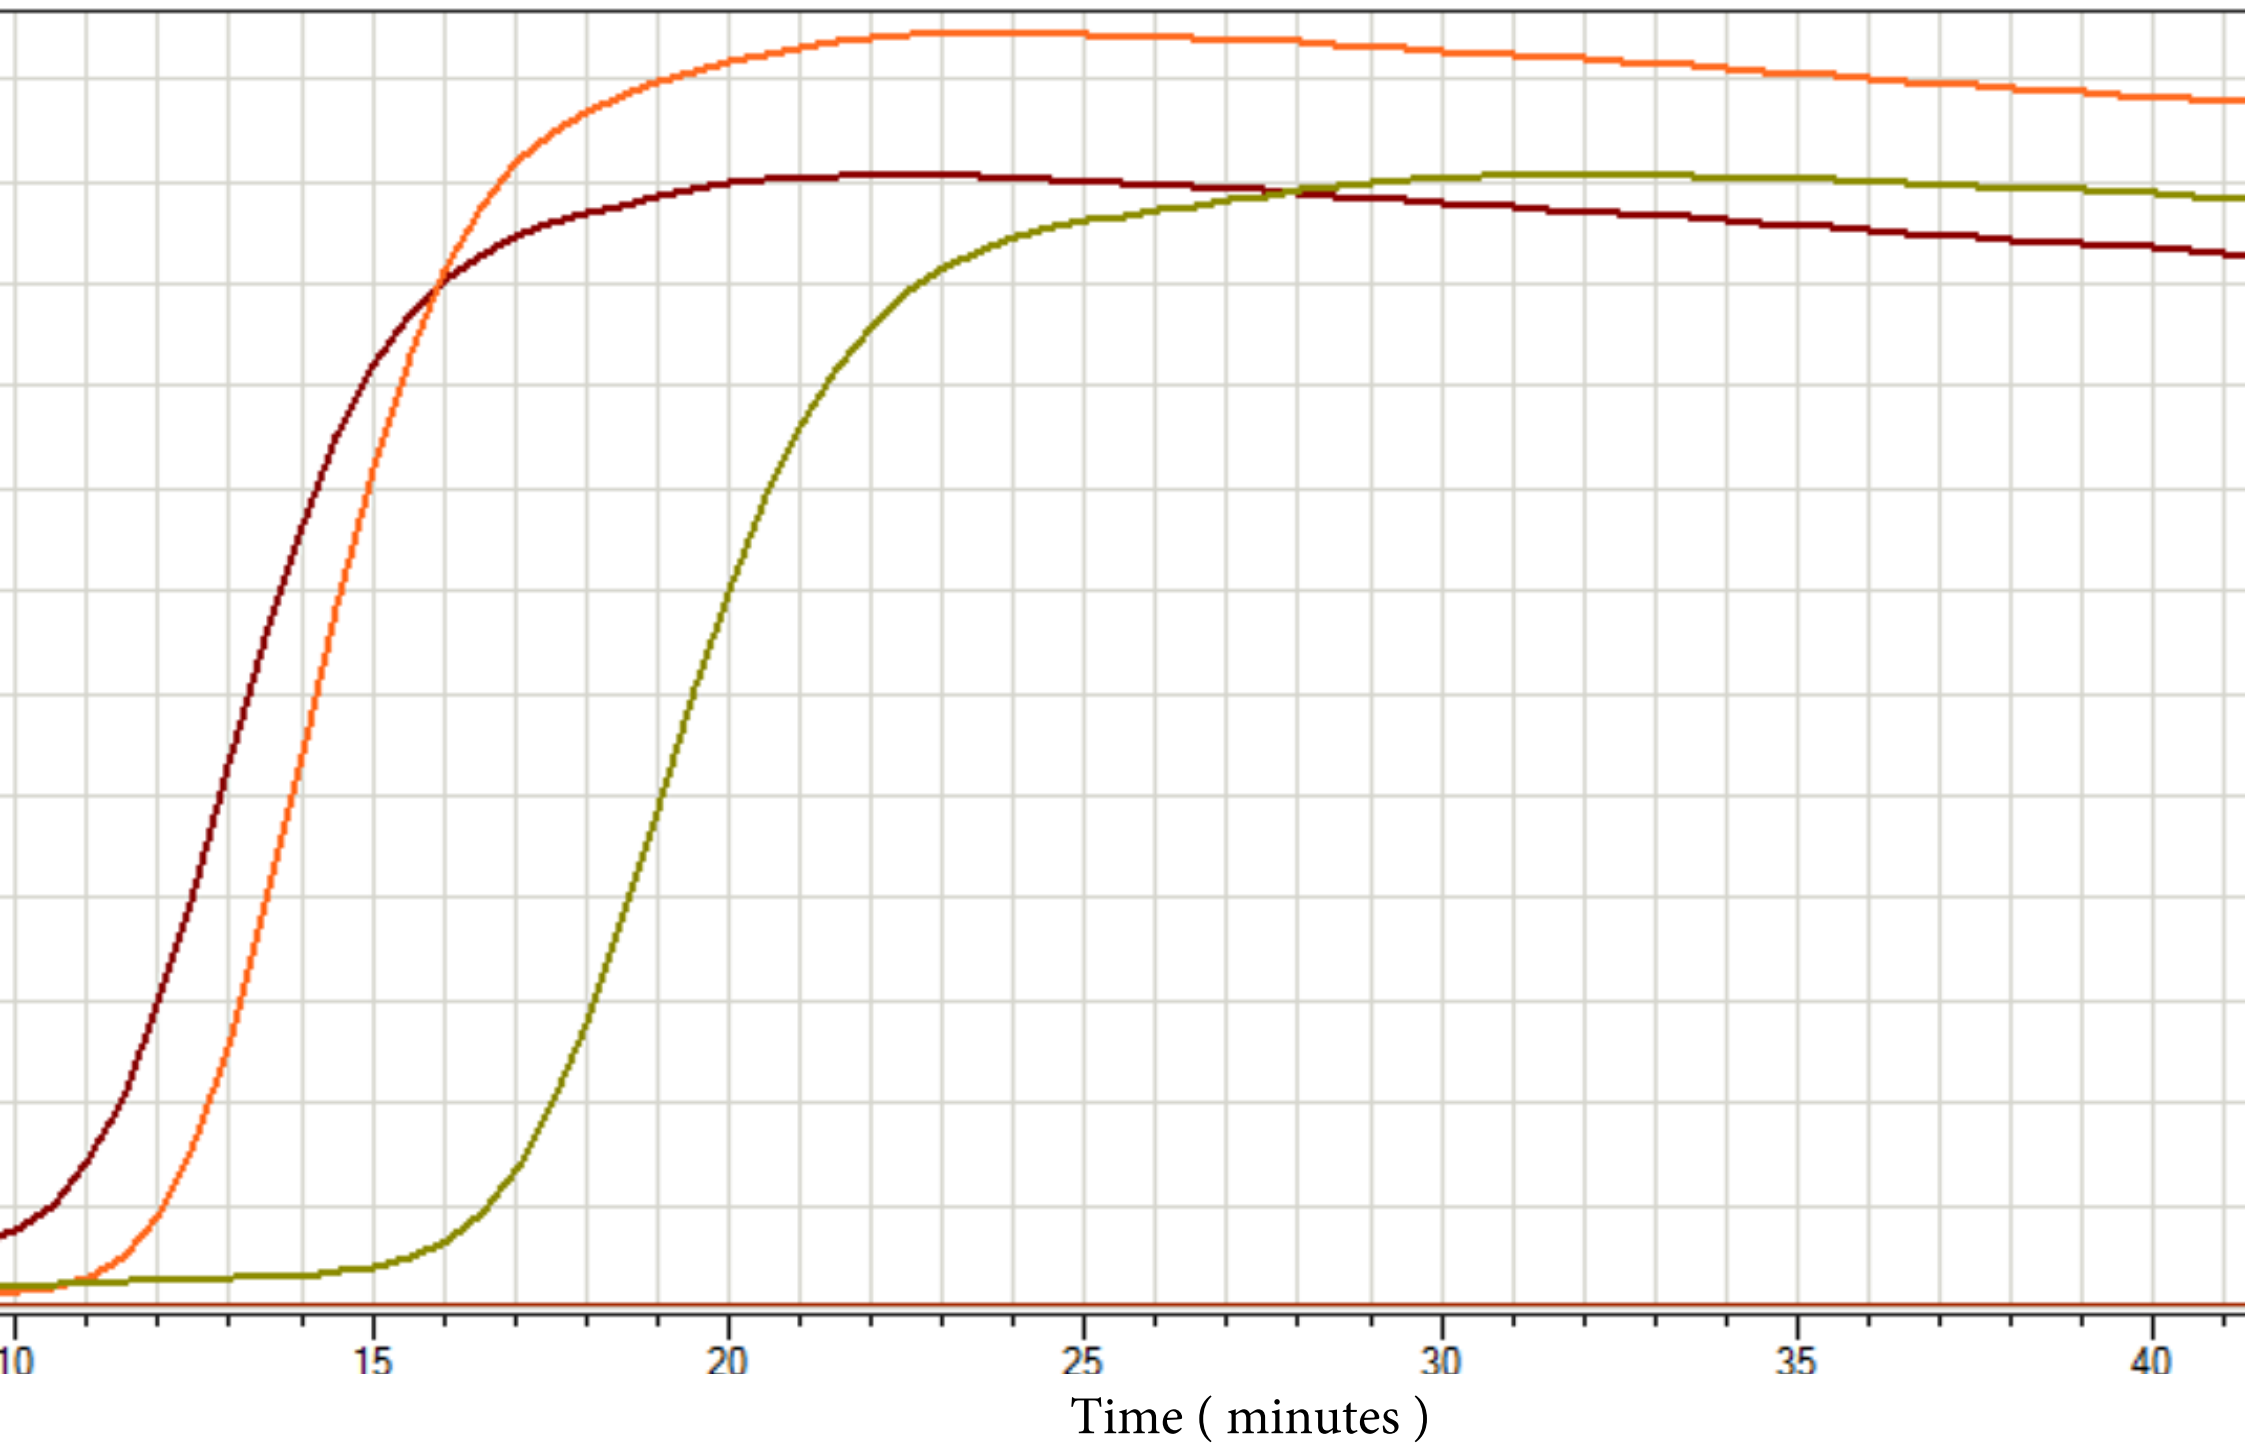



# Algorithm Processing Curve

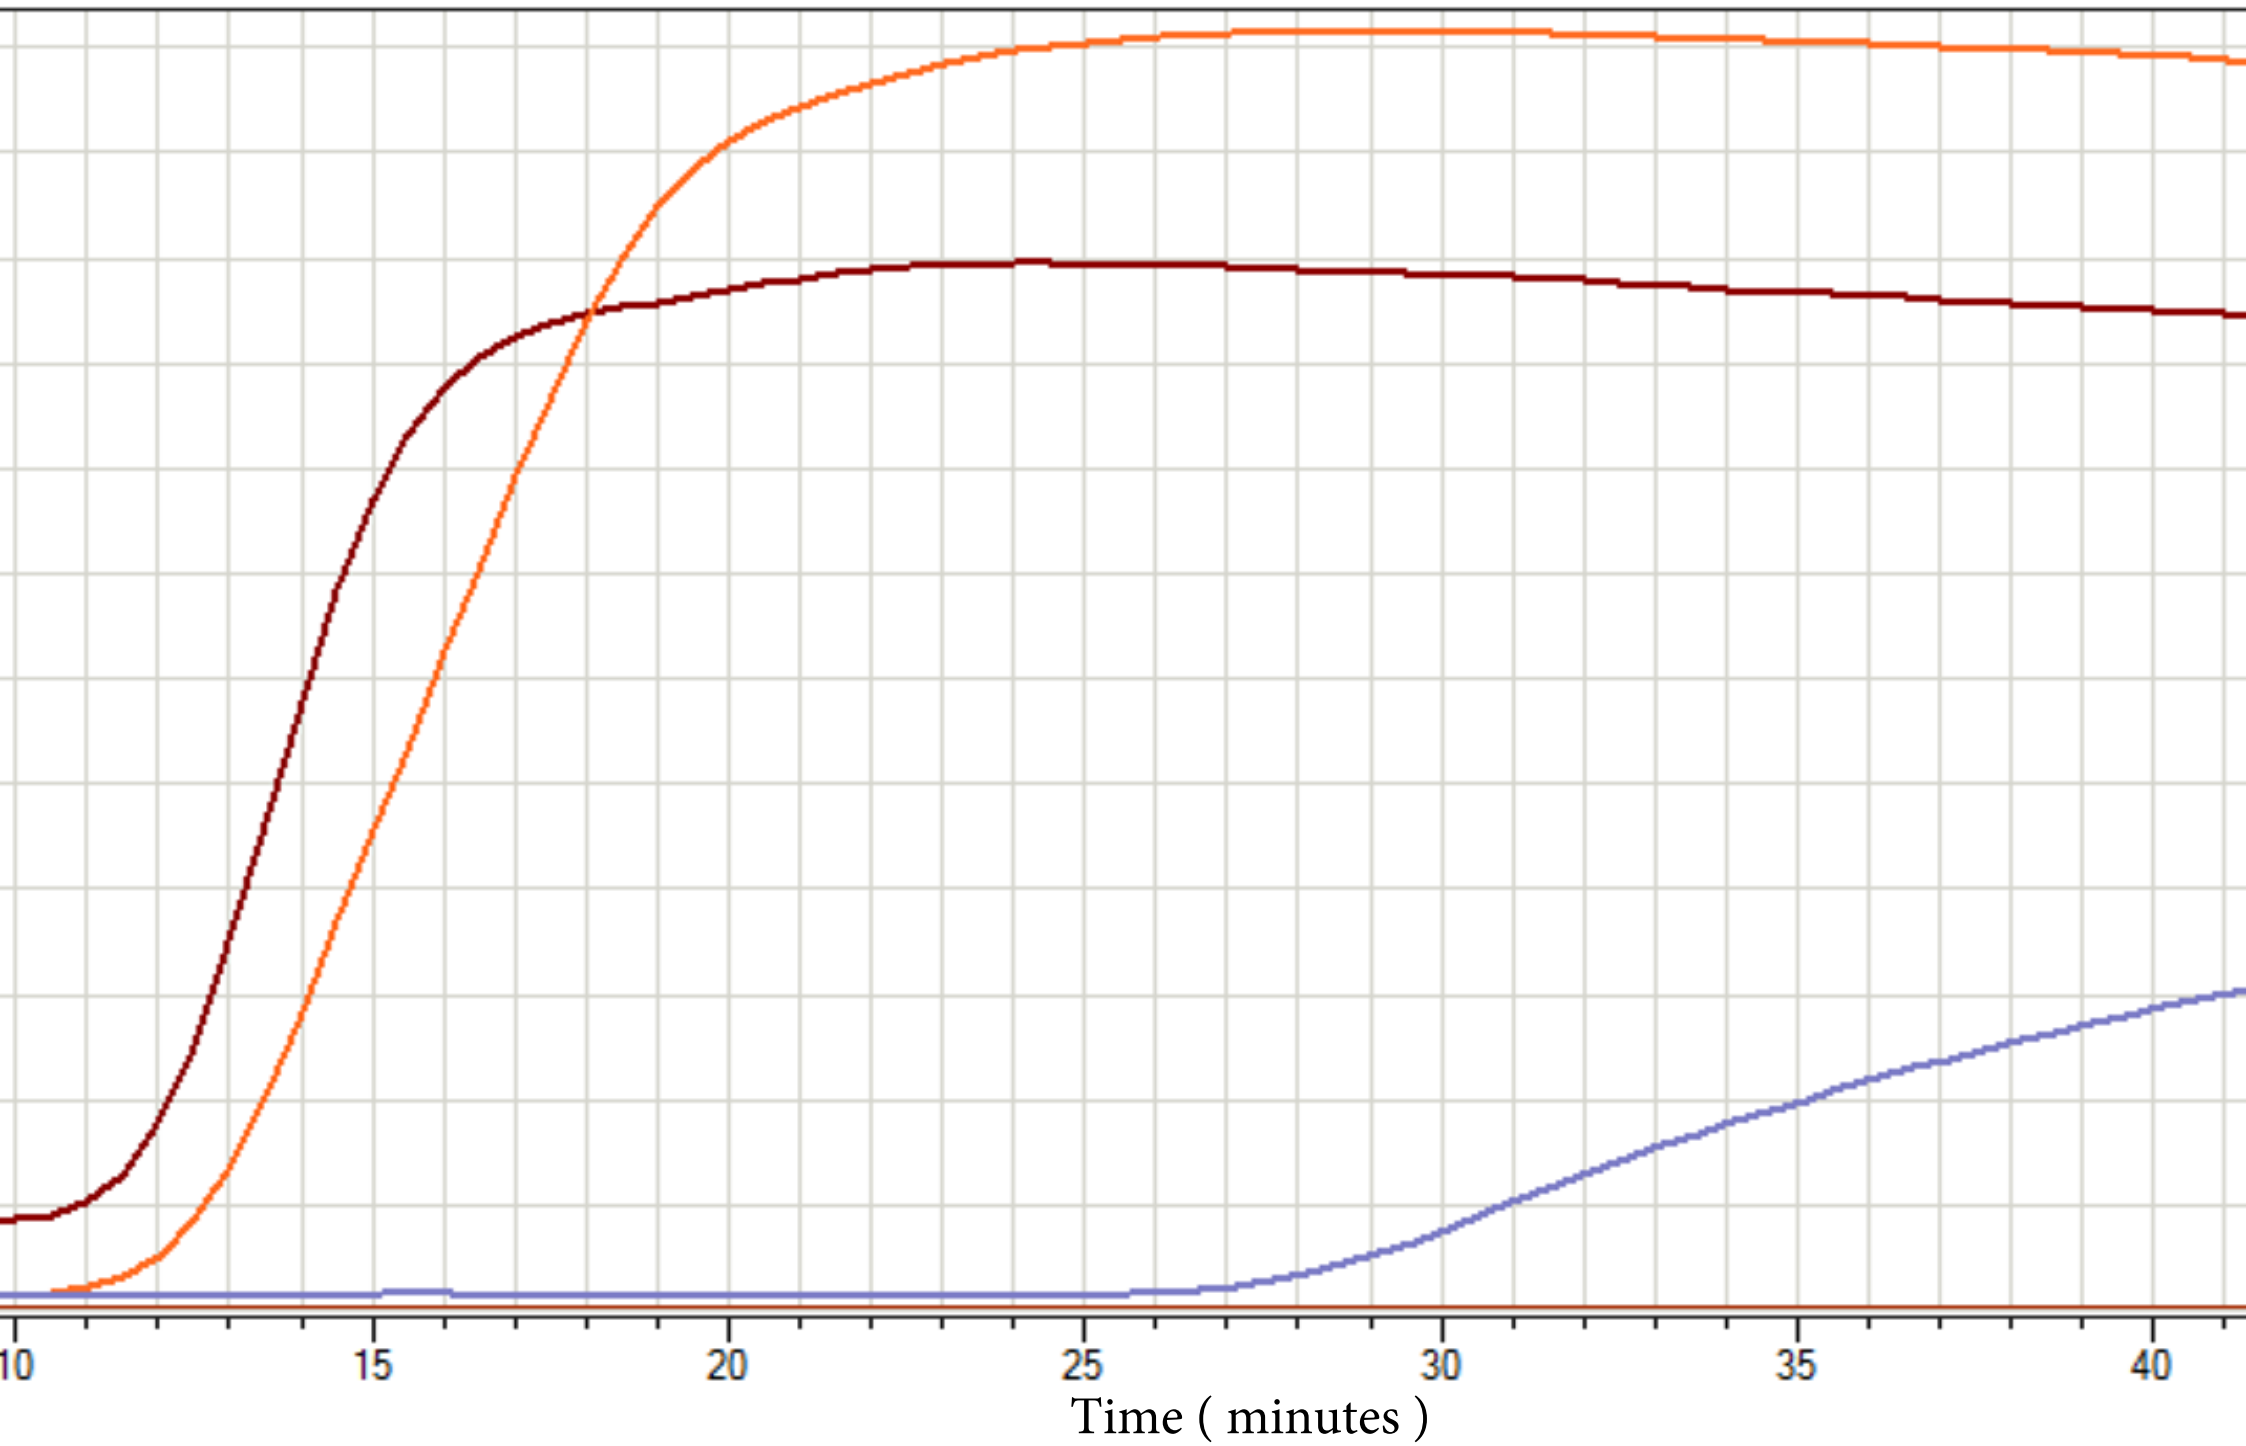



# Algorithm Processing Curve

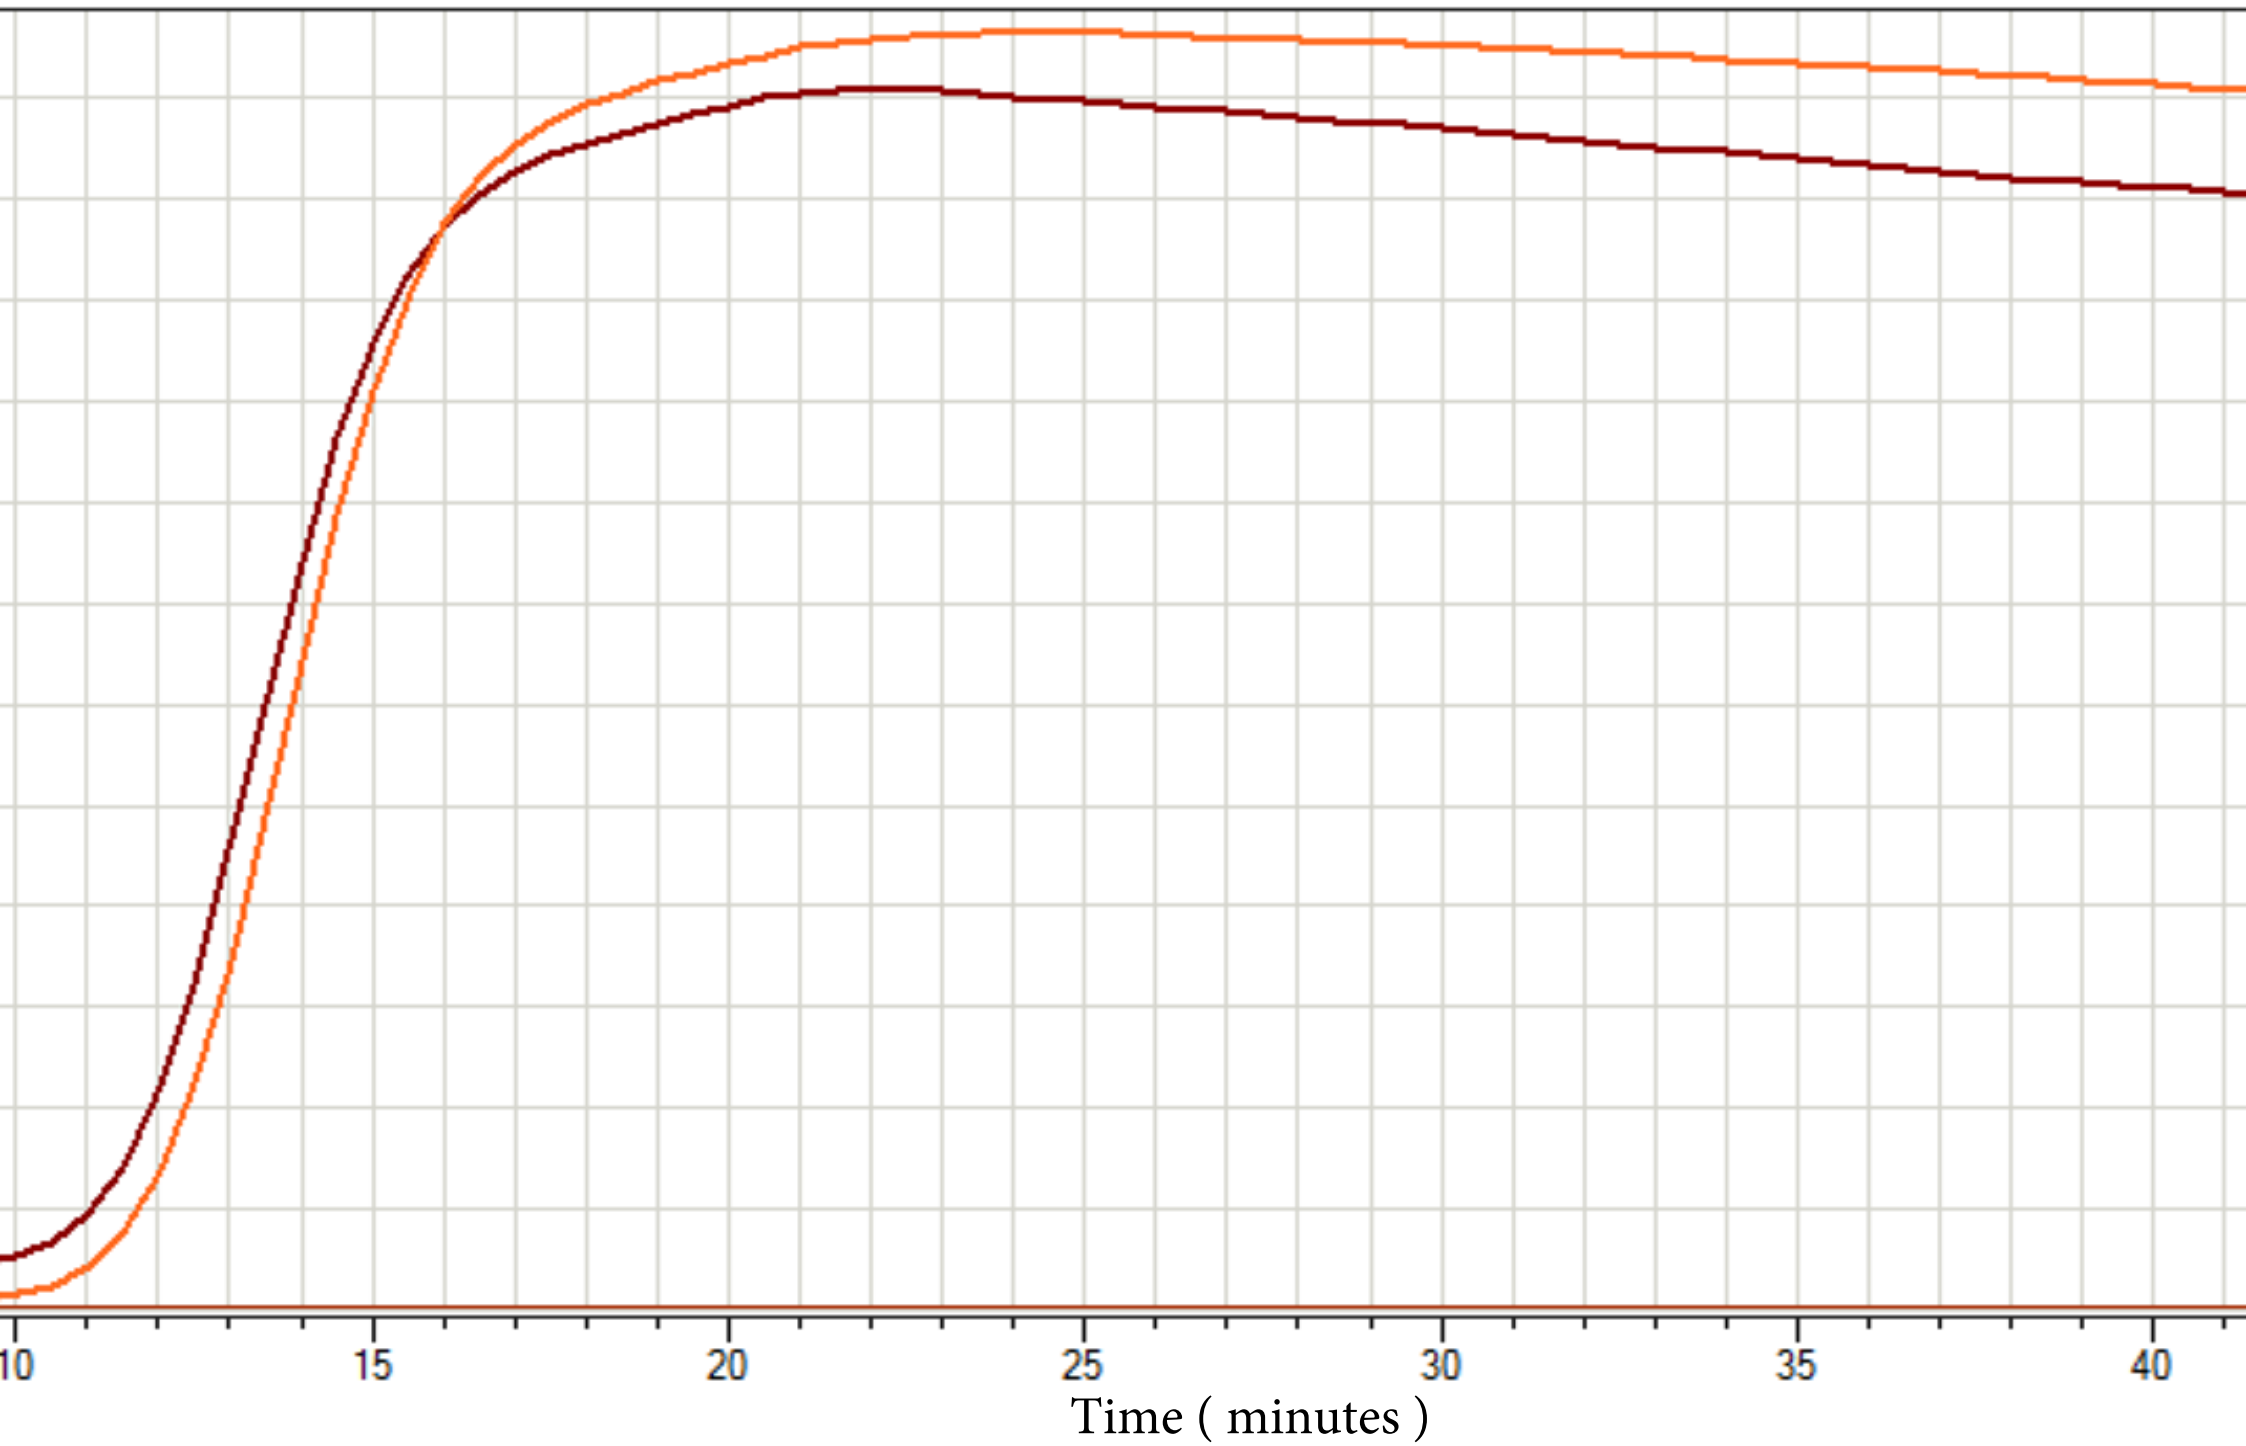

# Algorithm Processing Curve

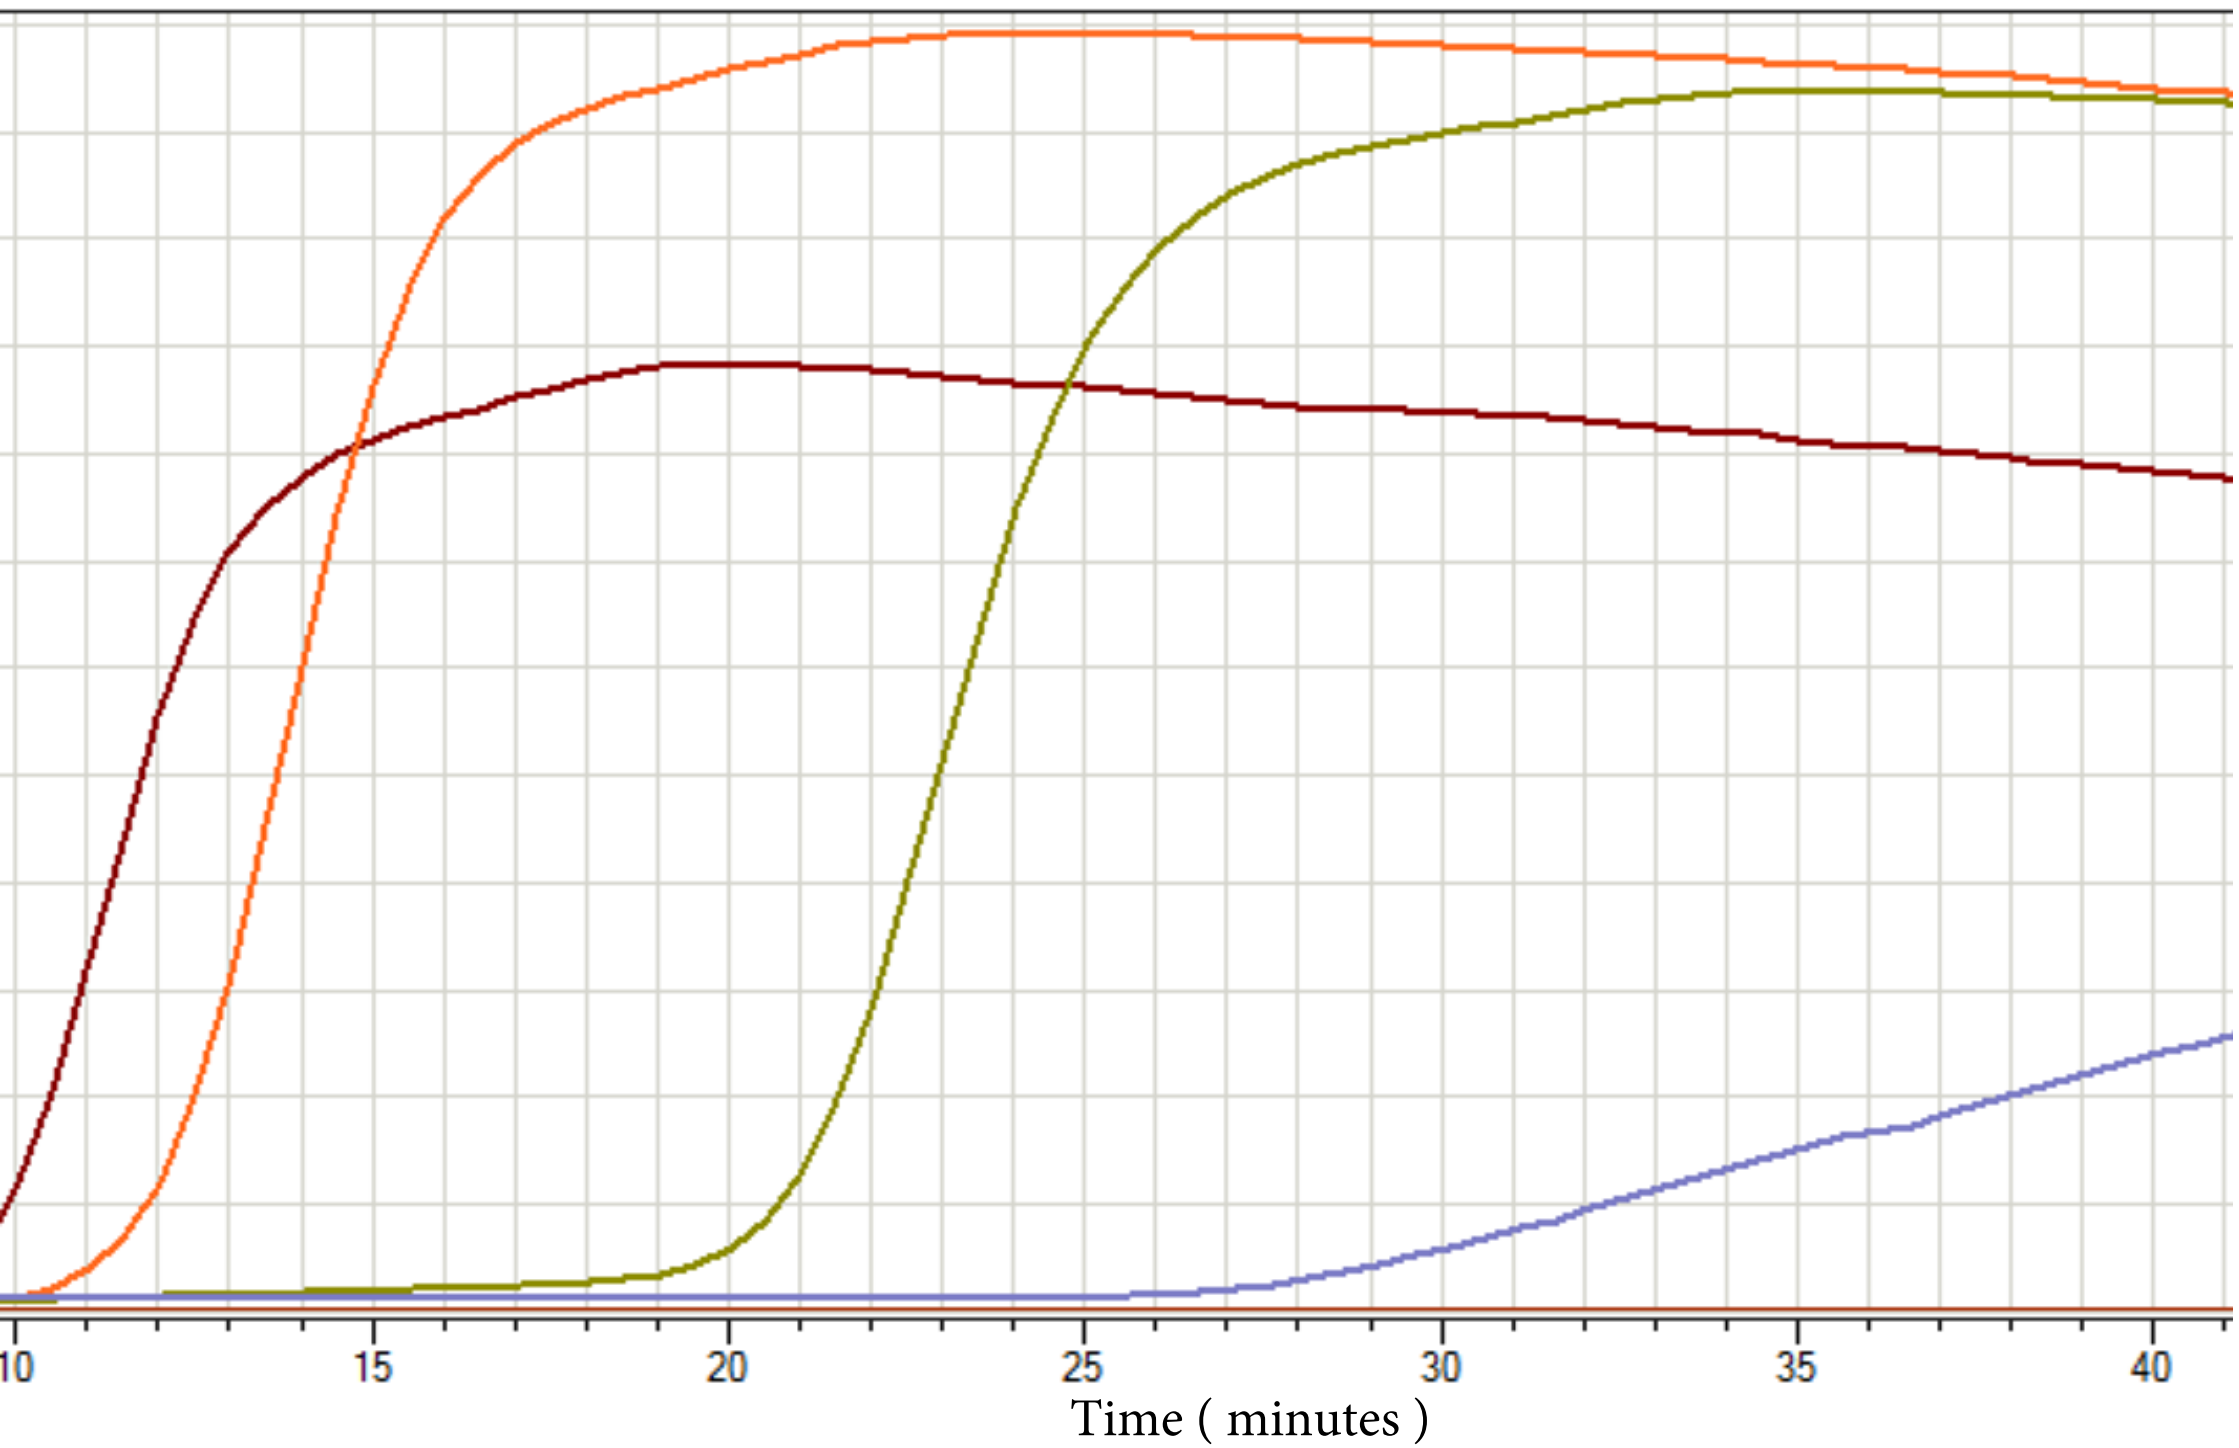

# Algorithm Processing Curve

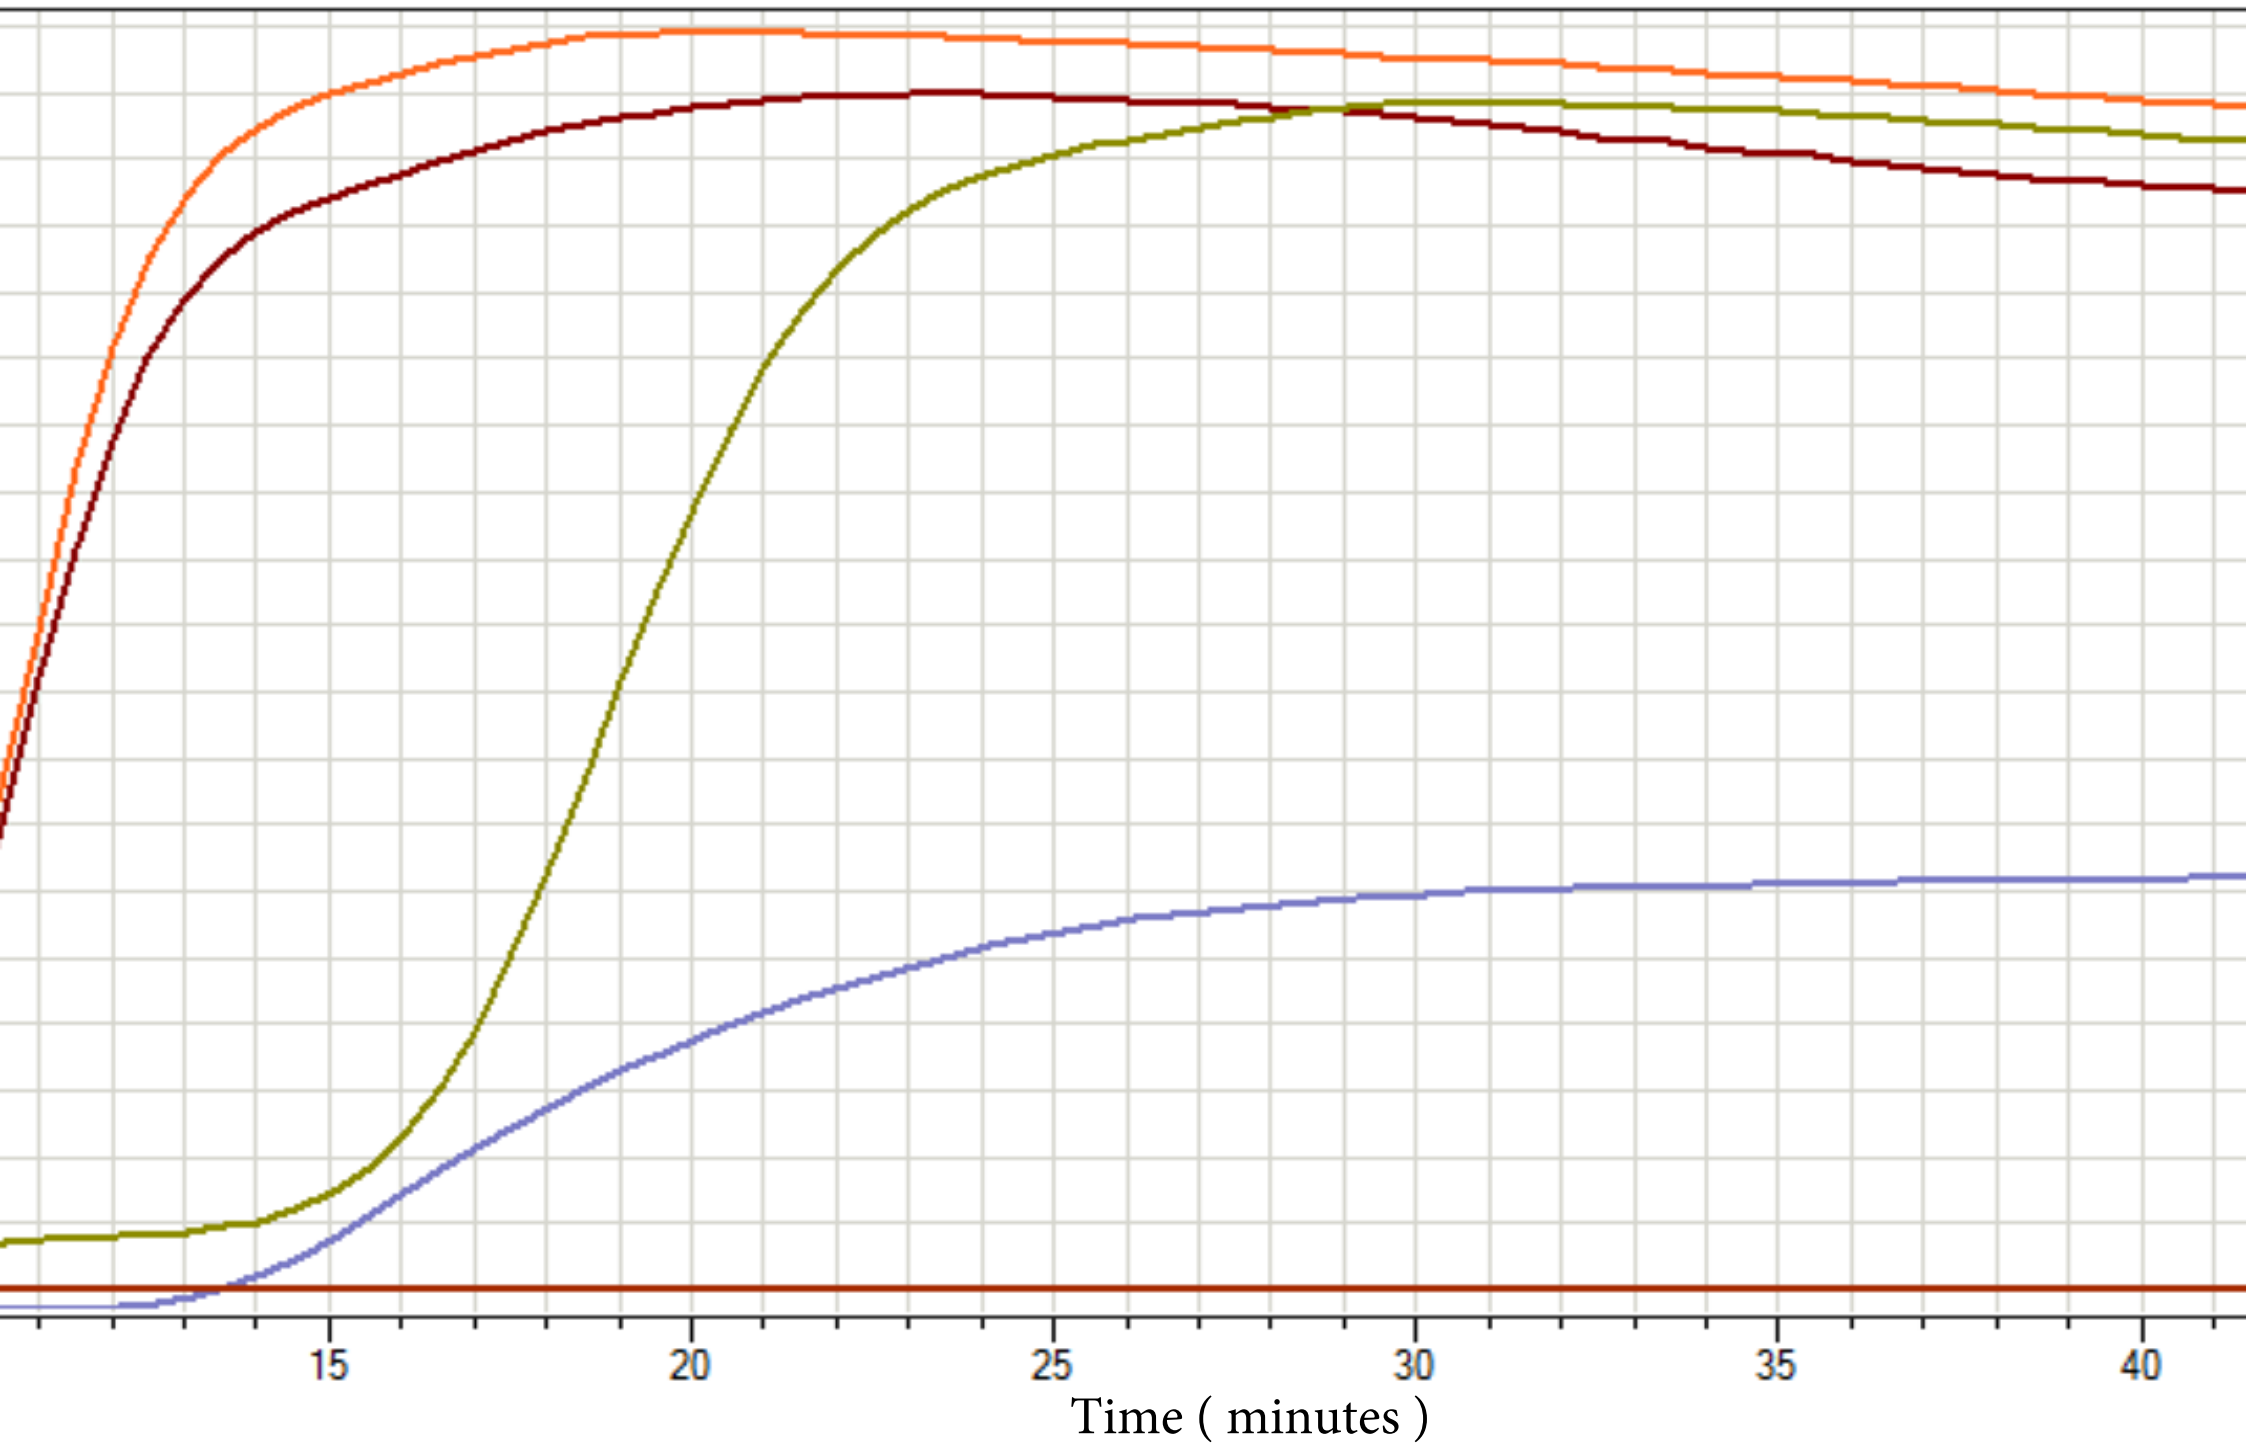

# Algorithm Processing Curve

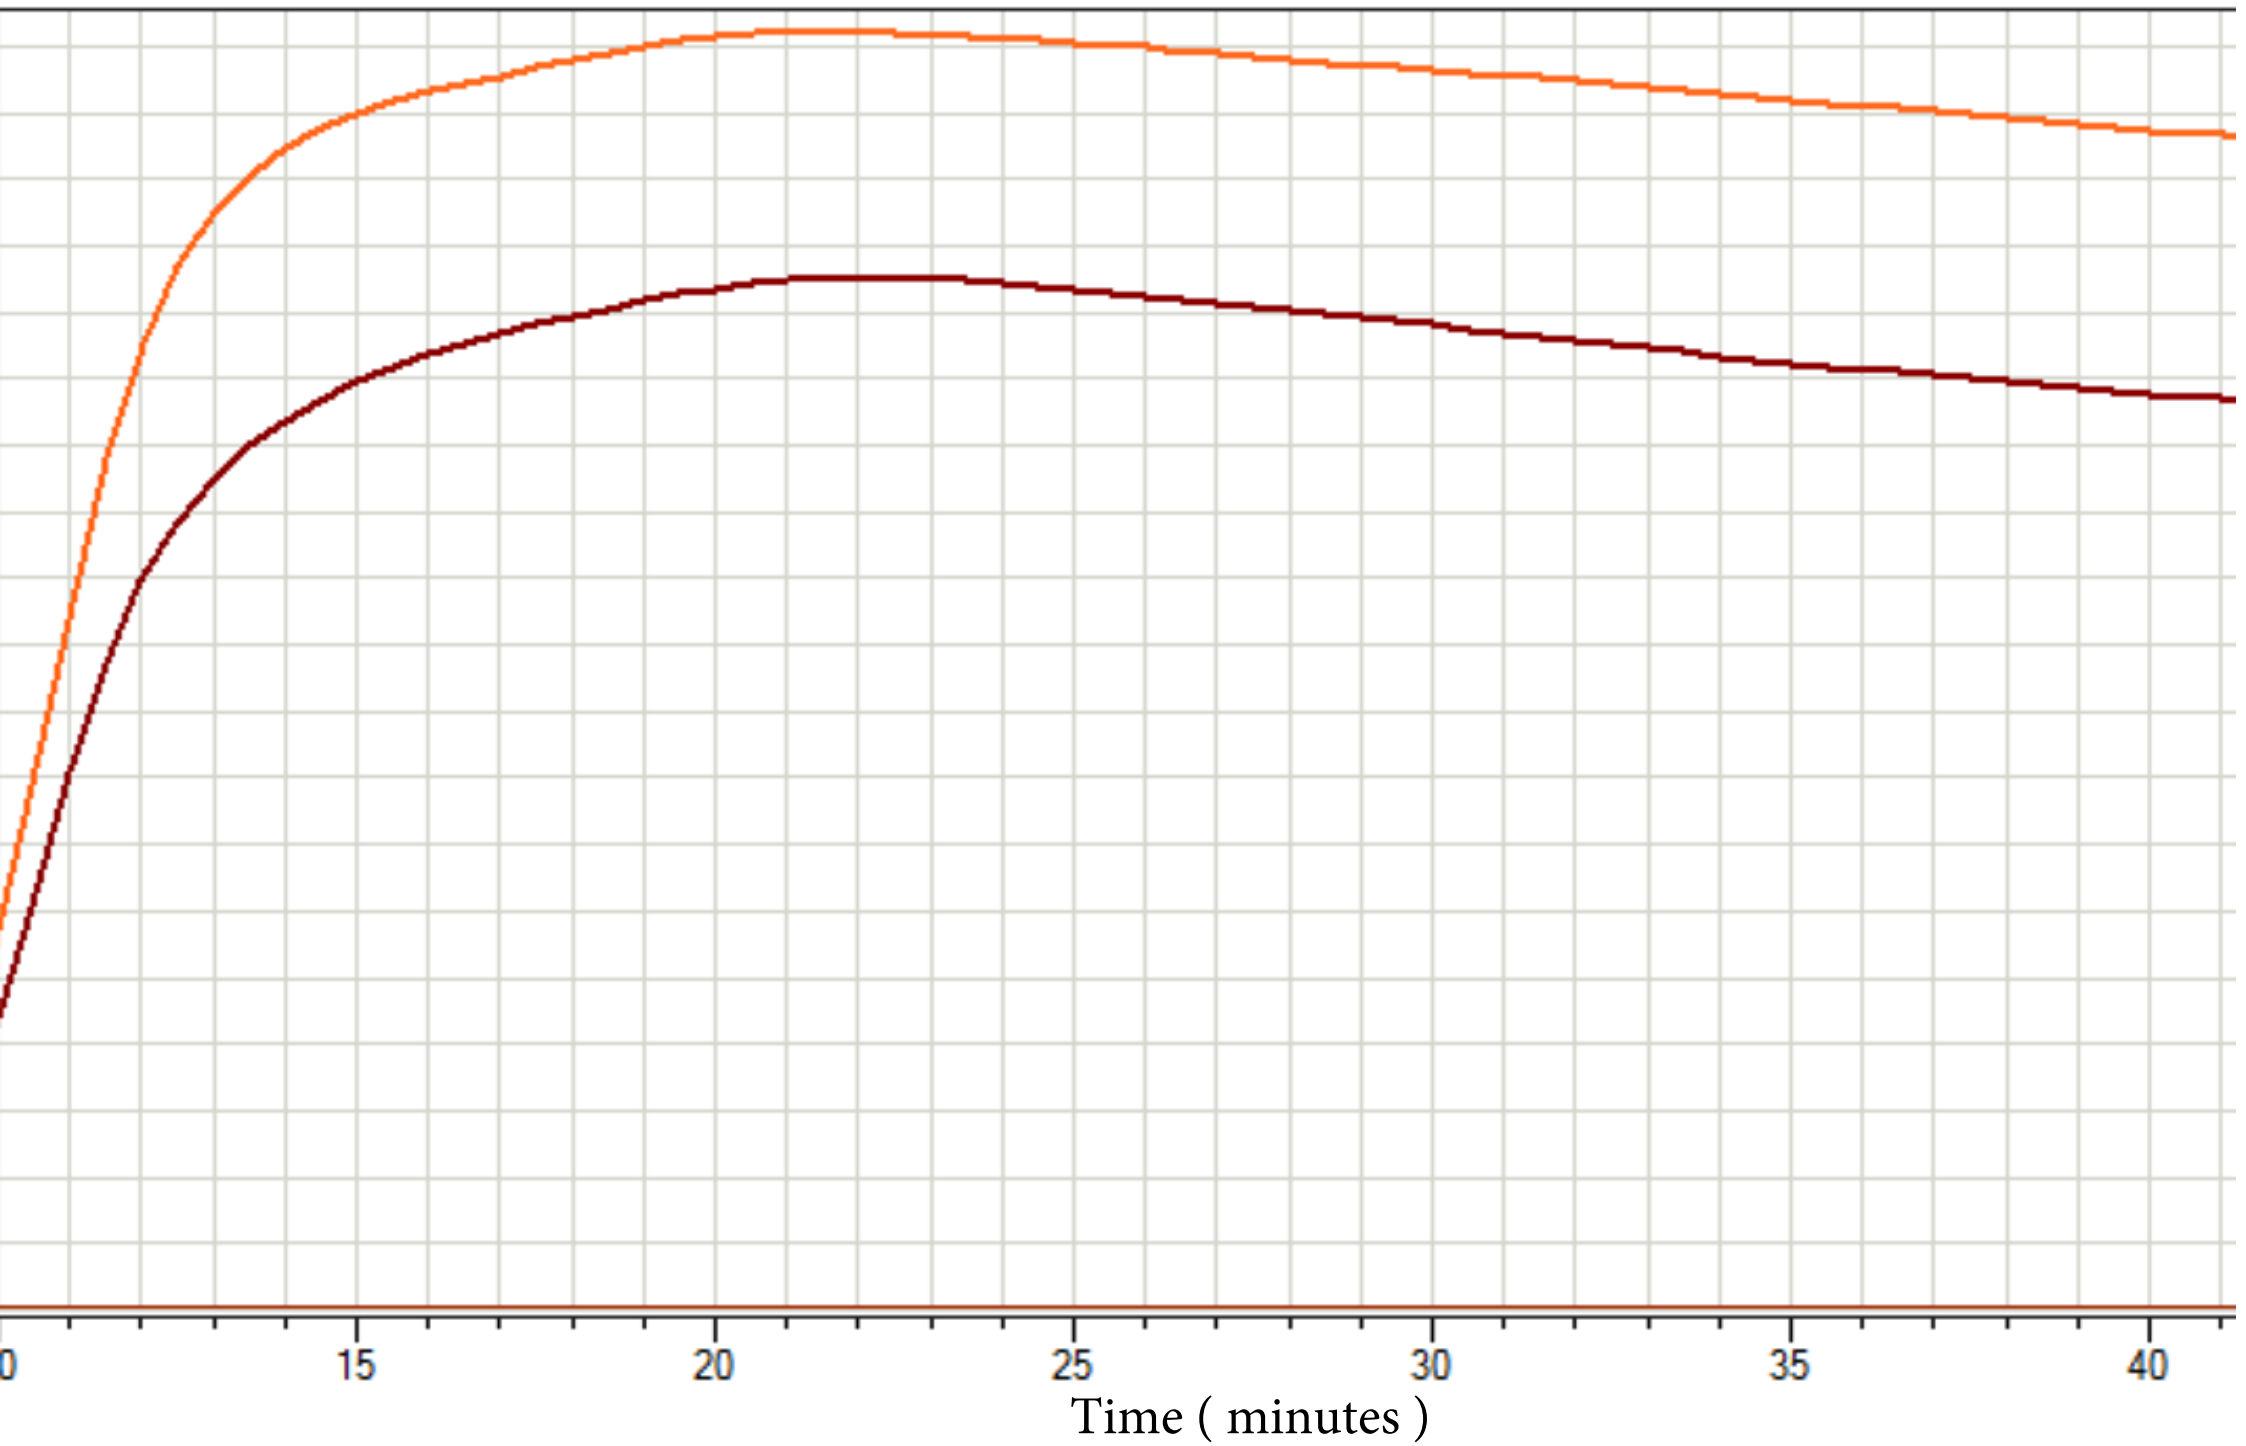

# Algorithm Processing Curve

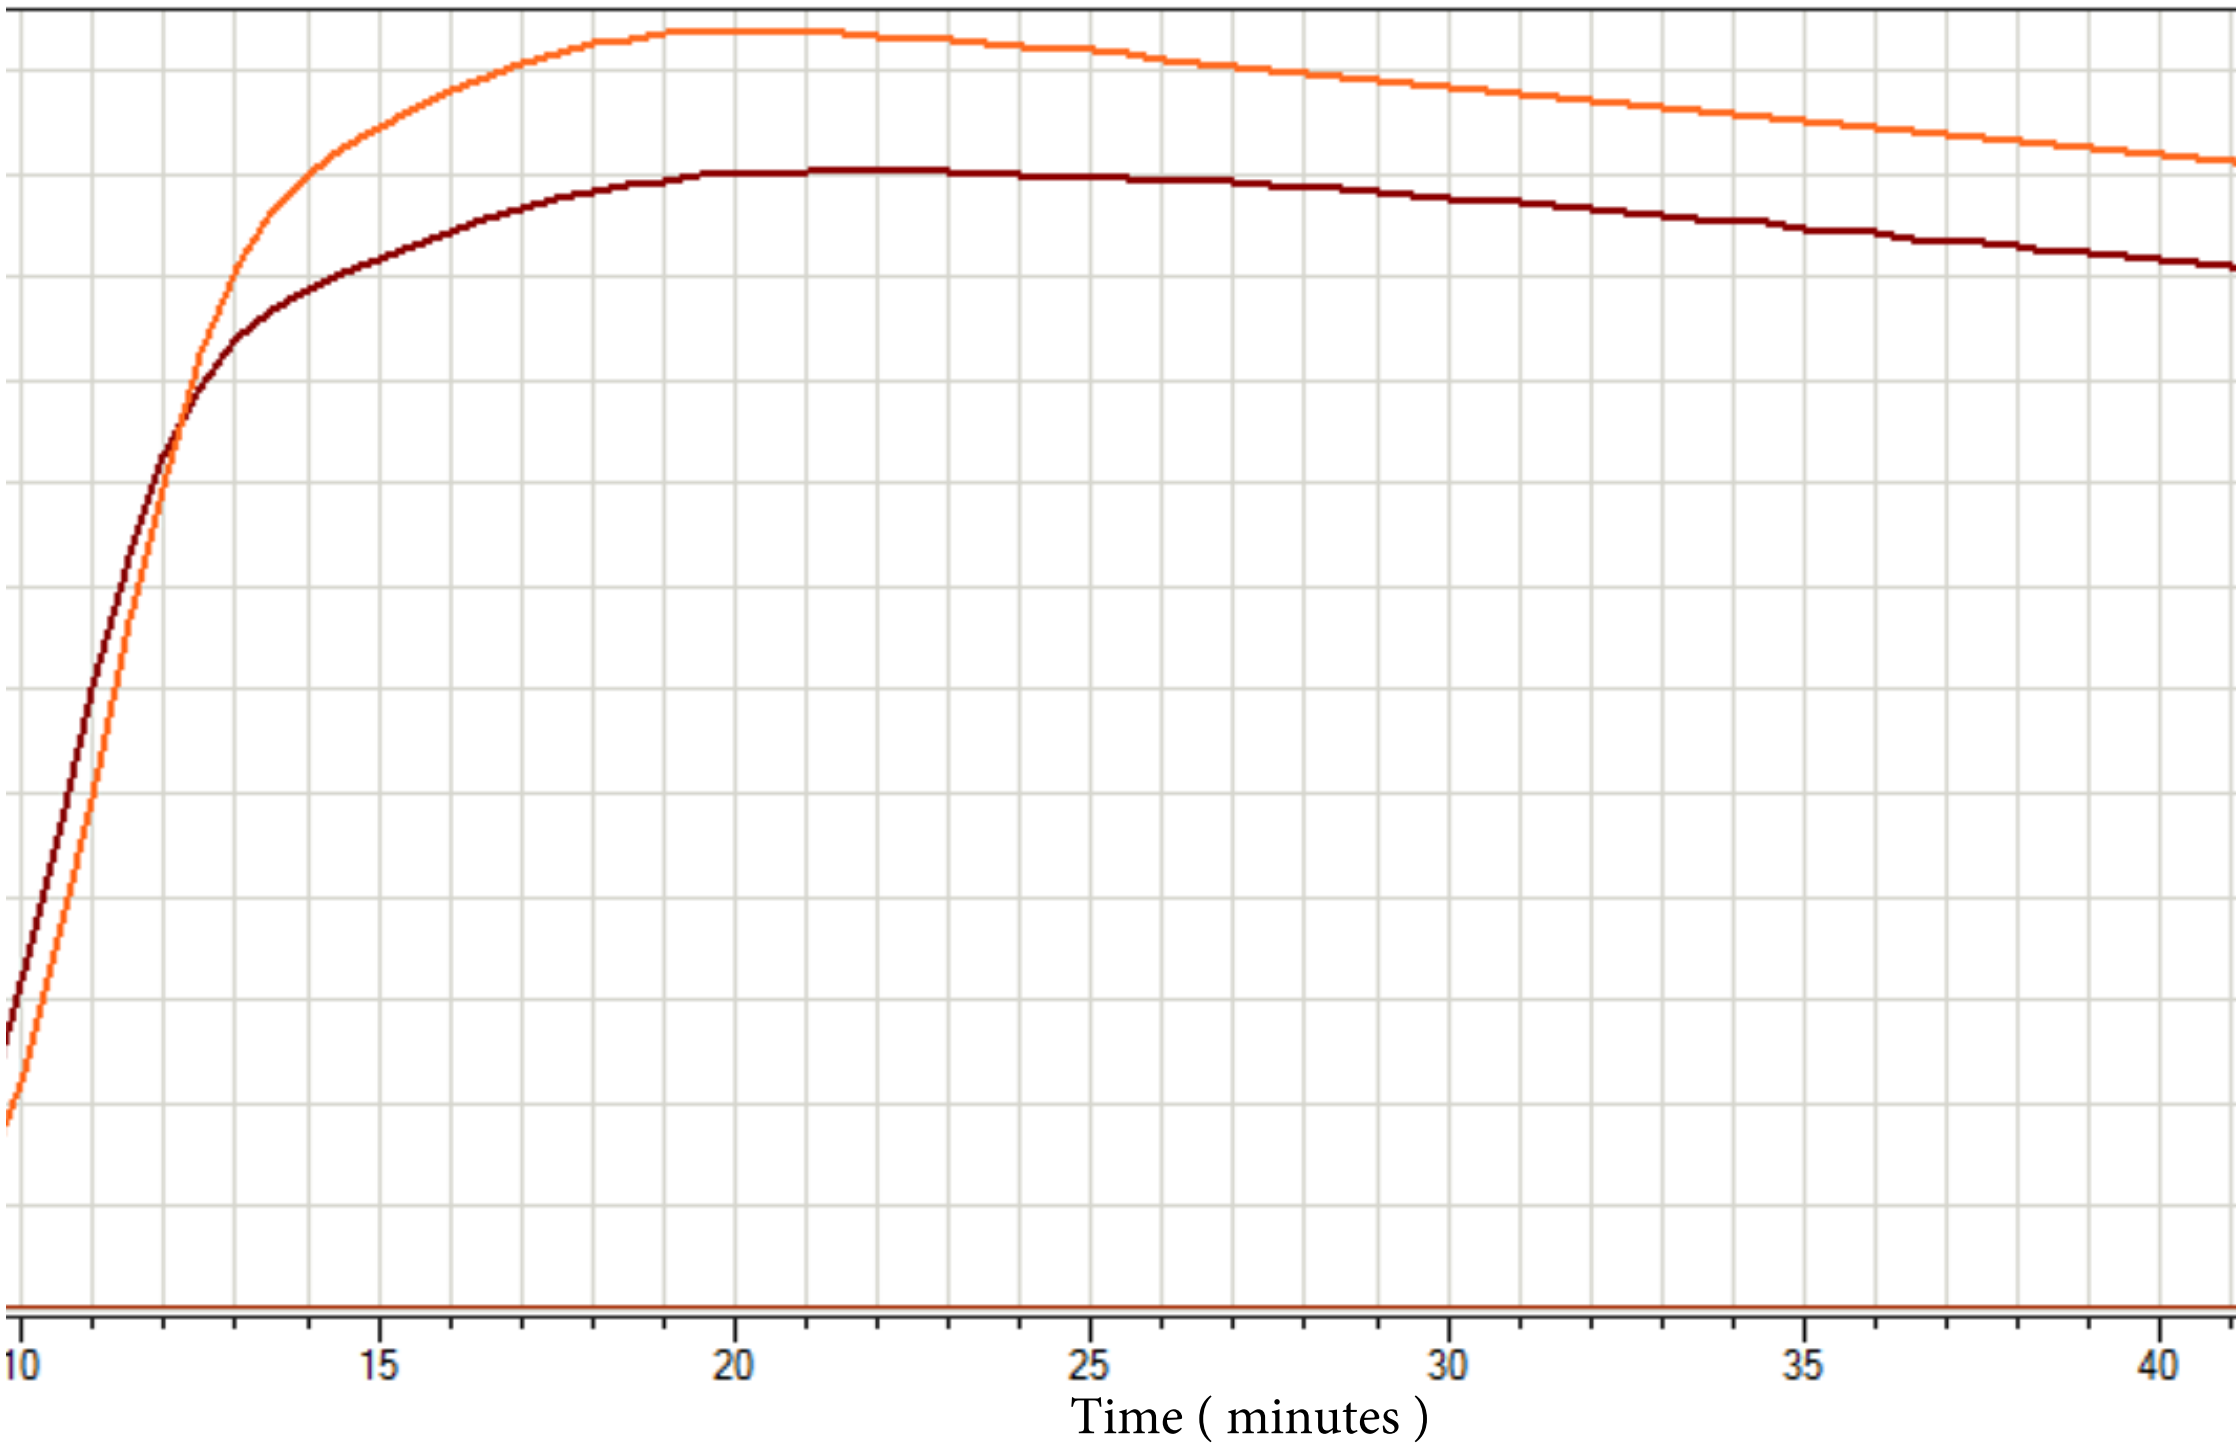

# Algorithm Processing Curve

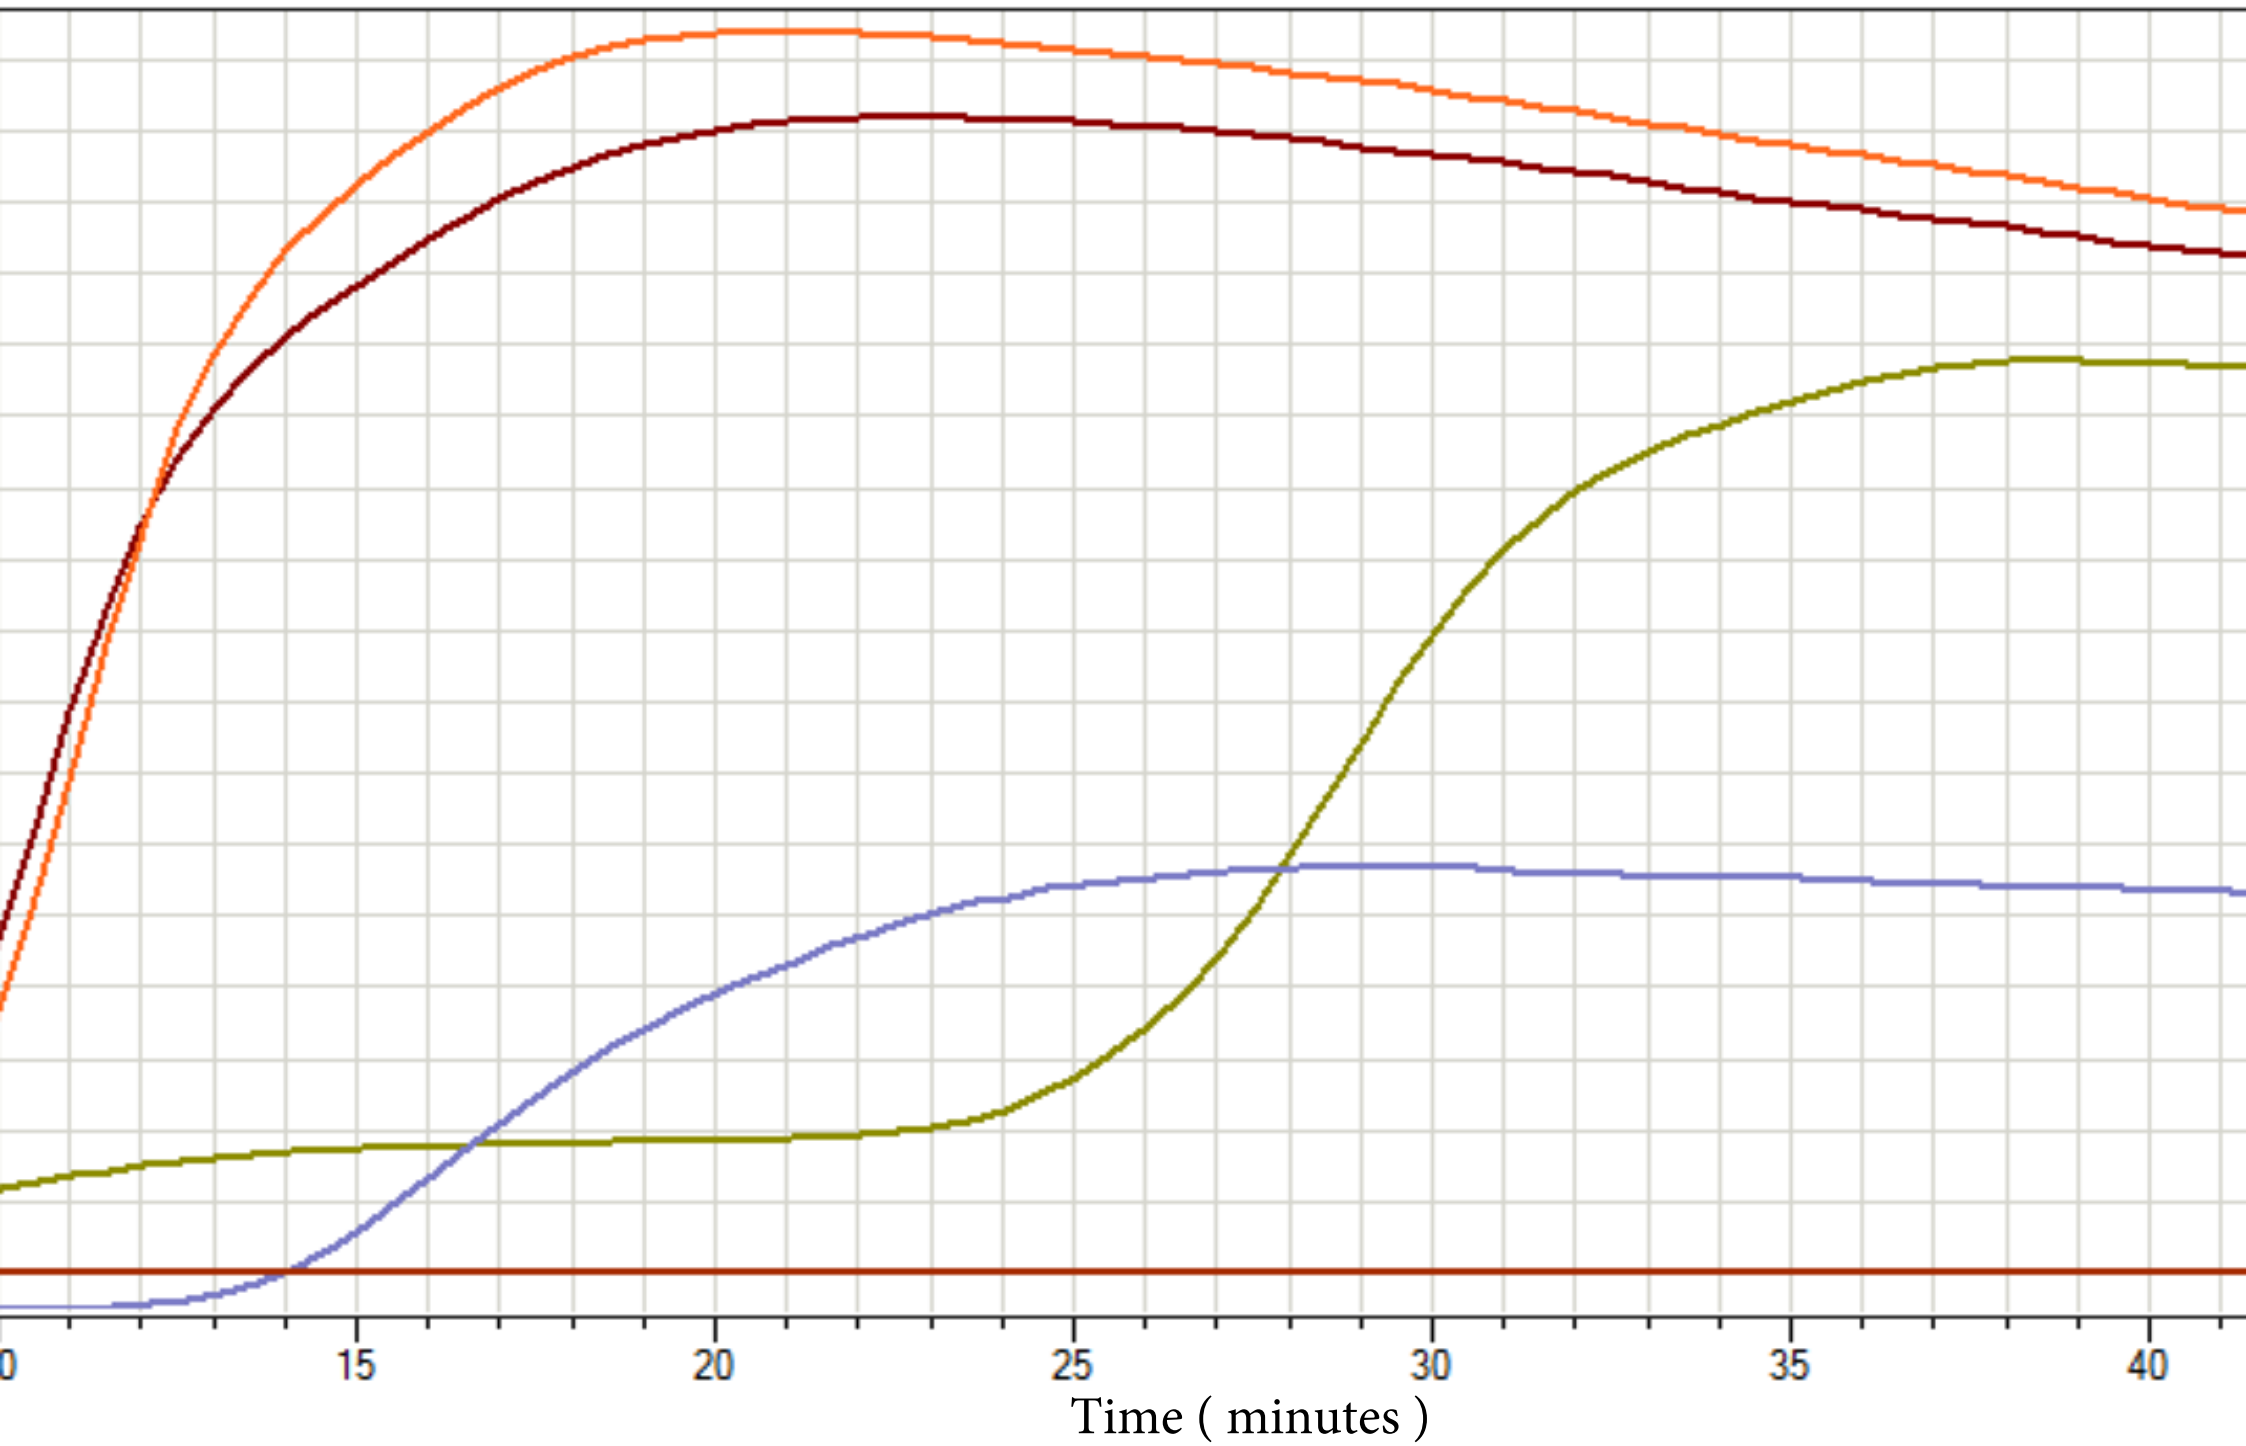

# Algorithm Processing Curve

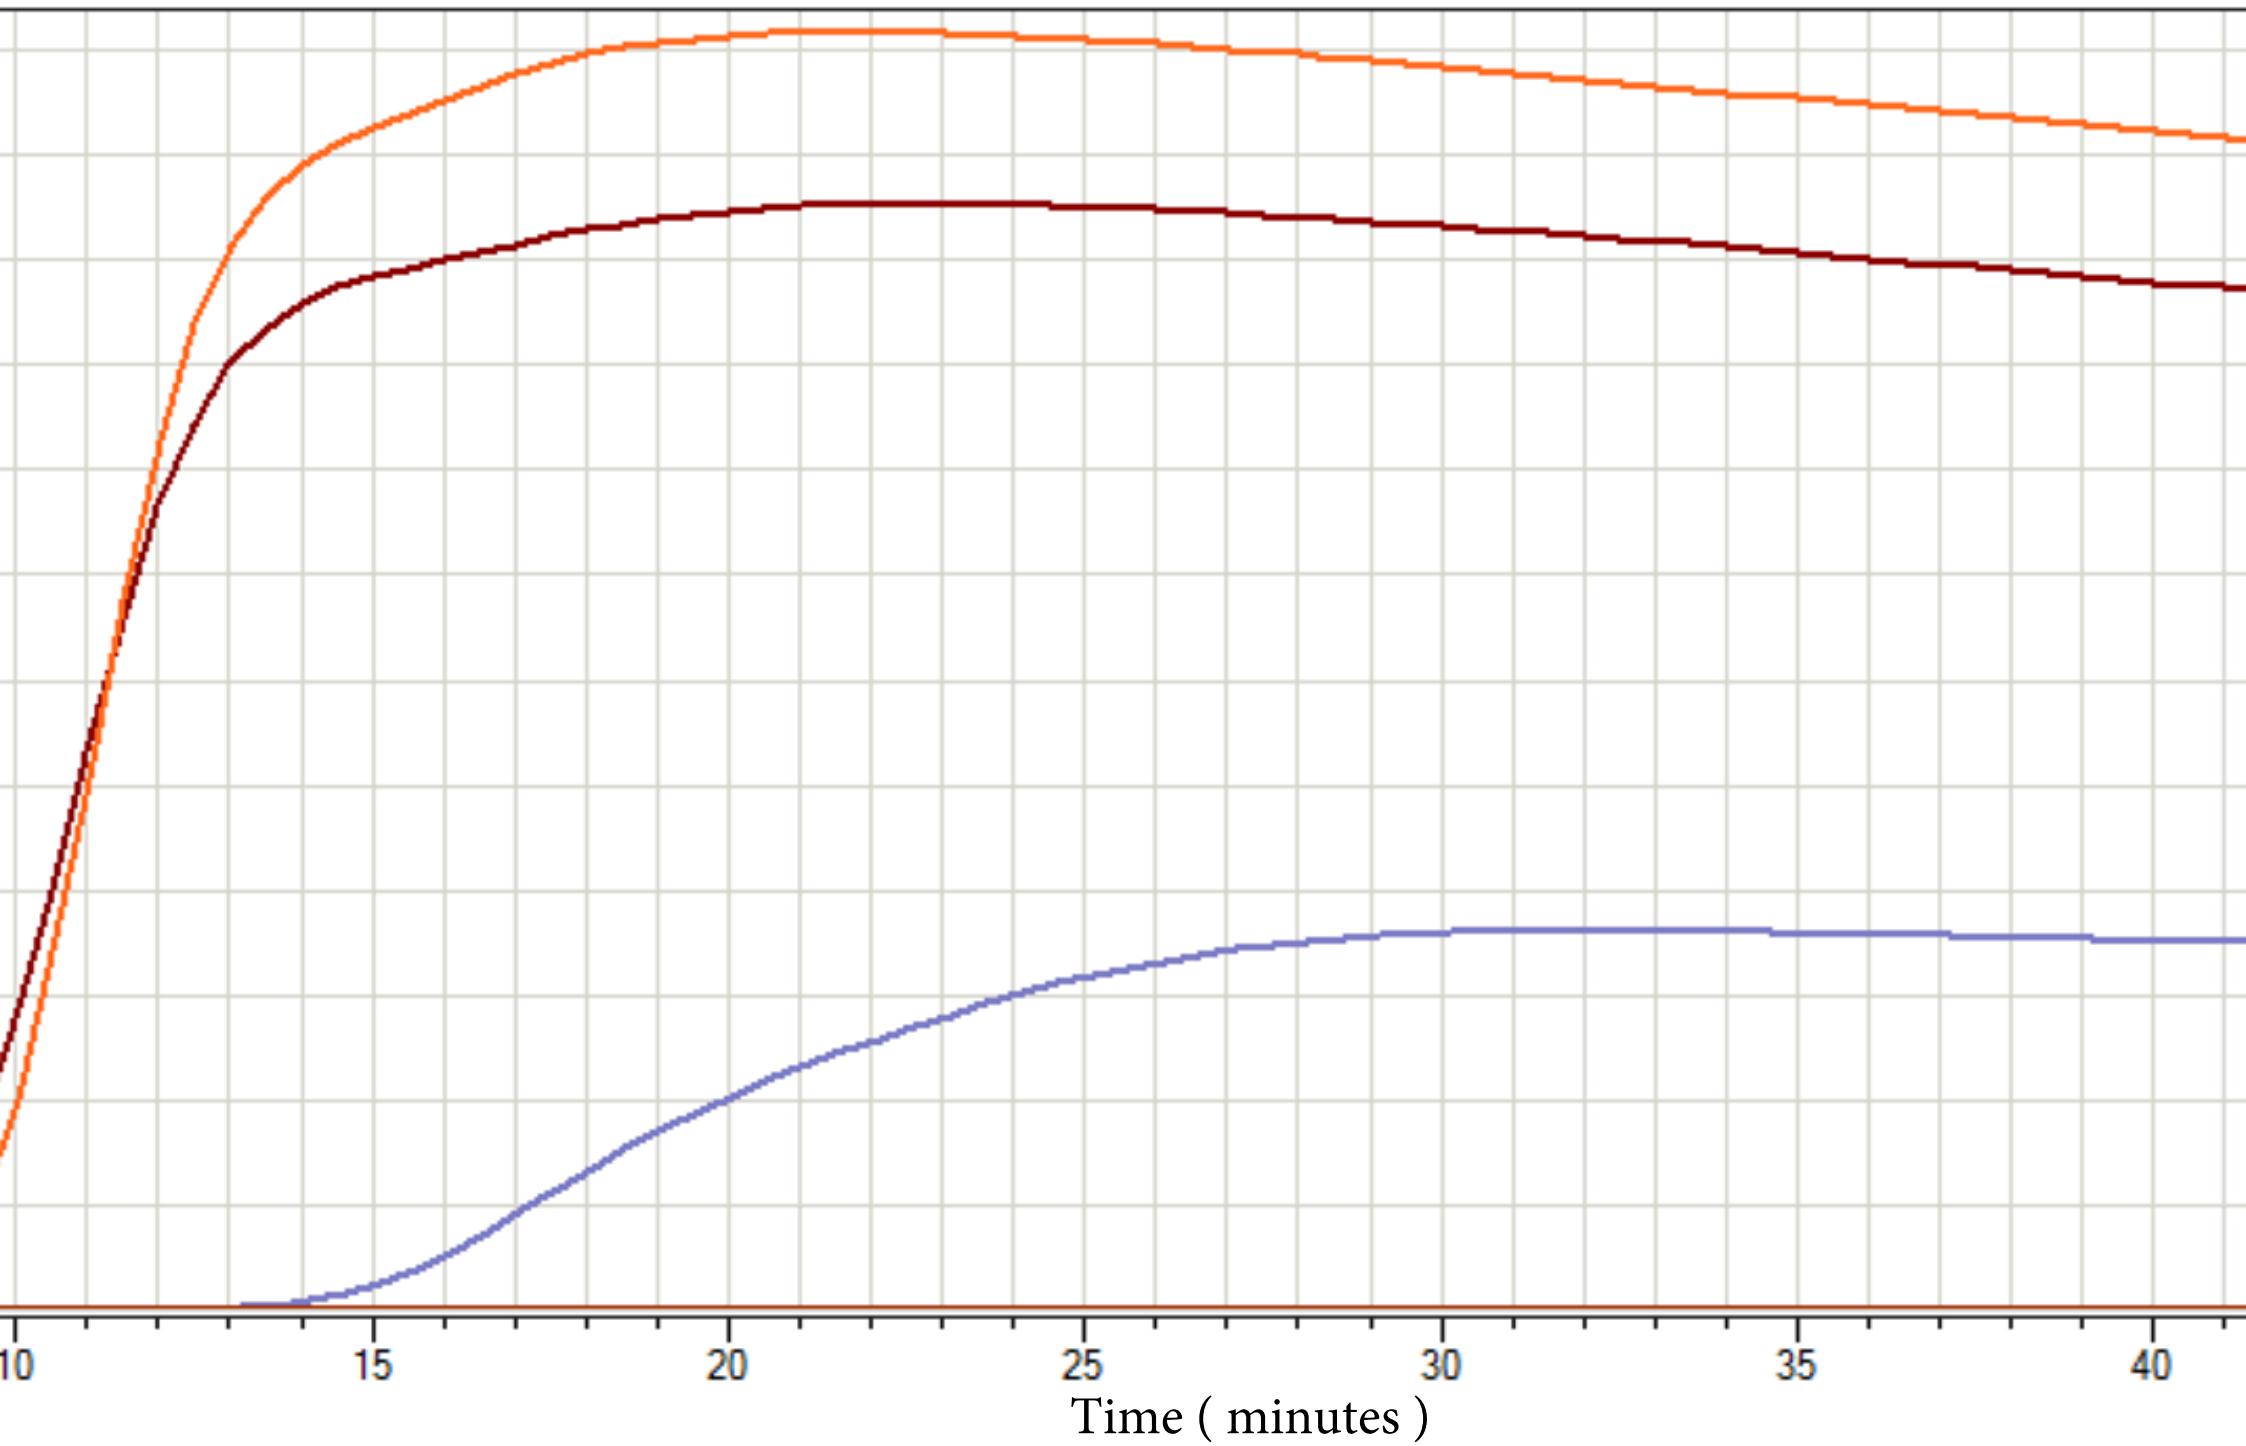

# Algorithm Processing Curve

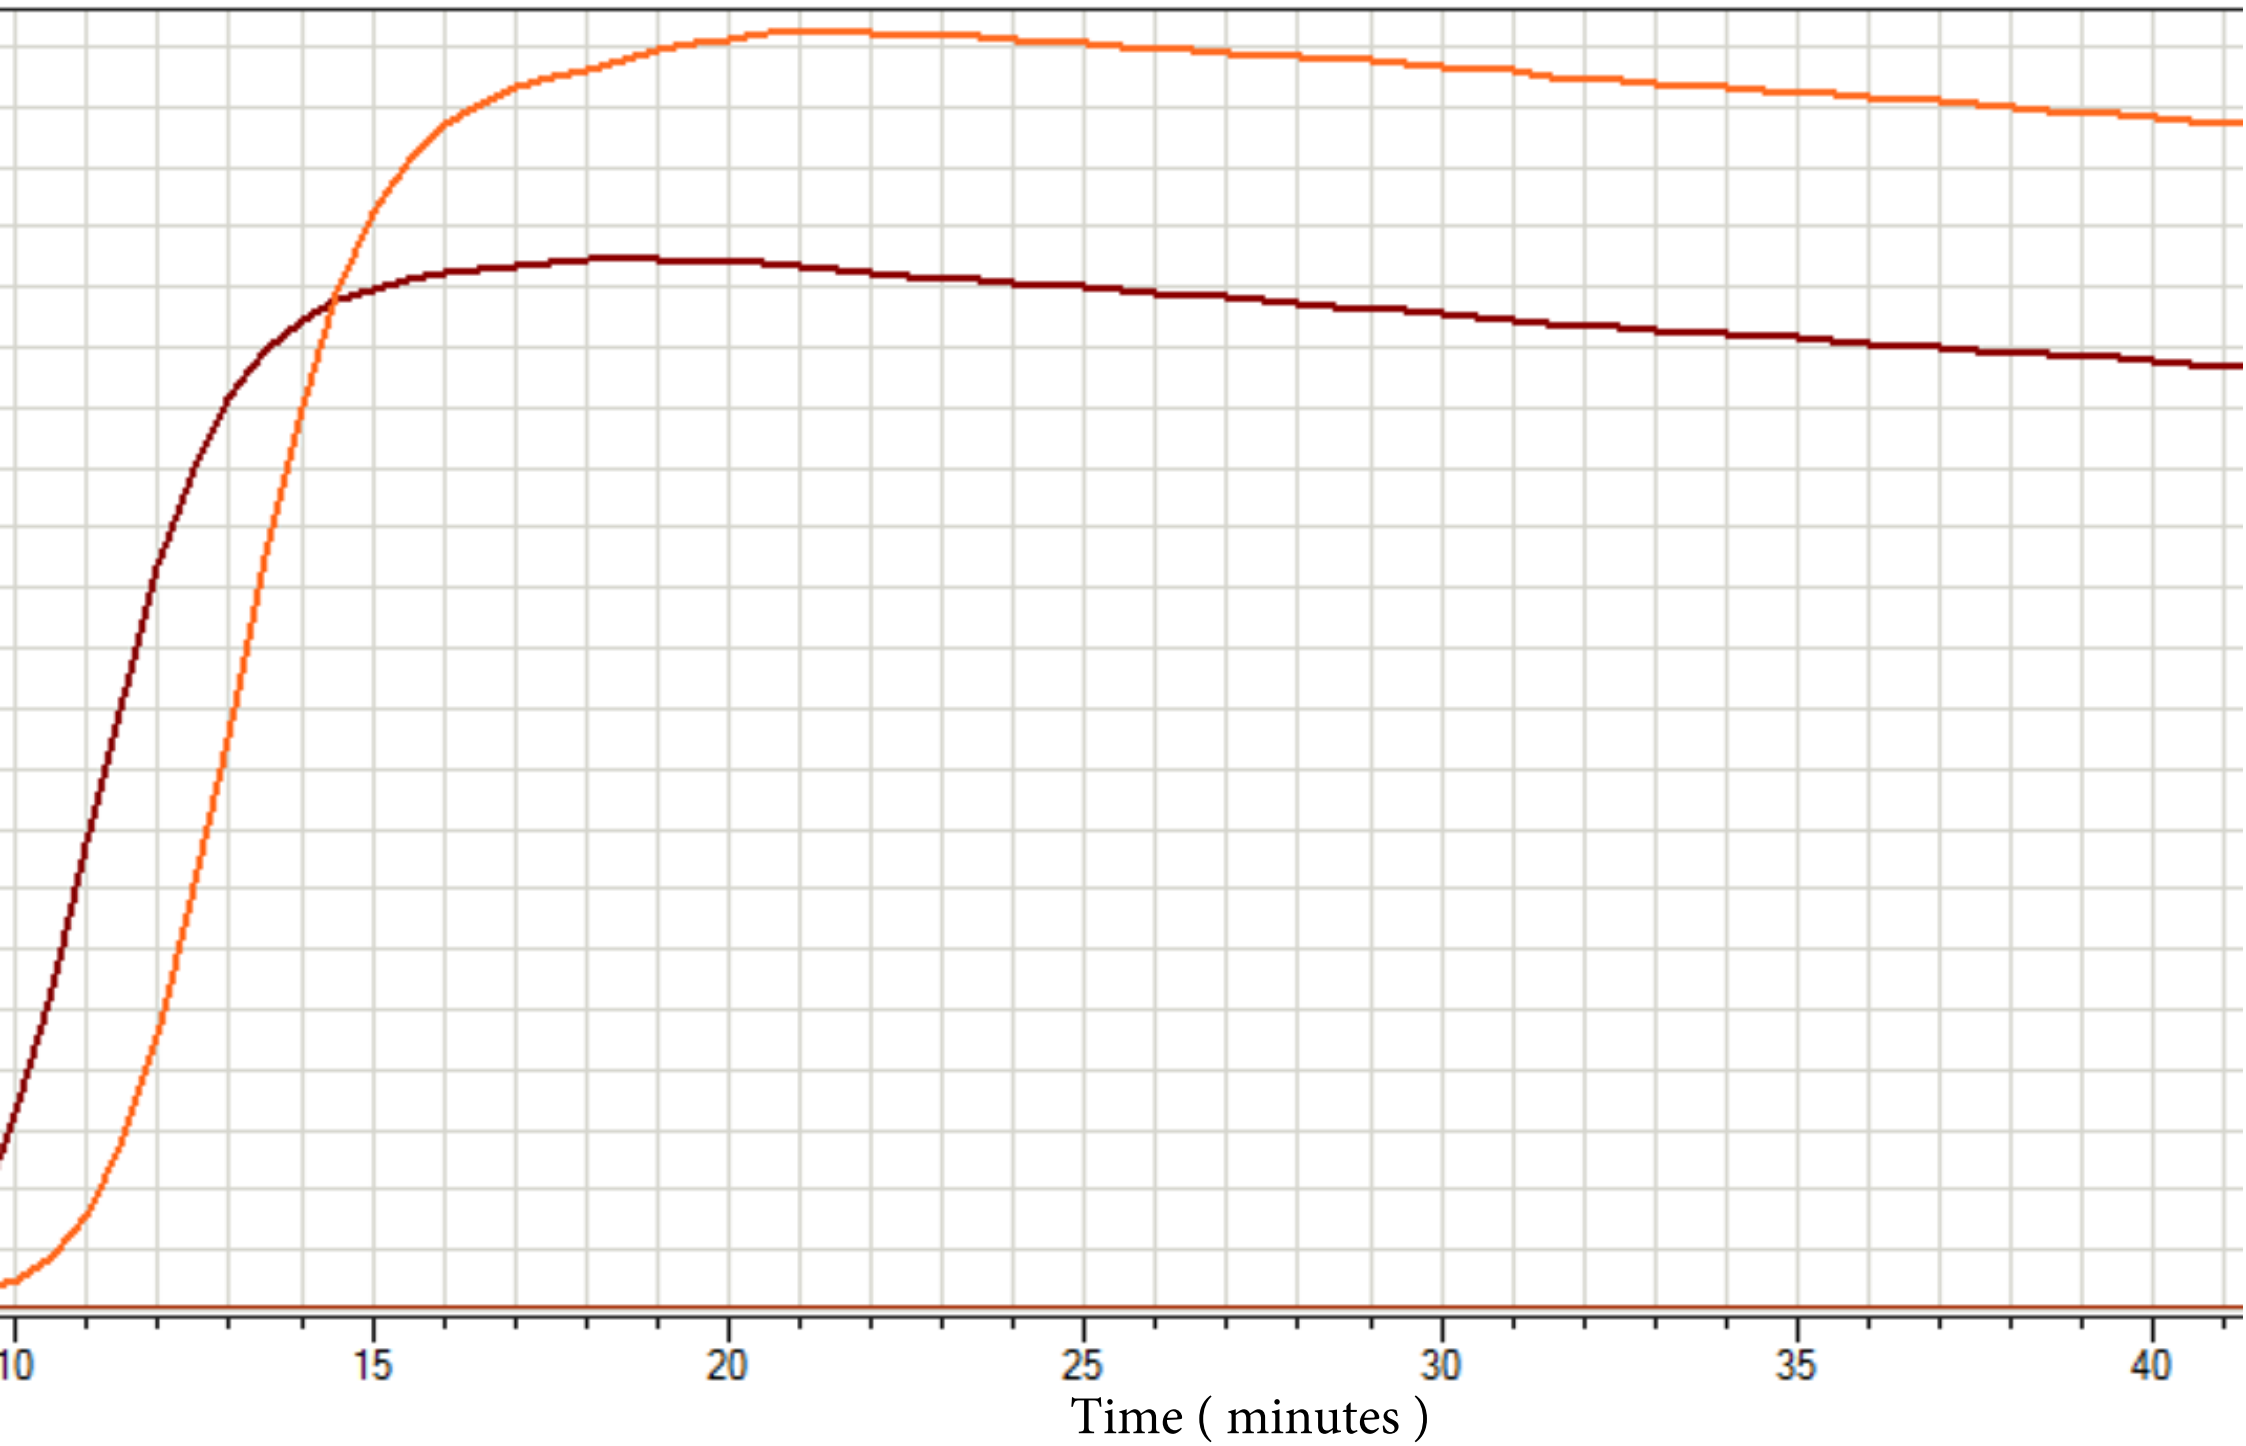



# Algorithm Processing Curve

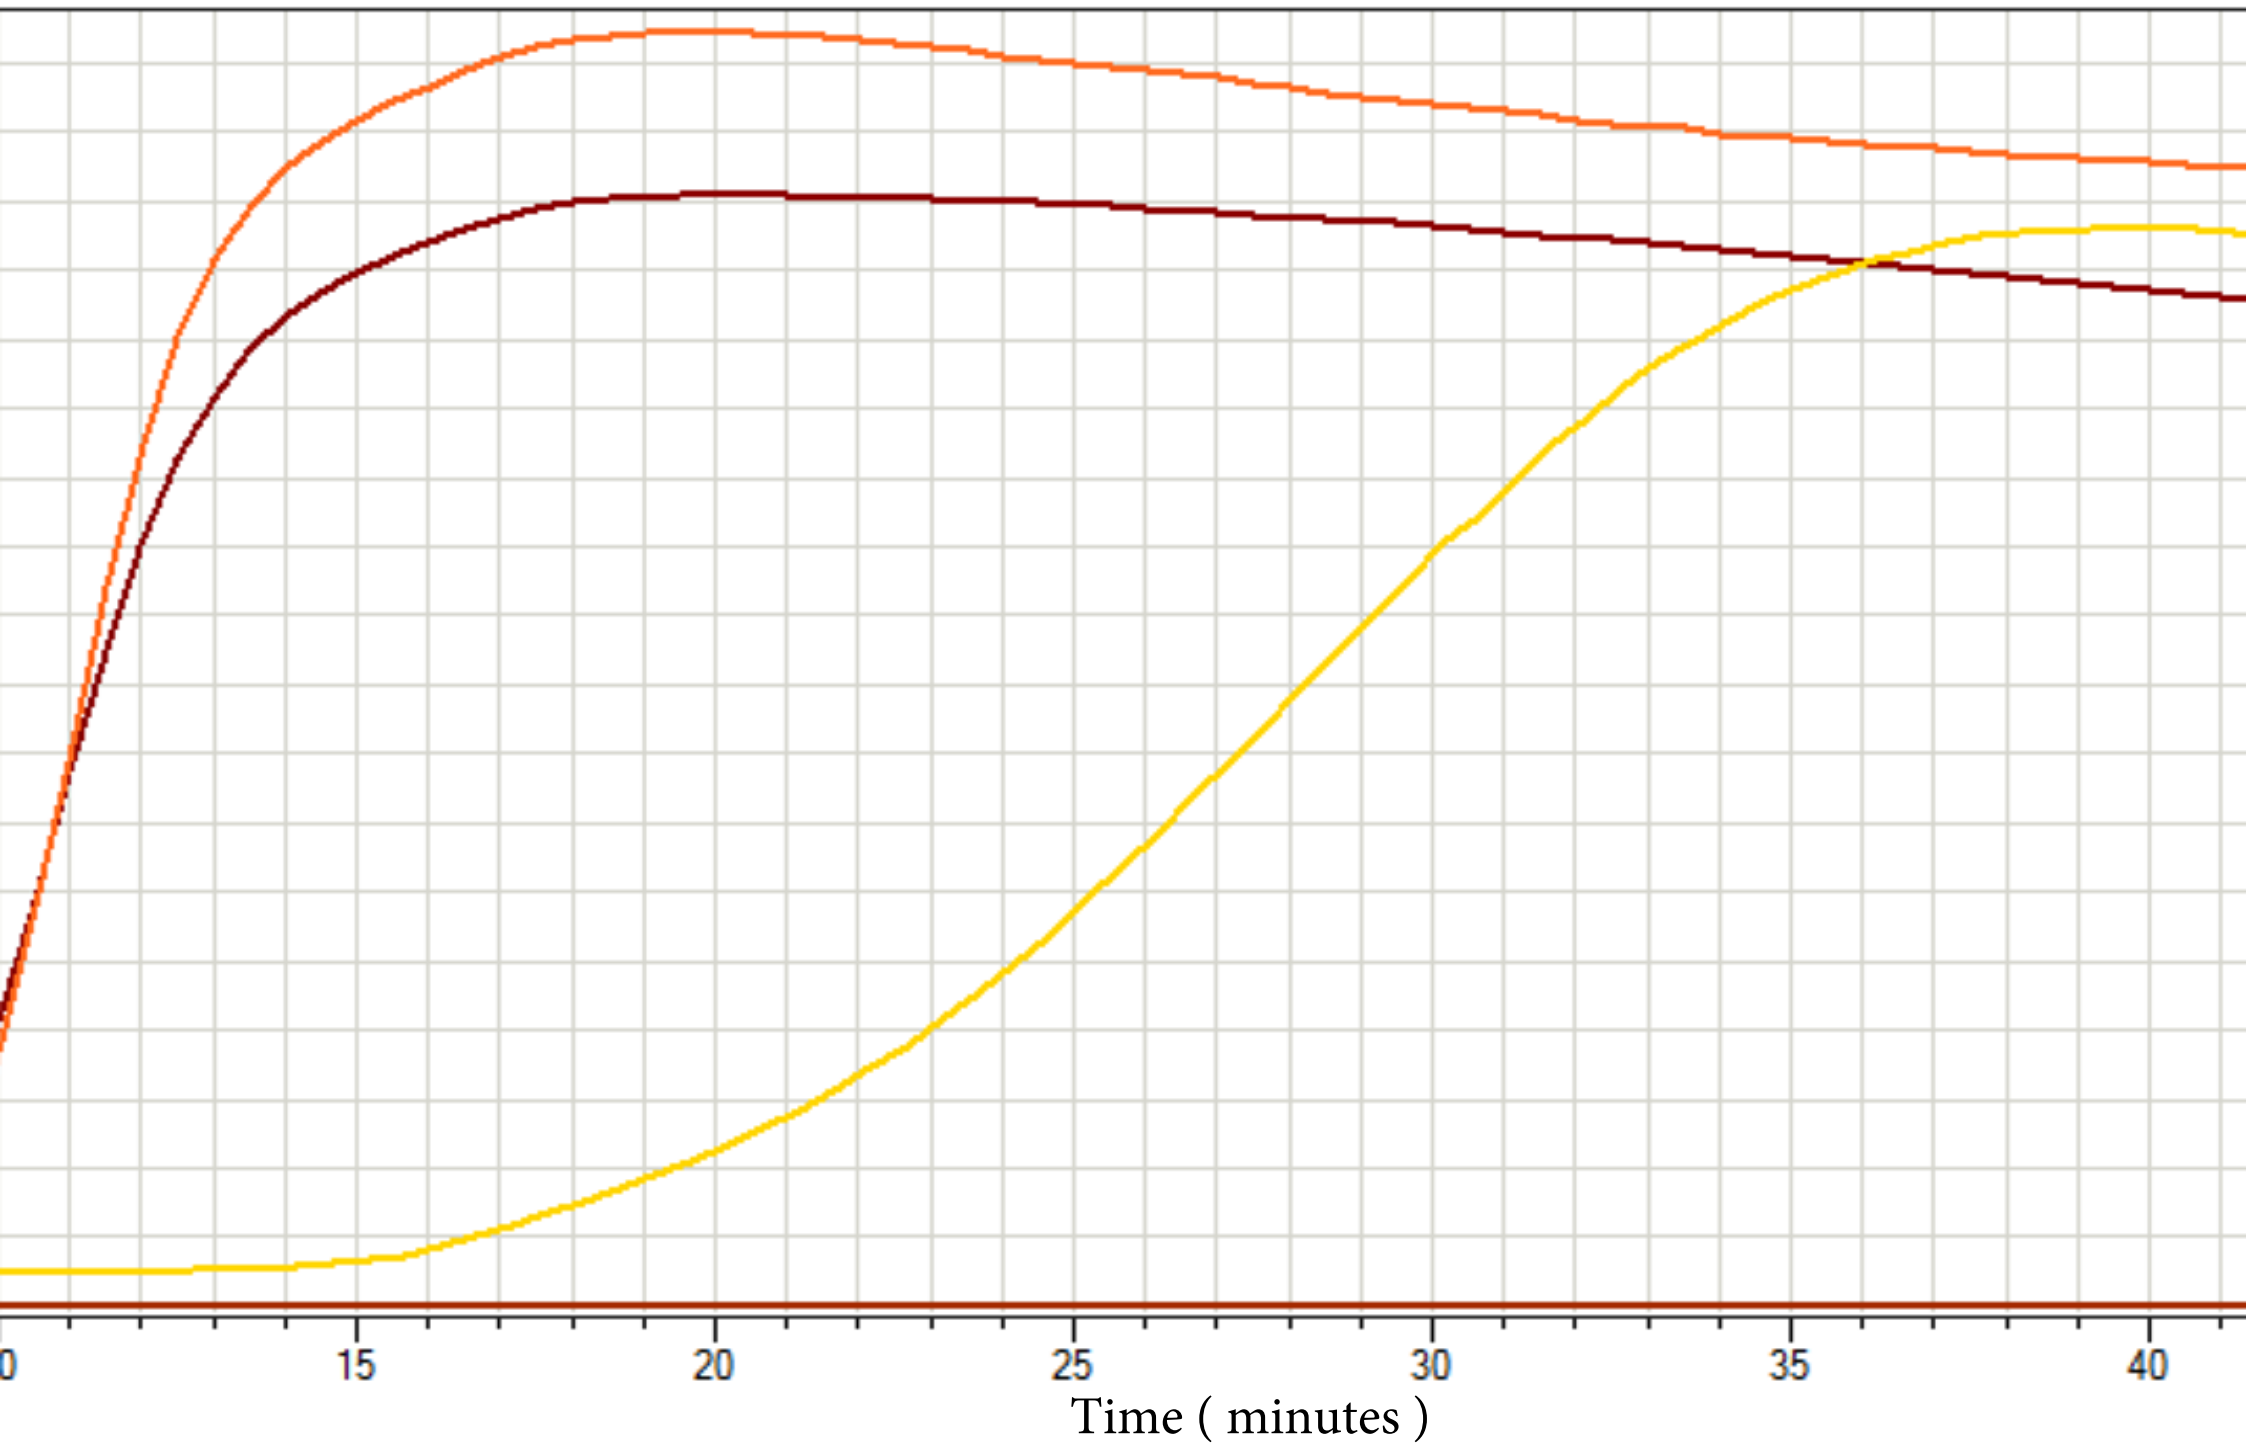

# Algorithm Processing Curve

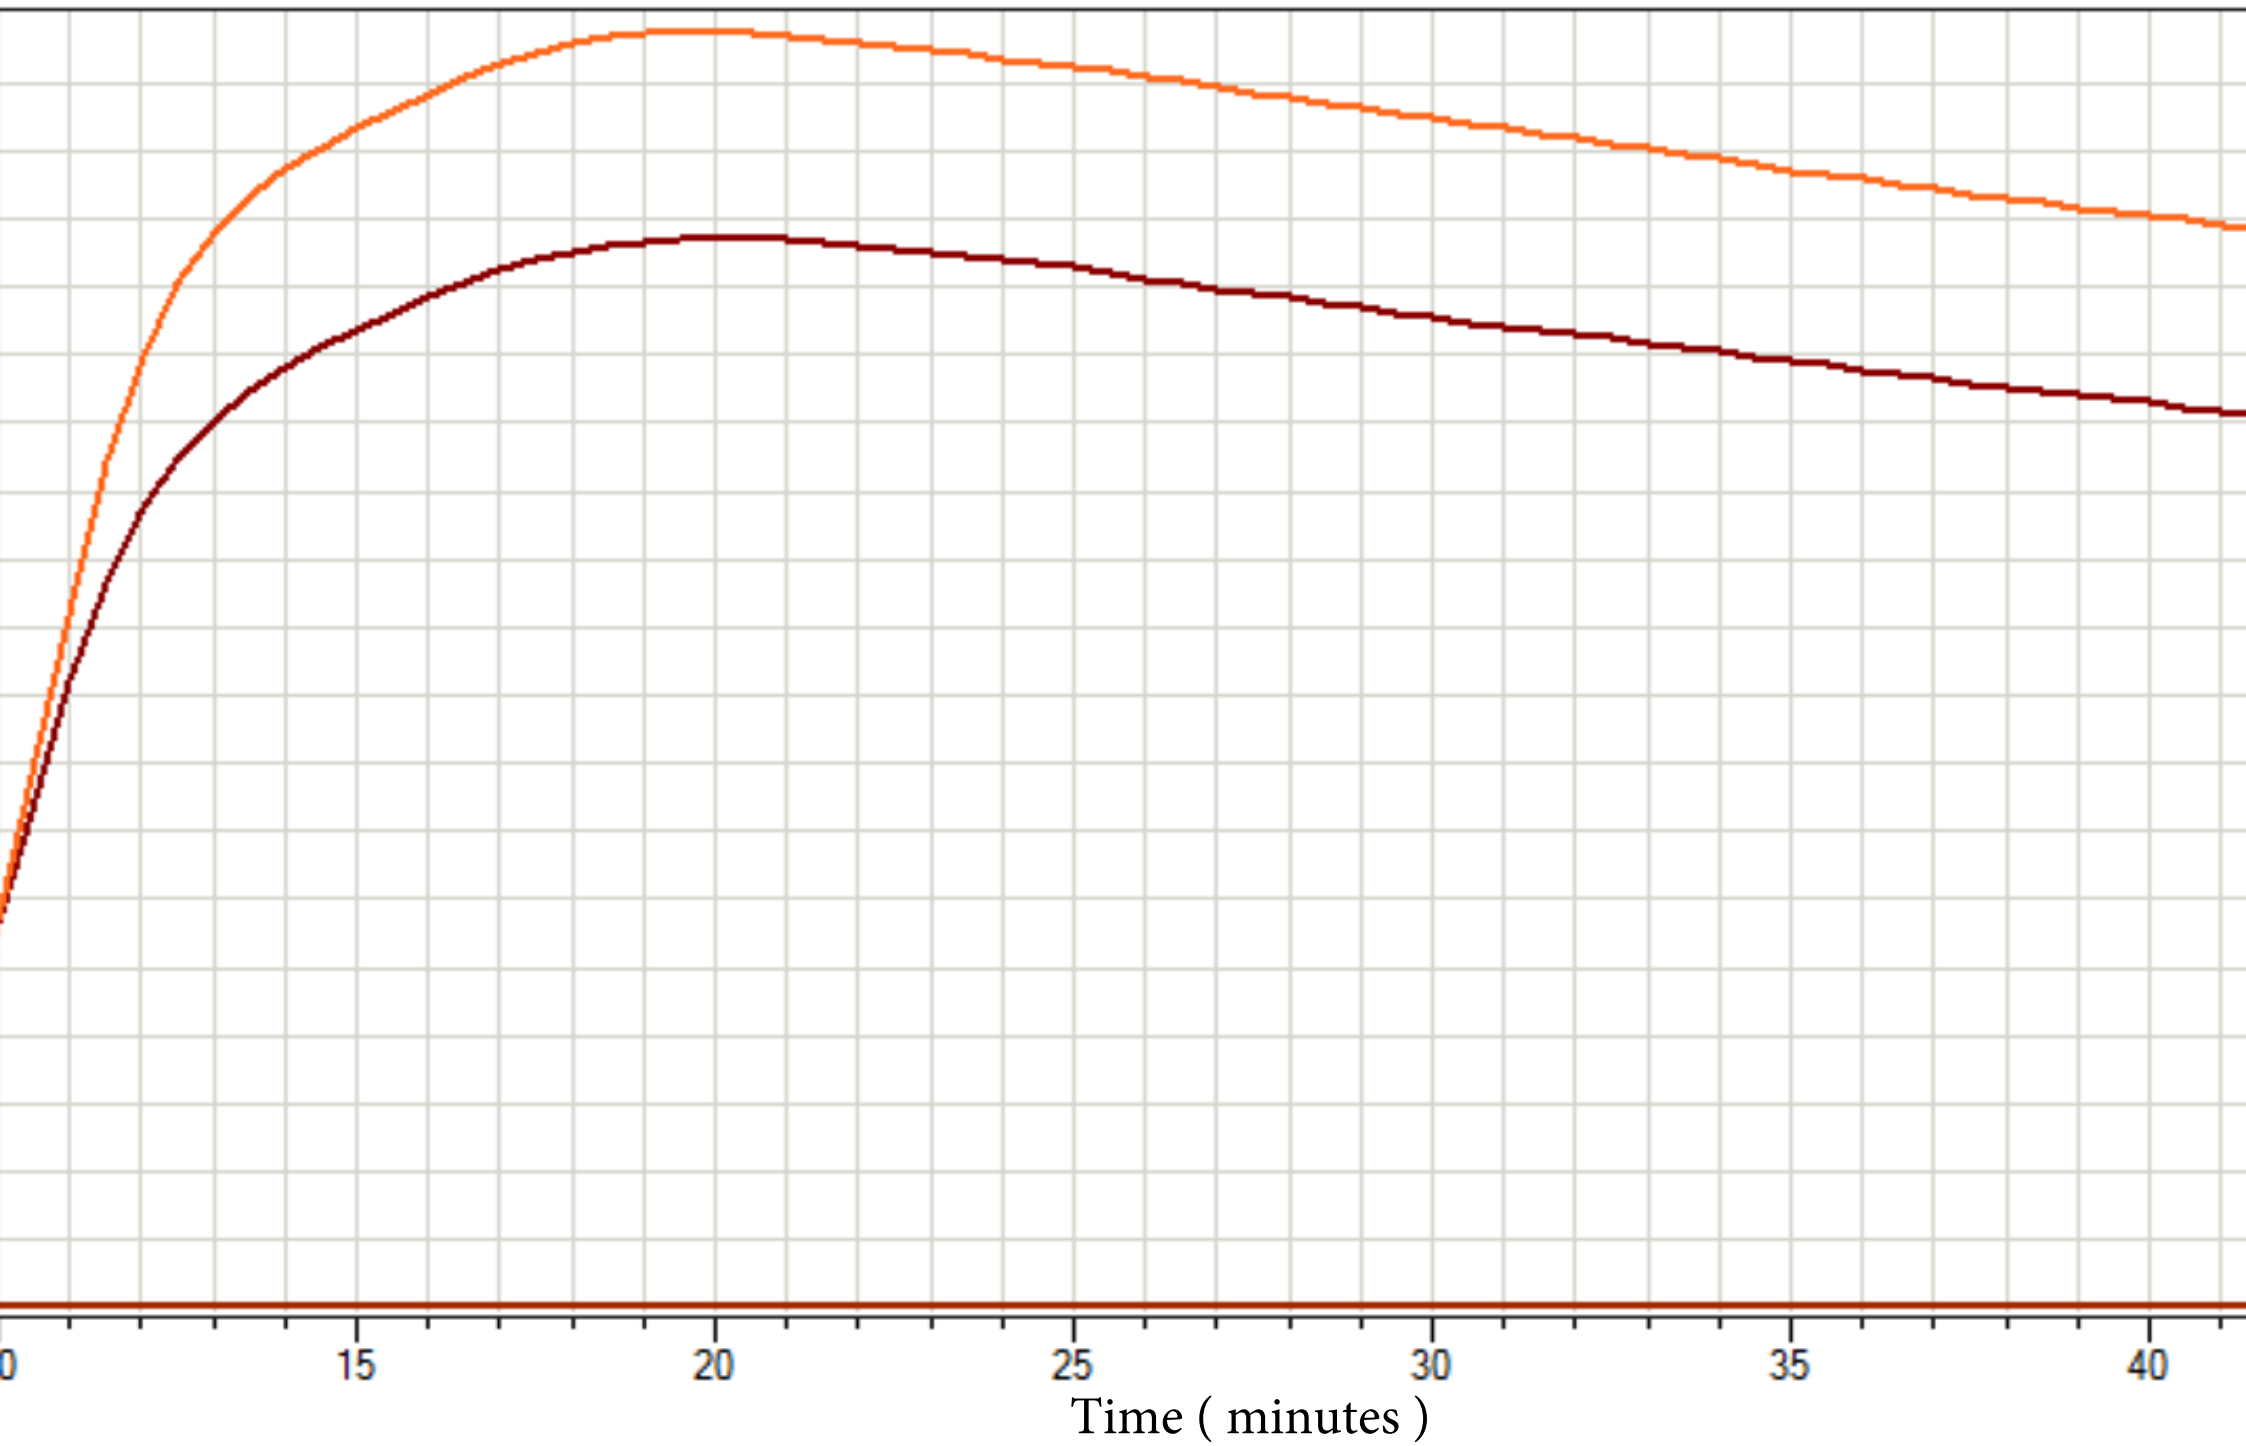

# Algorithm Processing Curve

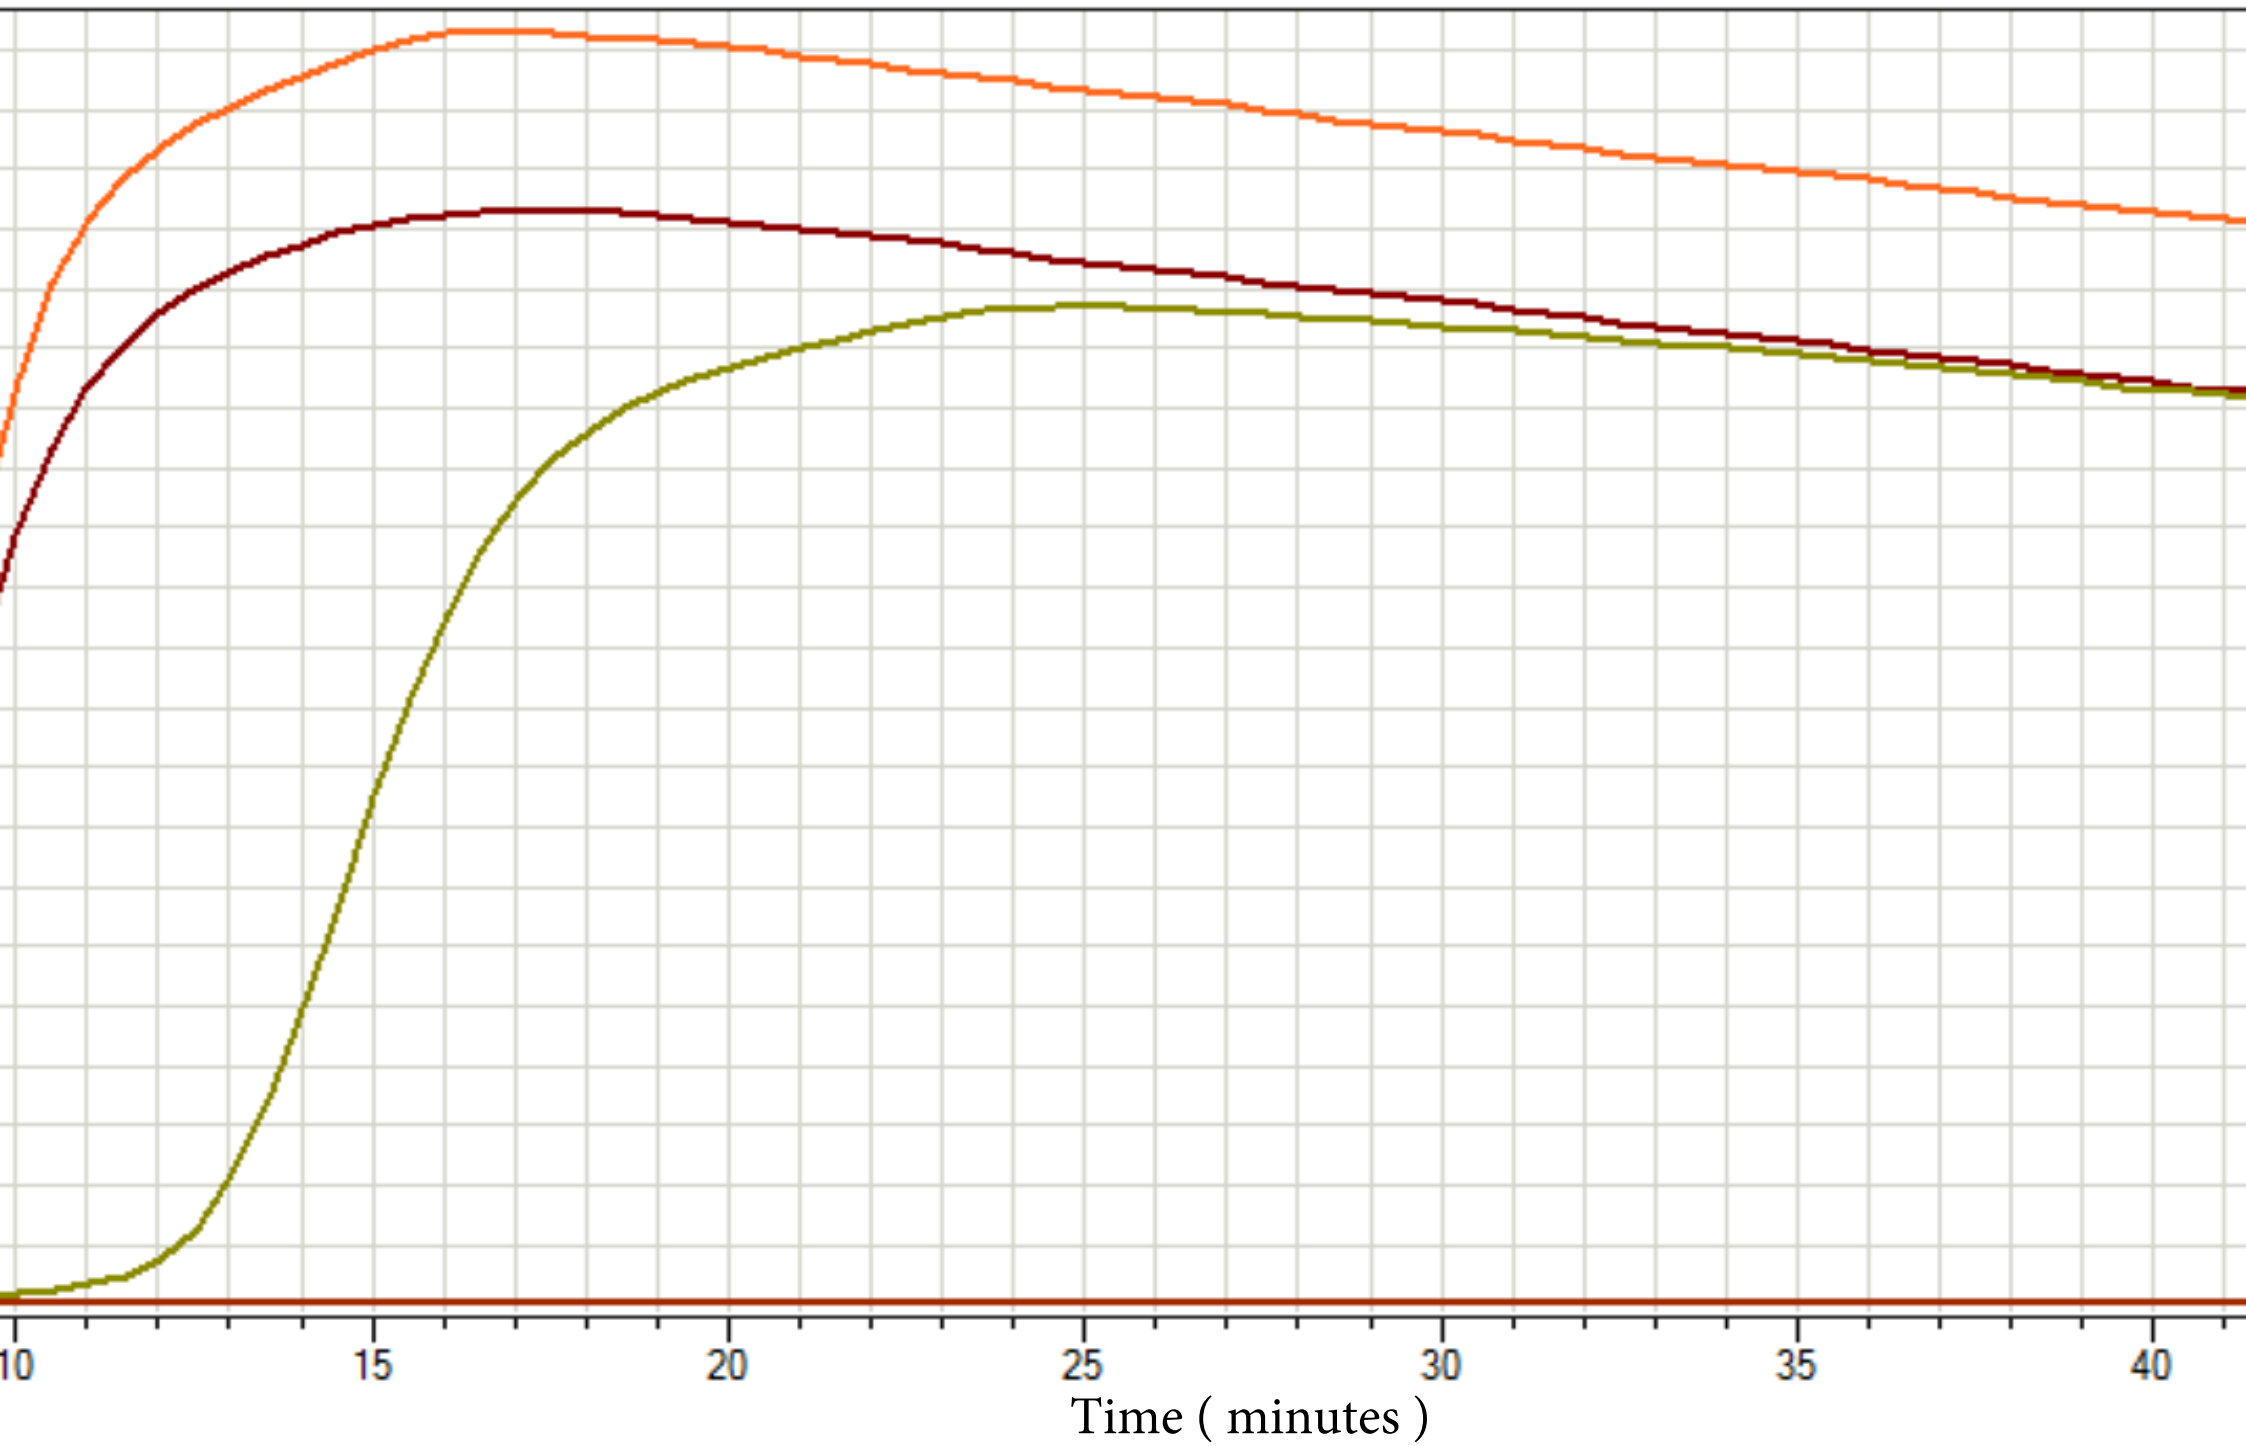

# Algorithm Processing Curve

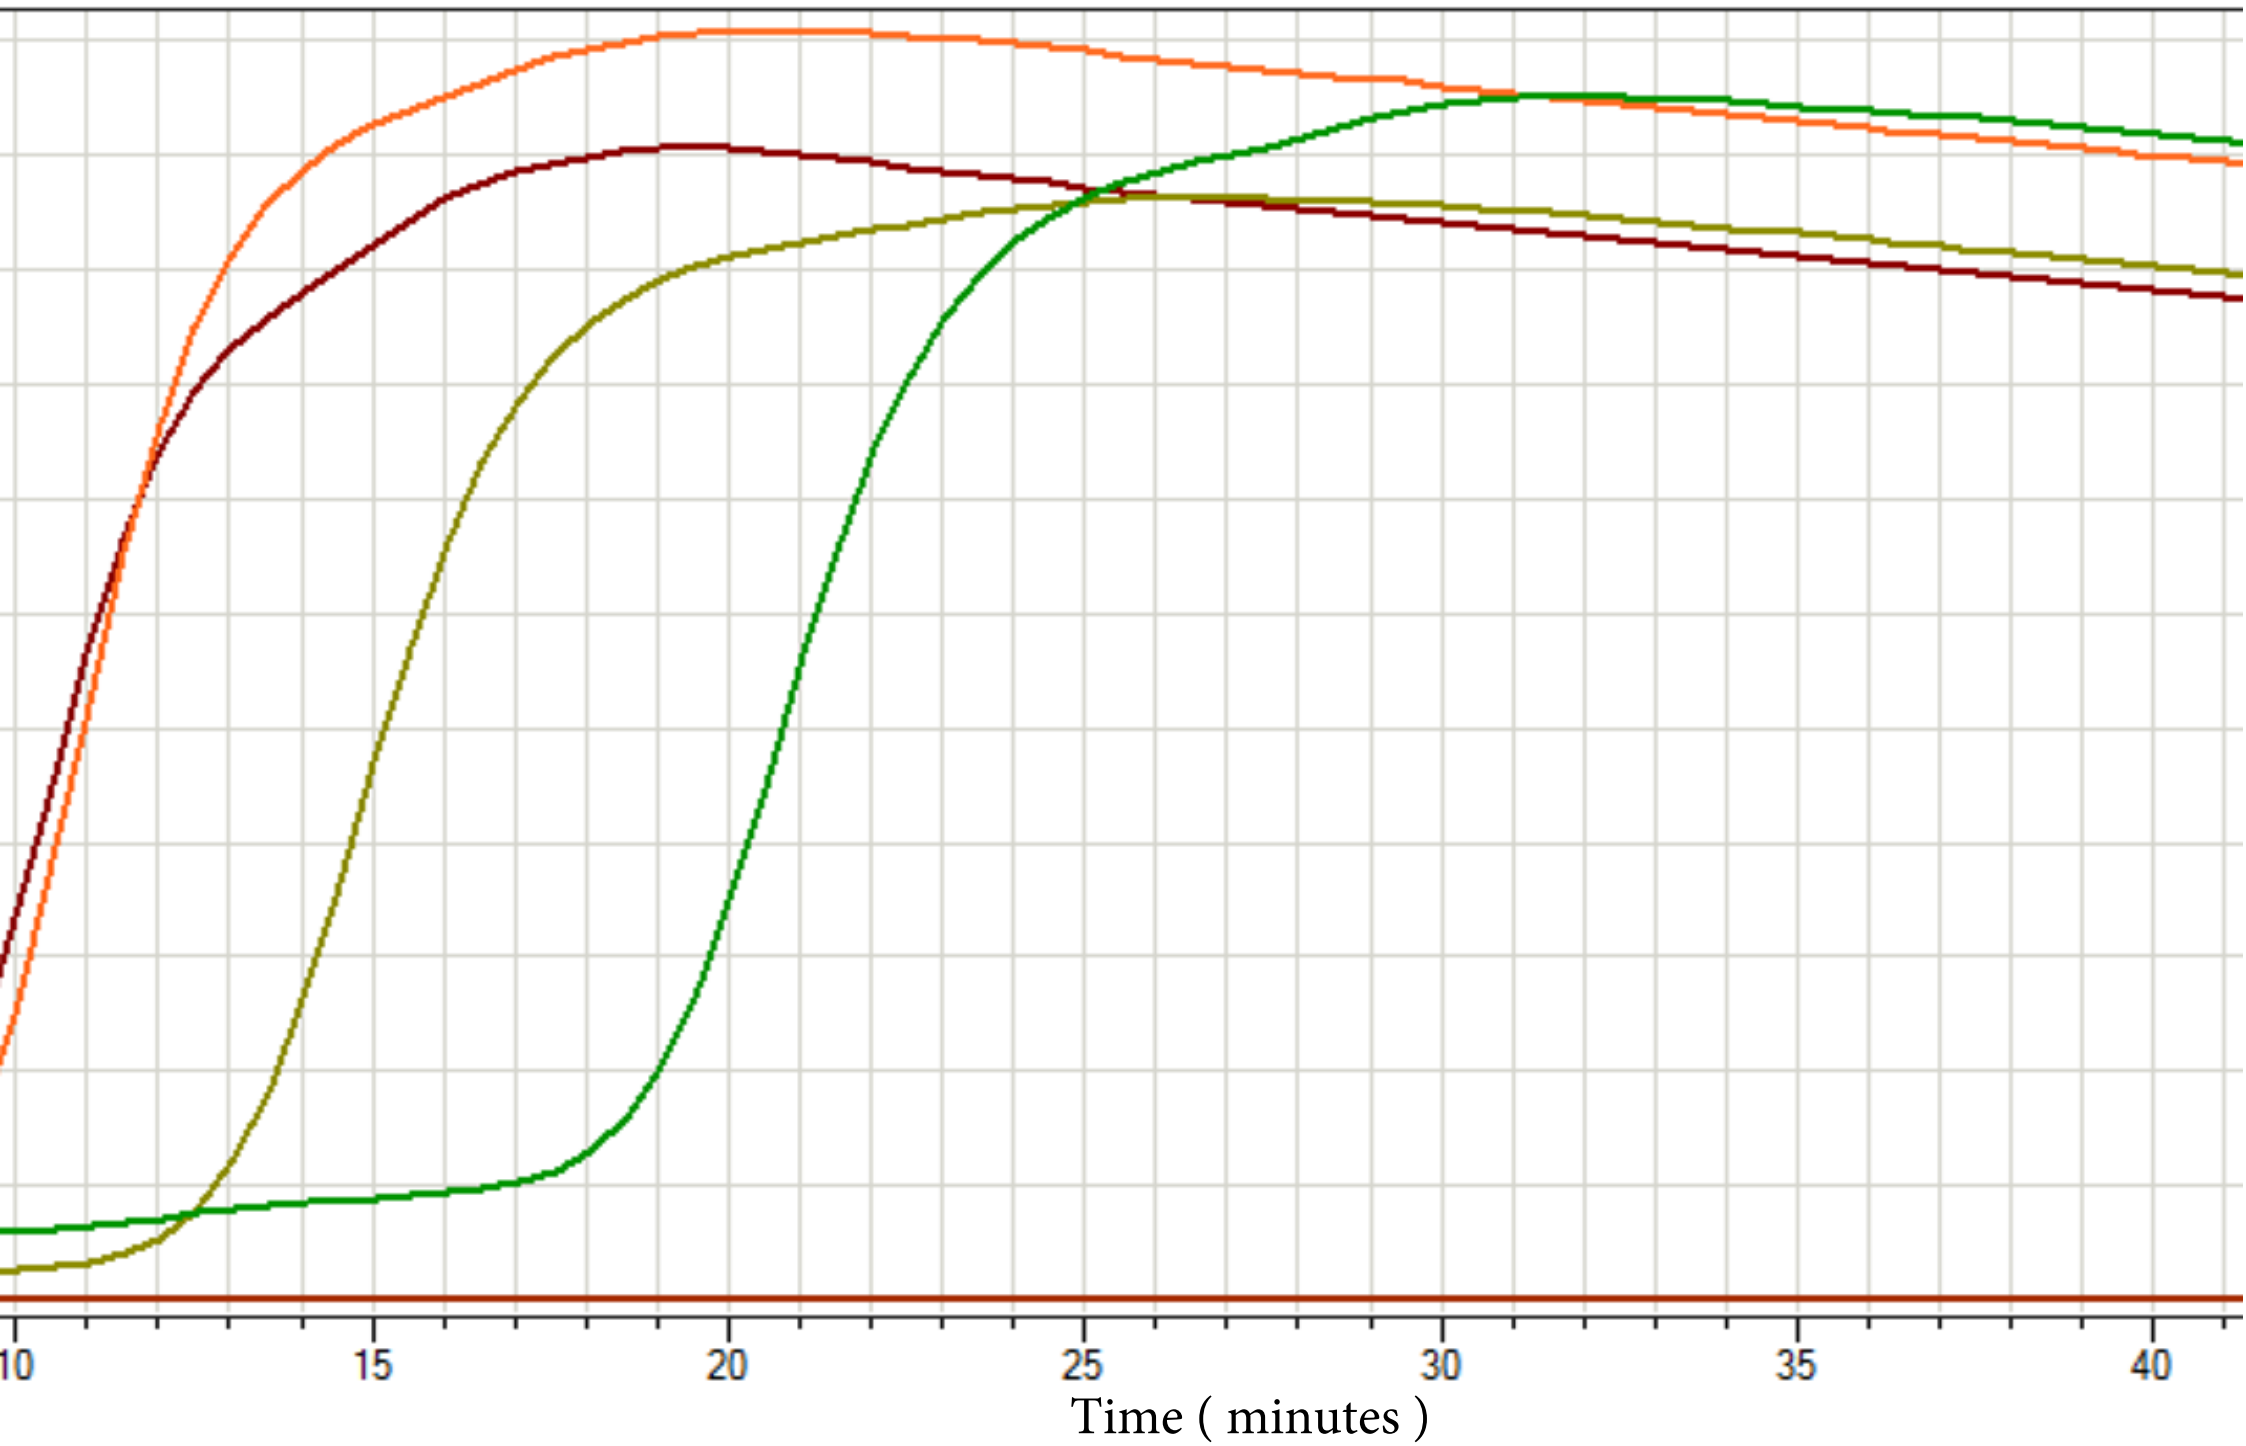

# Algorithm Processing Curve

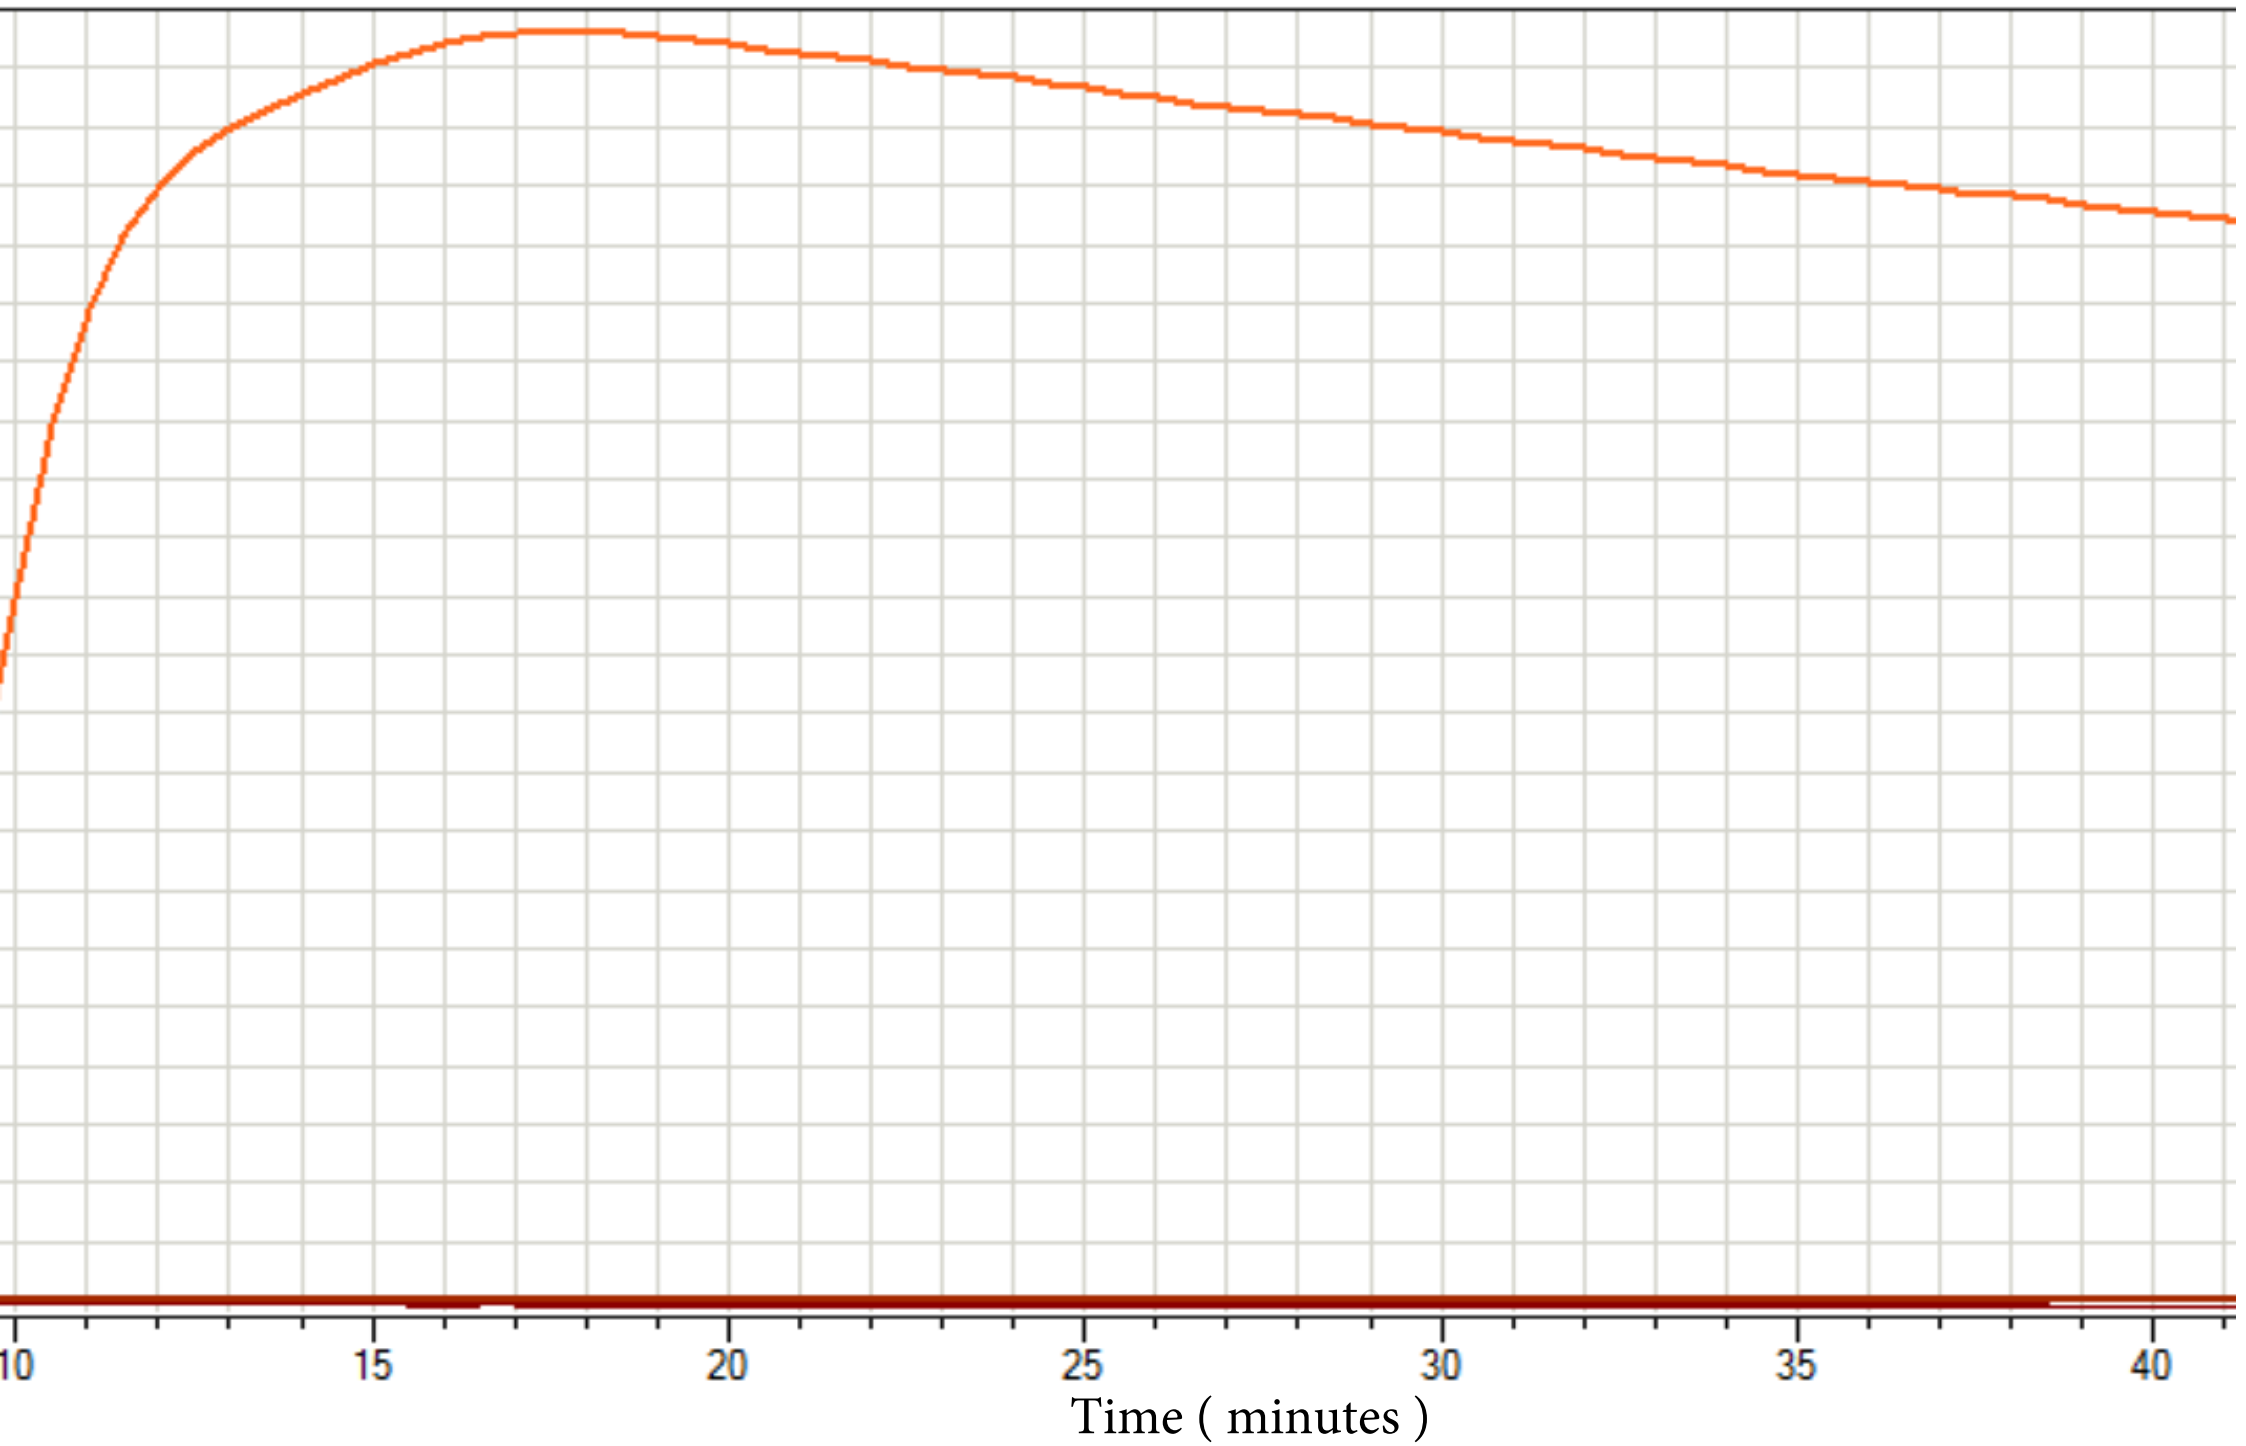

# Algorithm Processing Curve

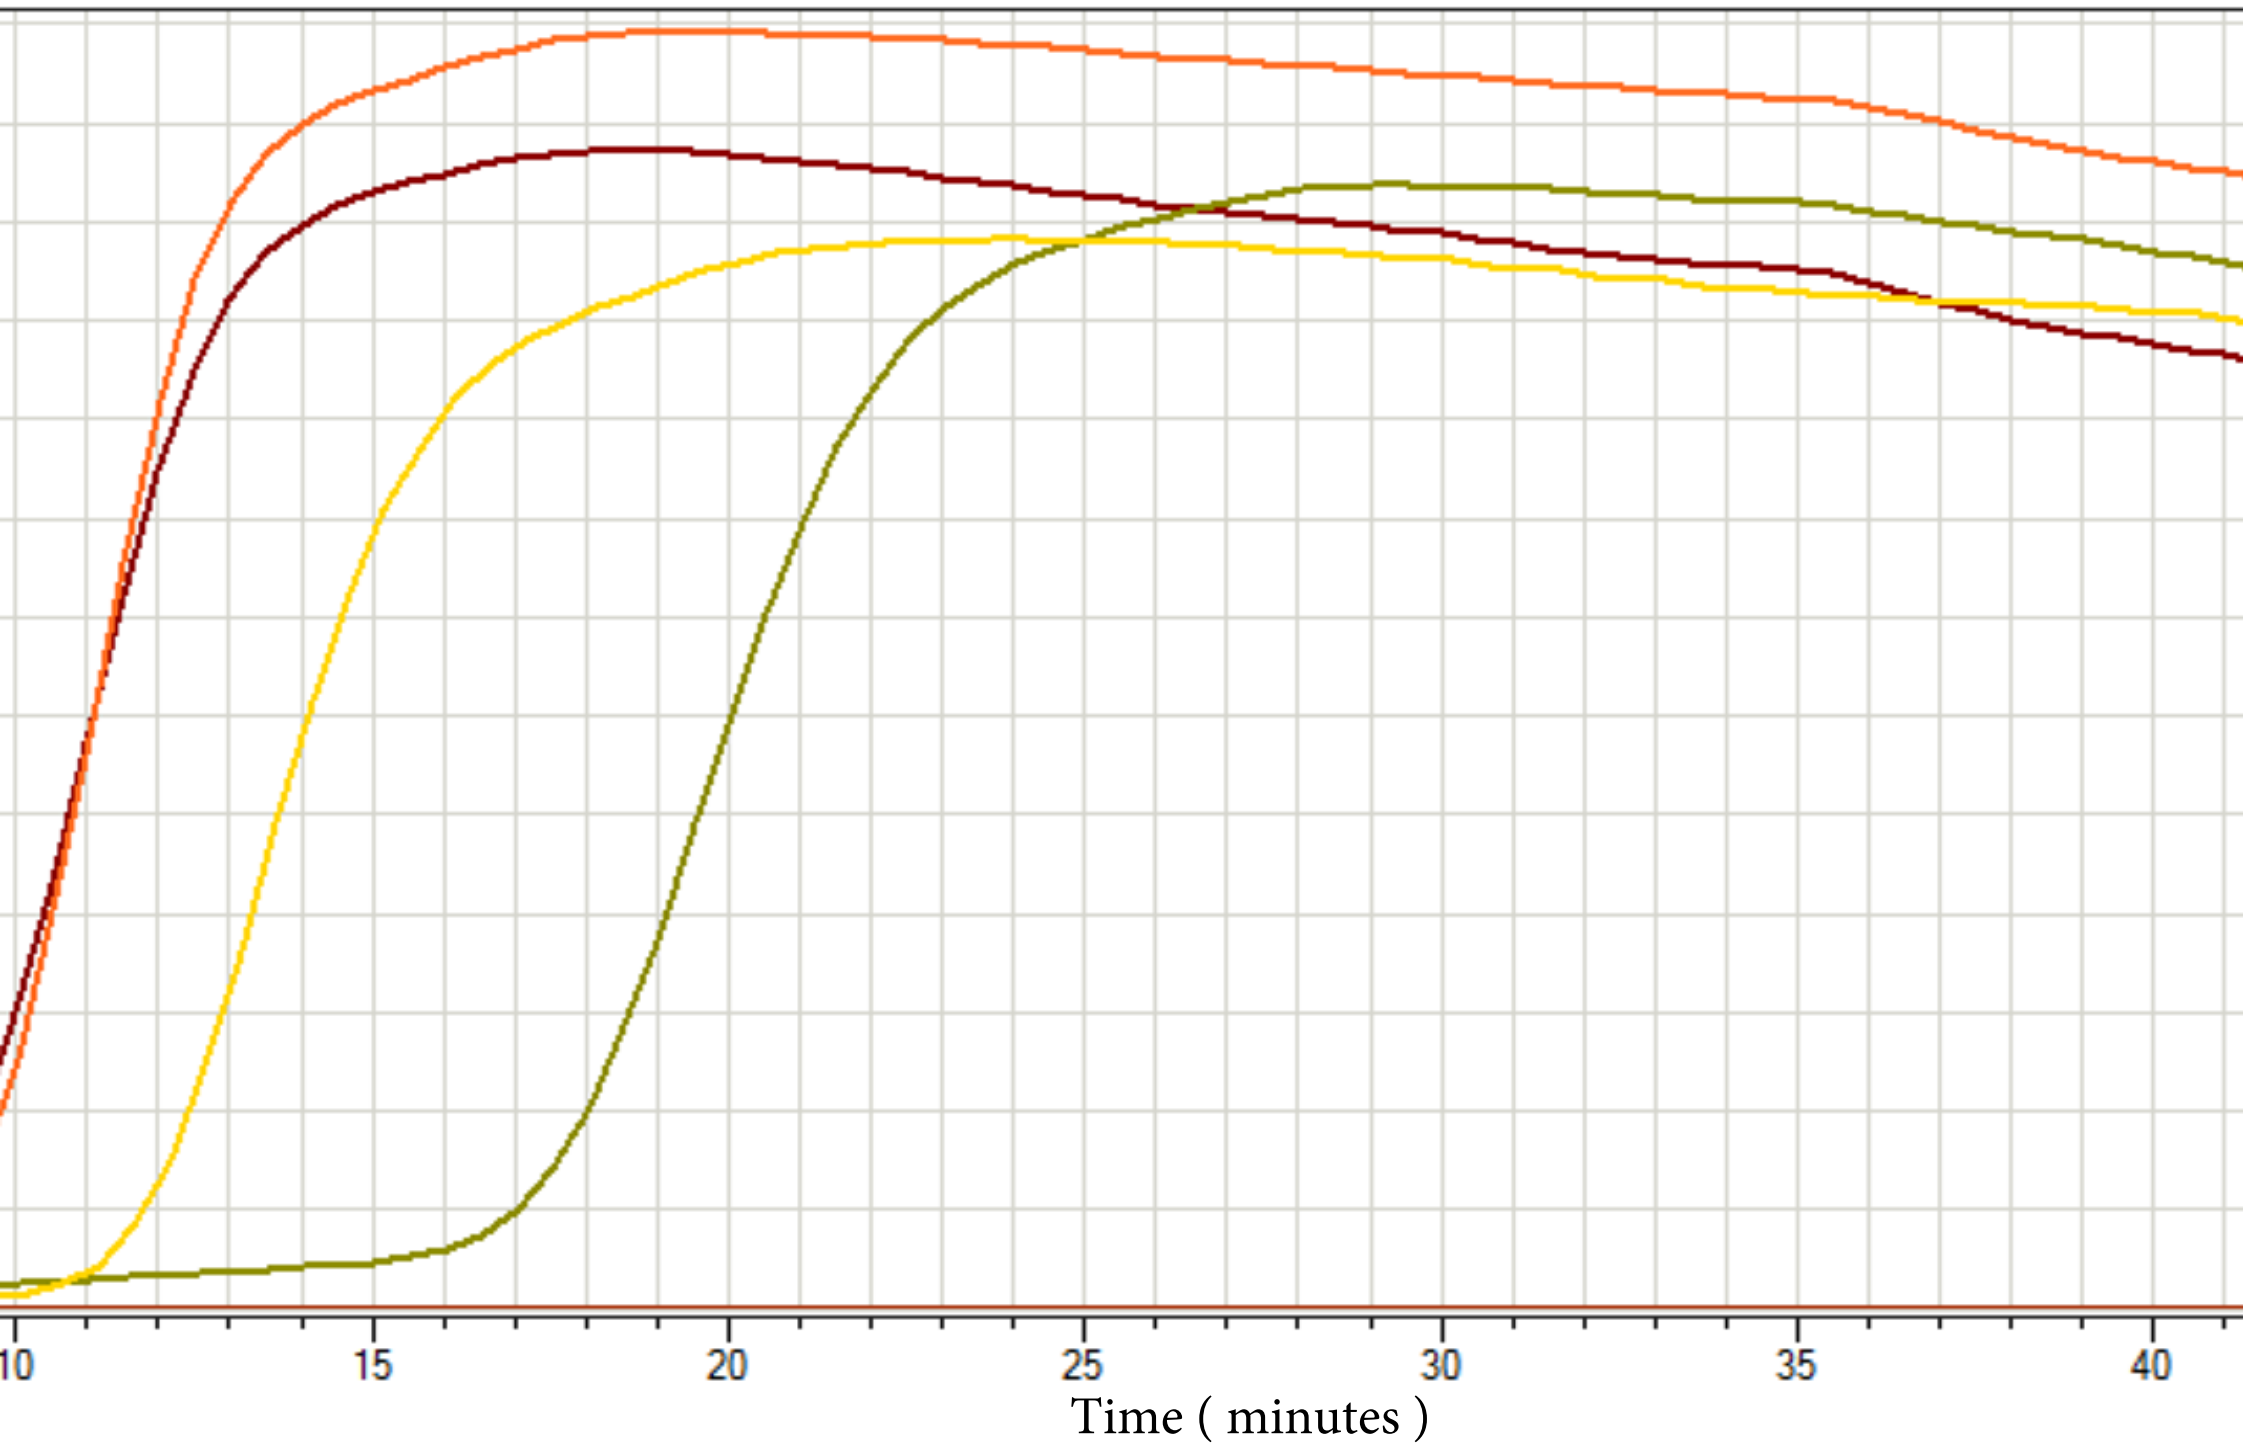

# Algorithm Processing Curve

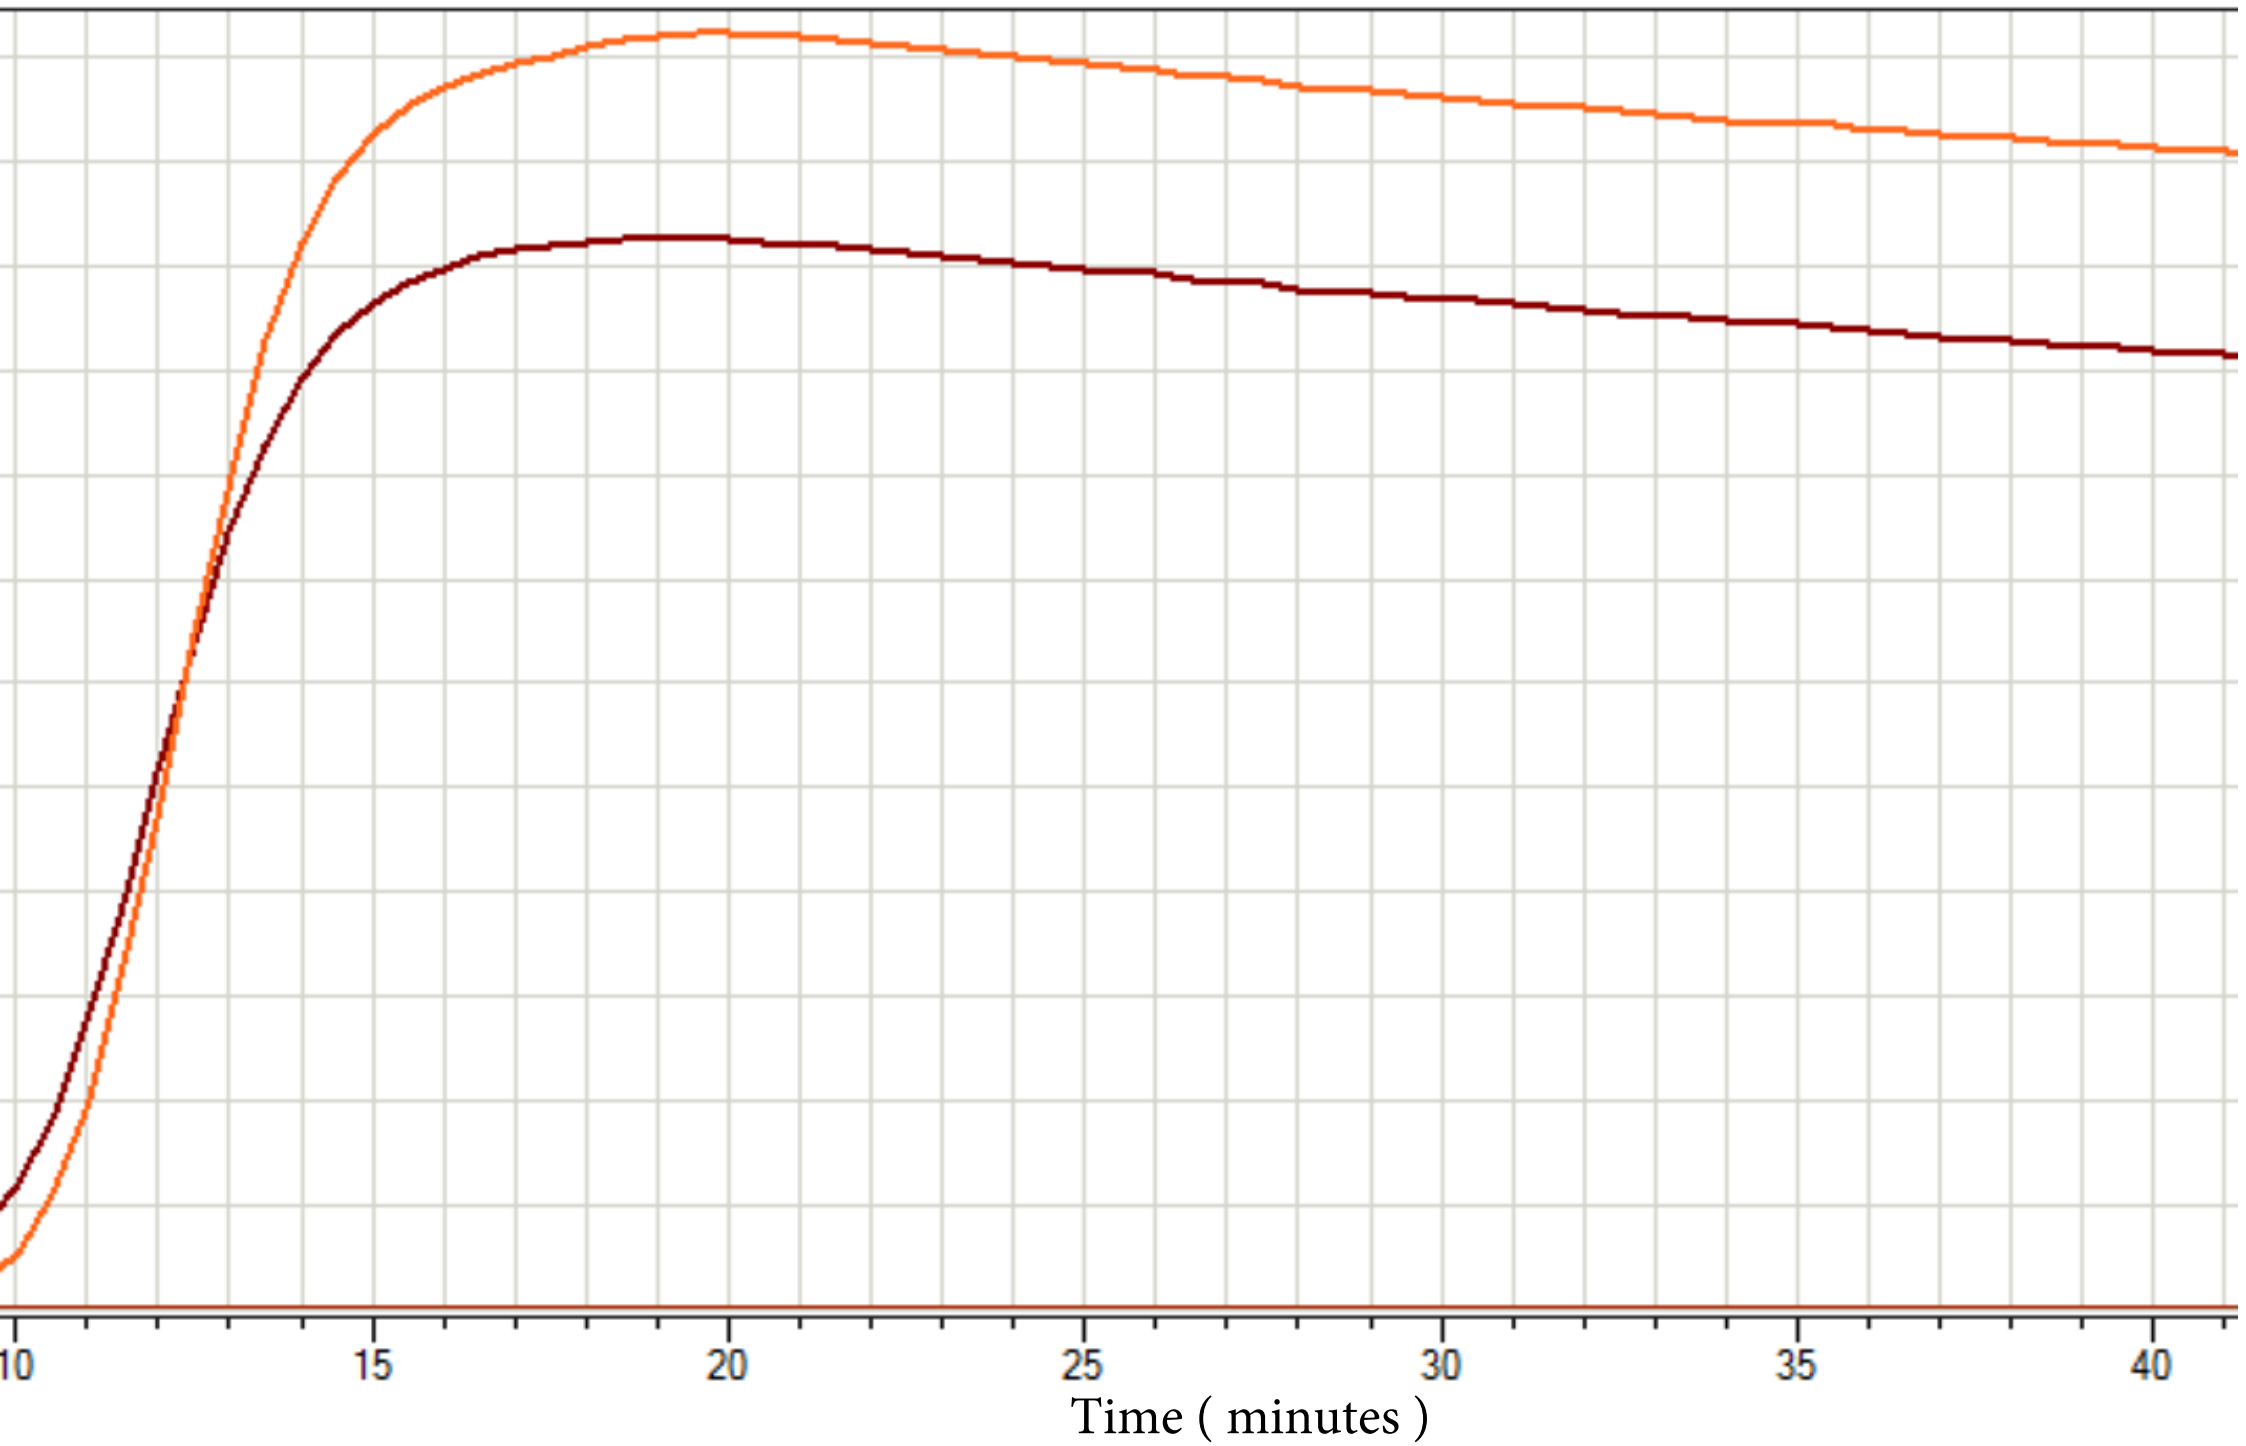

# Algorithm Processing Curve

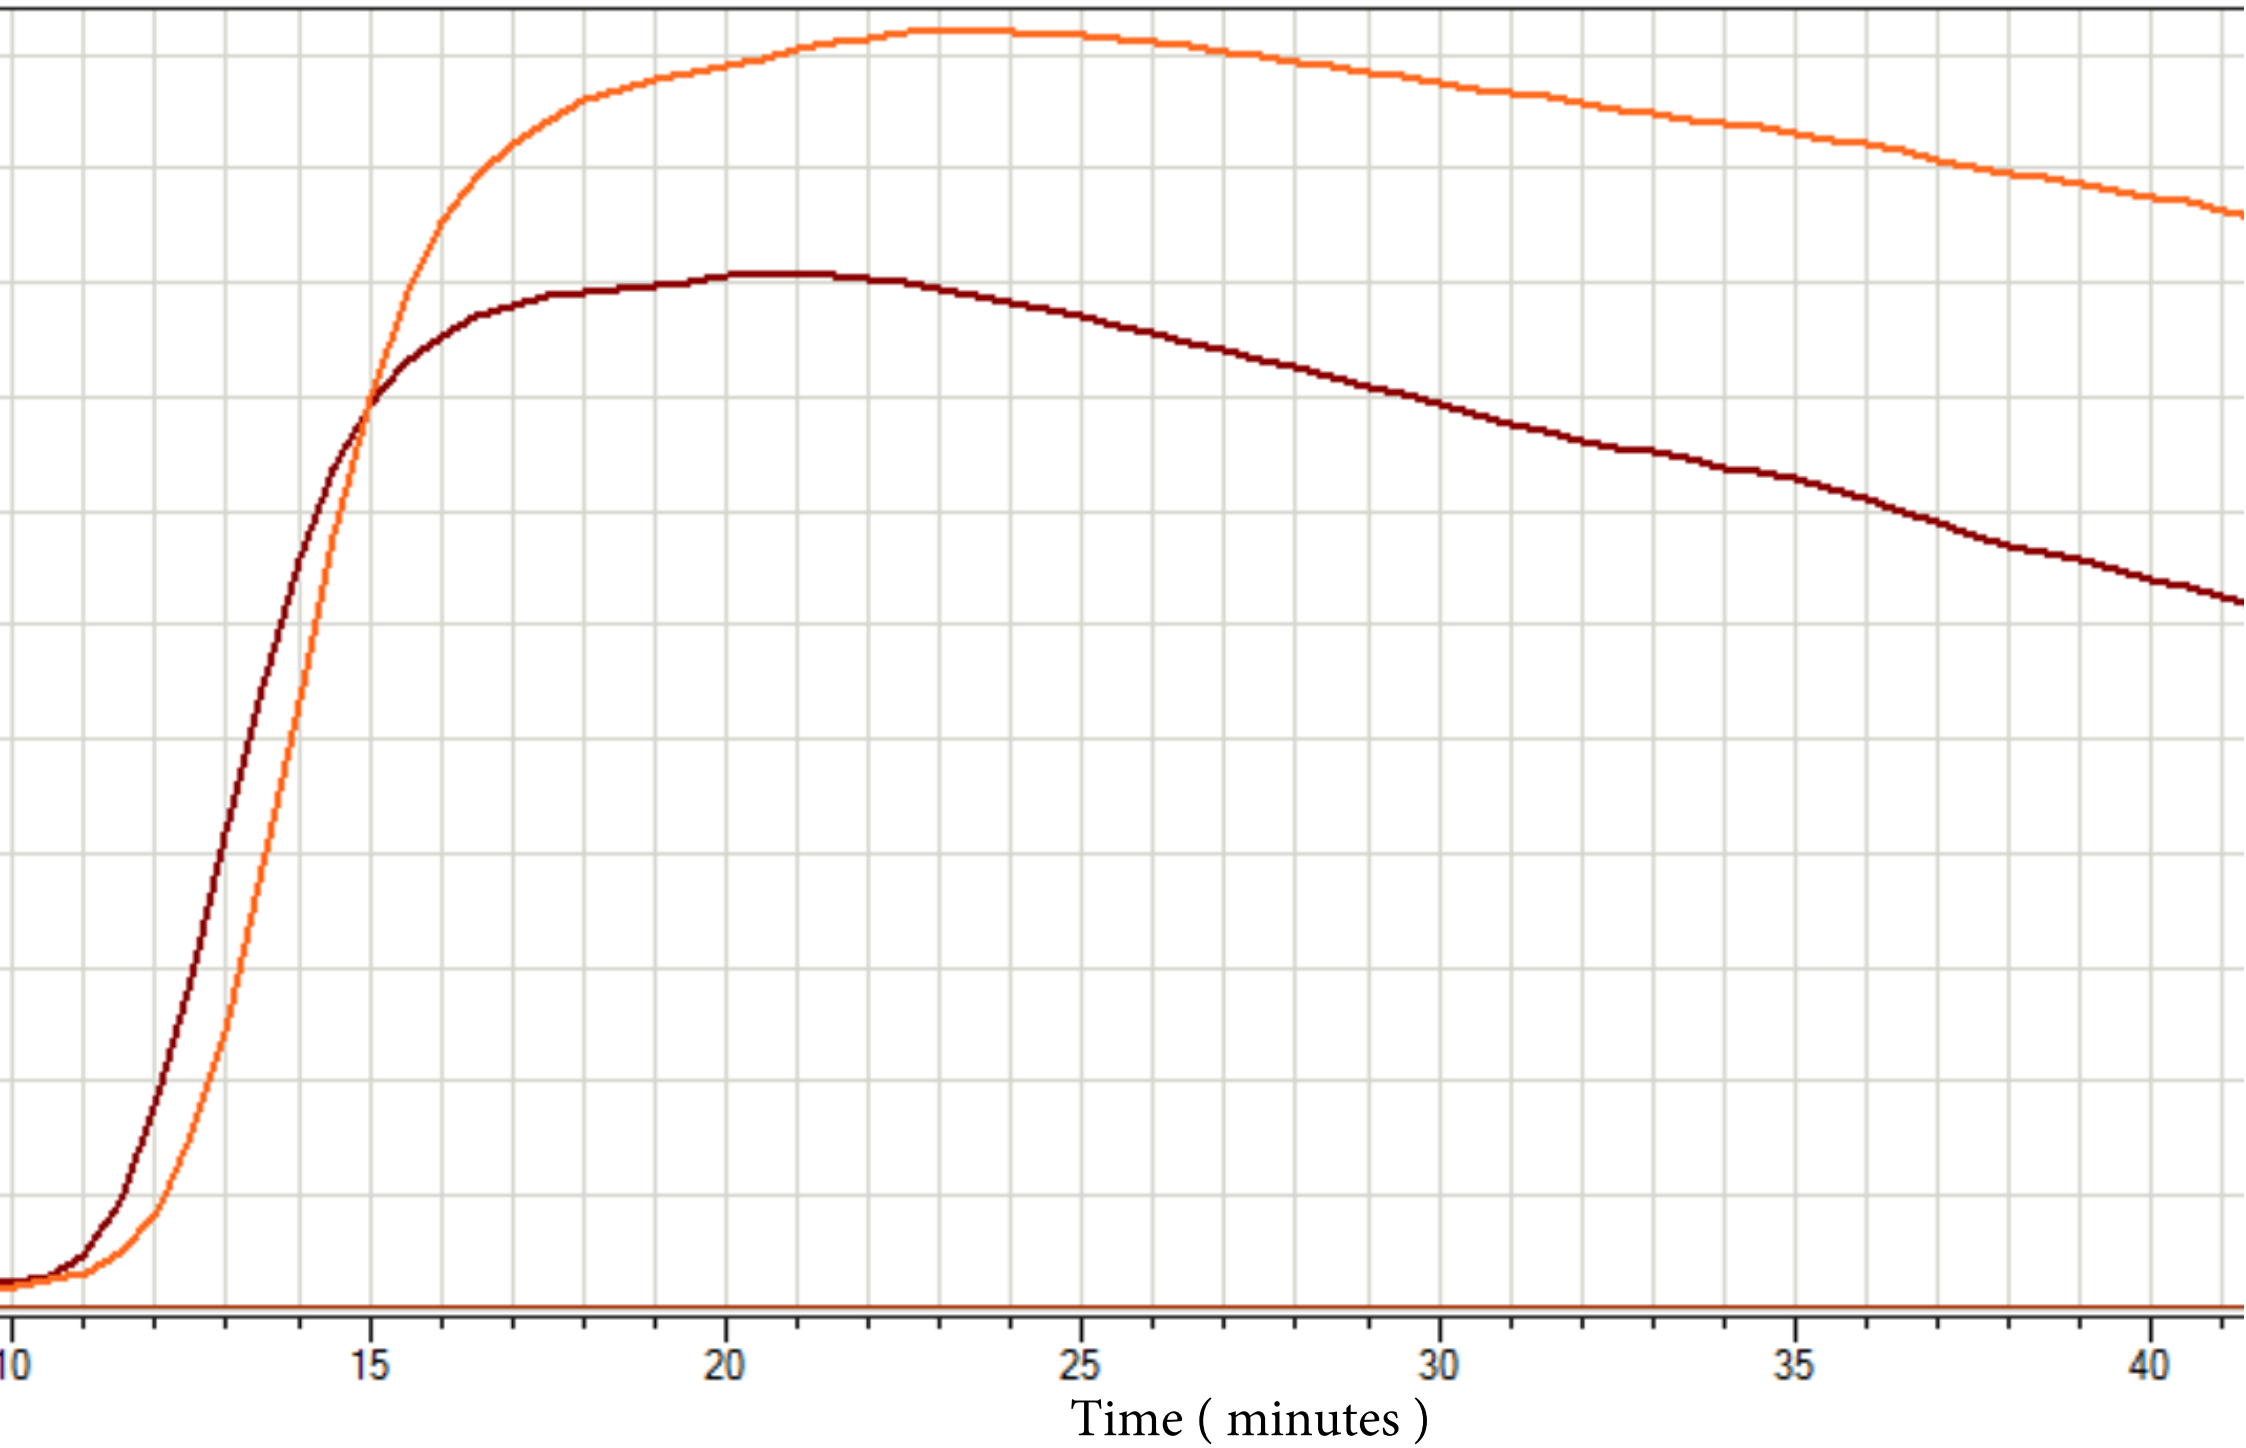



# Algorithm Processing Curve

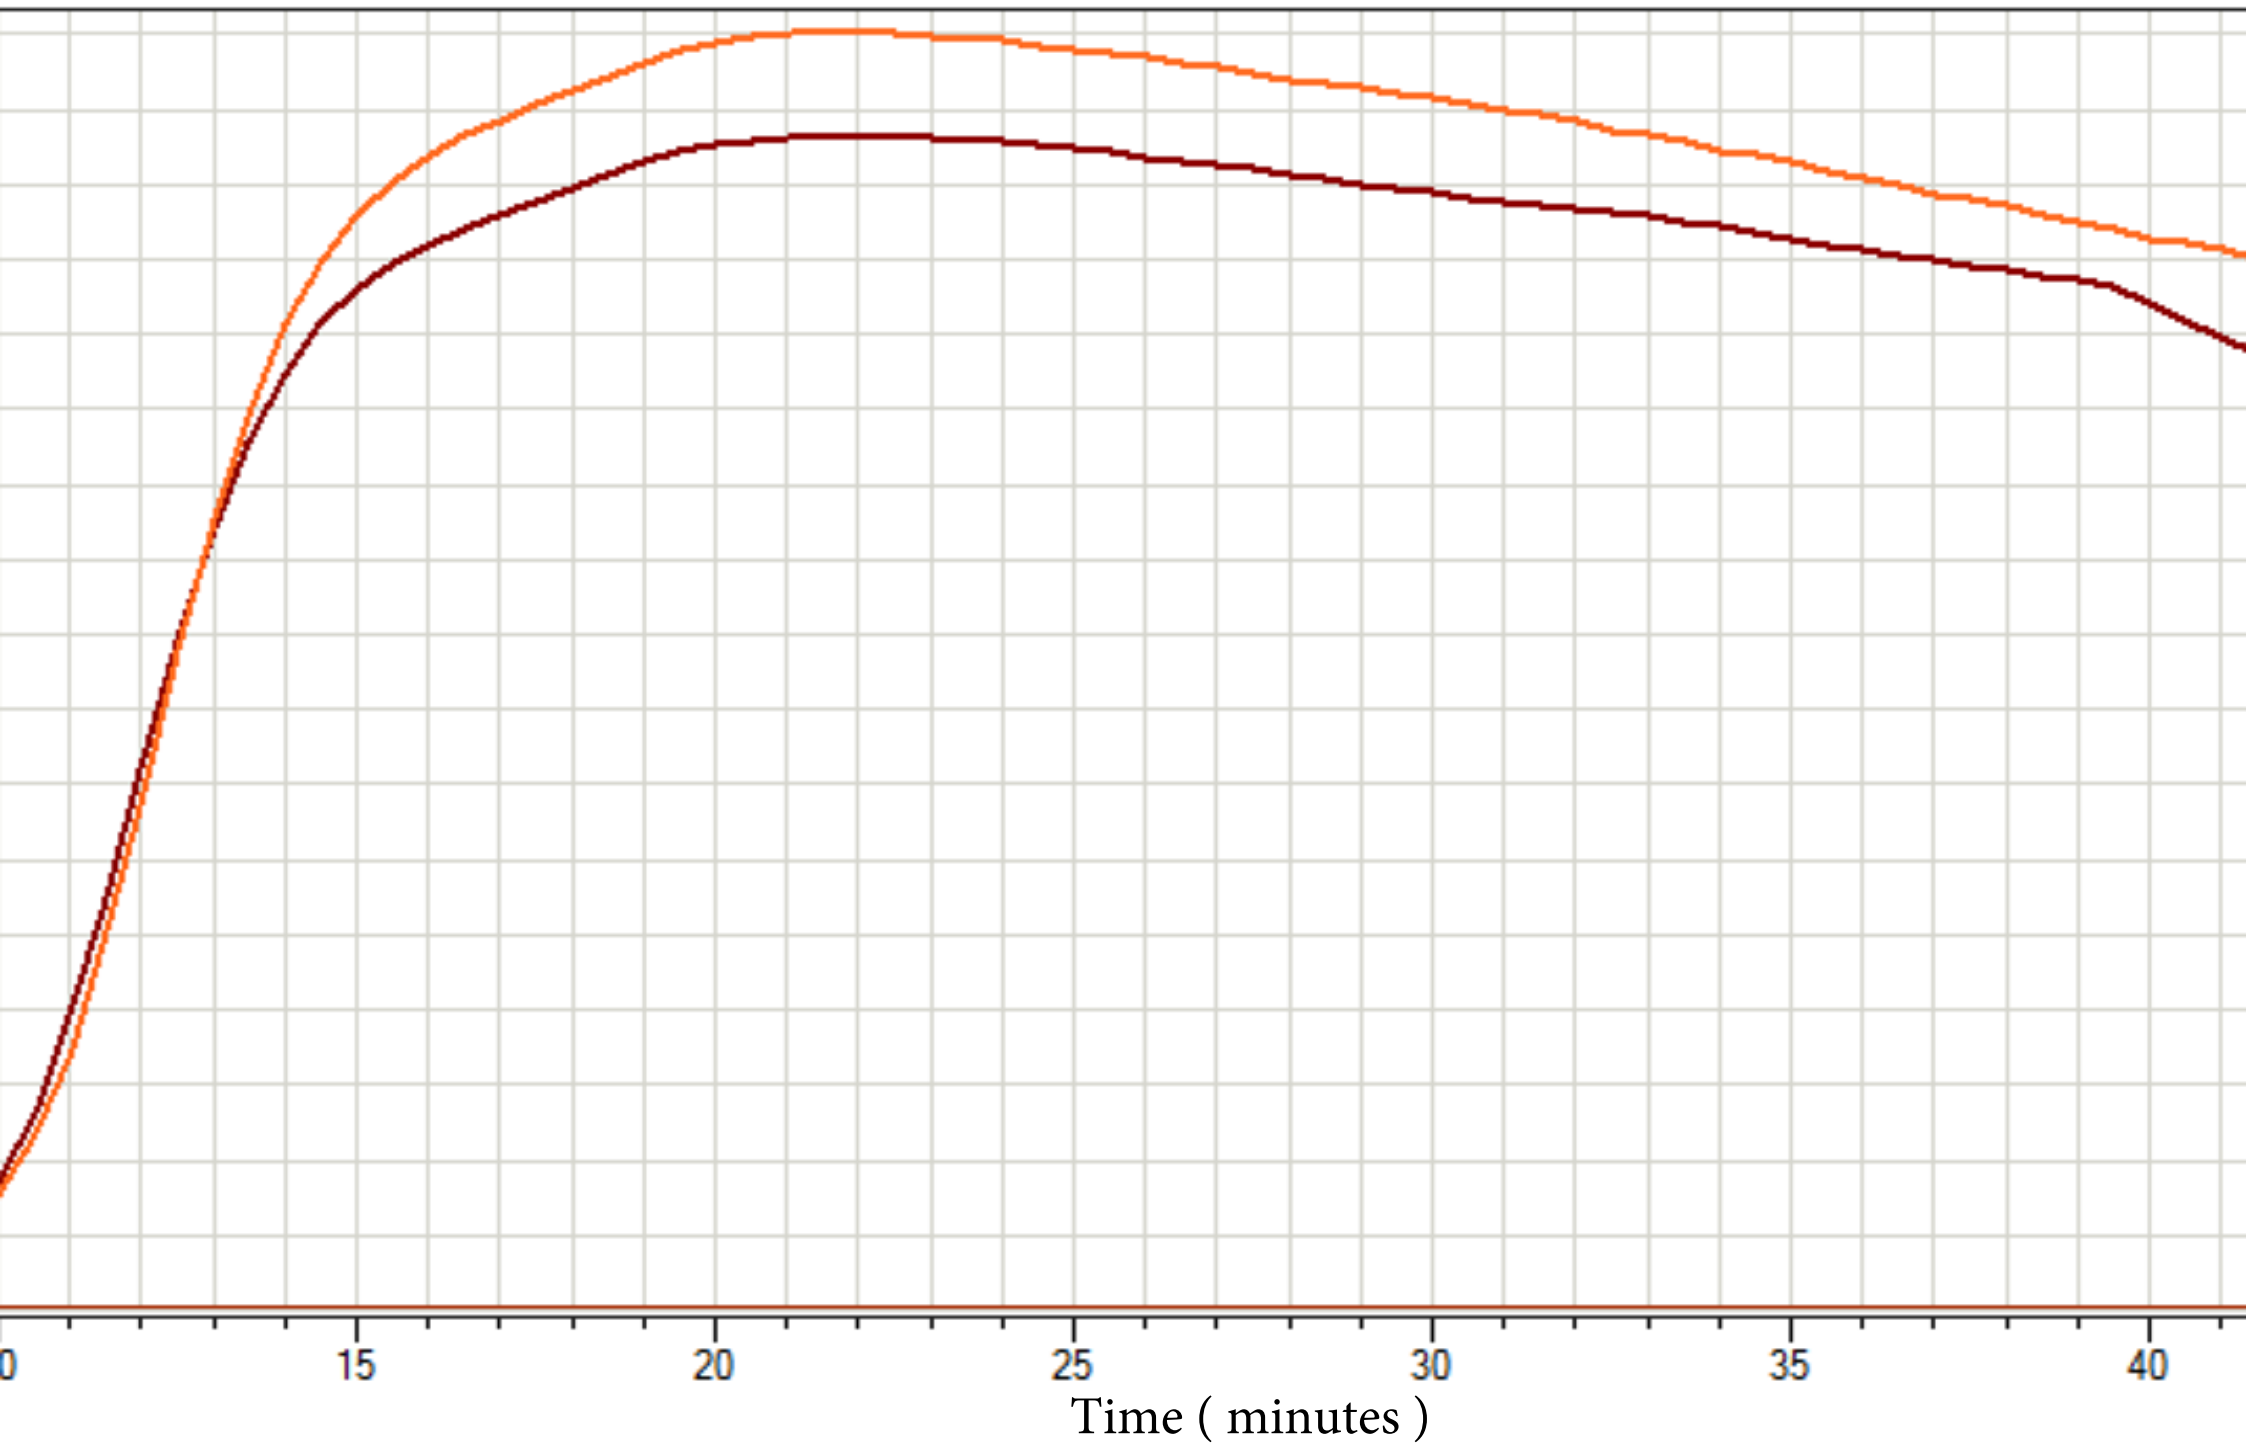

# Algorithm Processing Curve

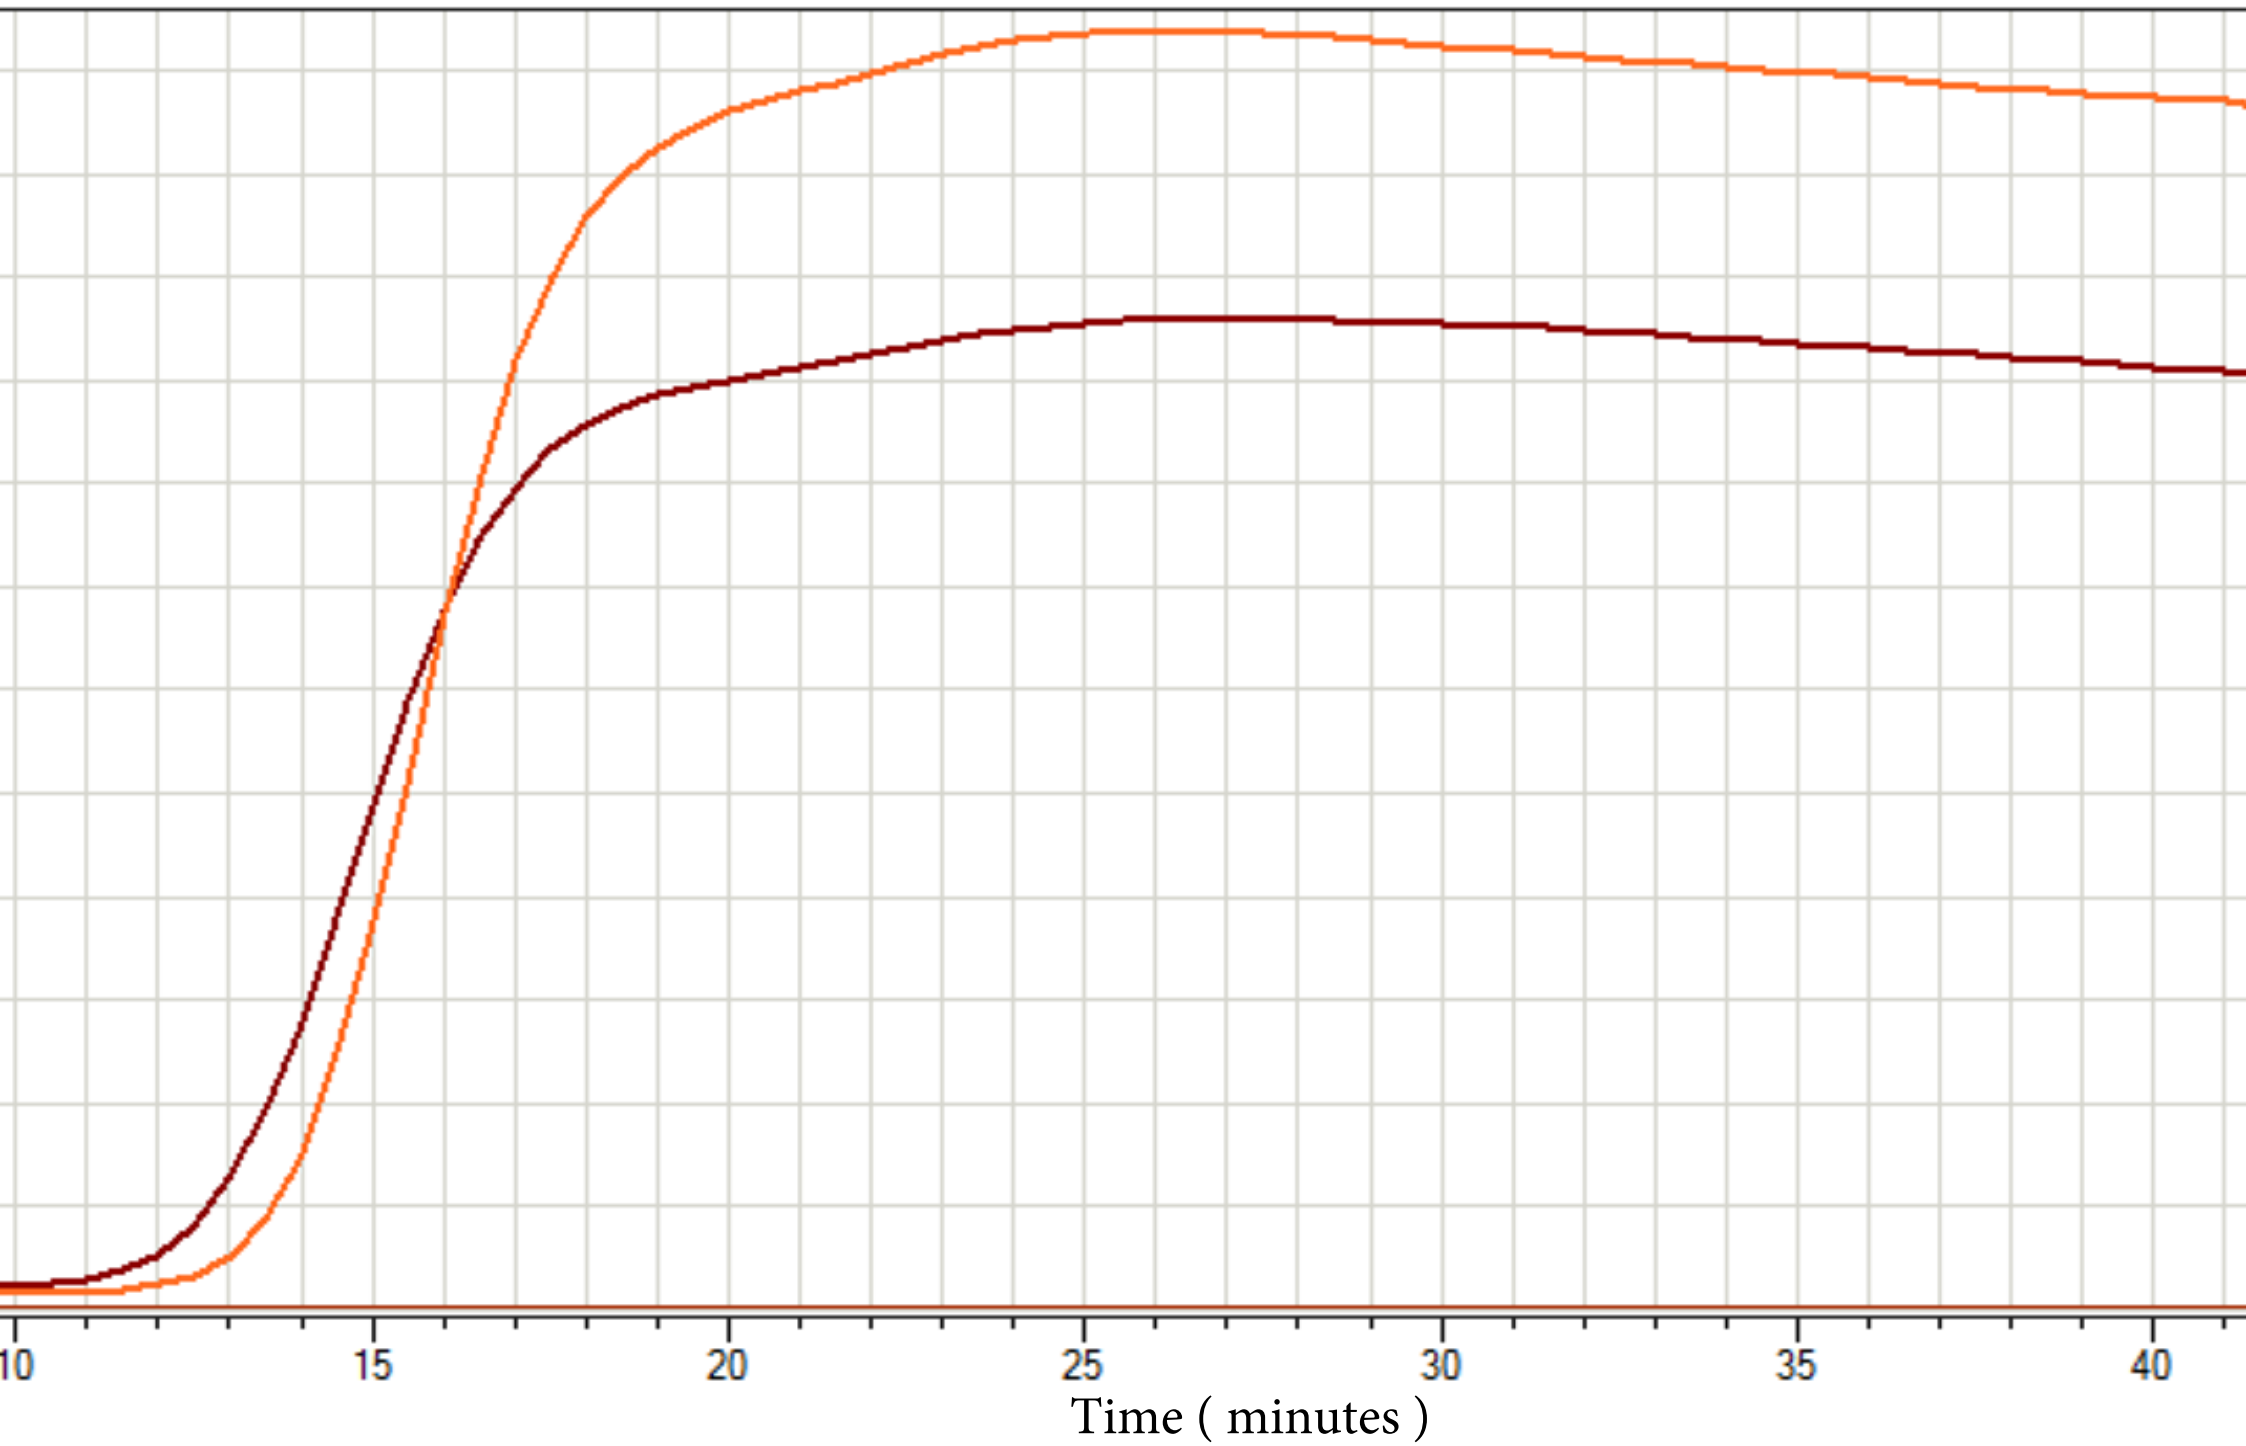

# Algorithm Processing Curve

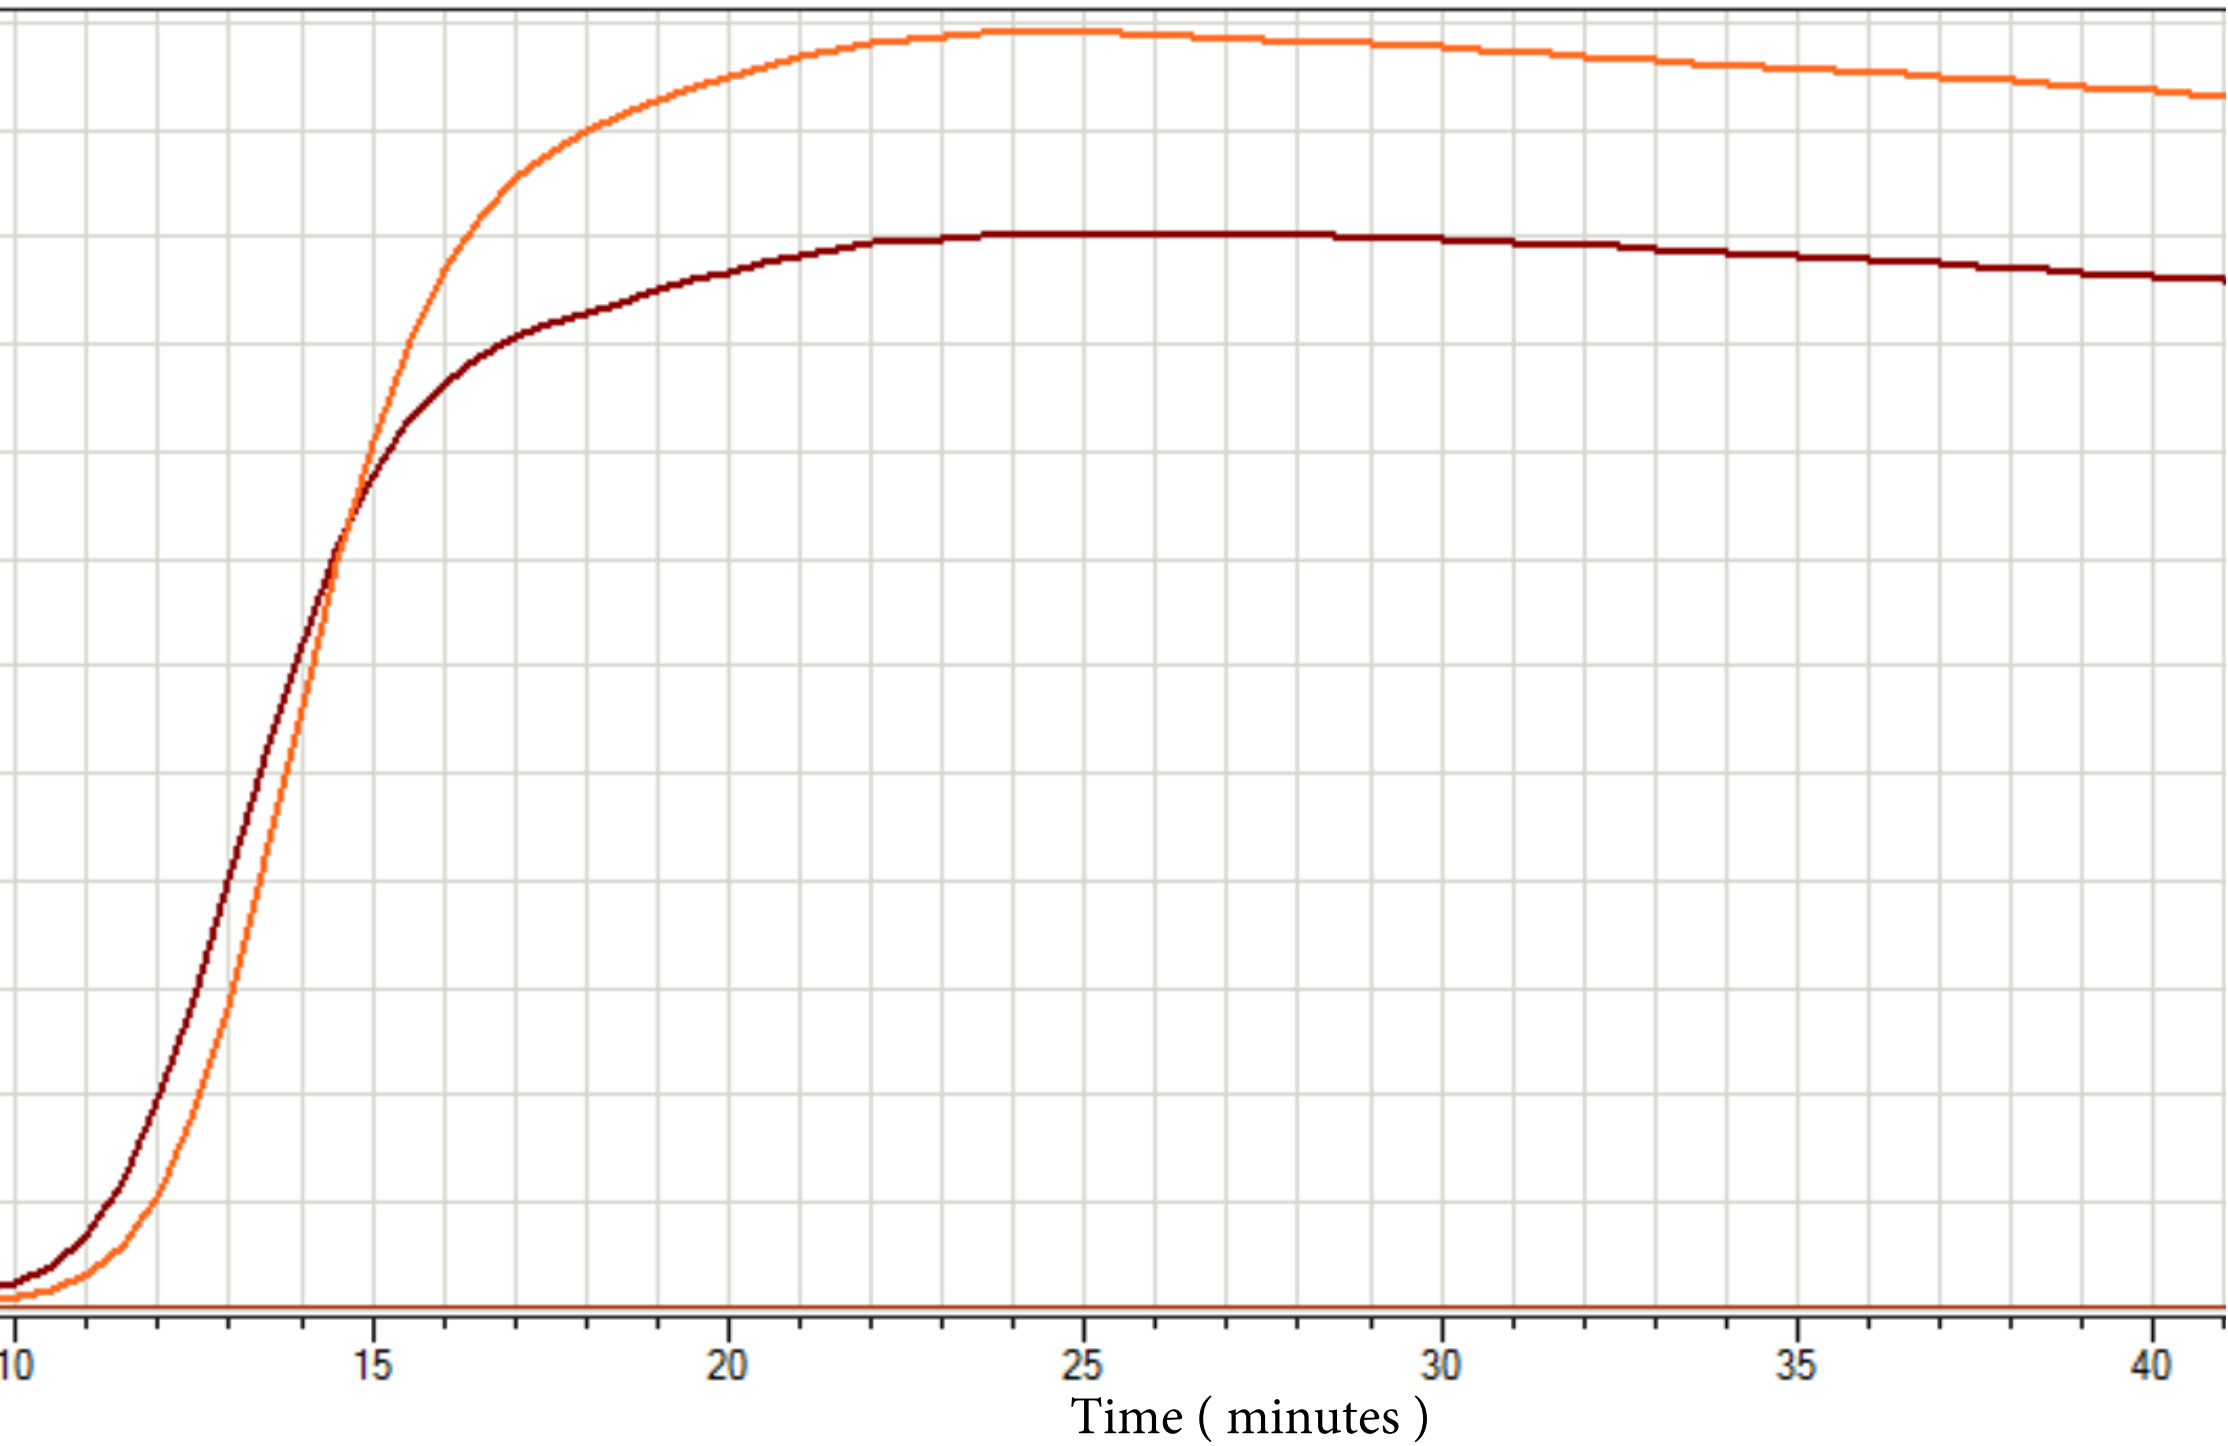

# Algorithm Processing Curve

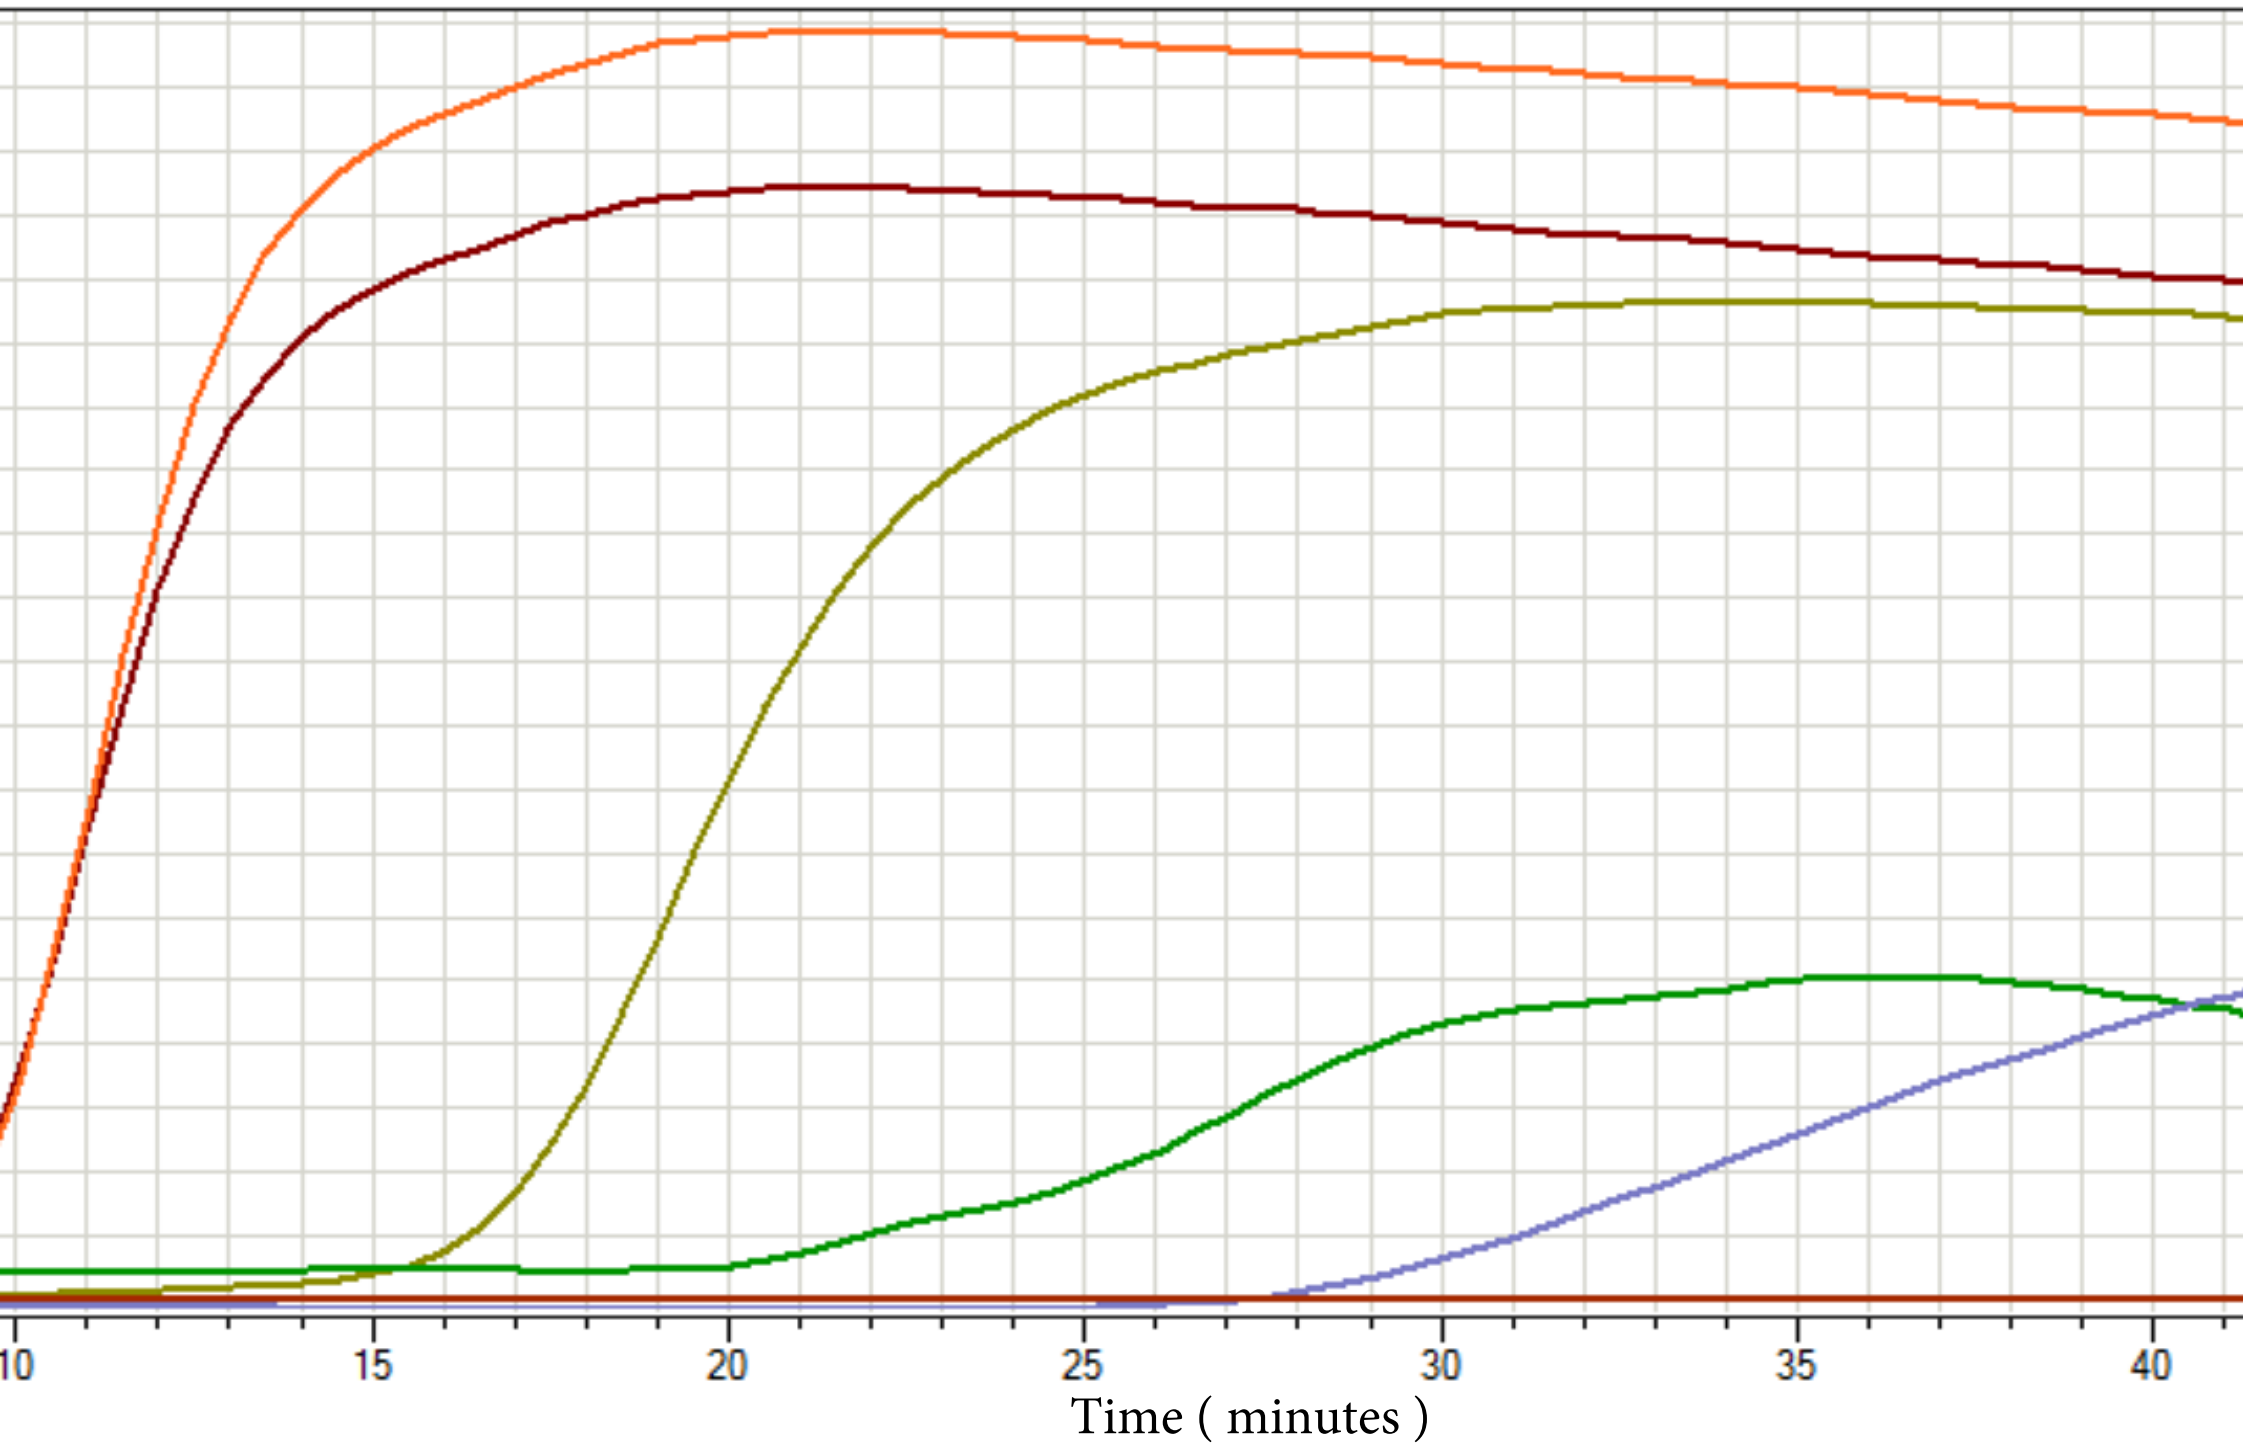

# Algorithm Processing Curve

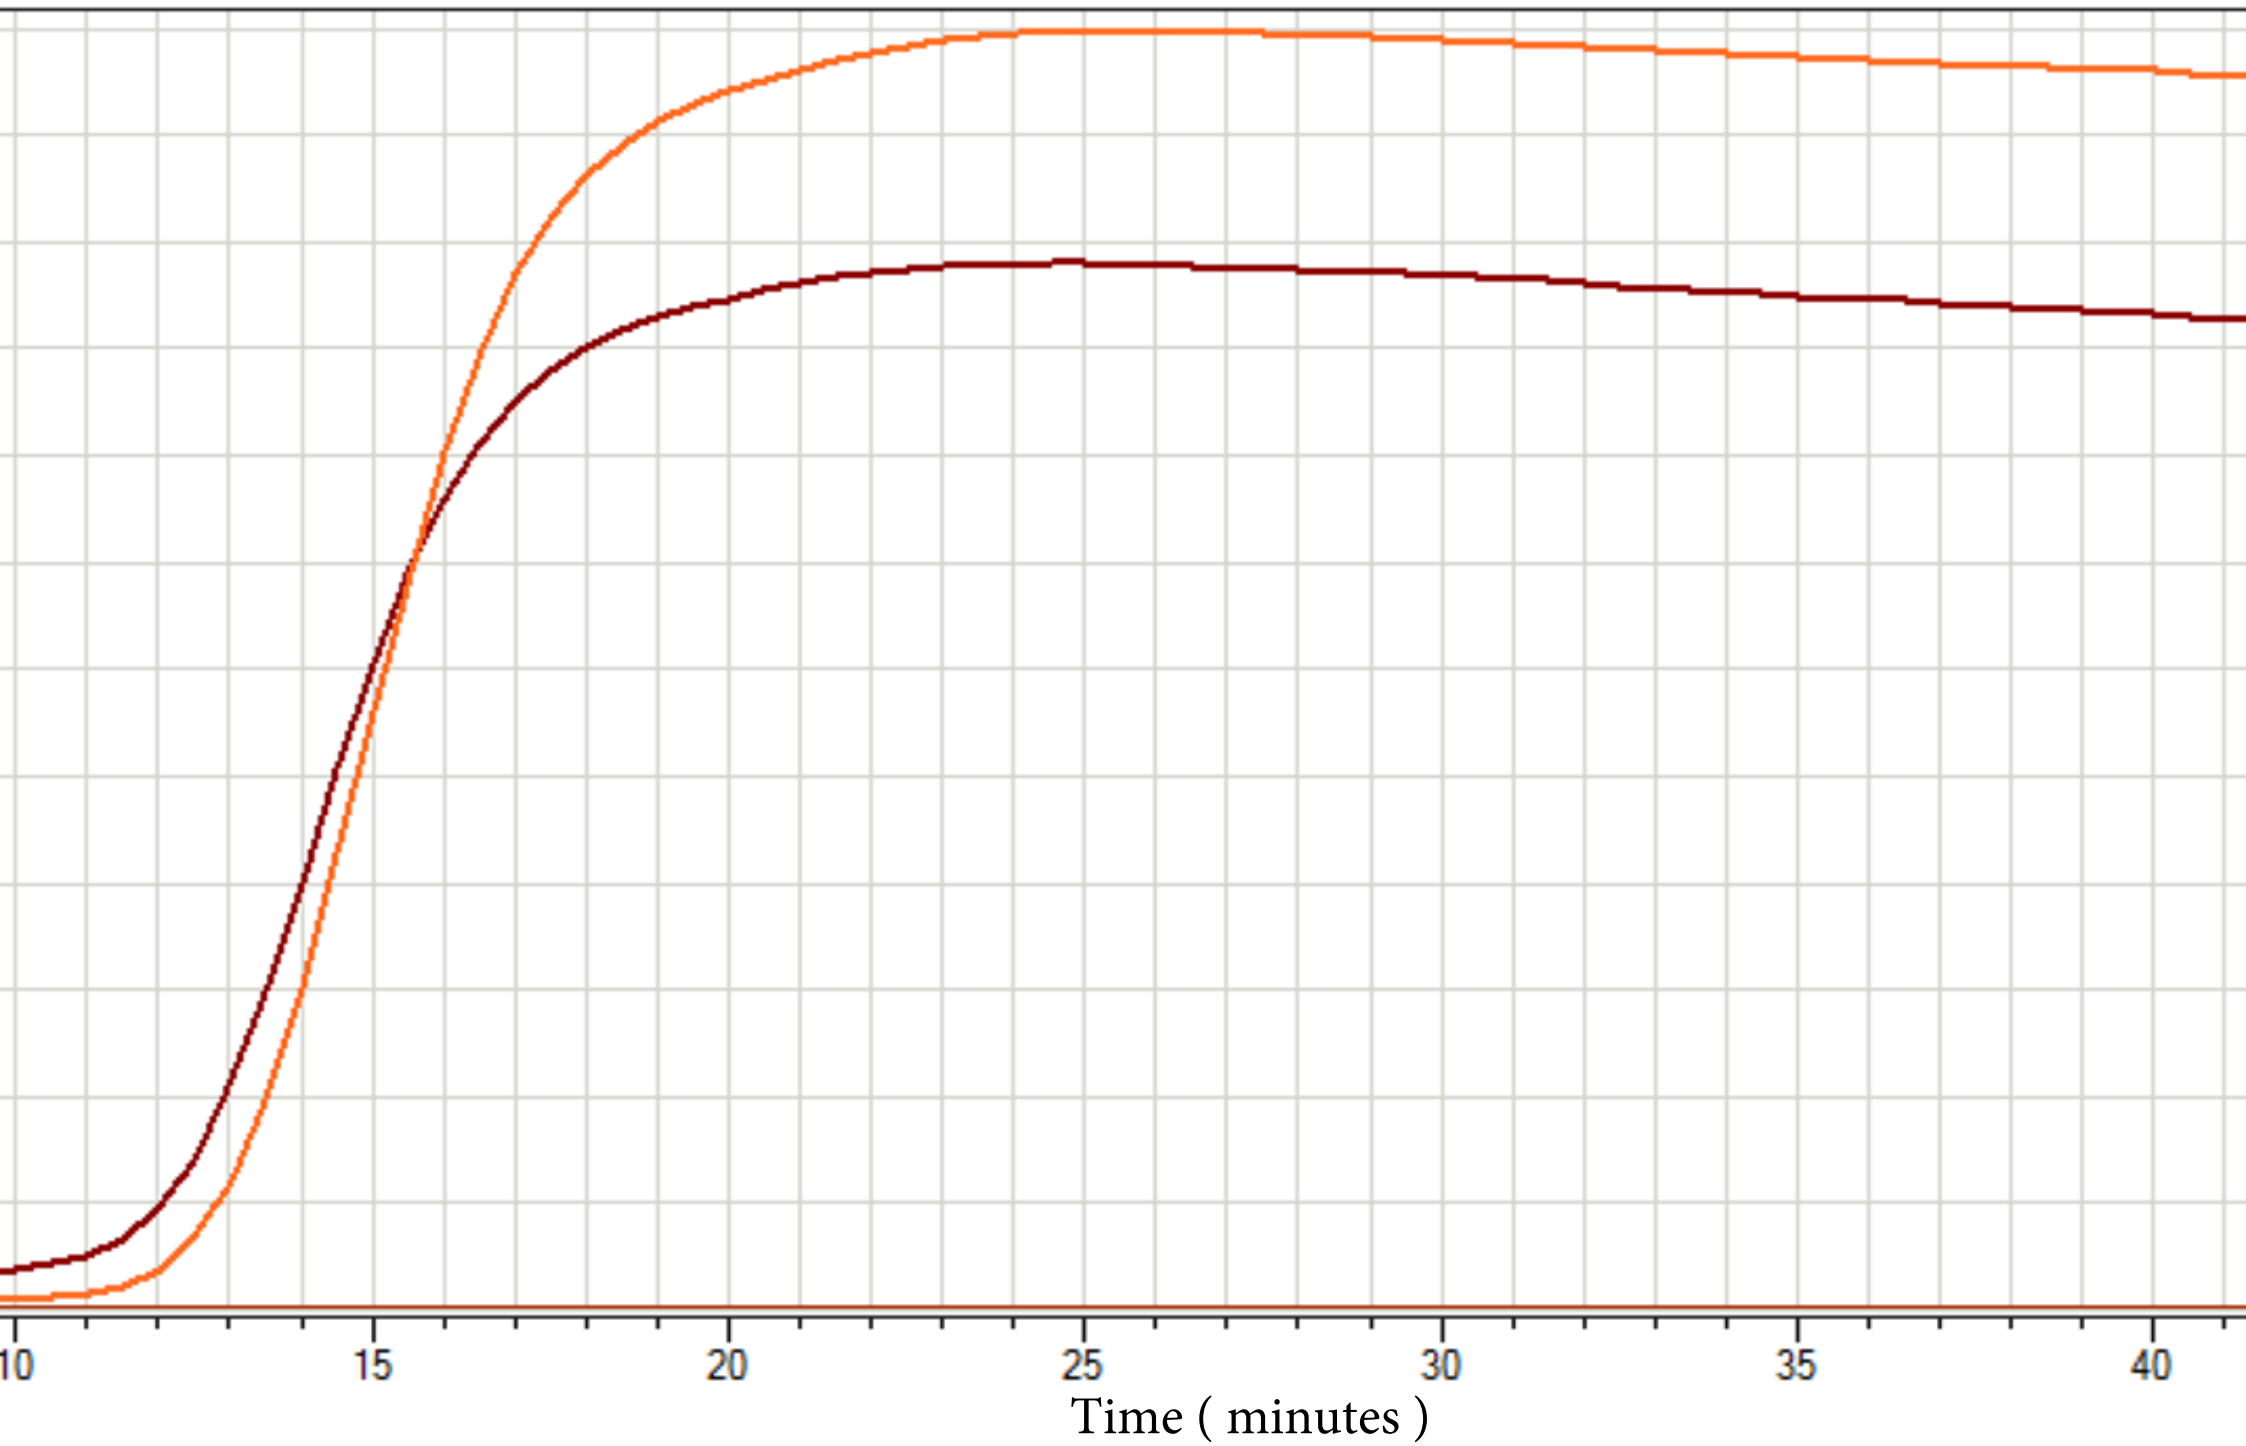

# Algorithm Processing Curve

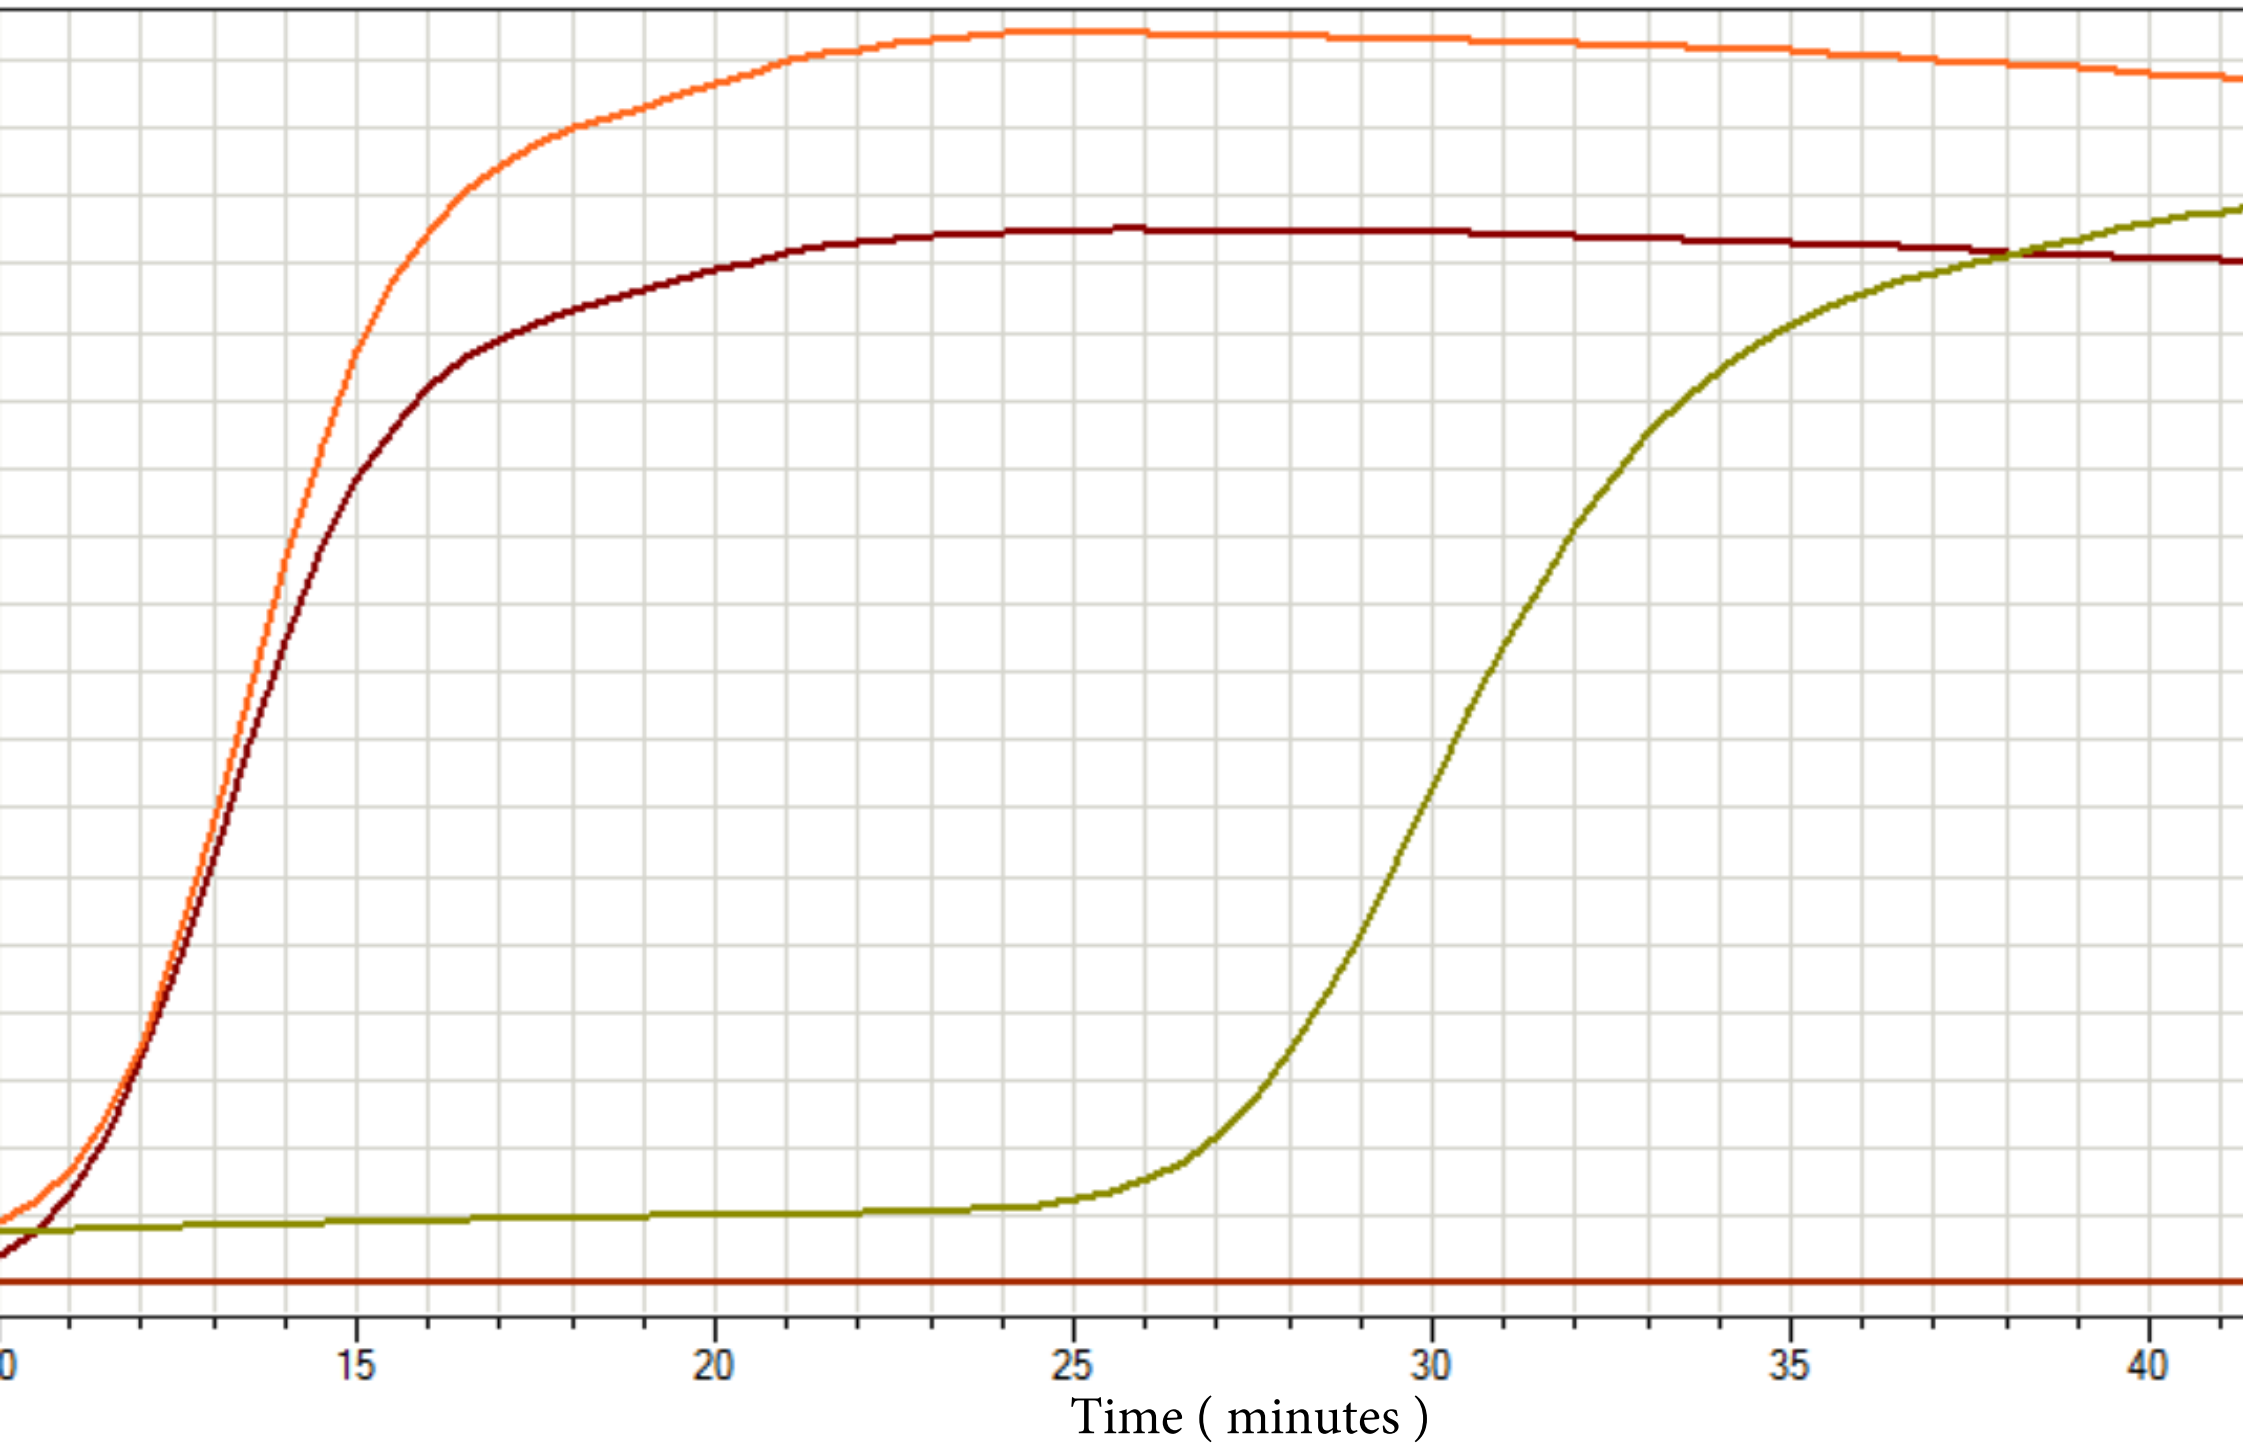

# Algorithm Processing Curve

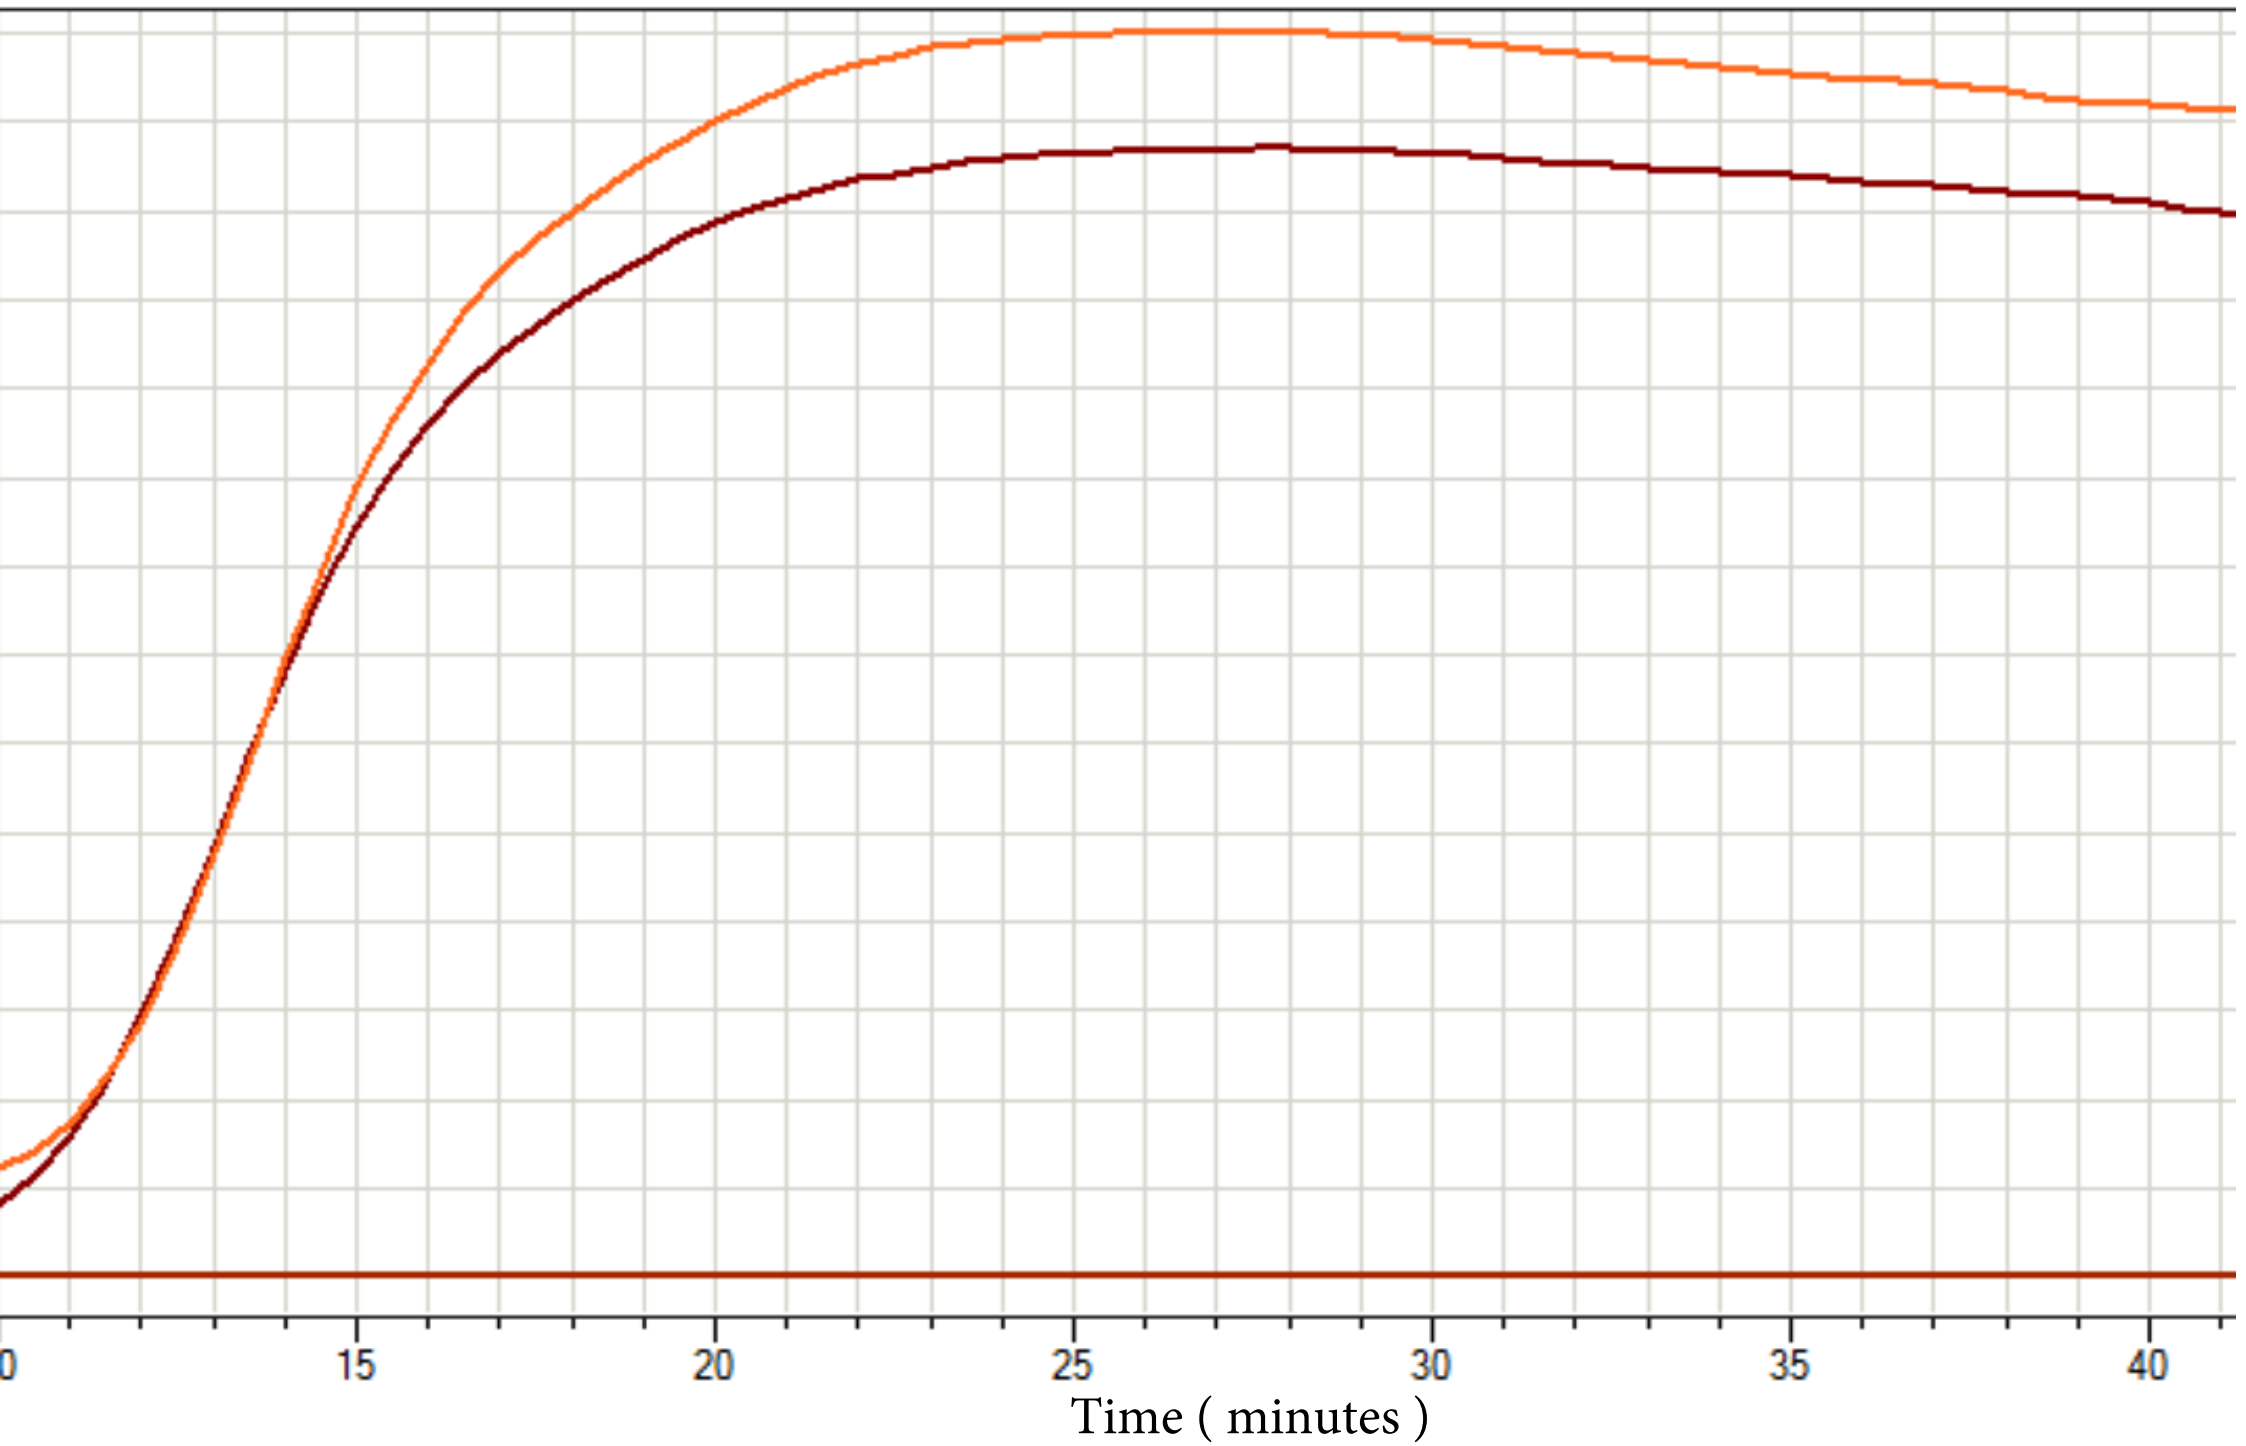

# Algorithm Processing Curve

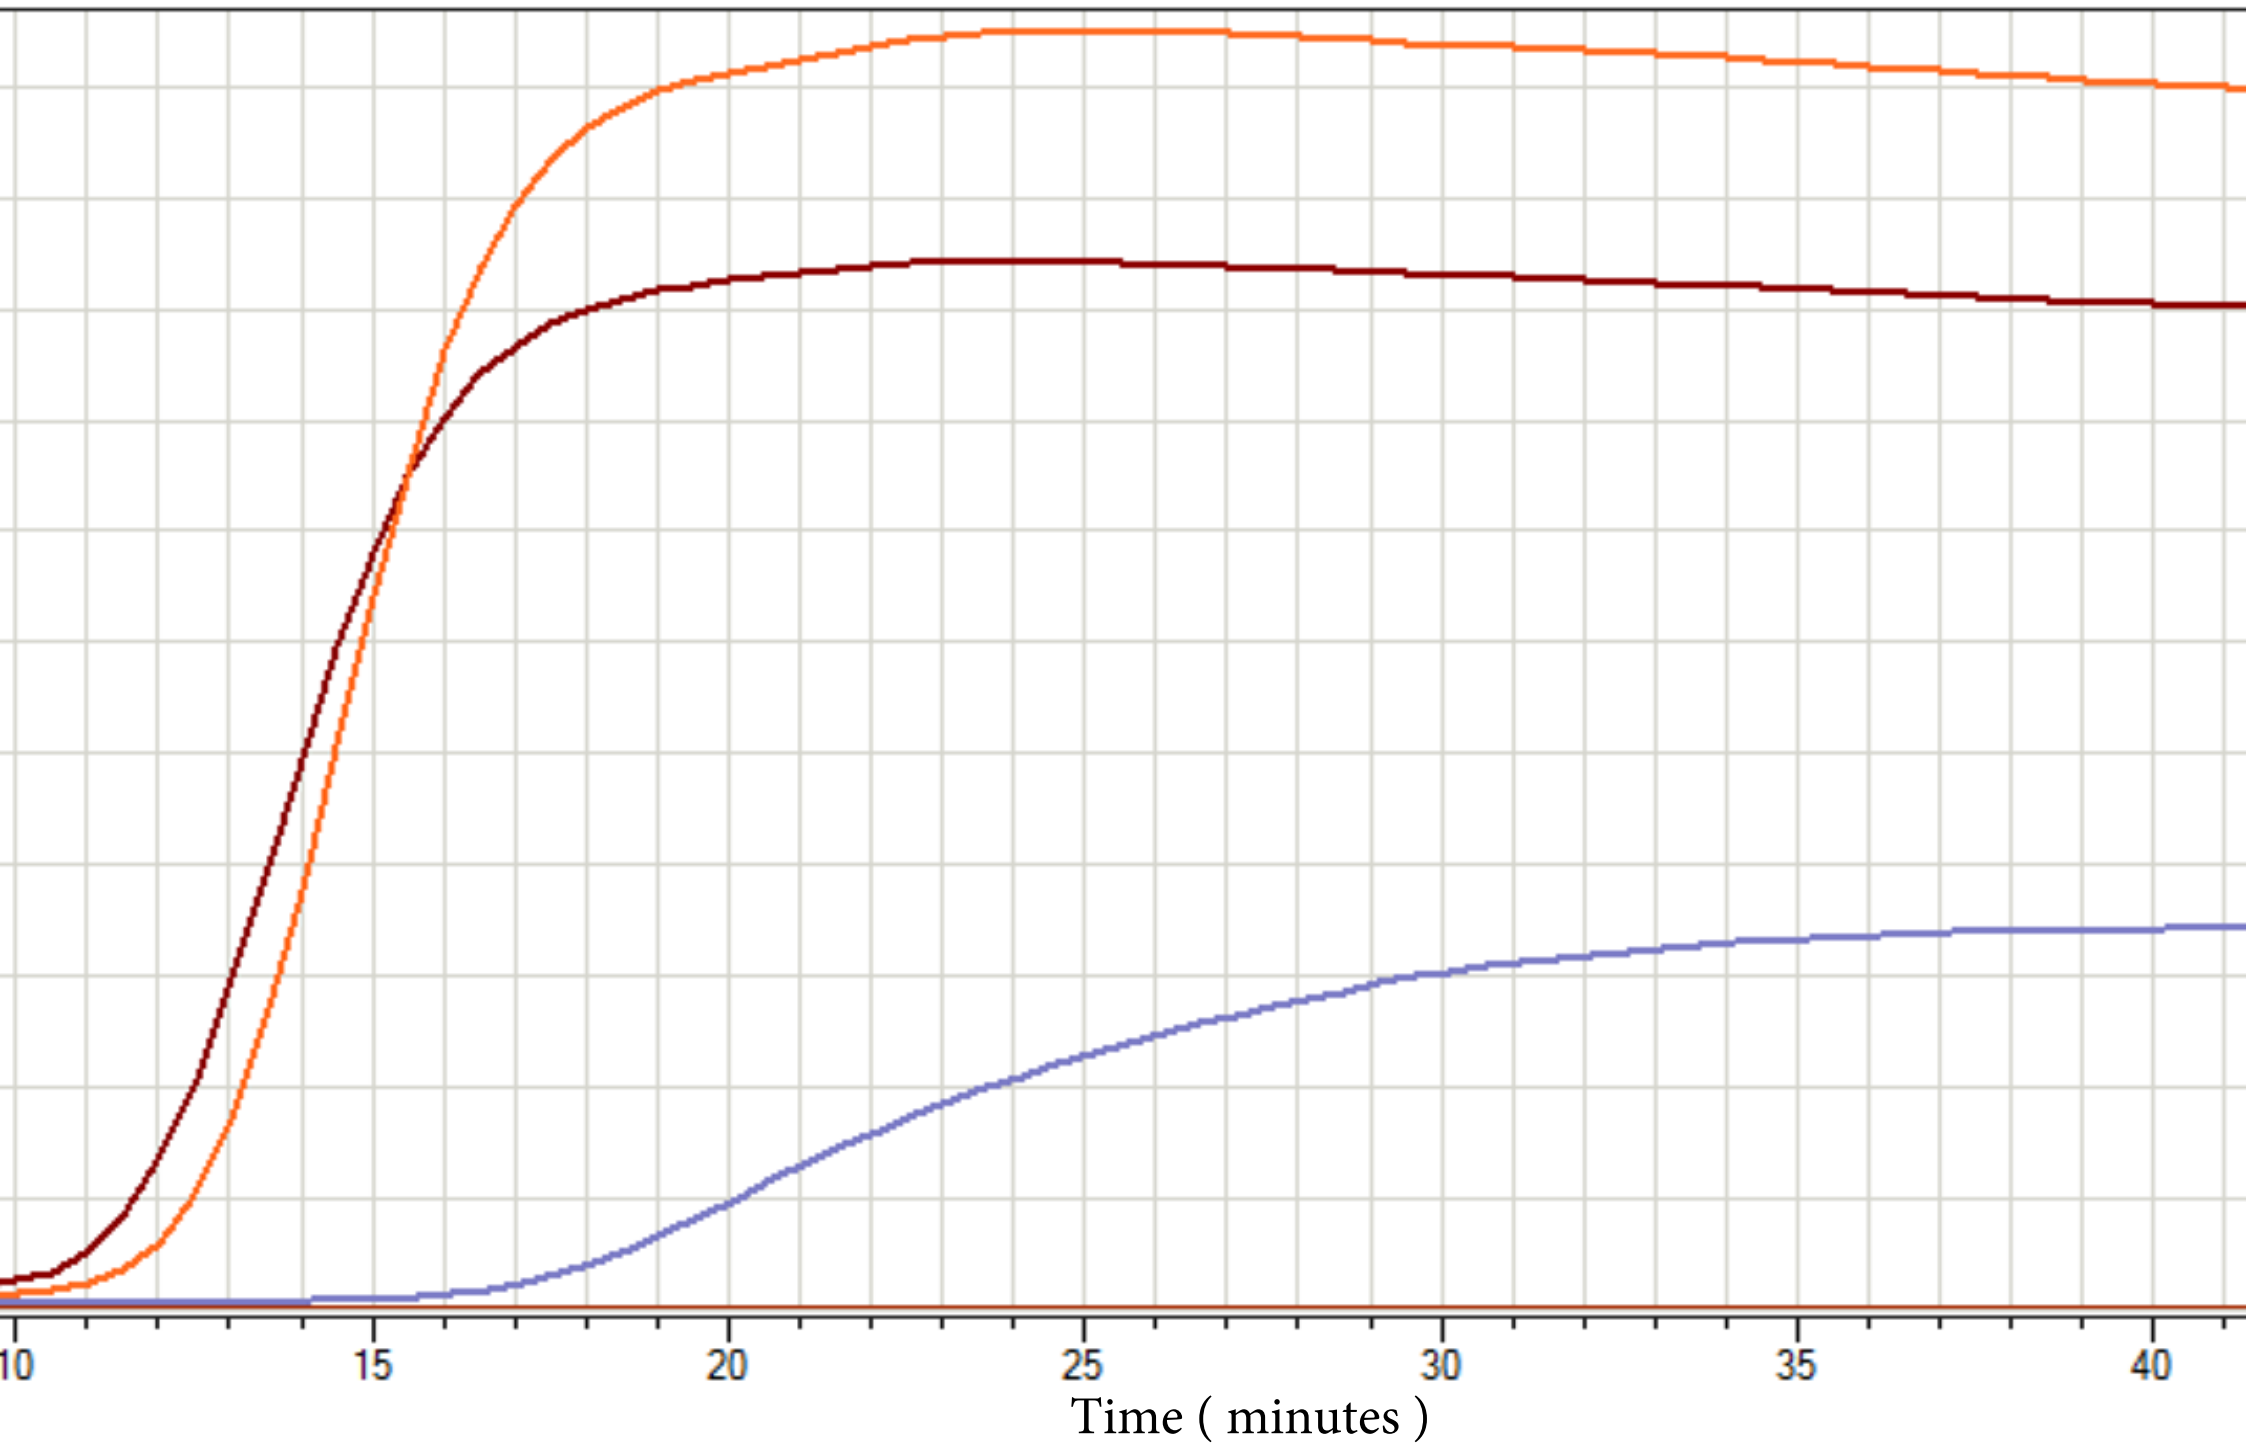



# Algorithm Processing Curve

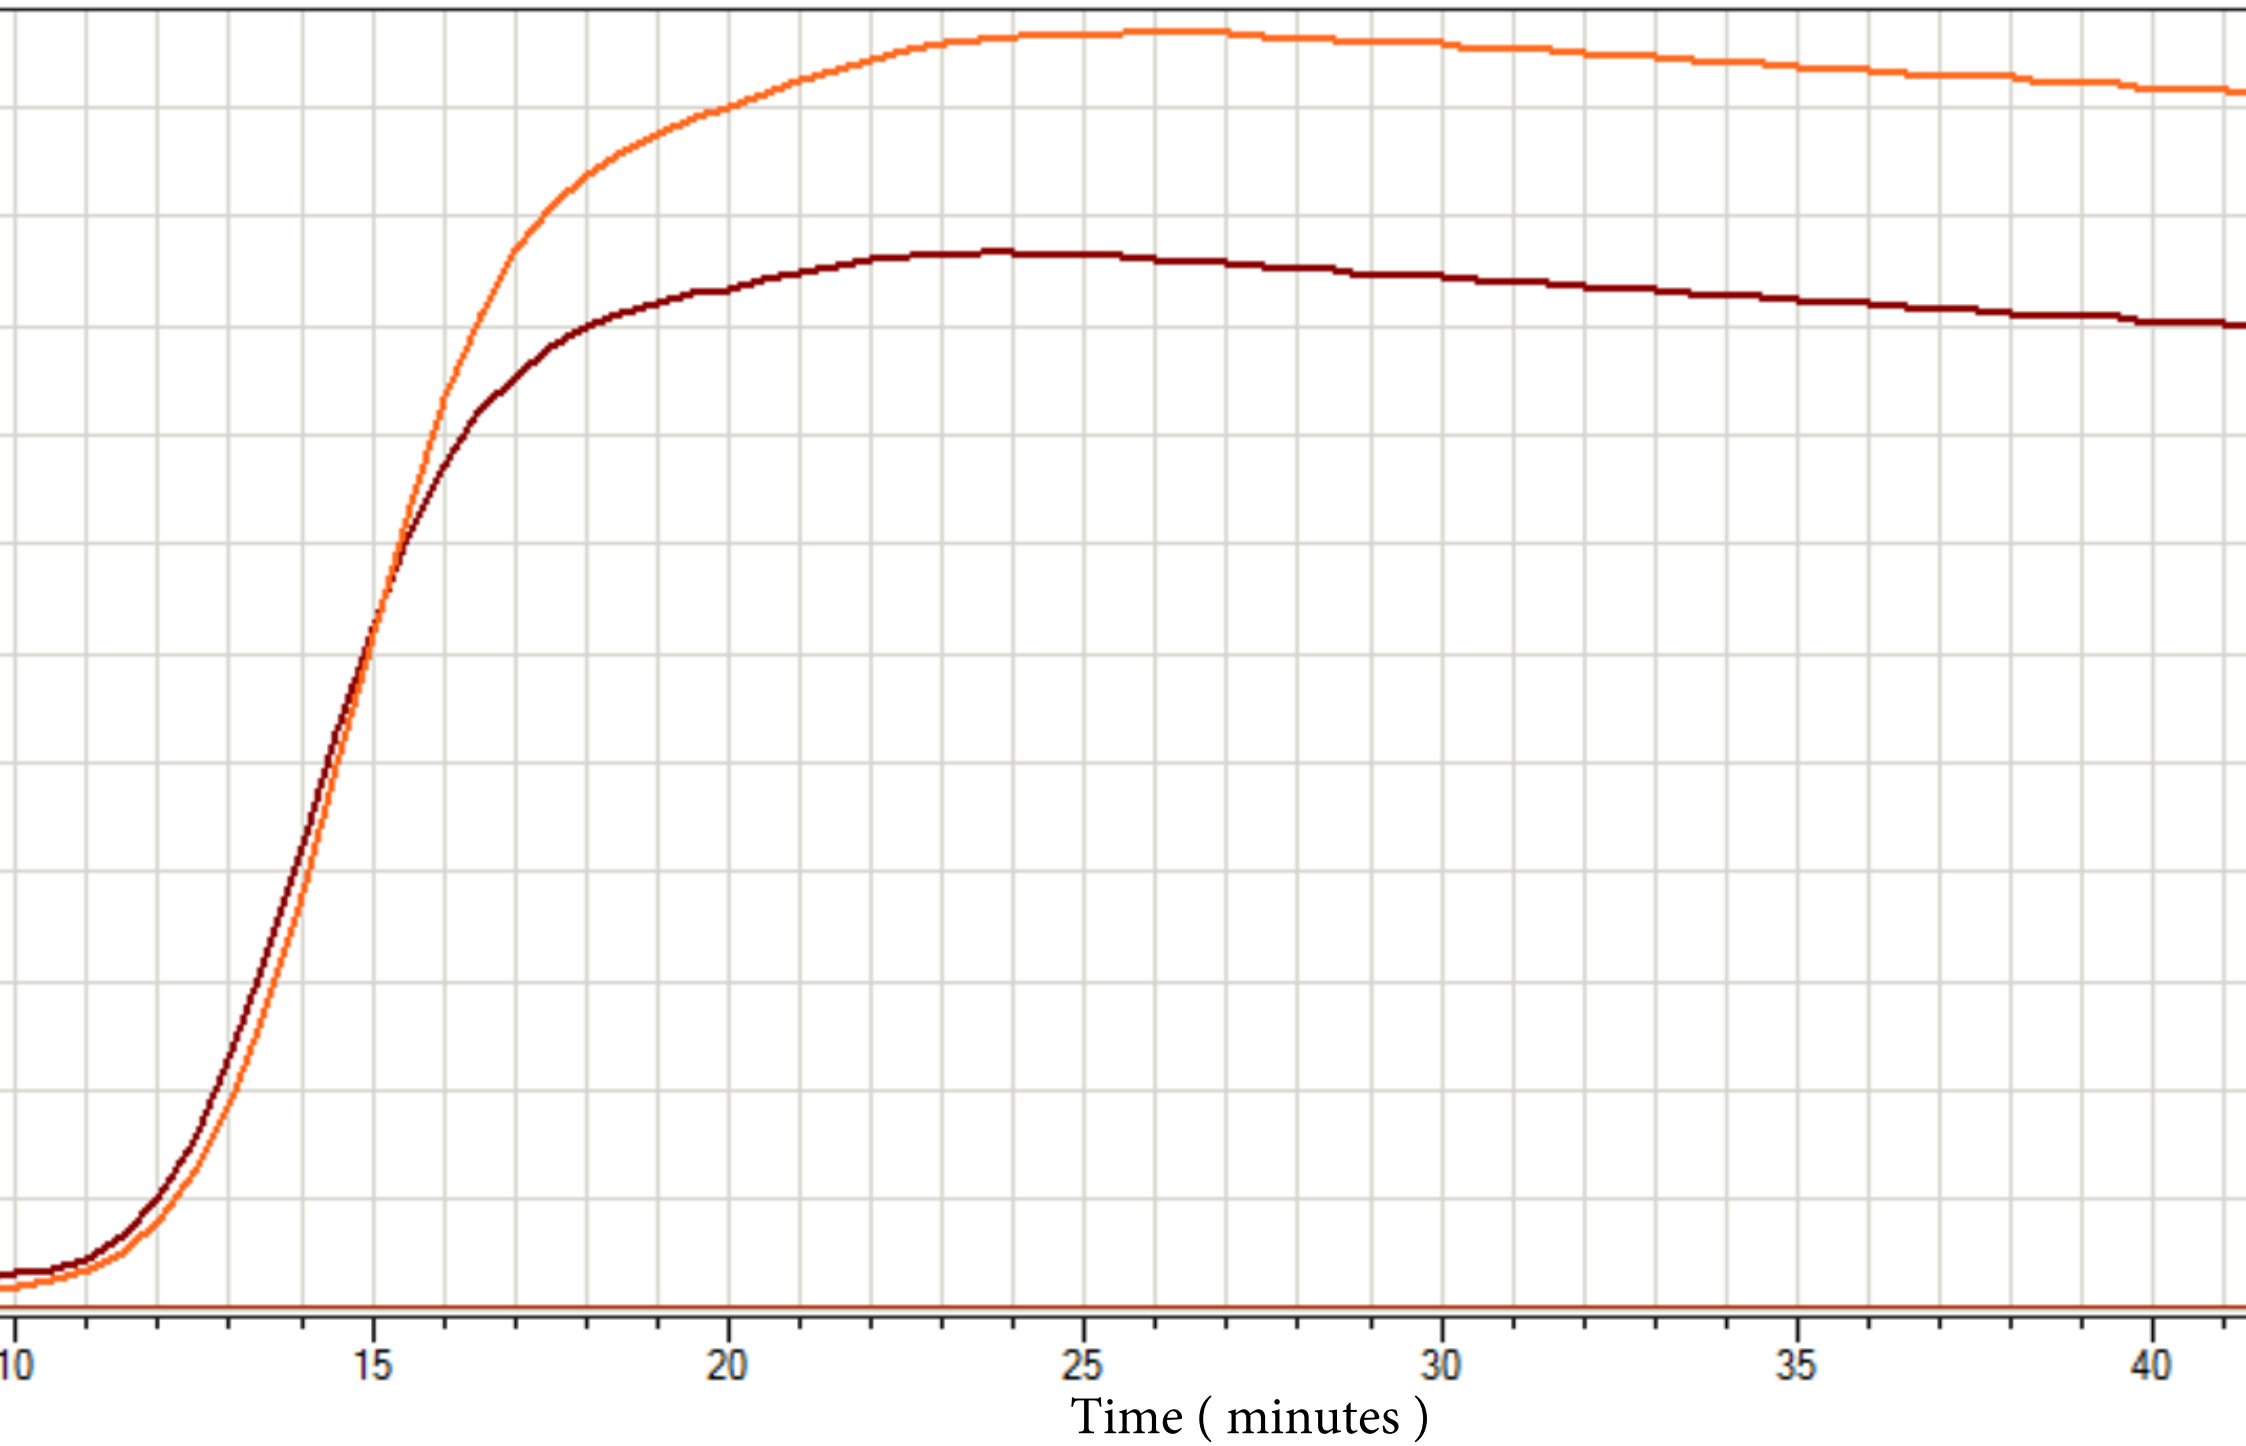

# Algorithm Processing Curve

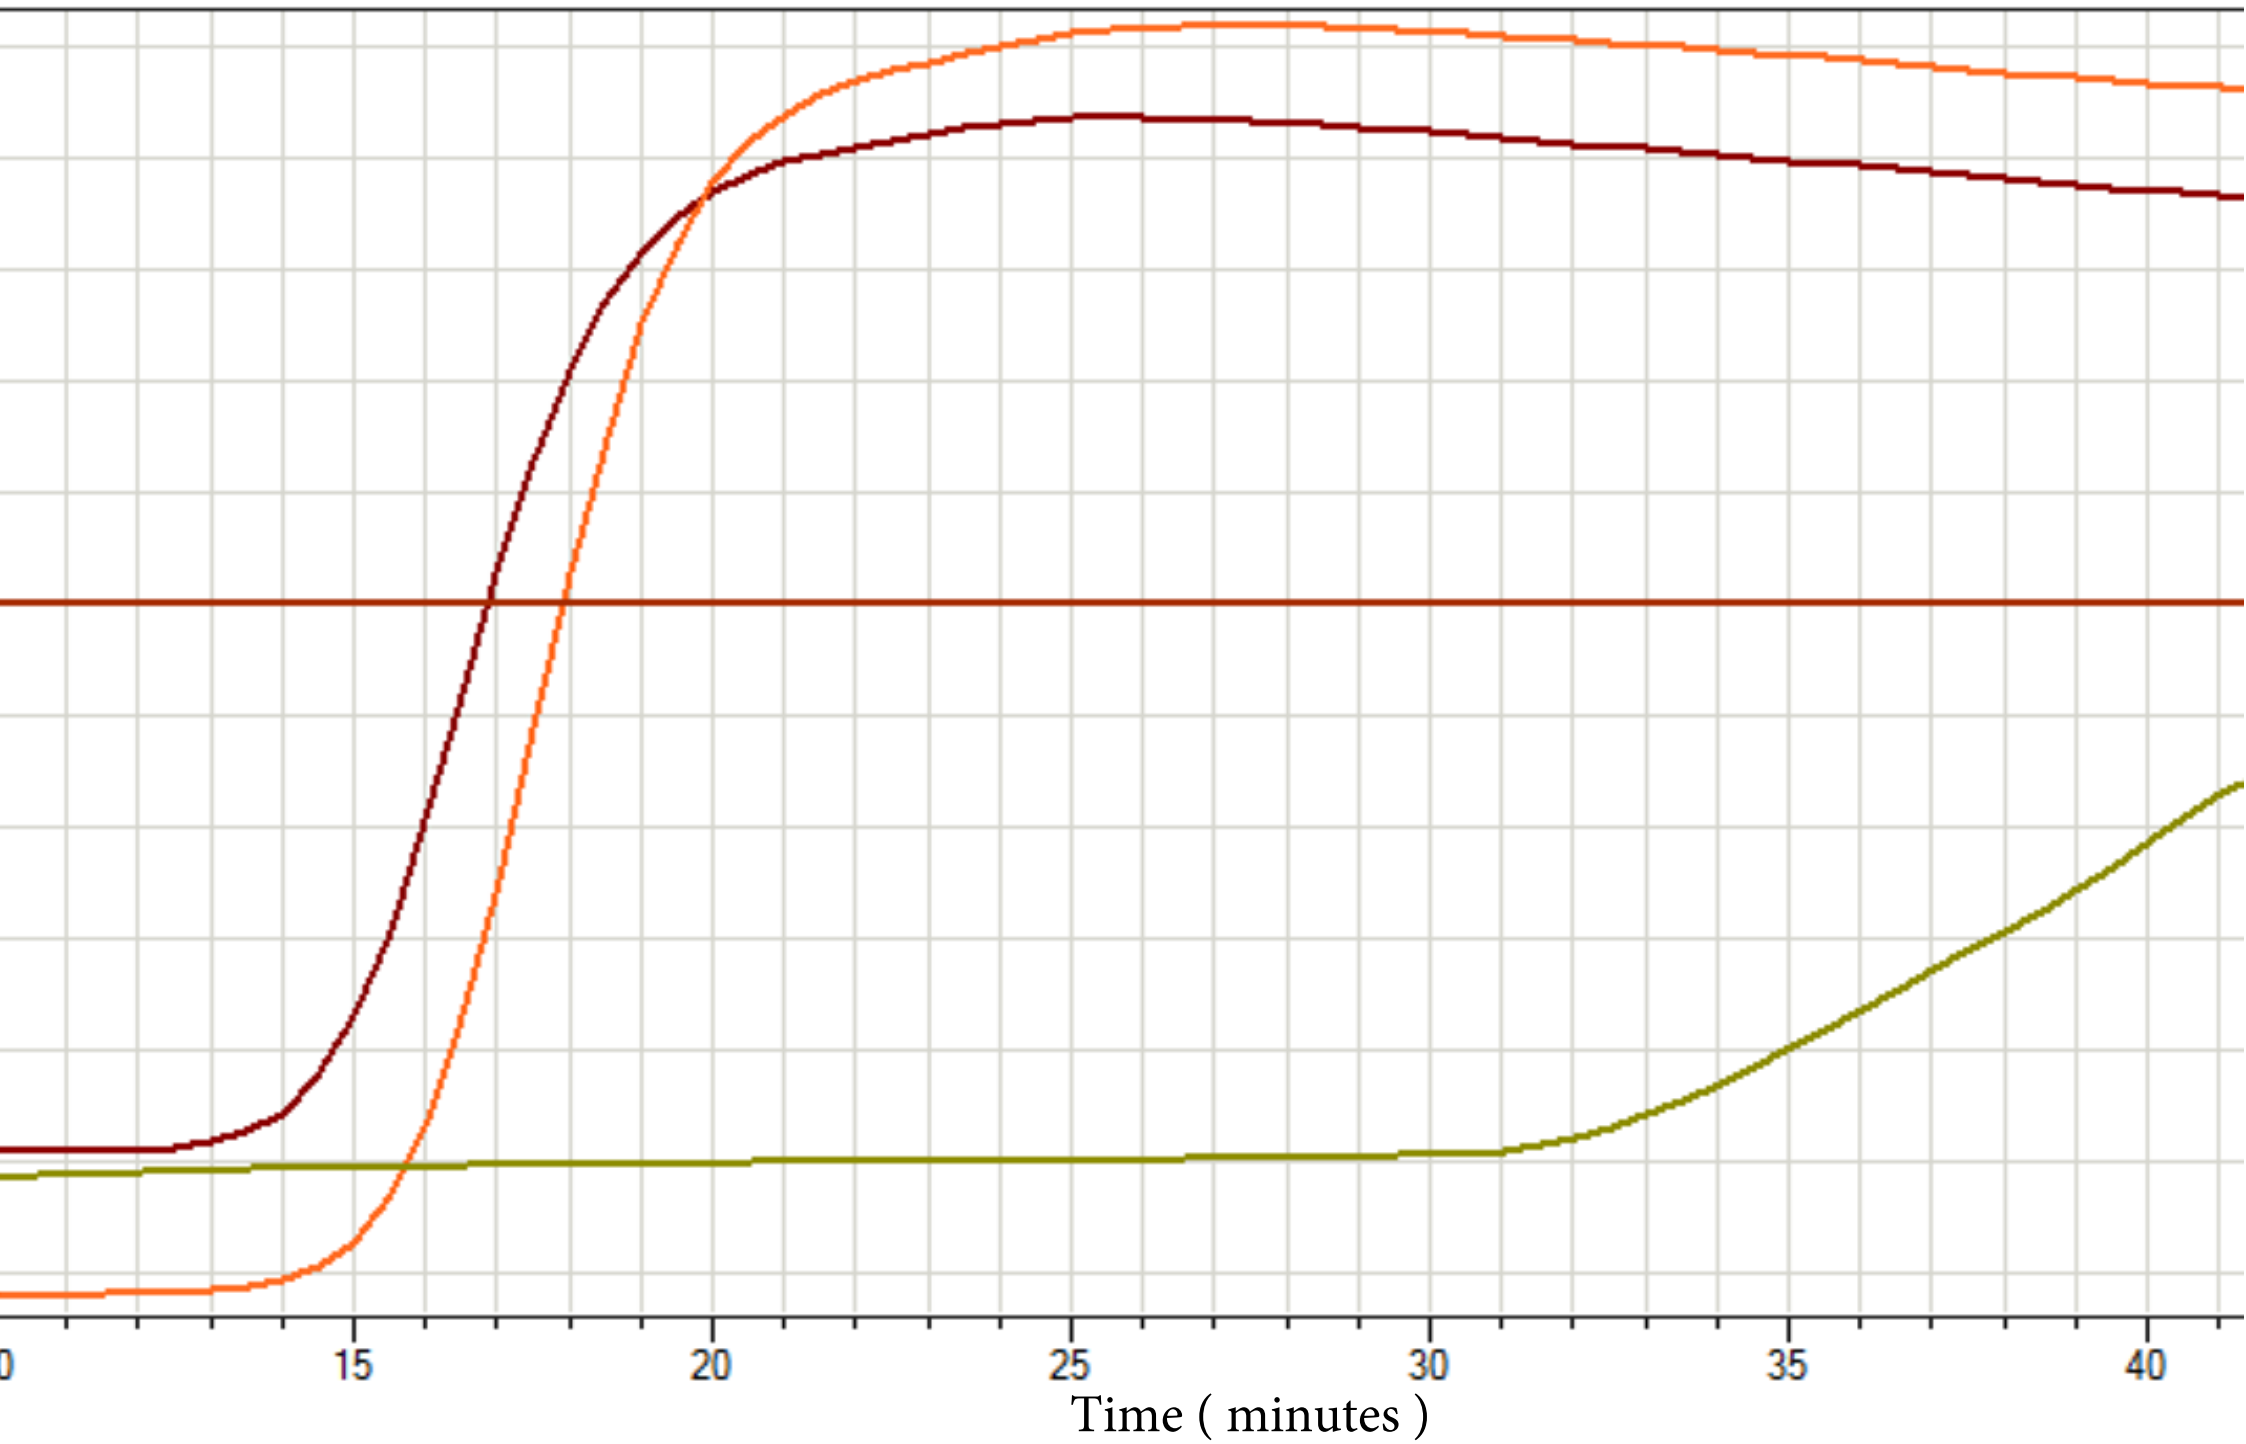

# Real-time Fluorescence Curve

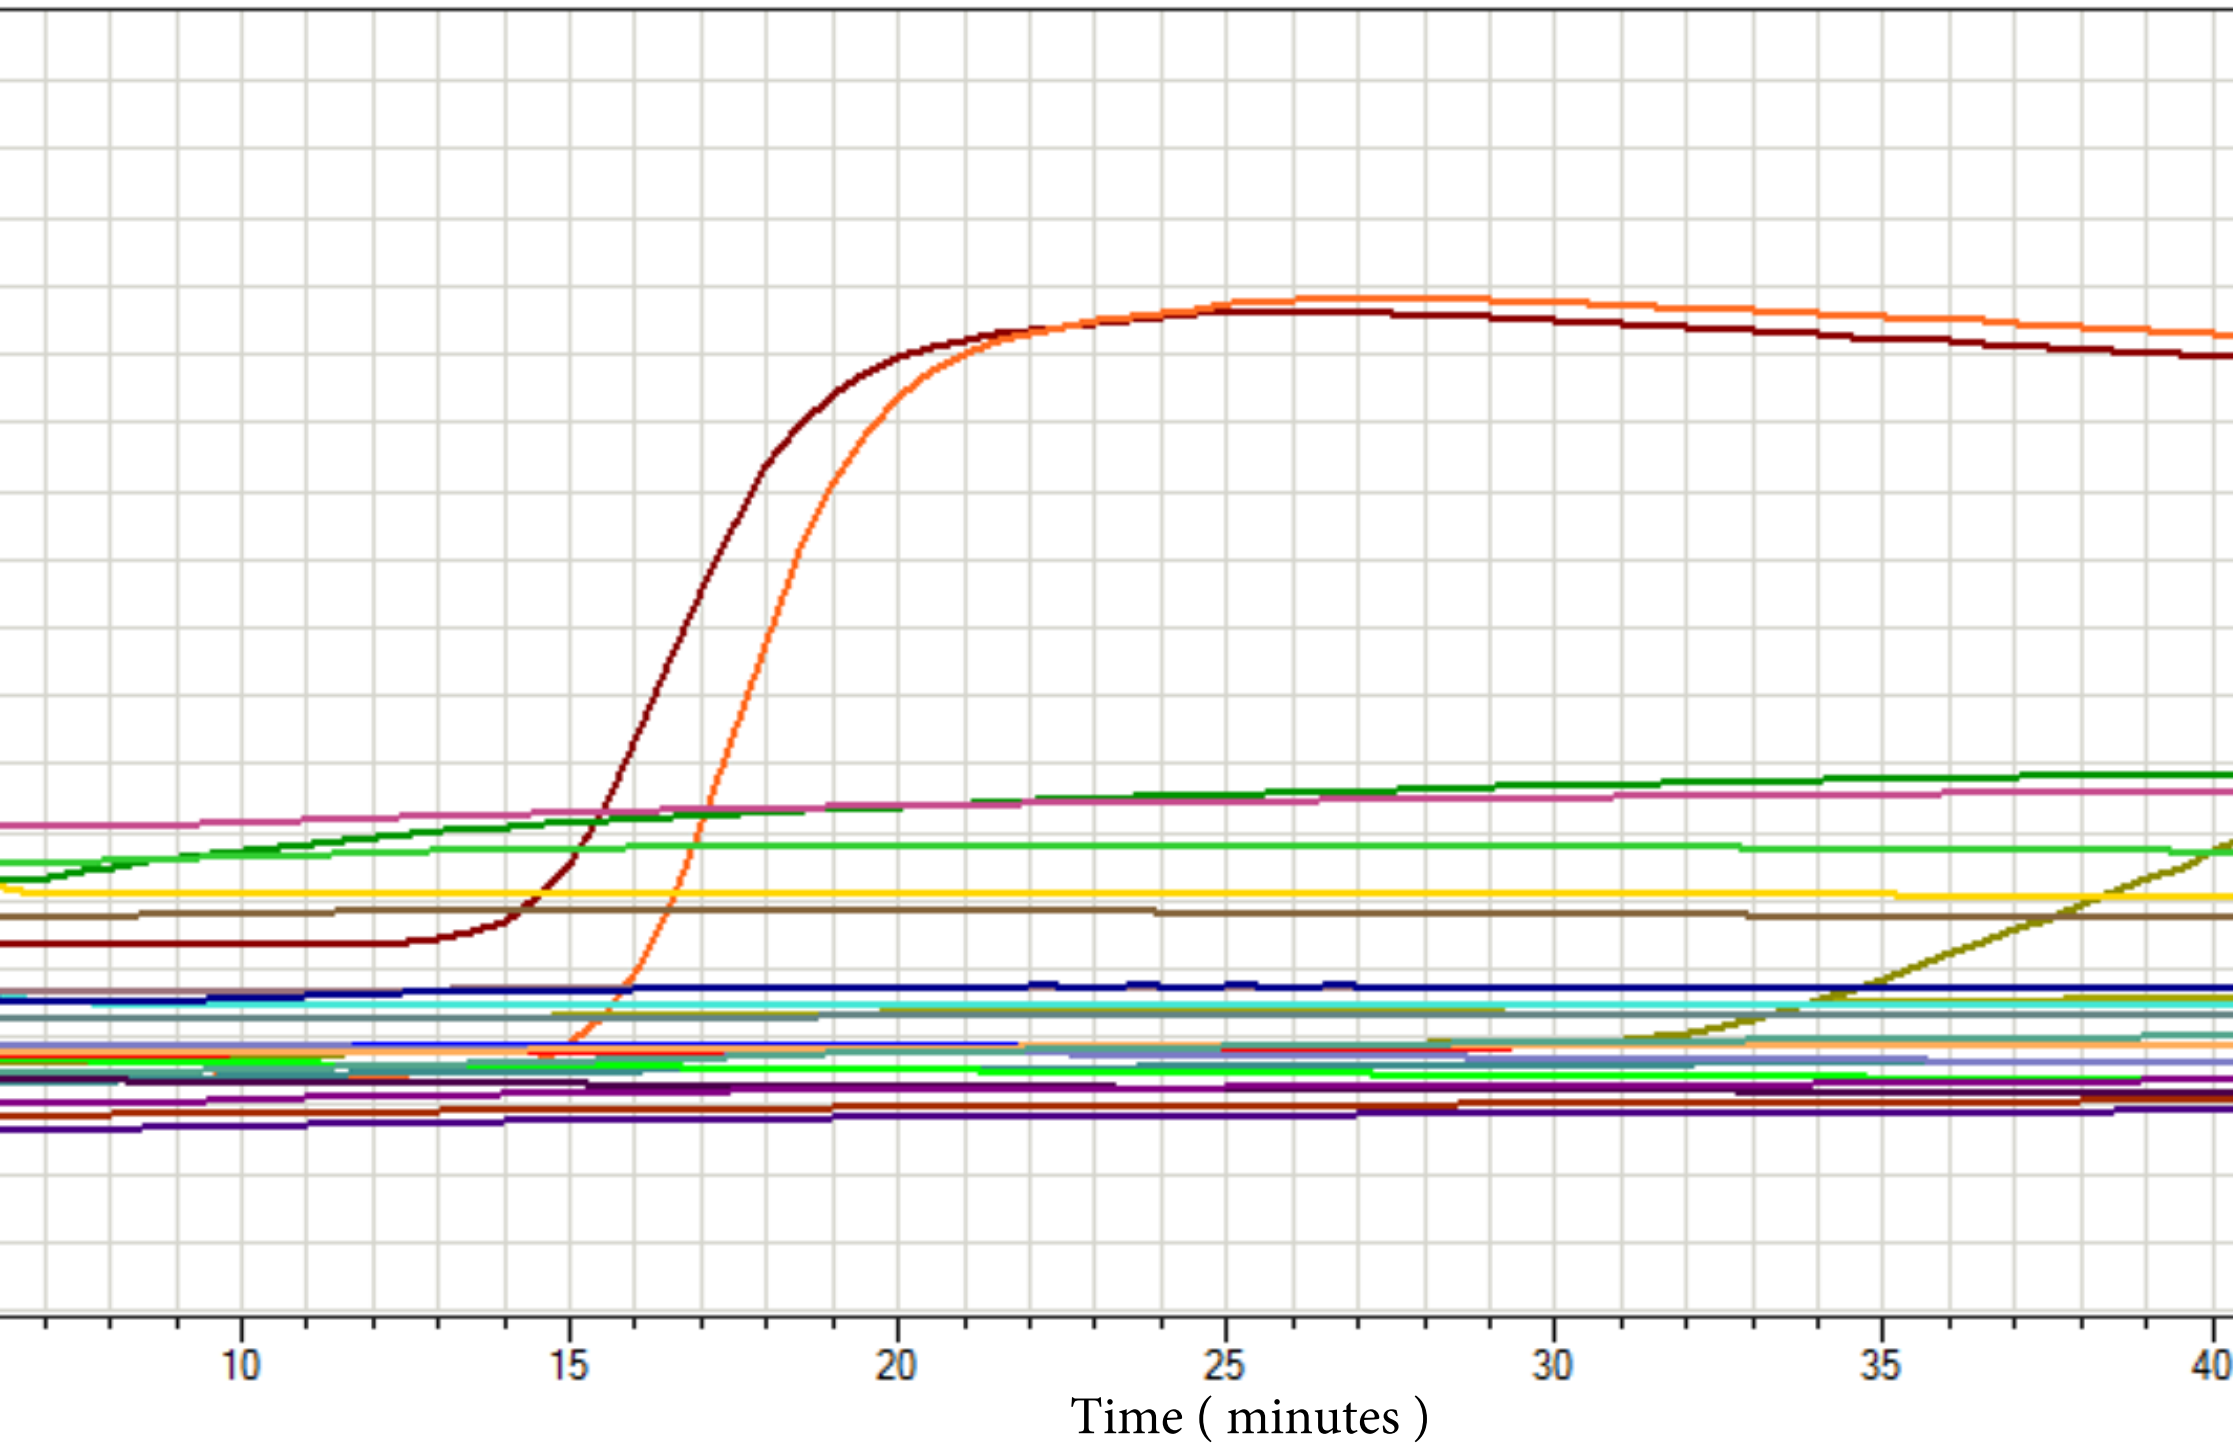

Supplement: MOESM1 [file 26872068]
