# Supplementary material for: Rapid detection of pathogenic fungi from coastal population with respiratory infections using microfluidic chip technology
Source: Springer Nature journal article supplement (doi:10.1186/s12879-024-09212-4), 2024-03-18

*C. Albicans*

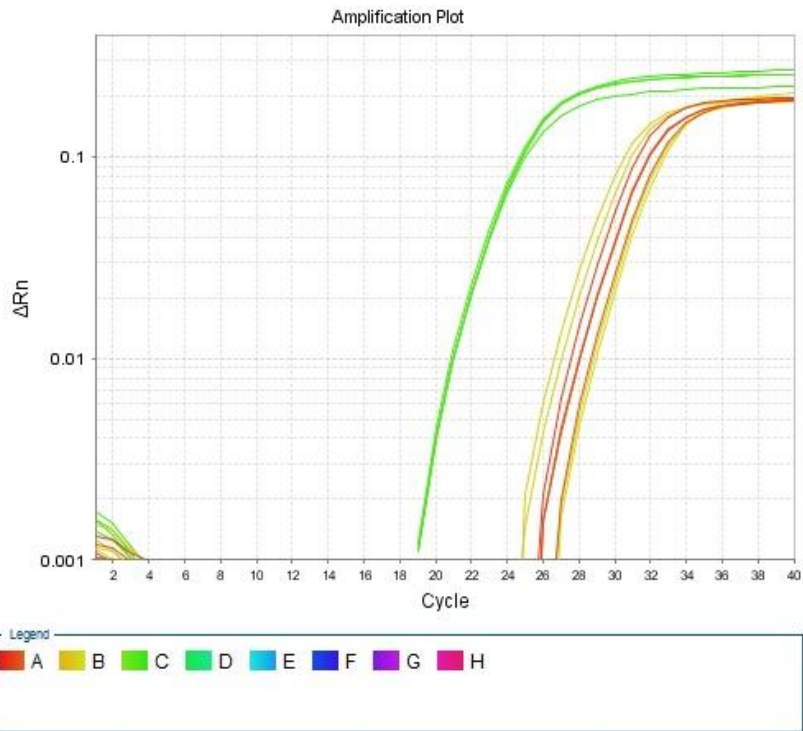

D.

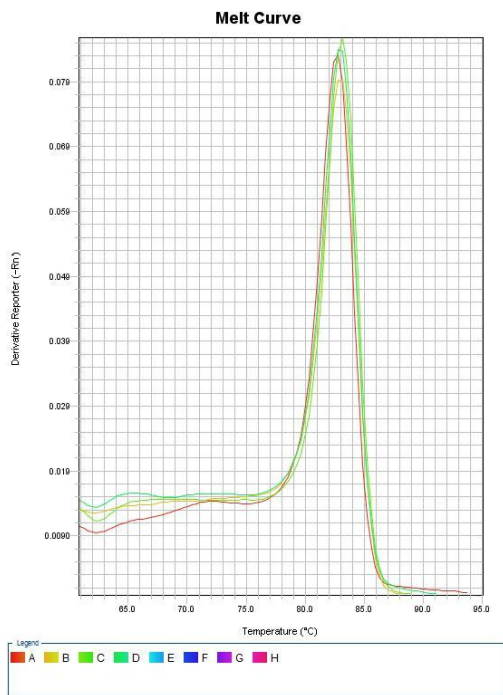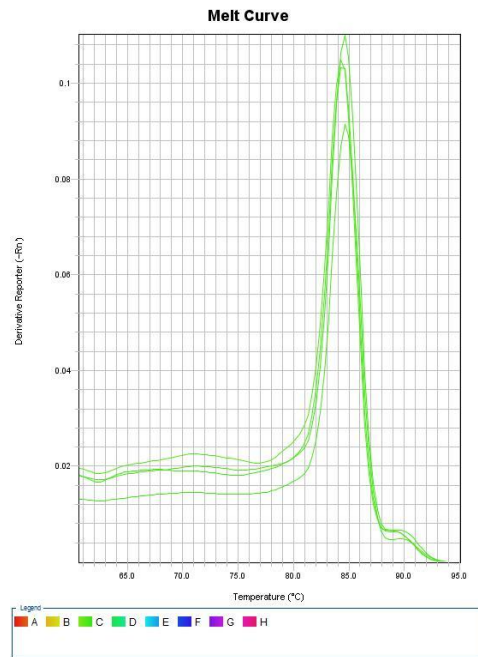

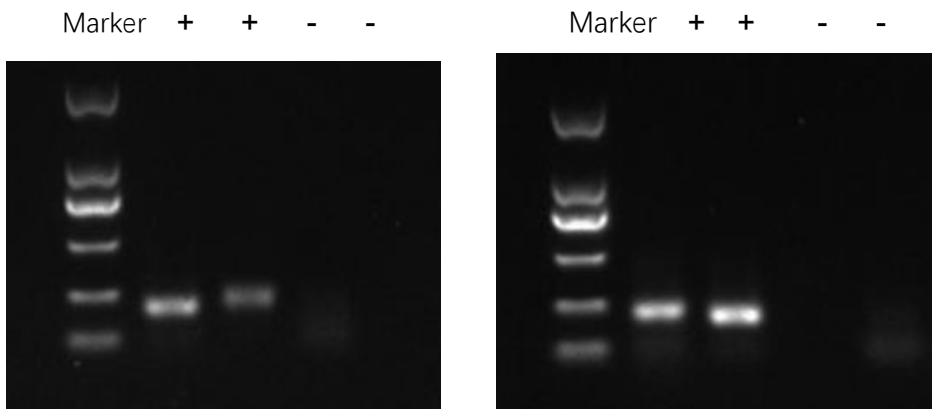

*C. tropicalis*

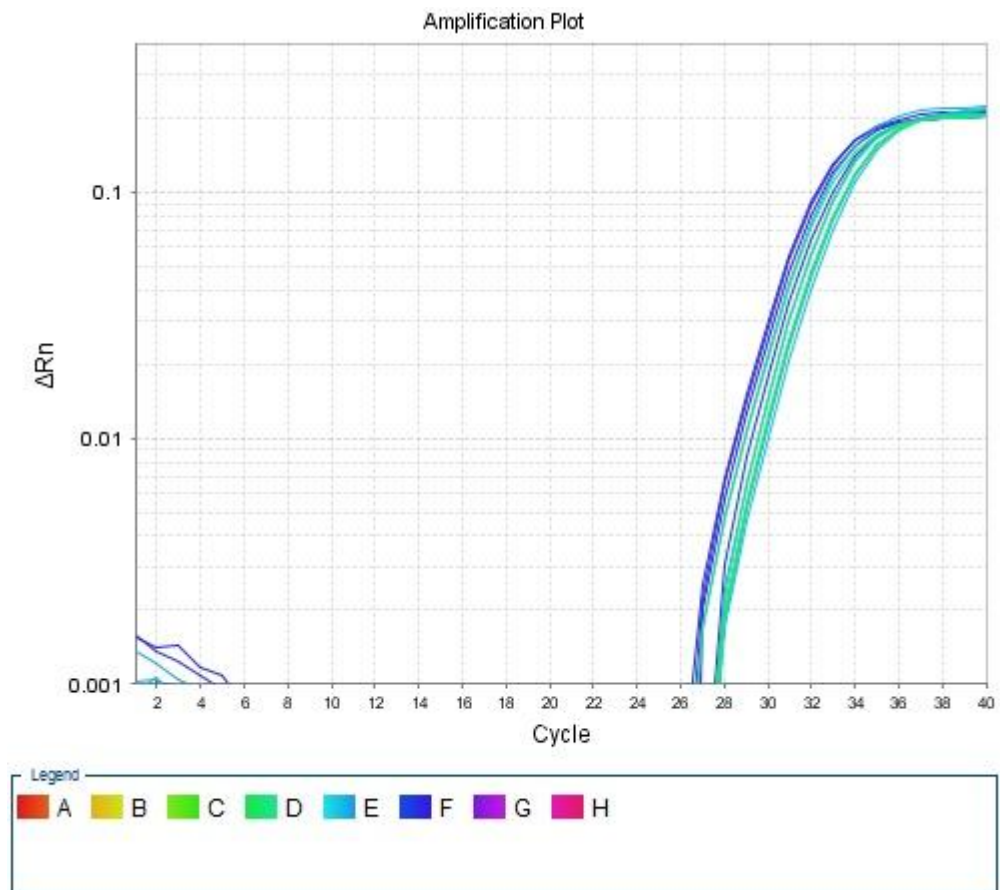

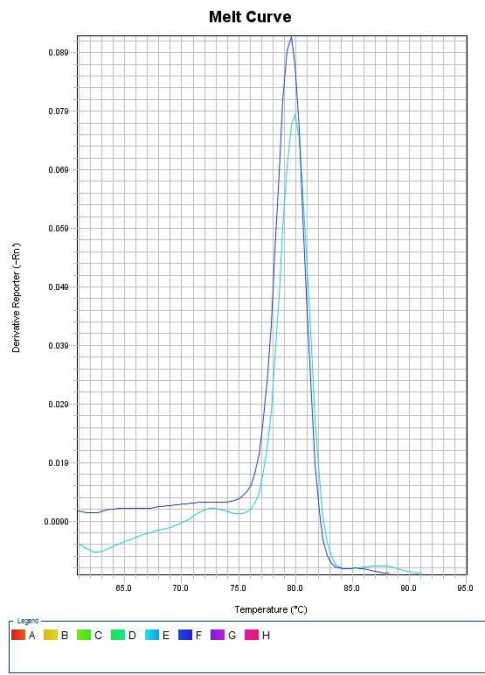

Marker    +    +    -                    Marker    +    +    -    -

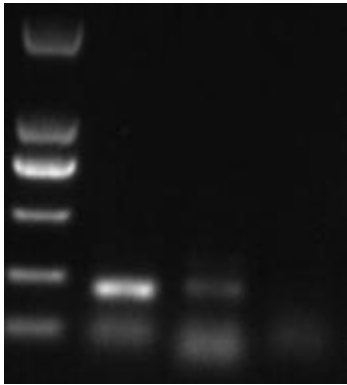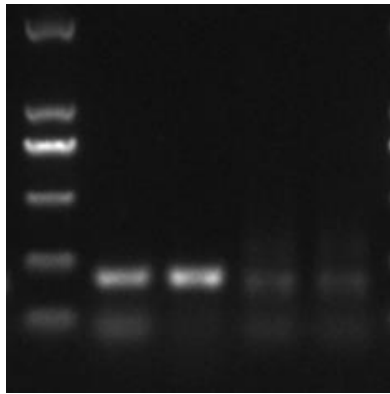

*C. glabrata*

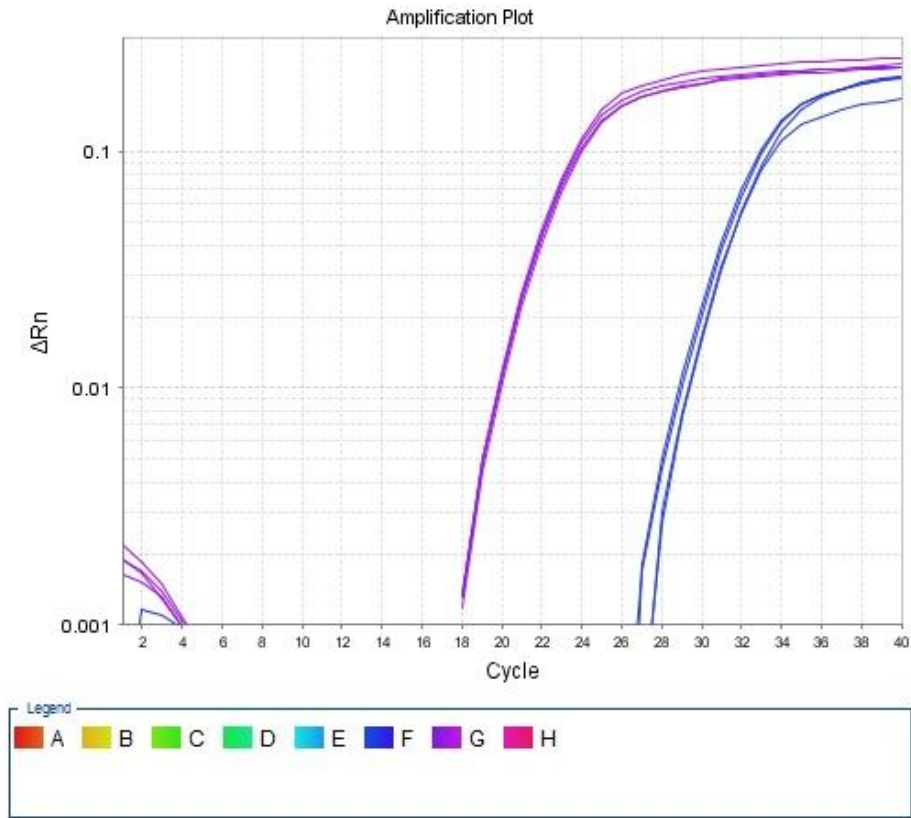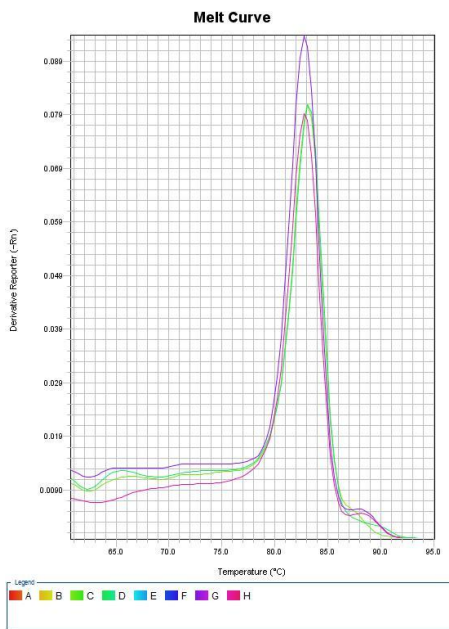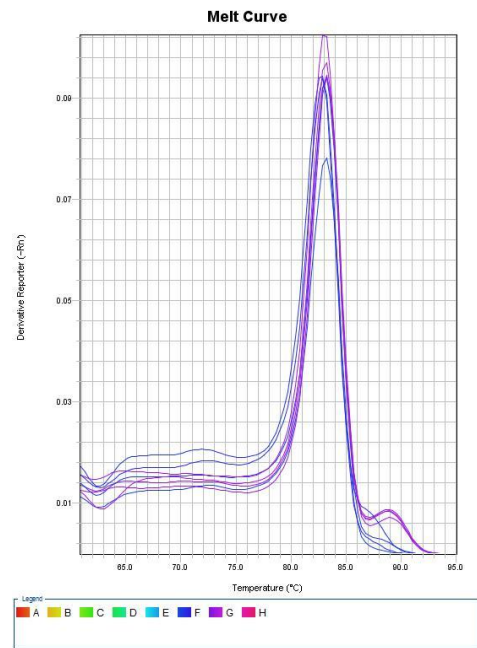

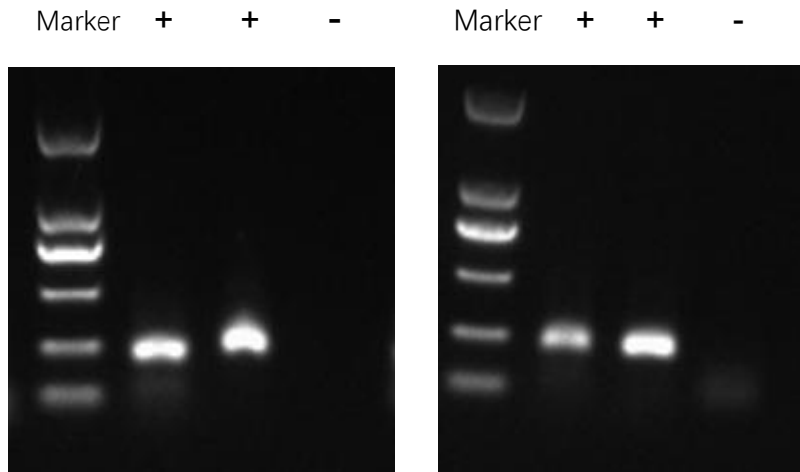

*C. parapsilosis*

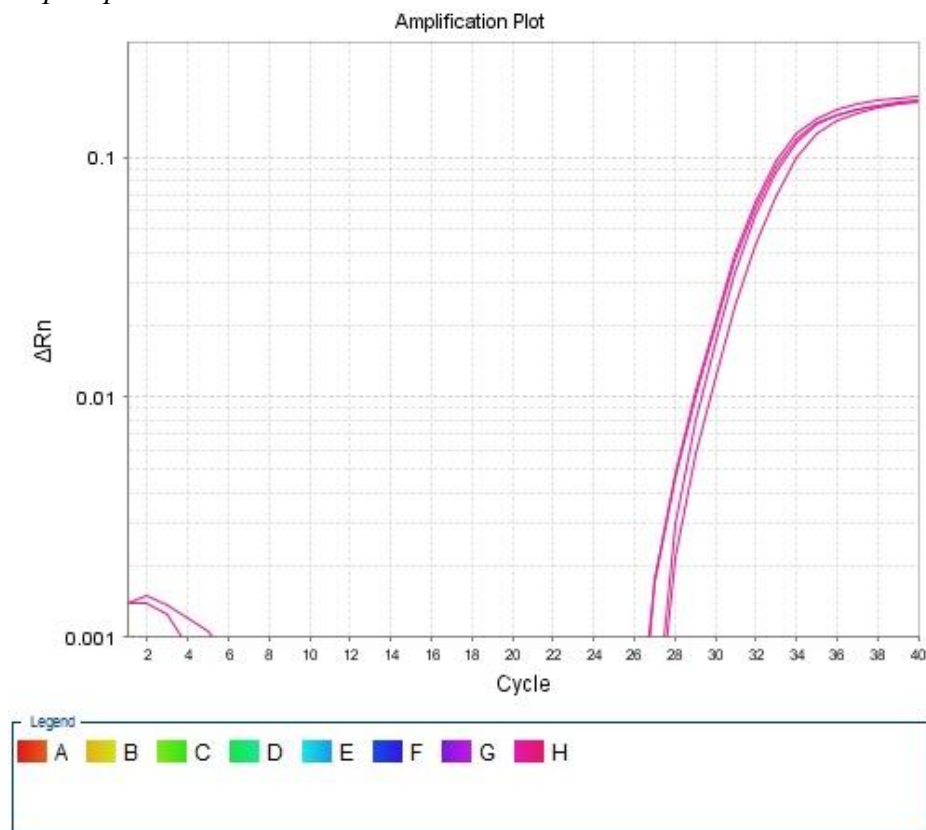

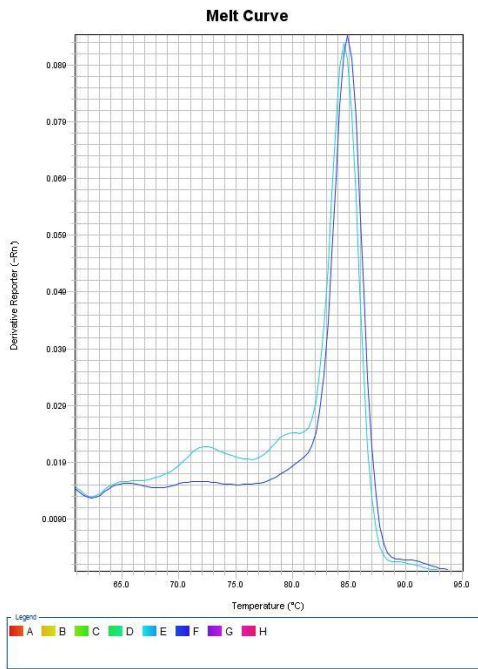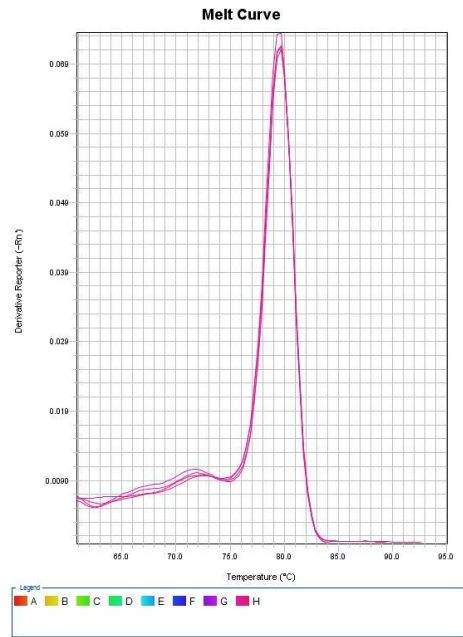

Marker    +    +    -

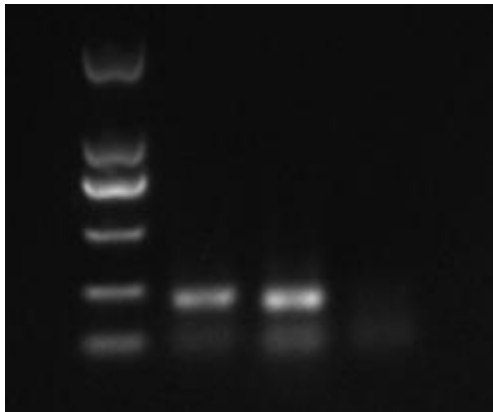

*C. krusei*

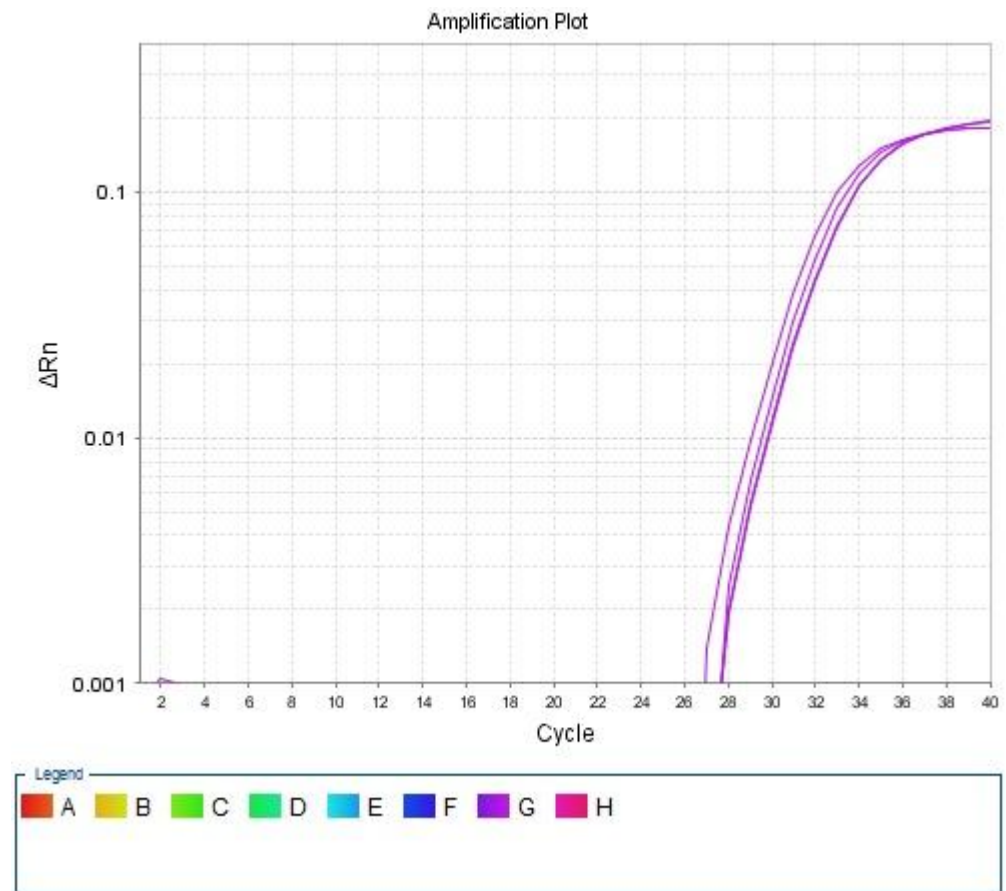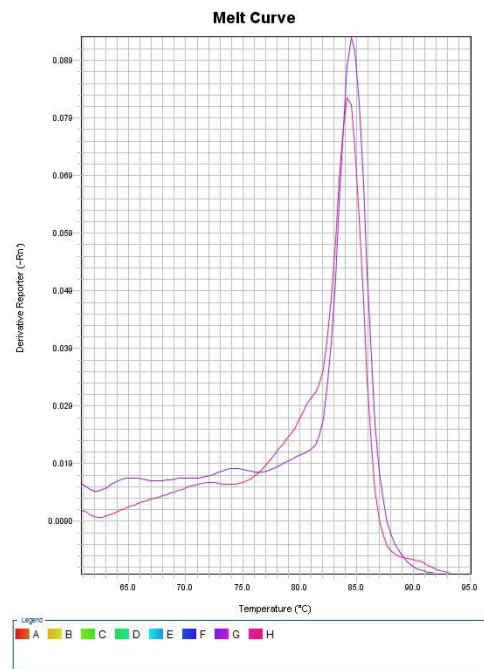

Marker + + - -

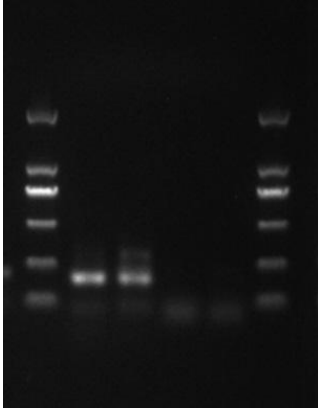

## GAPDH

*C. albicans*

Marker + + - -

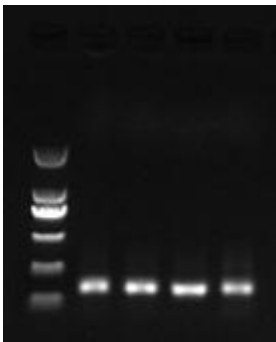

Marker + + - -

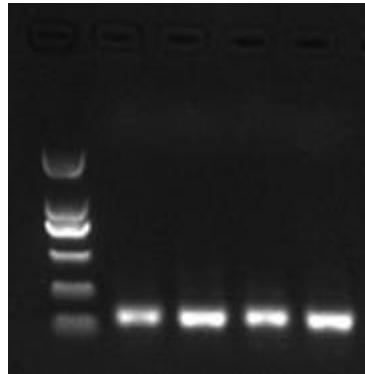

*C. tropicalis*

Marker + + - -

Marker + + - -



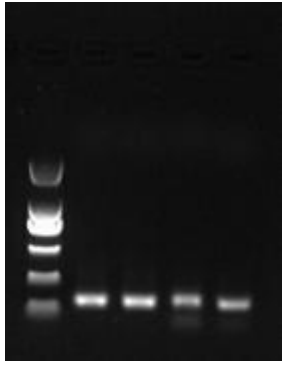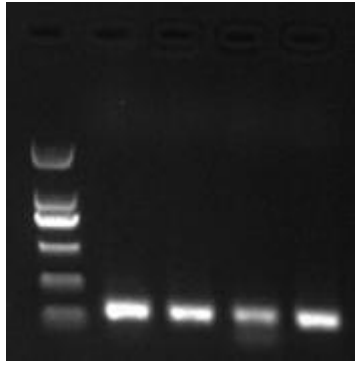

*D. Glabrata*

Marker + + - -

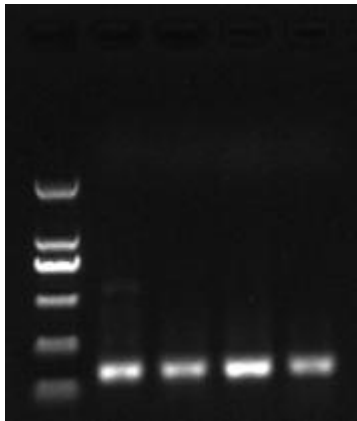

*C. Parapsilosis*

Marker + + - -

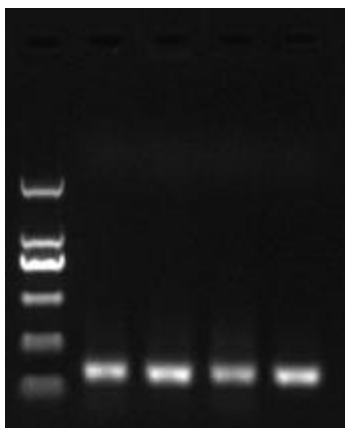

*C. krusei*

Marker + + - -

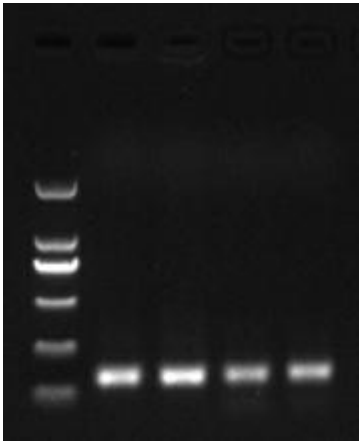

Supplement: MOESM2 [file 26872068]
